# Supplementary material for: Unexpected metal-free synthesis of trifluoromethyl arenes via tandem coupling of dicyanoalkenes and conjugated fluorinated sulfinyl imines
Source: Royal Society of Chemistry journal article supplement (doi:10.1039/d1cc03161a), 2021-01-01

## SUPPORTING INFORMATION

### Unexpected metal-free synthesis of trifluoroarenes via tandem coupling of dicyanoalkenes and conjugated fluorinated sulfinylimines

Alvaro Sanz-Vidal,<sup>a</sup> Daniel Gaviña,<sup>a</sup> Lia Sotorríos,<sup>b</sup> Enrique Gómez-Bengoa,<sup>b</sup> Fernando López Ortíz,<sup>c</sup> María Sánchez-Roselló<sup>a</sup> and Carlos del Pozo<sup>\*,a</sup>

<sup>a</sup> Departamento de Química Orgánica, Universidad de Valencia, 46100 Burjassot, España  
Fax: (+34)963544939; e-mail: [carlos.pozo@uv.es](mailto:carlos.pozo@uv.es)

<sup>b</sup> Department of Organic Chemistry I. University of Basque Country (UPV\_EHU). Manuel de Lardizabal 3. 20018 Donostia-San Sebastián (Spain).

<sup>c</sup> Área de Química Orgánica, Universidad de Almería, Carretera de Sacramento s/n, 04120 Almería (Spain).

#### Contents

|                                                                   |     |
|-------------------------------------------------------------------|-----|
| General Remarks                                                   | S2  |
| Starting dicyanoalkenes <b>1</b> and imines <b>2</b>              | S3  |
| Table S1. Optimization of the tandem reaction                     | S3  |
| Preparation of conjugated sulfonyl imine <b>2c</b>                | S4  |
| Preparation of conjugated sulfonyl imine <b>2d</b>                | S5  |
| Preparation of conjugated sulfonyl imine <b>2g</b>                | S5  |
| Preparation of conjugated sulfonyl imine <b>2h</b>                | S6  |
| Preparation of conjugated sulfonyl imines <b>2i</b>               | S6  |
| General procedure for the preparation of trifluoroarenes <b>3</b> | S6  |
| Preparation of compound <b>4</b>                                  | S17 |
| X-Ray structure of compound <b>3d</b>                             | S21 |
| X-Ray structure of compound <b>3e</b>                             | S22 |
| Theoretical supporting information                                | S23 |
| NMR spectra of new compounds                                      | S48 |

## General remarks.

Reactions were carried out under a nitrogen atmosphere unless otherwise indicated. Solvents were purified prior to use: THF and PhMe were distilled from sodium, and CH<sub>2</sub>Cl<sub>2</sub> was distilled from calcium hydride. The reactions were monitored with by means of TLC on 0.25 mm precoated silica gel plates. Visualization was carried out with UV light and potassium permanganate stain. Flash column chromatography was performed with the indicated solvents on silica gel 60 (particle size 0.040–0.063 mm). <sup>1</sup>H and <sup>13</sup>C-NMR spectra were recorded on a 300 MHz spectrometer. Chemical shifts are given in ppm (δ), referenced to the residual proton resonances of the solvents. Coupling constants (J) are given in hertz (Hz). The letters m, s, d, t, and q stand for multiplet, singlet, doublet, triplet, and quartet, respectively. The designation br indicates that the signal is broad. The abbreviations DCM and THF indicate dichloromethane and tetrahydrofuran, respectively. A QTOF mass analyzer system has been used for the HRMS measurements. Dicyanoalkenes **1** were prepared following known methodologies.<sup>1</sup> Imines **2a**,<sup>2</sup> **2b**,<sup>3</sup> **2e**,<sup>2</sup> **2f**, **2k**<sup>4</sup> and **2i**<sup>5</sup> were previously described.

---

<sup>1</sup> a) D. Xue, Y.-C. Chen, X. Cui, Q.-W. Wang, J. Zhu, J.-G. Deng, *J. Org. Chem*, 2005, **70**, 3584; b) J. Lu, F. Liu, T.-P. Loh, *Adv. Synth. Catal.* 2008, **350**, 1781. c) M. D. Kilde, P. G. Arroyo, A. S. Gertsen, K. V. Mikkelsen, M. B. Nielsen, *RSC Adv.* 2018, **8**, 6356.

<sup>2</sup> Z.-J. Liu, J.-T. Liu, *Chem. Commun.* 2008, 5233.

<sup>3</sup> D. Enders, K. Gottfried, G. Raabe, *Adv. Synth. Catal.* 2010, **352**, 3147.

<sup>4</sup> P. Liu, Z.-G. Liu, F. Wu, *Adv. Synth. Catal.* 2015, **357**, 818.

<sup>5</sup> L. G. Borrego, R. Recio, M. Alcarranza, N. Khair, I. Fernández, *Adv. Synth. Catal.* 2018, **360**, 1273.

Starting dicyanoalkenes **1** and sulfinyl imines **2**.

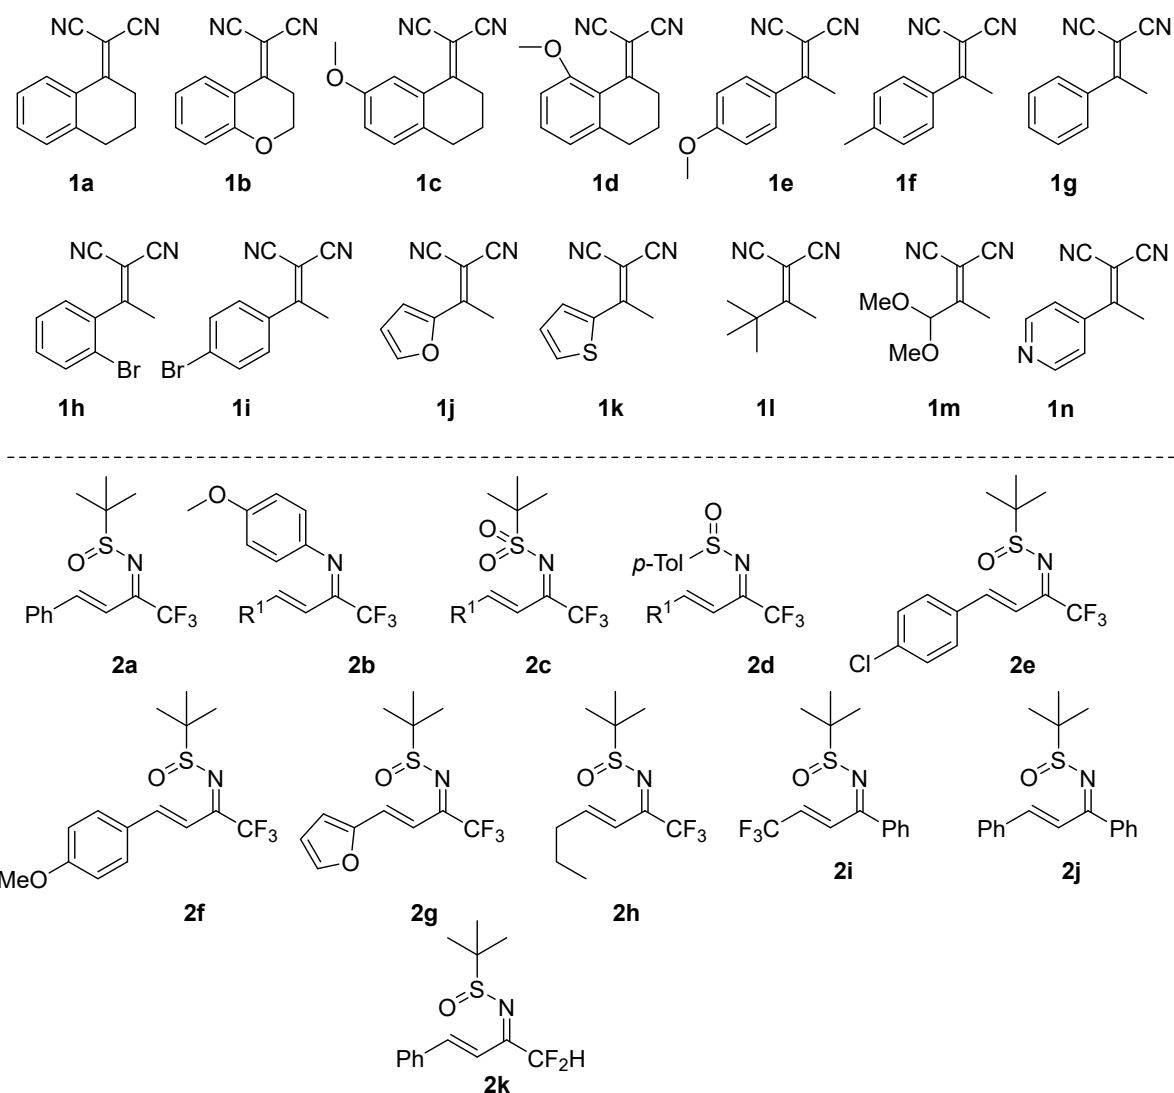

**Table S1.** Optimization of the reaction of dicyanoalkene **1a** with fluorinated imines **2a-c**<sup>a</sup>

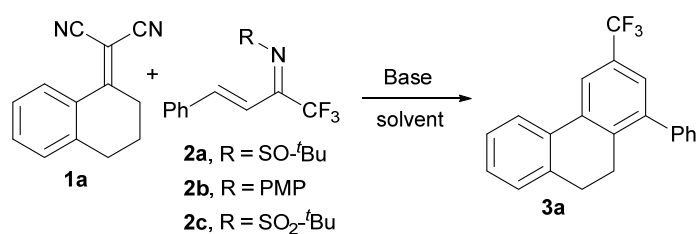

| Entry | base                         | solvent | <b>2</b>  | <b>3a</b> (yield %) <sup>b</sup> |
|-------|------------------------------|---------|-----------|----------------------------------|
| 1     | <i>t</i> -BuOK               | DCM     | <b>2a</b> | - <sup>c</sup>                   |
| 2     | NaH                          | THF     | <b>2a</b> | 45                               |
| 3     | P <sub>2</sub> - <i>t</i> Bu | DCM     | <b>2a</b> | 75                               |
| 4     | KHMDS                        | DCM     | <b>2a</b> | 0                                |

|    |                                 |                    |           |                |
|----|---------------------------------|--------------------|-----------|----------------|
| 5  | Na <sub>2</sub> CO <sub>3</sub> | DCM                | <b>2a</b> | 0              |
| 6  | DBU                             | DCM                | <b>2a</b> | 88             |
| 7  | Et <sub>3</sub> N               | DCM                | <b>2a</b> | 0              |
| 8  | DABCO                           | DCM                | <b>2a</b> | 0              |
| 9  | TBAF                            | DCM                | <b>2a</b> | 0              |
| 10 | DBU                             | DCE                | <b>2a</b> | 85             |
| 11 | DBU                             | THF                | <b>2a</b> | 75             |
| 12 | DBU                             | Acetone            | <b>2a</b> | 85             |
| 13 | DBU                             | Toluene            | <b>2a</b> | 65             |
| 14 | DBU                             | CH <sub>3</sub> CN | <b>2a</b> | 73             |
| 15 | DBU                             | DCM                | <b>2b</b> | - <sup>c</sup> |
| 16 | DBU                             | DCM                | <b>2c</b> | - <sup>c</sup> |

P<sub>2</sub>-<sup>t</sup>Bu = (Me<sub>2</sub>N)<sub>3</sub>P=N-(Et<sub>2</sub>N)<sub>2</sub>P=N-CMe<sub>3</sub>. PMP= 4-MeO-C<sub>6</sub>H<sub>4</sub>.

<sup>a</sup> Reactions were carried out with **1a** (2 equiv.) and **2** (1 equiv.) in the corresponding solvent (0.1 M) and base (1.1 equiv.) at room temperature for 12 h. <sup>b</sup> Isolated yields of **3a**. <sup>c</sup> Complex mixture of products.

#### Preparation of conjugated sulfonyl imine **2c**.

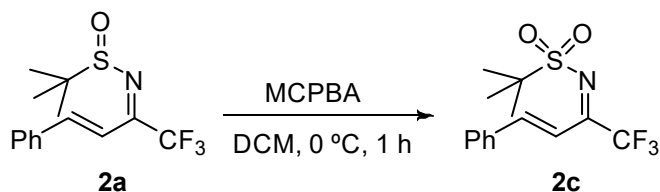

To a 100 mL round bottom flask fitted with a magnetic stirring bar, sulfinyl imine **2a** (303 mg, 1mmol) was dissolved in DCM (30 mL). m-CPBA (344 mg, 2 mmol) was then added and the mixture stirred for 10 min at room temperature. The mixture was quenched with NaHCO<sub>3</sub>, extracted with DCM, dried over Na<sub>2</sub>SO<sub>4</sub> and solvents removed under vacuum. Imine **2c** (303 mg) was obtained in 95% yield as an orange oil, after purification by column chromatography with Hex:EtOAc (4:1) as eluent. M. p. = 83-85 °C. <sup>1</sup>H NMR (300 MHz, CDCl<sub>3</sub>) δ: 7.65 – 7.61 (m, 4H), 7.48 – 7.41 (m, 3H), 1.53 (s, 9H). <sup>19</sup>F NMR (282 MHz, CDCl<sub>3</sub>) δ -66.2. <sup>13</sup>C NMR (75 MHz, CDCl<sub>3</sub>) δ 148.8 (s), 134.0 (s), 132.4 (s), 129.4 (s), 129.4 (s), 119.4 (q, *J* = 283.2 Hz), 116.4 (s), 116.4 (s), 60.3 (s), 23.9 (s).



### Preparation of conjugated imine **2d**.

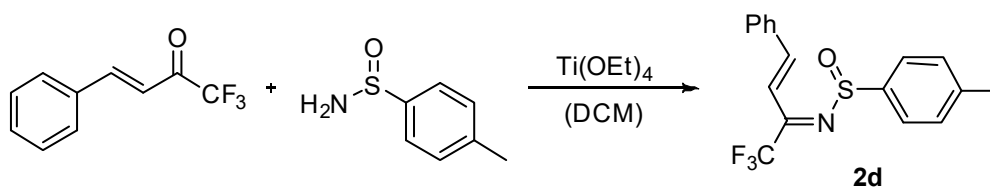

To a stirred solution of 1,1,1-trifluoro-4-phenyl-3-buten-2-one (5 mmol, 1,0 g) and Ti(OEt)<sub>4</sub> (20 mmol, 4,2 mL), p-tolyl sulfonamide (5 mmol, 775 mg) was added, and the neat reaction mixture was stirred at rt for 24h under N<sub>2</sub> atmosphere. The reaction mixture was diluted with 10 mL of DCM and quenched with 20 mL of a saturated NH<sub>4</sub>Cl solution. The formed titanium salts were filtered over a Celite pad and the mixture extracted with more DCM, dried over sodium sulfate and evaporated under vacuum. Imine **2d** (1,35 g) was obtained in 80% as a yellow solid, after purification by column chromatography with Hex:EtOAc (4:1) as eluent. M. p. = 72-74 °C. <sup>1</sup>H NMR (300 MHz, CDCl<sub>3</sub>) δ: 8.08 (dd, *J* = 16.9, 1.4 Hz, 1H), 7.74 – 7.69 (m, 2H), 7.59 (dd, *J* = 6.7, 2.9 Hz, 2H), 7.45 – 7.34 (m, 6H), 2.43 (s, 3H). <sup>19</sup>F NMR (282 MHz, CDCl<sub>3</sub>) δ: -66.3. <sup>13</sup>C NMR (75 MHz, CDCl<sub>3</sub>) δ 157.00 (q, *J* = 33.4 Hz), 144.74 (q, *J* = 2.6 Hz), 142.18, 141.31, 134.73, 131.29, 130.15, 129.19, 128.66, 125.49, 118.98 (q, *J* = 282.2 Hz), 114.98, 21.53.

### Preparation of conjugated imine **2g**.

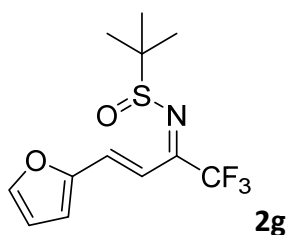

Starting from conjugated ketone 1-(2-furyl)-4,4-dimethyl-3-penten-2-one (890 mg, 5 mmol) and Ellman's reagent (5 mmol, 605 mg) and following the general procedure employed for the preparation of imine **2d**, imine **2g** (1.13 g, 77%) was obtained as an orange oil. <sup>1</sup>H NMR (300 MHz, CDCl<sub>3</sub>) δ 7.86 (dq, *J* = 16.6, 1.7 Hz, 1H), 7.52 (d, *J* = 1.7 Hz, 1H), 7.07 (dq, *J* = 16.6, 1.9 Hz, 1H), 6.70 (d, *J* = 3.5 Hz, 1H), 6.49 (dd, *J* = 3.5, 1.8 Hz, 1H), 1.33 (s, 9H). <sup>19</sup>F NMR (282 MHz, CDCl<sub>3</sub>) δ -66.45. <sup>13</sup>C NMR (75 MHz, CDCl<sub>3</sub>) δ 158.61 (q, *J* = 33.1 Hz), 151.25 (q, *J* = 1.3 Hz), 146.07, 129.83 (q, *J* = 3.0 Hz), 119.16 (q, *J* = 282.0 Hz), 116.69, 113.01, 112.90, 60.67, 23.09.

### Preparation of conjugated imine **2h**.

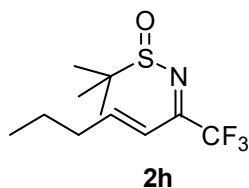

Starting from conjugated ketone 2,2-dimethyl-4-octen-3-one (770 mg, 5 mmol) and Ellman's reagent (5 mmol, 605 mg) and following the general procedure employed for the preparation of imine **2d**, imine **2h** (0.77 g, 57%) was obtained as a yellow oil.  $^1\text{H}$  NMR (300 MHz,  $\text{CDCl}_3$ )  $\delta$  7.24 (dh,  $J = 16.5, 1.6$  Hz, 1H), 6.65 (dtq,  $J = 16.5, 6.9, 2.2$  Hz, 1H), 2.25 (qd,  $J = 7.1, 1.5$  Hz, 2H), 1.51 (h,  $J = 7.4$  Hz, 2H), 1.30 (s, 9H), 0.93 (t,  $J = 7.4$  Hz, 3H).  $^{19}\text{F}$  NMR (282 MHz,  $\text{CDCl}_3$ )  $\delta$  -66.69.  $^{13}\text{C}$  NMR (75 MHz,  $\text{CDCl}_3$ )  $\delta$  159.21 (q,  $J = 32.8$  Hz), 150.09 (q,  $J = 2.3$  Hz), 119.03 (q,  $J = 282.0$  Hz), 118.81, 60.22, 36.22, 23.00, 21.48, 13.74.

### Preparation of conjugated imine **2i**.

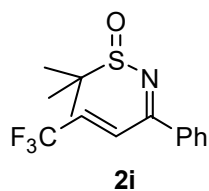

Starting from conjugated ketone 4,4,4-trifluoro-1-phenyl-2-buten-1-one (1 g, 5 mmol) and Ellman's reagent (5 mmol, 605 mg) and following the general procedure employed for the preparation of imine **2d**, imine **2i** (1.24 g, 82%) was obtained as a yellow oil.  $^1\text{H}$  NMR (300 MHz,  $\text{CDCl}_3$ )  $\delta$ : 8.02 (d,  $J = 16.3$  Hz, 1H), 7.79 – 7.40 (m, 5H), 5.99 (dq,  $J = 16.3, 6.3$  Hz, 1H), 1.33 (s, 9H).  $^{19}\text{F}$  NMR (282 MHz,  $\text{CDCl}_3$ )  $\delta$  -64.7.  $^{13}\text{C}$  NMR (75 MHz,  $\text{CDCl}_3$ )  $\delta$  170.5, 137.2, 131.9, 128.8, 127.6 (q,  $J = 35.0$  Hz), 122.5 (q,  $J = 270.5$  Hz), 59.5, 23.0.

### Preparation of polycyclic trifluoroarenes **3**.

#### General procedure A for the cycloaromatization reaction

In a 50 mL round bottom flask fitted with a magnetic stirring bar, the corresponding dicyanoalkene **1** (0.6 mmol), DCM (6 mL) and DBU (0.6 mmol) were loaded. After stirring

the reaction mixture for 5 min at room temperature, a solution of the corresponding sulfinylimine **2** (0.3 mmol) in DCM (3 mL) was added. After stirring for 16 h at rt, the solvents were removed and the crude product purified by means of flash column chromatography.

### General procedure B for the cycloaromatization reaction

In a 50 mL round bottom flask fitted with a magnetic stirring bar, the corresponding sulfinylimine **2** (0.3 mmol), DCM (6 mL) and DBU (0.6 mmol) were loaded. After stirring the reaction mixture for 5 min at room temperature, a solution of the corresponding dicyanoalkene **1** (0.6 mmol) in DCM (3 mL) was slowly added with a syringe pump over 3 h (1 mL/h). After stirring for 3 additional hours at rt, the solvents were removed and the crude product purified by means of flash column chromatography.

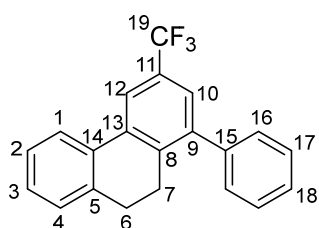

### 1-Phenyl-3-(trifluoromethyl)-9,10-dihydrophenanthrene (**3a**):

Starting from 2-(3,4-dihydronaphthalen-1(2H)-ylidene)malononitrile **1a** (116.5 mg), 2-methyl-N-((2Z,3E)-1,1,1-trifluoro-4-phenylbut-3-en-2-ylidene)propane-2-sulfinamide **2a** (91.0 mg) and DBU (90  $\mu$ L), following the general procedure **A** mentioned above, the titled compound **3a** was obtained as a white solid (85.6 mg, 0.264 mmol, 88%) after purification by column chromatography with Hex:EtOAc (10:1) as eluent. M.p. = 89-91  $^{\circ}$ C.  $^1\text{H}$  NMR (300 MHz,  $\text{CDCl}_3$ )  $\delta$  8.0 (dcd, 1H,  $^4J_{\text{HH}}$  1.9,  $^4J_{\text{FH}}$  0.6,  $^5J_{\text{HH}}$  0.5, Hz, H12), 7.82 (ddt, 1H,  $^3J_{\text{HH}}$  7.5,  $^4J_{\text{HH}}$  1.4,  $^5J_{\text{HH}}$  0.5, Hz, H1), 7.5 (m, 1H, H10), 7.46 (m, 2H, H17), 7.43 (m, 1H, H18), 7.37 (m, 1H, H2), 7.36 (m, 2H, H16), 7.31 (td, 2H,  $^3J_{\text{HH}}$  7.2,  $^4J_{\text{HH}}$  1.4 Hz, H3), 7.26 (m, 1H, H4), 2.85 (m, 2H, H7), 2.77 (m, 2H, H6), ppm.  $^{13}\text{C}\{^1\text{H}\}$  NMR (75.48 MHz,  $\text{CDCl}_3$ )  $\delta$  141.96 (C9), 140.3 (C15), 138.95 (c,  $^2J_{\text{FC}}$  1.4 Hz, C11), 137.53 (C5 + C8), 136.12 (C13), 133.91 (C14), 129.37 (C16), 128.5 (C17), 128.42 (C3), 128.13 (c,  $^1J_{\text{FC}}$  272.3 Hz, C19), 128.11 (C4), 127.74 (C18), 127.38 (C2), 124.44 (C1), 125.59 (c,  $^3J_{\text{FC}}$  3.8 Hz, C10), 120.02 (c,  $^3J_{\text{FC}}$  3.8 Hz, C12), 26.6 (C7), 28.75 (C6) ppm.  $^{19}\text{F}\{^1\text{H}\}$  NMR (282.4 MHz,  $\text{CDCl}_3$ )  $\delta$  -62.4 ppm. HRMS (ES): calculated for (M - H<sub>2</sub> + H<sup>+</sup>) C<sub>21</sub>H<sub>14</sub>F<sub>3</sub>: 323.1048; found 323.1058.

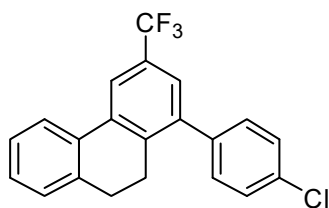

**1-(4-Chlorophenyl)-3-(trifluoromethyl)-9,10-dihydrophenanthrene (3b):**

Starting from 2-(3,4-dihydronaphthalen-1(2H)-ylidene)malononitrile **1a** (116.5 mg), N-((2Z,3E)-4-(4-chlorophenyl)-1,1,1-trifluorobut-3-en-2-ylidene)-2-methylpropane-2-sulfonamide **2e** (101.3 mg) and DBU (90  $\mu$ L), following the general procedure **A** mentioned above, the titled compound **3b** was obtained as a yellowish oil (91.5 mg, 0.255 mmol, 85%) after purification by column chromatography with Hex:EtOAc (10:1) as eluent.  $^1\text{H}$  NMR (500 MHz,  $\text{CDCl}_3$ )  $\delta$ : 7.91 (s, 1H), 7.71 (d,  $J = 7.6$  Hz, 1H), 7.35 – 7.33 (m, 3H), 7.27 (td,  $J = 7.5, 1.0$  Hz, 1H), 7.22 – 7.15 (m, 3H), 2.73 – 2.70 (m, 2H), 2.68 – 2.65 (m, 2H).  $^{19}\text{F}$  NMR (282 MHz,  $\text{CDCl}_3$ )  $\delta$ : -62.4 (s).  $^{13}\text{C}$  NMR (126 MHz,  $\text{CDCl}_3$ )  $\delta$ : 140.6, 138.8, 138.6, 137.3, 136.2, 133.8, 133.6, 130.6, 129.0 (q,  $J = 32.7$  Hz), 128.6, 128.4, 128.0, 127.3, 125.3 (q,  $J = 3.7$  Hz), 124.3, 124.3 (q,  $J = 273.4$  Hz), 120.2 (q,  $J = 3.7$  Hz), 28.6, 26.5. HRMS (ES): calculated for ( $\text{M} - \text{H}_2 + \text{H}^+$ )  $\text{C}_{21}\text{H}_{13}\text{ClF}_3$ : 357.0652; found 357.0655.

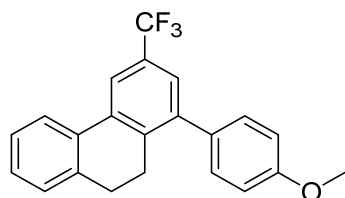

**1-(4-Methoxyphenyl)-3-(trifluoromethyl)-9,10-dihydrophenanthrene (3c):**

Starting from 2-(3,4-dihydronaphthalen-1(2H)-ylidene)malononitrile **1a** (116.5 mg), 2-methyl-N-((2Z,3E)-1,1,1-trifluoro-4-(4-methoxyphenyl)but-3-en-2-ylidene)propane-2-sulfonamide **2f** (100.0 mg) and DBU (90  $\mu$ L), following the general procedure **A** mentioned above, the titled compound **3c** was obtained as a white solid (70.2 mg, 0.198 mmol, 66%) after purification by column chromatography with Hex:EtOAc (10:1) as eluent. M.p. = 89-91  $^\circ\text{C}$ .  $^1\text{H}$  NMR (300 MHz,  $\text{CDCl}_3$ )  $\delta$ : 7.89 (s, 1H), 7.73 (d,  $J = 7.4$  Hz, 1H), 7.40 (s, 1H), 7.28 (ddd,  $J = 13.4, 6.7, 1.6$  Hz, 1H), 7.22 – 7.18 (m, 3H), 6.92 (d,  $J = 8.8$  Hz, 2H), 3.80 (s, 3H), 2.80 – 2.75 (m, 2H), 2.70 – 2.65 (m, 2H).  $^{19}\text{F}$  NMR (282 MHz,  $\text{CDCl}_3$ )  $\delta$ : -62.4 (s).  $^{13}\text{C}$  NMR (75 MHz,  $\text{CDCl}_3$ )  $\delta$ : 159.1, 141.5, 138.9, 137.4, 136.0, 133.9, 132.5, 130.4, 128.8 (q,  $J = 32.2$  Hz), 128.2, 127.9, 127.2, 125.5 (q,  $J = 3.7$  Hz), 124.4 (q,  $J = 272.2$  Hz).

Hz), 124.3, 119.6 (q,  $J = 3.7$  Hz), 113.8, 55.4, 28.7, 26.5. HRMS (ES): calculated for ( $M - H_2 + H^+$ )  $C_{22}H_{16}F_3O$ : 353.1153; found 353.1162.

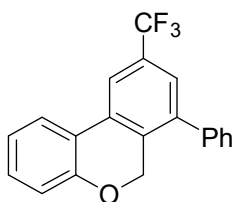

#### 7-Phenyl-9-(trifluoromethyl)-6H-benzo[c]chromene (**3d**):

Starting from 2-(chroman-4-ylidene)malononitrile **1b** (117.7 mg), 2-methyl-N-((2Z,3E)-1,1,1-trifluoro-4-phenylbut-3-en-2-ylidene)propane-2-sulfinamide **2a** (91.0 mg) and DBU (90  $\mu$ L), following the general procedure **A** mentioned above, the titled compound **3d** was obtained as a colourless solid (88.1 mg, 0.27 mmol, 90%) after purification by column chromatography with Hex:EtOAc (10:1) as eluent. M.p. = 73-75  $^{\circ}$ C.  $^1H$  NMR (500 MHz,  $CDCl_3$ )  $\delta$ : 7.86 (s, 1H), 7.74 (dd,  $J = 7.8, 1.4$  Hz, 1H), 7.45 (br s, 1H), 7.45 – 7.42 (m, 3H), 7.25 – 7.21 (m, 3H), 7.05 (td,  $J = 7.7, 1.0$  Hz, 1H), 6.94 – 6.92 (m, 1H), 5.02 (s, 2H).  $^{19}F$  NMR (282 MHz,  $CDCl_3$ )  $\delta$ : -62.6 (s).  $^{13}C$  NMR (126 MHz,  $CDCl_3$ )  $\delta$ : 154.9, 140.1, 138.3, 132.7, 131.7, 130.4, 130.4 (q,  $J = 32.4$  Hz), 128.9, 128.7, 128.2, 125.6 (q,  $J = 3.7$  Hz), 124.1 (q,  $J = 273.4$  Hz), 123.8, 122.6, 122.3, 118.1 (q,  $J = 3.8$  Hz), 117.4, 66.1. HRMS (ES): calculated for ( $M + H^+$ )  $C_{20}H_{14}F_3O$ : 327.0997; found 327.0995.

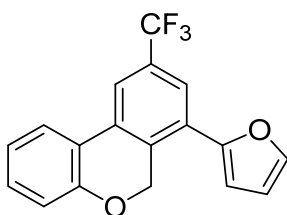

#### 7-(Furan-2-yl)-9-(trifluoromethyl)-6H-benzo[c]chromene (**3e**):

Starting from 2-(chroman-4-ylidene)malononitrile **1b** (117.7 mg), 2-methyl-N-((2Z,3E)-1,1,1-trifluoro-4-(furan-2-yl)but-3-en-2-ylidene)propane-2-sulfinamide **2g** (87.9 mg) and DBU (90  $\mu$ L), following the general procedure **A** mentioned above, the titled compound **3e** was obtained as a white solid (75.8 mg, 0.24 mmol, 80%) after purification by column chromatography with Hex:EtOAc (10:1) as eluent. M.p. = 79-81  $^{\circ}$ C.  $^1H$  NMR (300 MHz,  $CDCl_3$ )  $\delta$  7.87 (d,  $J = 1.8$  Hz, 1H), 7.82 (dd,  $J = 1.8, 0.8$  Hz, 1H), 7.76 (dd,  $J = 7.7, 1.6$  Hz, 1H), 7.59 (dd,  $J = 1.8, 0.8$  Hz, 1H), 7.31 (ddd,  $J = 8.1, 7.4, 1.6$  Hz, 1H), 7.11 (td,  $J =$

7.5, 1.3 Hz, 1H), 7.03 (dd,  $J = 8.1, 1.2$  Hz, 1H), 6.57 (dd,  $J = 3.4, 1.8$  Hz, 1H), 6.53 (dd,  $J = 3.4, 0.8$  Hz, 1H), 5.39 (s, 1H).  $^{19}\text{F}$  NMR (282 MHz,  $\text{CDCl}_3$ )  $\delta$  -62.84.  $^{13}\text{C}$  NMR (75 MHz,  $\text{CDCl}_3$ )  $\delta$  154.85, 151.03, 143.48, 132.10, 132.06 (q,  $J = 1.2$  Hz), 130.75 (q,  $J = 32.6$  Hz), 130.61, 128.56, 124.09 (q,  $J = 272.3$  Hz), 123.89, 123.36 (q,  $J = 3.9$  Hz), 122.70, 122.15, 118.39 (q,  $J = 3.7$  Hz), 117.53, 111.97, 110.29, 66.08. HRMS (ES): calculated for ( $\text{M} + \text{H}^+$ )  $\text{C}_{18}\text{H}_{12}\text{F}_3\text{O}_2$ : 317.0789; found 317.0798.

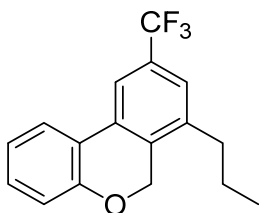

### 7-Propyl-9-(trifluoromethyl)-6H-benzo[c]chromene (3f):

Starting from 2-(chroman-4-ylidene)malononitrile **1b** (117.7 mg), 2-methyl-*N*-((2Z,3E)-1,1,1-trifluorohept-3-en-2-ylidene)propane-2-sulfinamide **2h** (81.3 mg) and DBU (90  $\mu\text{L}$ ), following the general procedure **A** mentioned above, the titled compound **3f** was obtained as a white solid (38.7 mg, 0.13 mmol, 44%) after purification by column chromatography with Hex:EtOAc (10:1) as eluent. M.p. = 50-52  $^{\circ}\text{C}$ .  $^1\text{H}$  NMR (300 MHz,  $\text{CDCl}_3$ )  $\delta$  7.79 (s, 1H), 7.75 (dd,  $J = 7.8, 1.6$  Hz, 1H), 7.37 (s, 1H), 7.28 (ddd,  $J = 8.1, 7.4, 1.6$  Hz, 1H), 7.09 (td,  $J = 7.6, 1.2$  Hz, 1H), 7.01 (dd,  $J = 8.1, 1.2$  Hz, 1H), 5.18 (s, 2H), 2.70 – 2.60 (m, 2H), 1.70 – 1.53 (m, 2H), 1.00 (t,  $J = 7.3$  Hz, 3H).  $^{19}\text{F}$  NMR (282 MHz,  $\text{CDCl}_3$ )  $\delta$  -62.66.  $^{13}\text{C}$  NMR (75 MHz,  $\text{CDCl}_3$ )  $\delta$  154.73, 139.11, 133.30 (q,  $J = 1.4$  Hz), 131.26, 130.40 (q,  $J = 32.1$  Hz), 130.30, 125.29 (q,  $J = 3.8$  Hz), 124.35 (q,  $J = 272.5$  Hz), 123.82, 122.60, 122.34, 117.44, 116.99 (q,  $J = 3.9$  Hz), 65.25, 34.65, 23.95, 13.97. HRMS (ES): calculated for ( $\text{M} + \text{H}^+$ )  $\text{C}_{17}\text{H}_{16}\text{F}_3\text{O}$ : 294.1187; found 294.1180.

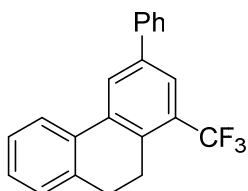

### 3-Phenyl-1-(trifluoromethyl)-9,10-dihydrophenanthrene (3g):

Starting from 2-(3,4-dihydronaphthalen-1(2H)-ylidene)malononitrile **1a** (116.5 mg), 2-methyl-*N*-((1E,2E)-4,4,4-trifluoro-1-phenylbut-2-en-1-ylidene)propane-2-sulfinamide **2i**

(93.4 mg) and DBU (90  $\mu$ L), following the general procedure **A** mentioned above, the titled compound **3g** was obtained as a white solid (38.9 mg, 0.120 mmol, 40%) after purification by column chromatography with Hex:EtOAc (10:1) as eluent. M. p. = 111–112  $^{\circ}$ C.  $^1\text{H}$  NMR (300 MHz,  $\text{CDCl}_3$ )  $\delta$  8.14 (d,  $J$  = 1.3 Hz, 1H), 7.85 – 7.77 (m, 2H), 7.71 – 7.61 (m, 2H), 7.56 – 7.45 (m, 2H), 7.46 – 7.27 (m, 4H), 3.24 – 3.03 (m, 2H), 2.97 – 2.87 (m, 2H).  $^{19}\text{F}$  NMR (282 MHz,  $\text{CDCl}_3$ )  $\delta$  -60.1.  $^{13}\text{C}$  NMR (75 MHz,  $\text{CDCl}_3$ )  $\delta$  140.2, 139.9, 137.5, 137.0, 135.2 (q,  $J$  = 1.69 Hz), 133.7, 129.1, 128.7, 128.4, 128.1, 128.0, 127.4, 127.2, 126.3, 124.7 (q,  $J$  = 275.0 Hz), 124.4, 123.6 (q,  $J$  = 5.7 Hz), 28.4, 24.9 (q,  $J$  = 2.3 Hz). HRMS (ES): calculated for ( $\text{M} - \text{H}_2 + \text{H}^+$ )  $\text{C}_{21}\text{H}_{14}\text{F}_3$ : 323.1048; found 323.1056.

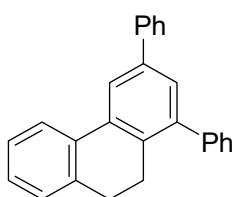

#### 1,3-Diphenyl-9,10-dihydrophenanthrene (**3h**):

Starting from 2-(3,4-dihydronaphthalen-1(2H)-ylidene)malononitrile **1a** (116.5 mg), N-((1Z,2E)-1,3-diphenylallylidene)-2-methylpropane-2-sulfinamide **2j** (93.4 mg) and DBU (90  $\mu$ L), following the general procedure **A** mentioned above, the titled compound **3h** was obtained as a yellowish oil (40.9 mg, 0.123 mmol, 41%) after purification by column chromatography with Hex:EtOAc (10:1) as eluent.  $^1\text{H}$  NMR (300 MHz,  $\text{CDCl}_3$ )  $\delta$ : 7.92 (d,  $J$  = 1.8 Hz, 1H), 7.78 (d,  $J$  = 7.6 Hz, 1H), 7.61 – 7.58 (m, 2H), 7.41 – 7.14 (m, 12H), 2.79 – 2.74 (m, 2H), 2.71 – 2.66 (m, 2H).  $^{13}\text{C}$  NMR (75 MHz,  $\text{CDCl}_3$ )  $\delta$ : 141.6, 141.4, 141.2, 139.4, 137.6, 135.6, 134.9, 134.2, 129.4, 128.8, 128.2, 128.0, 127.9, 127.6, 127.3, 127.2, 127.1, 127.0, 124.2, 122.1, 29.2, 26.3. HRMS (ES): calculated for ( $\text{M} - \text{H}_2 + \text{H}^+$ )  $\text{C}_{21}\text{H}_{19}$ : 331.1487; found 331.1489.

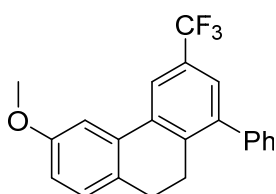

#### 6-Methoxy-1-phenyl-3-(trifluoromethyl)-9,10-dihydrophenanthrene (**3i**):

Starting from 2-(7-methoxy-3,4-dihydronaphthalen-1(2H)-ylidene)malononitrile **1c** (134.6 mg), 2-methyl-N-((2Z,3E)-1,1,1-trifluoro-4-phenylbut-3-en-2-ylidene)propane-2-

sulfonamide **2a** (91.0 mg) and DBU (90  $\mu$ L), following the general procedure **A** mentioned above, the titled compound **3i** was obtained as a yellowish solid (97.8 mg, 0.276 mmol, 92%) after purification by column chromatography with Hex:EtOAc (10:1) as eluent. M.p. = 80-82  $^{\circ}$ C.  $^1\text{H}$  NMR (500 MHz,  $\text{CDCl}_3$ )  $\delta$ : 7.97 (br s, 1H), 7.51 (br s, 1H), 7.49 – 7.46 (m, 2H), 7.44 – 7.40 (m, 1H), 7.37 – 7.35 (m, 3H), 7.18 (d,  $J$  = 8.2 Hz, 1H), 6.87 (dd,  $J$  = 8.2, 2.6 Hz, 1H), 3.91 (s, 3H), 2.85 – 2.82 (m, 2H), 2.72 – 2.69 (m, 2H).  $^{19}\text{F}$  NMR (282 MHz,  $\text{CDCl}_3$ )  $\delta$ : -62.4 (s).  $^{13}\text{C}$  NMR (126 MHz,  $\text{CDCl}_3$ )  $\delta$ : 158.9, 141.9, 140.2, 136.0, 134.7, 129.7, 129.2, 128.8, 128.8 (q,  $J$  = 32.7 Hz), 128.4, 127.6, 125.6 (q,  $J$  = 3.7 Hz), 124.4 (q,  $J$  = 273.4 Hz), 119.9 (q,  $J$  = 3.7 Hz), 113.69, 110.01, 55.55, 27.75, 26.84. HRMS (ES): calculated for ( $\text{M} - \text{H}_2 + \text{H}^+$ )  $\text{C}_{22}\text{H}_{16}\text{F}_3\text{O}$ : 353.1153; found 353.1152.

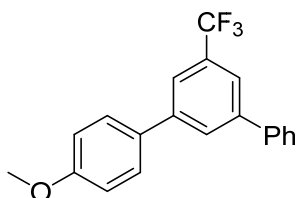

#### 4-Methoxy-5'-(trifluoromethyl)-1,1':3',1''-terphenyl (**3k**):

Starting from 2-(1-(4-methoxyphenyl)ethylidene)malononitrile **1e** (118.9 mg), 2-methyl-N-((2Z,3E)-1,1,1-trifluoro-4-phenylbut-3-en-2-ylidene)propane-2-sulfonamide **2a** (91.0 mg) and DBU (90  $\mu$ L), following the general procedure **B** mentioned above, the titled compound **3k** was obtained as a white solid (60.1 mg, 0.183 mmol, 61%) after purification by column chromatography with Hex:EtOAc (10:1) as eluent. M. p. = 84-86  $^{\circ}$ C.  $^1\text{H}$  NMR (500 MHz,  $\text{CDCl}_3$ )  $\delta$ : 7.92 (s, 1H), 7.77 (br s, 2H), 7.65 (d,  $J$  = 7.1 Hz, H), 7.60 (d,  $J$  = 8.8 Hz, 2H), 7.50 (t,  $J$  = 7.5 Hz, 2H), 7.42 (t,  $J$  = 7.4 Hz, 1H), 7.03 (d,  $J$  = 8.8 Hz, 2H), 3.88 (s, 3H).  $^{19}\text{F}$  NMR (471 MHz,  $\text{CDCl}_3$ )  $\delta$ : -62.5.  $^{13}\text{C}$  NMR (126 MHz,  $\text{CDCl}_3$ )  $\delta$ : 159.8, 142.6, 142.2, 139.9, 132.2, 131.6 (q,  $J$  = 32.0 Hz), 129.0, 128.8, 128.4, 128.1, 127.3, 124.3 (q,  $J$  = 273.4 Hz), 122.3 (q,  $J$  = 3.7 Hz), 122.1 (q,  $J$  = 3.8 Hz), 114.5, 55.4. HRMS (ES): calculated for ( $\text{M} + \text{H}^+$ )  $\text{C}_{20}\text{H}_{16}\text{F}_3\text{O}$ : 329.1153; found 329.1156.

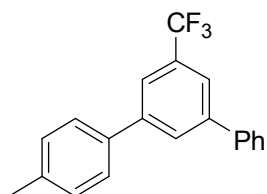

#### 4-Methyl-5'-(trifluoromethyl)-1,1':3',1''-terphenyl (**3l**):



Starting from 2-(1-(p-tolyl)ethylidene)malononitrile **1f** (109.3 mg), 2-methyl-N-((2Z,3E)-1,1,1-trifluoro-4-phenylbut-3-en-2-ylidene)propane-2-sulfonamide **2a** (91.0 mg) and DBU (90  $\mu$ L), following the general procedure **B** mentioned above, the titled compound **3l** was obtained as a white solid (75.9 mg, 0.243 mmol, 81%) after purification by column chromatography with Hex:EtOAc (10:1) as eluent. M. p. = 83-85 °C.  $^1\text{H}$  NMR (500 MHz,  $\text{CDCl}_3$ )  $\delta$ : 7.96 (s, 0H), 7.80 (d,  $J$  = 5.1 Hz, 1H), 7.66 (d,  $J$  = 7.2 Hz, 1H), 7.56 (d,  $J$  = 8.1 Hz, 1H), 7.50 (t,  $J$  = 7.6 Hz, 1H), 7.43 (t,  $J$  = 7.4 Hz, 0H), 7.31 (d,  $J$  = 8.0 Hz, 1H), 2.44 (s, 1H).  $^{19}\text{F}$  NMR (471 MHz,  $\text{CDCl}_3$ )  $\delta$ : -62.5.  $^{13}\text{C}$  NMR (126 MHz,  $\text{CDCl}_3$ )  $\delta$ : 142.6, 142.6, 139.9, 138.1, 136.9, 131.7 (q,  $J$  = 32.0 Hz), 129.8, 129.1, 129.0, 128.1, 127.3, 127.1, 124.3 (q,  $J$  = 272.6 Hz), 122.5 (dq,  $J$  = 7.6, 3.8 Hz), 21.2. HRMS (ES): calculated for ( $\text{M} + \text{H}^+$ )  $\text{C}_{20}\text{H}_{16}\text{F}_3$ : 313.1204; found 313.1210.

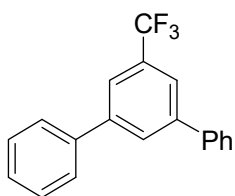

#### 5'-(Trifluoromethyl)-1,1':3',1''-terphenyl (**3m**):

Starting from 2-(1-phenylethylidene)malononitrile **1g** (100.9 mg), 2-methyl-N-((2Z,3E)-1,1,1-trifluoro-4-phenylbut-3-en-2-ylidene)propane-2-sulfonamide **2a** (91.0 mg) and DBU (90  $\mu$ L), following the general procedure **B** mentioned above, the titled compound **3m** was obtained as a colorless solid (69.8 mg, 0.234 mmol, 78%) after purification by column chromatography with Hex:EtOAc (10:1) as eluent. M. p. = 80-82 °C.  $^1\text{H}$  NMR (500 MHz,  $\text{CDCl}_3$ )  $\delta$ : 7.98 (s, 1H), 7.83 (s, 1H), 7.68 – 7.66 (m, 2H), 7.51 (t,  $J$  = 7.5 Hz, 2H), 7.43 (t,  $J$  = 7.4 Hz, 1H).  $^{19}\text{F}$  NMR (471 MHz,  $\text{CDCl}_3$ )  $\delta$ : -62.5 (s).  $^{13}\text{C}$  NMR (126 MHz,  $\text{CDCl}_3$ )  $\delta$ : 142.7, 139.8, 131.7 (q,  $J$  = 32.1 Hz), 129.3, 129.1, 128.2, 127.3, 124.2 (q,  $J$  = 272.7 Hz), 122.8 (q,  $J$  = 3.7 Hz). HRMS (ES): calculated for ( $\text{M} + \text{H}^+$ )  $\text{C}_{19}\text{H}_{14}\text{F}_3$ : 299.1048; found 299.2052.

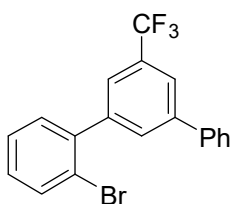

#### 2-Bromo-5'-(trifluoromethyl)-1,1':3',1''-terphenyl (**3n**):

Starting from 2-(1-(2-bromophenyl)ethylidene)malononitrile **1h** (148.3 mg), 2-methyl-N-((2Z,3E)-1,1,1-trifluoro-4-phenylbut-3-en-2-ylidene)propane-2-sulfinamide **2a** (91.0 mg) and DBU (90  $\mu$ L), following the general procedure **B** mentioned above, the titled compound **3n** was obtained as a colorless oil (80.3 mg, 0.213 mmol, 78%) after purification by column chromatography with Hex:EtOAc (10:1) as eluent.  $^1\text{H}$  NMR (500 MHz,  $\text{CDCl}_3$ )  $\delta$ : 7.85 (d,  $J$  = 9.2 Hz, 2H), 7.72 (d,  $J$  = 8.6 Hz, 1H), 7.66 – 7.64 (m, 3H), 7.49 (t,  $J$  = 7.6 Hz, 2H), 7.43 – 7.38 (m, 3H), 7.29 – 7.25 (m, 1H).  $^{19}\text{F}$  NMR (471 MHz,  $\text{CDCl}_3$ )  $\delta$ : -62.4 (s).  $^{13}\text{C}$  NMR (126 MHz,  $\text{CDCl}_3$ )  $\delta$ : 142.2, 141.8, 141.0, 139.5, 133.4, 131.6, 131.1 (q,  $J$  = 33.8 Hz), 131.2, 129.5, 129.0, 128.2, 127.7, 127.3, 125.0 (q,  $J$  = 3.8 Hz), 124.1 (q,  $J$  = 272.6 Hz), 123.1 (q,  $J$  = 3.8 Hz), 122.5. HRMS (ES): calculated for ( $\text{M} + \text{H}^+$ )  $\text{C}_{19}\text{H}_{13}\text{BrF}_3$ : 377.0153; found 377.0152.

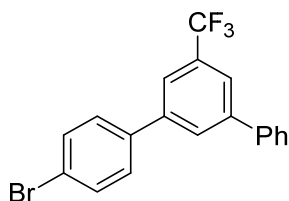

#### 4-Bromo-5'-(trifluoromethyl)-1,1':3',1''-terphenyl (**3o**):

Starting from 2-(1-(4-bromophenyl)ethylidene)malononitrile **1i** (148.3 mg), 2-methyl-N-((2Z,3E)-1,1,1-trifluoro-4-phenylbut-3-en-2-ylidene)propane-2-sulfinamide **2a** (91.0 mg) and DBU (90  $\mu$ L), following the general procedure **B** mentioned above, the titled compound **3o** was obtained as a colourless solid (55.5 mg, 0.147 mmol, 49%) after purification by column chromatography with Hex:EtOAc (10:1) as eluent. M. p. = 78-80  $^{\circ}\text{C}$ .  $^1\text{H}$  NMR (500 MHz,  $\text{CDCl}_3$ )  $\delta$ : 7.92 (s, 1H), 7.83 (s, 1H), 7.77 (s, 1H), 7.65 – 7.62 (m, 4H), 7.53 – 7.49 (m, 4H), 7.43 (t,  $J$  = 7.3 Hz, 1H).  $^{19}\text{F}$  NMR (471 MHz,  $\text{CDCl}_3$ )  $\delta$ : -62.5 (s).  $^{13}\text{C}$  NMR (126 MHz,  $\text{CDCl}_3$ )  $\delta$ : 142.9, 141.4, 139.6, 138.7, 132.2, 131.9 (q,  $J$  = 32.2 Hz), 129.1, 129.0, 128.9, 128.3, 127.3, 124.1 (q,  $J$  = 273.4 Hz), 123.1 (q,  $J$  = 3.7 Hz), 122.6, 122.5 (q,  $J$  = 3.7 Hz). HRMS (ES): calculated for ( $\text{M} + \text{H}^+$ )  $\text{C}_{19}\text{H}_{13}\text{BrF}_3$ : 377.0153; found 377.0158.

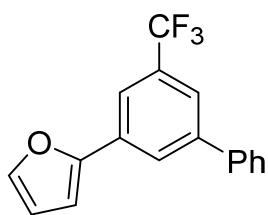

### 2-(5-(Trifluoromethyl)-[1,1'-biphenyl]-3-yl)furan (**3p**)

Starting from 3-(furan-2-yl)-2-isocyano-2-butenenitrile **1j** (95 mg), 2-methyl-N-((2Z,3E)-1,1,1-trifluoro-4-phenylbut-3-en-2-ylidene)propane-2-sulfinamide **2a** (91.0 mg) and DBU (90  $\mu$ L), following the general procedure **A** mentioned above, the titled compound **3p** was obtained as a white solid (45 mg, 0.12 mmol, 52%) after purification by column chromatography with Hex:EtOAc (10:1) as eluent. M. p. = 57 – 59  $^{\circ}$ C.  $^1\text{H}$  NMR (300 MHz,  $\text{CDCl}_3$ )  $\delta$  8.05 (t,  $J$  = 1.7 Hz, 1H), 7.89 (td,  $J$  = 1.7, 0.8 Hz, 1H), 7.71 (td,  $J$  = 1.7, 0.8 Hz, 1H), 7.68 – 7.61 (m, 2H), 7.56 – 7.46 (m, 3H), 7.46 – 7.39 (m, 1H), 6.80 (dd,  $J$  = 3.4, 0.8 Hz, 1H), 6.53 (dd,  $J$  = 3.4, 1.8 Hz, 1H).  $^{19}\text{F}$  NMR (282 MHz,  $\text{CDCl}_3$ )  $\delta$  -62.75.  $^{13}\text{C}$  NMR (75 MHz,  $\text{CDCl}_3$ )  $\delta$  152.63, 143.03, 142.75, 139.74, 132.18, 131.87 (q,  $J$  = 32.3 Hz), 129.16, 128.36, 127.36, 125.59 (q,  $J$  = 1.0 Hz), 124.21 (q,  $J$  = 272.6 Hz) 122.69 (q,  $J$  = 3.8 Hz), 119.43 (q,  $J$  = 3.9 Hz), 112.09, 106.70. HRMS (ES): calculated for ( $\text{M} + \text{H}^+$ )  $\text{C}_{17}\text{H}_{12}\text{F}_3\text{O}$ : 289.0840; found 289.0850.

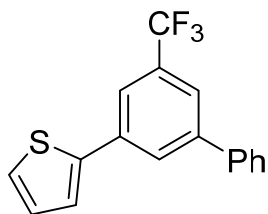

### 2-(5-(Trifluoromethyl)-[1,1'-biphenyl]-3-yl)thiophene (**3q**)

Starting from 2-isocyano-3-(thiophen-2-yl)but-2-enenitrile **1k** (104 mg), 2-methyl-N-((2Z,3E)-1,1,1-trifluoro-4-phenylbut-3-en-2-ylidene)propane-2-sulfinamide **2a** (91.0 mg) and DBU (90  $\mu$ L), following the general procedure **A** mentioned above, the titled compound **3q** was obtained as a white solid (52 mg, 0.12 mmol, 57%) after purification by column chromatography with Hex:EtOAc (10:1) as eluent. M. p. = 67 – 69  $^{\circ}$ C.  $^1\text{H}$  NMR (300 MHz,  $\text{CDCl}_3$ )  $\delta$  7.97 (t,  $J$  = 1.8 Hz, 1H), 7.83 (td,  $J$  = 1.7, 0.8 Hz, 1H), 7.74 (td,  $J$  = 1.7, 0.8 Hz, 1H), 7.68 – 7.60 (m, 2H), 7.55 – 7.41 (m, 4H), 7.37 (dd,  $J$  = 5.1, 1.2 Hz, 1H), 7.14 (dd,  $J$  = 5.1, 3.6 Hz, 1H).  $^{19}\text{F}$  NMR (282 MHz,  $\text{CDCl}_3$ )  $\delta$  -62.65.  $^{13}\text{C}$  NMR (75 MHz,  $\text{CDCl}_3$ )  $\delta$  143.01, 142.77, 139.66, 135.88, 132.00 (q,  $J$  = 32.3 Hz), 129.19, 128.43, 128.41, 127.98

(q,  $J = 1.4$  Hz), 127.39, 126.12, 124.48, 124.17 (q,  $J = 272.6$  Hz), 122.93 (q,  $J = 3.7$  Hz), 121.48 (q,  $J = 3.8$  Hz). HRMS (ES): calculated for ( $M + H^+$ )  $C_{17}H_{12}F_3S$ : 305.0612; found 305.0615.

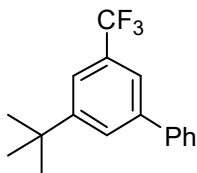

### 3-(*tert*-Butyl)-5-(trifluoromethyl)-1,1'-biphenyl (**3r**):

Starting from 2-isocyano-3,4,4-trimethyl-2-pentenenitrile **1l** (89 mg), 2-methyl-N-((2*Z*,3*E*)-1,1,1-trifluoro-4-phenylbut-3-en-2-ylidene)propane-2-sulfinamide **2a** (91.0 mg) and DBU (90  $\mu$ L), following the general procedure **A** mentioned above, the titled compound **3r** was obtained as a colourless oil (33.4 mg, 0.12 mmol, 40%) after purification by column chromatography with Hex:EtOAc (10:1) as eluent.  $^1H$  NMR (300 MHz,  $CDCl_3$ )  $\delta$  7.77 (t,  $J = 1.8$  Hz, 1H), 7.68 – 7.56 (m, 4H), 7.52 – 7.44 (m, 2H), 7.43 – 7.36 (m, 1H), 1.41 (s, 9H).  $^{19}F$  NMR (282 MHz,  $CDCl_3$ )  $\delta$  -62.30.  $^{13}C$  NMR (75 MHz,  $CDCl_3$ )  $\delta$  152.77, 141.97, 140.61, 130.98 (q,  $J = 31.6$  Hz), 129.07, 128.00, 127.90 (q,  $J = 1.4$  Hz), 127.47, 124.58 (q,  $J = 272.5$  Hz), 121.46 (q,  $J = 3.8$  Hz), 121.04 (q,  $J = 3.8$  Hz), 35.21, 31.41. HRMS (ES): calculated for ( $M + H^+$ )  $C_{17}H_{18}F_3$ : 279.1361; found 279.1357.

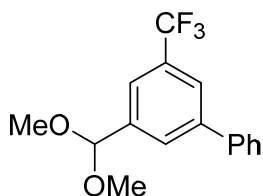

### 3-(Dimethoxymethyl)-5-(trifluoromethyl)-1,1'-biphenyl (**3s**):

Starting from (*Z*)-2-isocyano-4,4-dimethoxy-3-methyl-2-butenenitrile **1m** (89 mg), 2-methyl-N-((2*Z*,3*E*)-1,1,1-trifluoro-4-phenylbut-3-en-2-ylidene)propane-2-sulfinamide **2a** (91.0 mg) and DBU (90  $\mu$ L), following the general procedure **A** mentioned above, the titled compound **3s** was obtained as a colourless oil (26.8 mg, 0.09 mmol, 30%) after purification by column chromatography with Hex:EtOAc (10:1) as eluent.  $^1H$  NMR (500 MHz,  $CDCl_3$ )  $\delta$  7.87 (t,  $J = 1.7$  Hz, 1H), 7.80 (t,  $J = 1.8$  Hz, 1H), 7.71 (t,  $J = 1.7$  Hz, 1H), 7.64 – 7.60 (m, 2H), 7.50 – 7.44 (m, 2H), 7.43 – 7.38 (m, 1H), 5.50 (s, 1H), 3.37 (s, 6H).  $^{19}F$  NMR (471 MHz,  $CDCl_3$ )  $\delta$  -62.48.  $^{13}C$  NMR (126 MHz,  $CDCl_3$ )  $\delta$  142.25, 139.97, 139.71, 131.38

(q,  $J = 32.4$  Hz), 129.14, 128.94, 128.27, 127.39, 124.11 (q,  $J = 3.7$  Hz), 124.28 (d,  $J = 272.5$  Hz), 122.64 (q,  $J = 3.8$  Hz), 102.29, 52.92. HRMS (ES): calculated for ( $M + H^+$ )  $C_{16}H_{16}F_3O_2$ : 297.1102; found 297.1108.

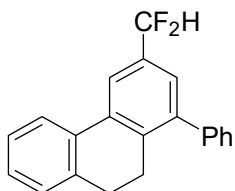

### 3-(Difluoromethyl)-1-phenyl-9,10-dihydrophenanthrene (**3u**):

Starting from 2-(3,4-dihydronaphthalen-1(2H)-ylidene)malononitrile **1a** (116.5 mg), *N*-((2*Z*,3*E*)-1,1-difluoro-4-phenylbut-3-en-2-ylidene)-2-methylpropane-2-sulfinamide **2k** (85.6 mg) and DBU (90  $\mu$ L), following the general procedure **A** mentioned above, the titled compound **3u** was obtained as a yellowish oil (56.1 mg, 0.183 mmol, 61%) after purification by column chromatography with Hex:EtOAc (10:1) as eluent.  $^1H$  NMR (300 MHz,  $CDCl_3$ )  $\delta$ : 7.82 (s, 1H), 7.74 (d,  $J = 8.4$  Hz, 1H), 7.41 – 7.15 (m, 9H), 6.65 (t,  $J = 56.6$  Hz, 1H), 2.78 – 2.73 (m, 2H), 2.70 – 2.65 (m, 2H).  $^{19}F$  NMR (282 MHz,  $CDCl_3$ )  $\delta$ : -110.2 (dt,  $J = 56.7, 1.2$  Hz).  $^{13}C$  NMR (75 MHz,  $CDCl_3$ )  $\delta$ : 141.7, 140.6, 137.7, 137.4, 135.8, 134.1, 132.6 (t,  $J = 22.4$  Hz), 129.3, 128.3, 128.0, 127.9, 127.4, 127.2, 126.0 (t,  $J = 6.0$  Hz), 124.3, 120.3 (t,  $J = 6.0$  Hz), 114.9 (t,  $J = 238.8$  Hz), 28.8, 26.5. HRMS (ES): calculated for ( $M - H_2 + H^+$ )  $C_{21}H_{15}F_2$ : 305.1142; found 305.1152.

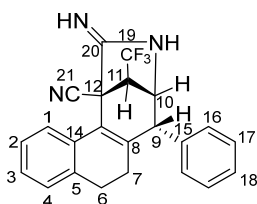

**(1*S*\*,4*S*\*,5*S*\*,12*R*\*)-2-imino-5-phenyl-12-(trifluoromethyl)-2,3,4,5-tetrahydro-1H-1,4-methanonaphtho[1,2-d]azepine-1-carbonitrile (**4**)**. In a 50 mL round bottom flask fitted with a magnetic stirring bar, sulfinylimine **2g** (106 mg, 0.3 mmol), DCM (6 mL) and DBU (90  $\mu$ L, 0.6 mmol) were loaded. After stirring the reaction mixture for 5 min at room temperature, a solution of the corresponding dicyanoalkene **1a** (116.5 mg, 0.6 mmol) in DCM (3 mL) was slowly added with a syringe pump over 3 h (1 mL/h). After stirring over night, the solvents were removed and the crude product purified by means of flash

column chromatography to afford the title compound **8** (71 mg, 60%; together with 29 mg of **3a**) as a light yellow oil.  $^1\text{H}$  NMR (300 MHz,  $\text{CDCl}_3$ )  $\delta$  7.84 (bd, 1H,  $^3J_{\text{HH}}$  7.7 Hz, H1), 7.36 (m, 2H, H17), 7.33 (m, 1H, H2), 7.30 (m, 1H, H3), 7.26 (m, 2H, H4 + H18), 7.17 (m, 2H, H16), 4.38 (cd, 1H,  $^3J_{\text{FH}}$  7.3,  $^3J_{\text{HH}}$  4.1 Hz, H11), 3.98 (m, 1H, H9), 3.55 (dd,  $^3J_{\text{HH}}$  4.2 and 2.9 Hz, H10), 2.89 (m, 1H, H6<sup>a</sup>), 2.81 (m, 1H, H6<sup>e</sup>), 2.19 (m, 1H, H7<sup>e</sup>), 2.16 (m, 1H, H7<sup>a</sup>) ppm.  $^{13}\text{C}\{^1\text{H}\}$  NMR (75.48 MHz,  $\text{CDCl}_3$ )  $\delta$  163.85 (C20), 147.66 (C8), 139.71 (C15), 136.68 (C5), 130.04 (C14), 129.53 (C13), 129.49 (C17), 129.08 (C4), 128.53 (C18), 128.04 (C3), 127.44 (C16), 127.21 (C2), 125.32 (c,  $^1J_{\text{FC}}$  280.5 Hz, C19), 121.93 (C1), 118.43 (c,  $^4J_{\text{FC}}$  25.4 Hz, C21), 75.63 (c,  $^2J_{\text{FC}}$  4.1 Hz, C11), 61.0 (C9), 59.84 (c,  $^3J_{\text{FC}}$  1.6 Hz, C10), 58.77 (C12), 28.25 (C6), 23.71 (C7) ppm.  $^{19}\text{F}\{^1\text{H}\}$  NMR (282.4 MHz,  $\text{CDCl}_3$ )  $\delta$  -76.0 ppm. HRMS (ESI) calcd. for  $\text{C}_{23}\text{H}_{19}\text{F}_3\text{N}_3$ : 394.1519; calcd: 394.1526. The superscripts a/e stand for axial/equatorial.

The structural assignment of compound **4** was based on the analysis of the 1D ( $^1\text{H}$ ,  $^{13}\text{C}$ ,  $^{19}\text{F}$ ) and 2D (COSY, HSQC-edited, HMBC NOESY) set of NMR spectra. The identification of the dihydronaphthalene (**A**) and phenyl (**B**) fragments was straightforward. The three proton spin systems present in these fragments are easily recognizable in the COSY spectrum (Fig. S1, blue arrows). The correlations observed in the HMBC spectrum for the methylenic protons of **A** ( $\delta$  2.89, 2.81, H6 and  $\delta$  2.16, 2.19, H7 ppm, red arrows) confirmed the connectivity in this substructure and allowed to assign all the quaternary carbons. In addition, the correlation of H4 ( $\delta$  7.26 ppm) with C6 ( $\delta$  28.25 ppm) provided the reference for the sequence of assignment of the aromatic protons.

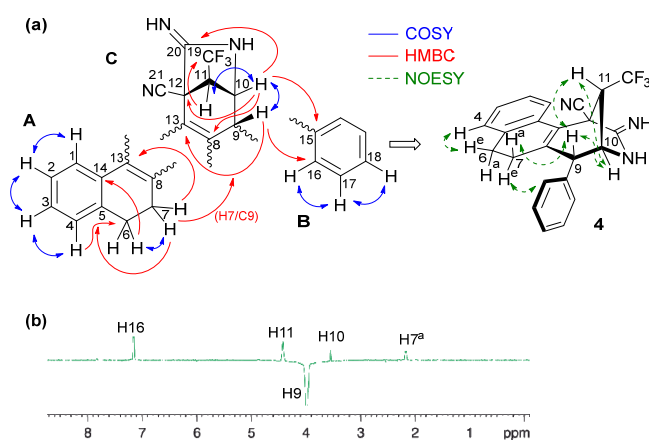

**Figure S1.** (a) Selected correlations observed in the 2D COSY, HMBC and NOESY NMR spectra of **8** including the numbering scheme used. (b) Row extracted from the 2D NOESY spectrum showing the NOEs of H9.

The same assignment strategy afforded the structure of the azabicyclo[3.2.1]octene system **C**. Thus, the short chain of three methine protons at  $\delta$  4.38 (H11), 3.98 (H9) and 3.55 (H10) ppm is evidenced in the COSY spectrum by the correlations of H10 with H9 and H11 (blue arrows). On the other hand, the correlations detected in the HMBC spectrum (Fig. 2, red arrows) of H10 with C12, C20 and C21 fixed the position of these carbon atoms. Interestingly, the correlation H10-C21 involved a  $^4J_{\text{CH}}$  probably favoured by the rigidity of the molecule and the zigzag arrangement of H10 and C21. The location of the  $\text{CF}_3$  substituent was established by the cross-peaks of negative slope existing between H11 and the C19 quartet.<sup>15</sup> This assignment was further supported by the doublet observed in the  $^{19}\text{F}$  NMR spectrum measured without  $^1\text{H}$  decoupling at  $\delta$  -76.0 ppm ( $^3J_{\text{FH}}$  7.3 Hz). The same assignment strategy afforded the structure of the azabicyclo[3.2.1]octene system **C**. Thus, the short chain of three methine protons at  $\delta$  4.38 (H11), 3.98 (H9) and 3.55 (H10) ppm is evidenced in the COSY spectrum by the correlations of H10 with H9 and H11 (blue arrows). On the other hand, the correlations detected in the HMBC spectrum (Fig. S1, red arrows) of H10 with C12, C20 and C21 fixed the position of these carbon atoms. Interestingly, the correlation H10-C21 involved a  $^4J_{\text{CH}}$  probably favoured by the rigidity of the molecule and the zigzag arrangement of H10 and C21. The location of the  $\text{CF}_3$  substituent was established by the cross-peaks of negative slope existing between H11 and the C19 quartet.<sup>15</sup> This assignment was further supported by the doublet observed in the  $^{19}\text{F}$  NMR spectrum measured without  $^1\text{H}$  decoupling at  $\delta$  -76.0 ppm ( $^3J_{\text{FH}}$  7.3 Hz).

The assembly of the three substructures was achieved through the correlations shown in the HMBC spectrum between H9-C13, H10-C8 and H7-C9 for fragments **A-C**, and H9-C16 and H10-C15 for the binding of the phenyl ring **B** to carbon C9 of the molecule. Finally, the NOESY spectrum showed correlations of H10 with H9 and H11 (Fig. S1, green arrows) indicating the *syn* arrangement of H9 and H11. Furthermore, the correlations between H4-H6<sup>e</sup> and H9-H7<sup>a</sup> allowed to unravel the assignment of axial and equatorial protons of the methylene groups. The assembly of the three substructures was achieved through the correlations shown in the HMBC spectrum between H9-C13, H10-C8 and H7-C9 for fragments **A-C**, and H9-C16 and H10-C15 for the binding of the phenyl ring **B** to carbon C9 of the molecule. Finally, the NOESY spectrum showed correlations of H10

with H9 and H11 (Fig. S1, green arrows) indicating the *syn* arrangement of H9 and H11. Furthermore, the correlations between H4-H6<sup>e</sup> and H9-H7<sup>a</sup> allowed to unravel the assignment of axial and equatorial protons of the methylene groups.



## X-RAY STRUCTURE OF COMPOUND 3d<sup>6</sup>

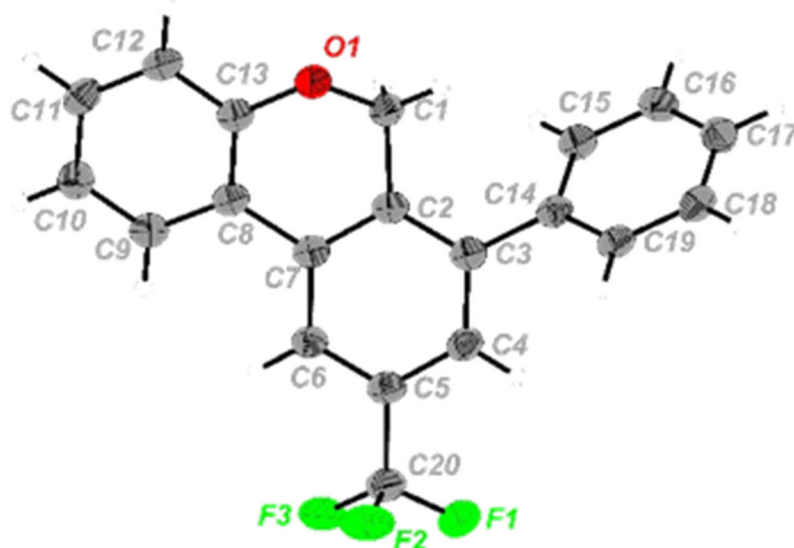

Figure S1. Ortep diagram for compound 3i

<sup>6</sup> CCDC 1989940 contains the supplementary crystallographic data of compound 3d. These data can be obtained free of charge at [www.ccdc.cam.ac.uk/conts/retrieving.html](http://www.ccdc.cam.ac.uk/conts/retrieving.html) [or from the Cambridge Crystallographic Data Centre, 12 Union Road, Cambridge CB2 1EZ, UK; fax: (internat.) +44(1223)336-033, e-mail: [deposit@ccdc.cam.ac.uk](mailto:deposit@ccdc.cam.ac.uk)].

## X-RAY STRUCTURE OF COMPOUND 3i<sup>7</sup>

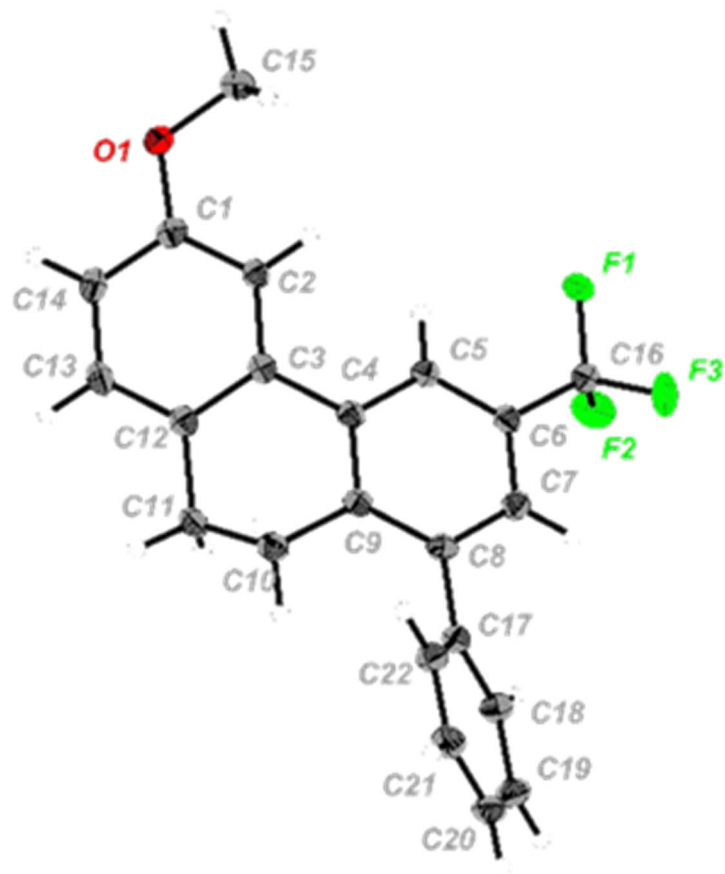

Figure S1. Ortep diagram for compound **3i**

<sup>7</sup> CCDC 1989936 contains the supplementary crystallographic data of compound **3i**. These data can be obtained free of charge at [www.ccdc.cam.ac.uk/conts/retrieving.html](http://www.ccdc.cam.ac.uk/conts/retrieving.html) [or from the Cambridge Crystallographic Data Centre, 12 Union Road, Cambridge CB2 1EZ, UK; fax: (internat.) +44(1223)336-033, e-mail: [deposit@ccdc.cam.ac.uk](mailto:deposit@ccdc.cam.ac.uk)].

## COMPUTATIONAL SUPPORTING INFORMATION

### - Computational details

All structures were optimized using density functional theory (DFT) as implemented in Gaussian<sup>8</sup> with B3LYP<sup>9</sup> as functional and 6-31G\*\* as basis set. Final energies were obtained performing single-point calculations on the previously optimized structures using the M06-2X<sup>10</sup> functional and the basis set Def2TZVPP<sup>11</sup>. Solvation factors were introduced with the IEF-PCM<sup>12</sup> method, using tetrahydrofuran as solvent. The stationary points were characterized by frequency calculations in order to verify that they have the right number of imaginary frequencies. The intrinsic reaction coordinates (IRC)<sup>13</sup> were followed to verify the energy profiles connecting each TS to the correct associated local minima.

Cartesian coordinates of the optimized structures are shown below, as well as their single point energy and correction to Gibbs free energy (in Hartrees). Negative frequencies of transition states are also displayed.

---

<sup>8</sup> Gaussian 16, Revision B.01, M. J. Frisch, G. W. Trucks, H. B. Schlegel, G. E. Scuseria, M. A. Robb, J. R. Cheeseman, G. Scalmani, V. Barone, G. A. Petersson, H. Nakatsuji, X. Li, M. Caricato, A. V. Marenich, J. Bloino, B. G. Janesko, R. Gomperts, B. Mennucci, H. P. Hratchian, J. V. Ortiz, A. F. Izmaylov, J. L. Sonnenberg, D. Williams-Young, F. Ding, F. Lipparini, F. Egidi, J. Goings, B. Peng, A. Petrone, T. Henderson, D. Ranasinghe, V. G. Zakrzewski, J. Gao, N. Rega, G. Zheng, W. Liang, M. Hada, M. Ehara, K. Toyota, R. Fukuda, J. Hasegawa, M. Ishida, T. Nakajima, Y. Honda, O. Kitao, H. Nakai, T. Vreven, K. Throssell, J. A. Montgomery, Jr., J. E. Peralta, F. Ogliaro, M. J. Bearpark, J. J. Heyd, E. N. Brothers, K. N. Kudin, V. N. Staroverov, T. A. Keith, R. Kobayashi, J. Normand, K. Raghavachari, A. P. Rendell, J. C. Burant, S. S. Iyengar, J. Tomasi, M. Cossi, J. M. Millam, M. Klene, C. Adamo, R. Cammi, J. W. Ochterski, R. L. Martin, K. Morokuma, O. Farkas, J. B. Foresman, and D. J. Fox, Gaussian, Inc., Wallingford CT, 2016.

<sup>9</sup> (a) C. Lee, W. Yang, R. G. Parr, *Phys. Rev. B* 1988, **37**, 785-789; (b) A. D. Becke, *J. Chem. Phys.* 1993, **98**, 5648-5652; (c) W. Khon, A. D. Becke, G. R. Parr, *J. Phys. Chem.* 1996, **100**, 12974-12980

<sup>10</sup> Y. Zhao, D. G. Truhlar, *Theor. Chem. Acc.* 2008, **120**, 215-241

<sup>11</sup> (a) F. Furche and R. Ahlrichs, *J. Chem. Phys.* 2003, **119**, 12753; (b) F. Weigend and R. Ahlrichs, *Phys. Chem. Chem. Phys.* 2005, **7**, 3297

<sup>12</sup> (a) E. Cancès, B. Mennucci, J. Tomasi, *J. Chem. Phys.* 1997, **107**, 3032-3047; (b) J. Tomasi, B. Mennucci, E. Cancès, *J. Mol. Struct. (Theochem)* 1999, **464**, 211-226; (c) M. Cossi, V. Barone, B. Mennucci, J. Tomasi, *J. Chem. Phys. Lett.* 1998, **286**, 253-260

<sup>13</sup> C. Gonzalez, H. B. Schlegel, *J. Phys. Chem.* 1990, **94**, 5523.

## Cartesian coordinates and energies

Molecule I:

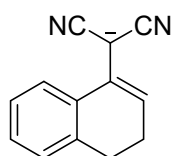

E = -610.381791

G<sub>corr</sub> = 0.143778

|   |           |          |          |
|---|-----------|----------|----------|
| C | -11.49581 | 0.62337  | 0.22458  |
| C | -11.50438 | -0.76237 | 0.08031  |
| C | -10.28904 | 1.30918  | 0.36917  |
| C | -10.29039 | -1.45247 | 0.09404  |
| C | -9.07687  | -0.77878 | 0.23710  |
| C | -9.05739  | 0.63309  | 0.36260  |
| H | -12.42967 | 1.18012  | 0.22768  |
| H | -10.30362 | 2.38512  | 0.48346  |
| H | -12.44116 | -1.30308 | -0.03250 |
| H | -10.28116 | -2.53717 | -0.00031 |
| C | -7.75171  | 1.33348  | 0.55631  |
| C | -7.76537  | -1.52876 | 0.27420  |
| C | -6.82649  | -0.88867 | 1.30192  |
| H | -7.28372  | -1.47043 | -0.71405 |
| H | -7.94217  | -2.59096 | 0.48782  |
| C | -6.71185  | 0.58785  | 1.03067  |
| H | -5.83707  | -1.36106 | 1.24768  |
| H | -7.20650  | -1.10004 | 2.31912  |
| H | -5.76560  | 1.07726  | 1.24139  |
| C | -7.63213  | 2.77403  | 0.31687  |
| C | -8.47627  | 3.51202  | -0.53541 |
| C | -6.50326  | 3.45989  | 0.81385  |
| N | -9.17693  | 4.14794  | -1.23325 |
| N | -5.55977  | 4.00880  | 1.24755  |

---

Molecule 2a:

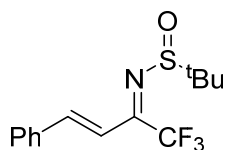

E = -1370.781983

G<sub>corr</sub> = 0.225772

|   |           |         |          |
|---|-----------|---------|----------|
| H | -6.62235  | 2.24702 | -6.34804 |
| H | -4.91901  | 2.20271 | -5.83876 |
| C | -5.69325  | 2.82110 | -6.30195 |
| H | -14.54160 | 2.87412 | -5.31265 |
| C | -13.85803 | 2.12459 | -4.92540 |
| H | -5.38241  | 3.05120 | -7.32734 |
| C | -12.51771 | 2.44560 | -4.72608 |
| H | -12.16062 | 3.44541 | -4.95810 |

|   |           |          |          |
|---|-----------|----------|----------|
| C | -14.31899 | 0.84186  | -4.62731 |
| H | -15.36318 | 0.58707  | -4.78147 |
| C | -11.60831 | 1.49500  | -4.22412 |
| C | -13.42934 | -0.11625 | -4.12950 |
| C | -10.21718 | 1.89471  | -4.03599 |
| F | -6.35235  | 1.33720  | -1.55340 |
| H | -9.97377  | 2.91297  | -4.33325 |
| C | -12.09164 | 0.20357  | -3.93029 |
| O | -4.81854  | 2.91863  | -3.31906 |
| N | -7.50933  | 2.78618  | -3.87492 |
| C | -9.21310  | 1.14649  | -3.52785 |
| H | -13.78322 | -1.11635 | -3.89768 |
| S | -6.06200  | 3.68489  | -3.66935 |
| C | -7.84255  | 1.64440  | -3.38358 |
| C | -5.87683  | 4.12044  | -5.51708 |
| H | -11.41574 | -0.55375 | -3.54646 |
| H | -9.39109  | 0.13399  | -3.18902 |
| C | -6.86435  | 0.71930  | -2.63005 |
| H | -8.00524  | 4.32347  | -5.94619 |
| H | -3.74353  | 4.41158  | -5.17039 |
| F | -7.48703  | -0.39874 | -2.18341 |
| C | -7.09628  | 4.92677  | -5.96501 |
| C | -4.59980  | 4.97134  | -5.55325 |
| H | -6.93480  | 5.27984  | -6.99024 |
| H | -4.39170  | 5.26227  | -6.58841 |
| F | -5.86170  | 0.31829  | -3.42605 |
| H | -7.25151  | 5.80748  | -5.33252 |
| H | -4.70782  | 5.88785  | -4.96286 |

---

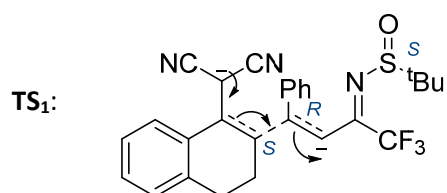

E = -1981.161935

G<sub>corr</sub> = 0.395753

Freq = -315.9738

|   |          |          |          |
|---|----------|----------|----------|
| H | 1.18096  | -1.60163 | -3.03477 |
| H | 2.44064  | -2.84138 | -2.88210 |
| C | 2.25161  | -1.79444 | -3.13798 |
| H | -5.04857 | -0.18535 | -3.85556 |
| C | -4.81562 | -0.31261 | -2.80120 |
| H | 2.54235  | -1.62804 | -4.18334 |
| C | -3.49220 | -0.21312 | -2.36891 |
| H | -2.70307 | -0.01939 | -3.09130 |

|   |          |          |          |
|---|----------|----------|----------|
| C | -5.83346 | -0.57737 | -1.88511 |
| H | -6.86552 | -0.65415 | -2.21692 |
| C | -3.15114 | -0.38094 | -1.01595 |
| C | -5.51153 | -0.73690 | -0.53418 |
| C | -1.72535 | -0.29402 | -0.59591 |
| F | 1.62087  | -2.44447 | 2.03803  |
| H | -1.04613 | -0.03381 | -1.40342 |
| C | -4.19100 | -0.63729 | -0.10184 |
| O | 3.09530  | -2.87238 | -0.40662 |
| N | 1.04365  | -1.09486 | -0.47622 |
| C | -1.21443 | -1.26946 | 0.28984  |
| H | -6.29620 | -0.93473 | 0.19151  |
| S | 2.71809  | -1.40297 | -0.41700 |
| C | 0.15085  | -1.62811 | 0.33846  |
| C | 3.05780  | -0.88347 | -2.21287 |
| H | -3.96236 | -0.74319 | 0.95523  |
| H | -1.88926 | -1.78302 | 0.95924  |
| C | 0.49549  | -2.73073 | 1.35278  |
| H | 1.64051  | 0.75613  | -2.21871 |
| H | 4.81382  | -2.16600 | -2.19249 |
| F | -0.48160 | -2.89859 | 2.27823  |
| C | 2.70618  | 0.59262  | -2.38181 |
| C | 4.56362  | -1.12058 | -2.38917 |
| H | 2.96406  | 0.92424  | -3.39649 |
| H | 4.86217  | -0.87125 | -3.41468 |
| F | 0.66288  | -3.92977 | 0.75541  |
| H | 3.25522  | 1.22244  | -1.67362 |
| H | 5.14910  | -0.49304 | -1.70696 |
| H | -2.23597 | 3.57639  | -0.38127 |
| H | -2.65751 | 1.36861  | 0.82894  |
| C | -1.88786 | 2.61730  | -0.79809 |
| H | 1.59637  | 2.51776  | 2.64015  |
| C | 1.57720  | 2.91644  | 1.63608  |
| H | 3.37451  | 4.03775  | 1.96848  |
| C | 2.59168  | 3.79131  | 1.25648  |
| C | -1.73275 | 1.60175  | 0.31094  |
| H | -2.65943 | 2.29022  | -1.50320 |
| C | 0.54194  | 2.55213  | 0.75146  |
| C | -0.58540 | 1.67410  | 1.15410  |
| C | 2.59621  | 4.35106  | -0.01969 |
| C | -1.82760 | 0.36060  | 2.82641  |
| N | -2.84837 | -0.02192 | 3.25007  |
| C | -0.59633 | 0.88684  | 2.33505  |
| C | 0.54332  | 3.14771  | -0.53842 |
| H | 3.38183  | 5.03817  | -0.32267 |
| C | 1.56426  | 4.02834  | -0.89996 |
| C | -0.55880 | 2.83239  | -1.52116 |
| C | 0.50621  | 0.61171  | 3.19132  |

---

|   |          |         |          |
|---|----------|---------|----------|
| H | -0.63831 | 3.63558 | -2.26320 |
| H | 1.54168  | 4.47121 | -1.89349 |
| N | 1.36905  | 0.36899 | 3.94093  |
| H | -0.29996 | 1.92127 | -2.07693 |

---

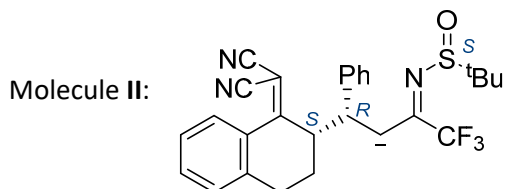

E = -1981.183754

G<sub>corr</sub> = 0.394203

|   |          |          |          |
|---|----------|----------|----------|
| H | -3.27343 | -1.74379 | 0.67475  |
| H | -4.73858 | -1.31107 | -0.22066 |
| C | -4.20768 | -1.17970 | 0.72717  |
| H | -1.13900 | -5.11505 | 2.01719  |
| C | -0.40805 | -4.69461 | 1.33092  |
| H | -4.82745 | -1.58035 | 1.54069  |
| C | -0.24926 | -3.30904 | 1.25183  |
| H | -0.86267 | -2.65967 | 1.87066  |
| C | 0.36388  | -5.53506 | 0.52947  |
| H | 0.24310  | -6.61364 | 0.58821  |
| C | 0.67480  | -2.73347 | 0.36946  |
| C | 1.28917  | -4.97642 | -0.35632 |
| C | 0.83474  | -1.21825 | 0.28310  |
| F | -1.28104 | 1.75812  | -2.77503 |
| H | 0.11362  | -0.77539 | 0.97571  |
| C | 1.43872  | -3.59293 | -0.43645 |
| O | -4.00740 | 0.63765  | -1.71713 |
| N | -1.71587 | -0.04679 | -0.45991 |
| C | 0.51967  | -0.63567 | -1.07246 |
| H | 1.89242  | -5.62063 | -0.99106 |
| S | -3.04275 | 0.98027  | -0.59010 |
| C | -0.71077 | -0.08050 | -1.35715 |
| C | -3.92430 | 0.30503  | 0.95164  |
| H | 2.14969  | -3.17239 | -1.14289 |
| H | 1.24709  | -0.75529 | -1.86482 |
| C | -0.88021 | 0.45886  | -2.77715 |
| H | -2.12106 | -0.00762 | 2.11240  |
| H | -5.80141 | 0.98552  | 0.10072  |
| F | 0.27085  | 0.43109  | -3.50115 |
| C | -3.05220 | 0.55757  | 2.18096  |
| C | -5.23088 | 1.10538  | 1.02526  |
| H | -3.58672 | 0.25735  | 3.09294  |
| H | -5.84150 | 0.75710  | 1.86783  |
| F | -1.78994 | -0.23742 | -3.48689 |

---

|   |          |          |          |
|---|----------|----------|----------|
| H | -2.79485 | 1.61910  | 2.27741  |
| H | -5.03585 | 2.17503  | 1.16990  |
| H | 3.61212  | -0.55731 | 2.35979  |
| H | 2.99243  | -1.37845 | 0.14977  |
| C | 2.56789  | -0.85025 | 2.19450  |
| H | 1.43590  | 3.07281  | -0.60000 |
| C | 1.22114  | 2.87851  | 0.44372  |
| H | 0.15839  | 4.72266  | 0.70795  |
| C | 0.48993  | 3.80187  | 1.17752  |
| C | 2.26485  | -0.76160 | 0.68446  |
| H | 2.47154  | -1.89035 | 2.52517  |
| C | 1.64684  | 1.66572  | 1.01995  |
| C | 2.44714  | 0.68549  | 0.26754  |
| C | 0.16969  | 3.53118  | 2.51084  |
| C | 4.27506  | 0.06912  | -1.25283 |
| N | 4.93666  | -0.71712 | -1.80473 |
| C | 3.48482  | 1.05106  | -0.57488 |
| C | 1.28717  | 1.37306  | 2.35700  |
| H | -0.39785 | 4.25040  | 3.09494  |
| C | 0.56416  | 2.32600  | 3.08396  |
| C | 1.63517  | 0.05045  | 3.01851  |
| C | 3.89520  | 2.39825  | -0.82370 |
| H | 2.07493  | 0.23944  | 4.00604  |
| H | 0.29941  | 2.10728  | 4.11615  |
| N | 4.28490  | 3.47569  | -1.04065 |
| H | 0.69411  | -0.48010 | 3.21327  |

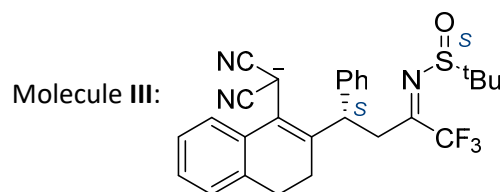

E = -1981.189151

G<sub>corr</sub> = 0.396308

|   |          |          |          |
|---|----------|----------|----------|
| H | 3.77366  | 0.71094  | -3.01279 |
| H | 5.09376  | -0.46749 | -2.94989 |
| C | 4.83995  | 0.58768  | -2.81434 |
| H | -1.28355 | -4.20318 | 2.82599  |
| C | -0.75465 | -3.73664 | 1.99889  |
| H | 5.40667  | 1.18267  | -3.54056 |
| C | -0.99400 | -2.39902 | 1.69344  |
| H | -1.71396 | -1.82937 | 2.27538  |
| C | 0.16542  | -4.47380 | 1.24841  |
| H | 0.35938  | -5.51602 | 1.48814  |
| C | -0.32390 | -1.76320 | 0.63503  |
| C | 0.83626  | -3.85773 | 0.19381  |



|   |          |          |          |
|---|----------|----------|----------|
| C | -0.66966 | -0.30038 | 0.35039  |
| F | 1.06312  | 1.22421  | 2.23068  |
| C | 0.59207  | -2.51565 | -0.11252 |
| O | 4.81581  | -1.56682 | -0.69066 |
| N | 2.77421  | 0.03883  | -0.69958 |
| C | 0.44253  | 0.51476  | -0.38623 |
| H | 1.56069  | -4.41507 | -0.39385 |
| S | 4.45503  | -0.20342 | -0.16589 |
| C | 1.85741  | 0.39498  | 0.12107  |
| C | 5.19447  | 1.03560  | -1.39580 |
| H | 1.13836  | -2.05873 | -0.93063 |
| C | 2.13927  | 0.75551  | 1.59469  |
| H | 3.60452  | 2.52672  | -1.25447 |
| H | 7.05502  | -0.09678 | -1.30871 |
| F | 2.58146  | -0.32902 | 2.26933  |
| C | 4.67734  | 2.43814  | -1.06833 |
| C | 6.70665  | 0.92728  | -1.14799 |
| H | 5.19003  | 3.16944  | -1.70438 |
| H | 7.24022  | 1.58718  | -1.84145 |
| F | 3.10264  | 1.70755  | 1.68141  |
| H | 4.86785  | 2.71017  | -0.02562 |
| H | 6.97082  | 1.22681  | -0.12762 |
| H | -7.69553 | 1.00226  | -0.23998 |
| C | -6.77848 | 0.69012  | -0.73326 |
| H | -5.55365 | 1.26201  | 0.92760  |
| H | -2.49261 | -2.08327 | -1.33546 |
| C | -5.56119 | 0.83906  | -0.06890 |
| C | -6.82151 | 0.14942  | -2.01764 |
| H | -7.76830 | 0.03329  | -2.53930 |
| C | -4.35258 | 0.43435  | -0.66260 |
| C | -2.13725 | -1.08380 | -1.63200 |
| C | -3.03155 | 0.56969  | 0.02912  |
| C | -5.62893 | -0.23930 | -2.62847 |
| C | -2.87094 | 1.56736  | 1.11964  |
| C | -1.98954 | -0.20214 | -0.40690 |
| C | -1.85515 | 2.53079  | 1.00437  |
| C | -4.40547 | -0.10519 | -1.97021 |
| N | -0.99330 | 3.31908  | 0.85549  |
| C | -3.69295 | 1.60804  | 2.25997  |
| N | -4.38113 | 1.62577  | 3.21342  |
| H | -1.16212 | -1.24885 | -2.10704 |
| H | -5.64237 | -0.65156 | -3.63582 |
| C | -3.10680 | -0.47352 | -2.64202 |
| H | -3.28592 | -1.15661 | -3.48104 |
| H | -2.64972 | 0.43589  | -3.06264 |
| H | -0.83584 | 0.18243  | 1.31446  |
| H | 0.48279  | 0.25208  | -1.44643 |
| H | 0.14859  | 1.56952  | -0.30231 |

---

TS<sub>2</sub>:

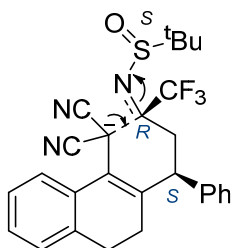

E = -1981.190085

G<sub>corr</sub> = 0.399824

Freq= -141.6457

|   |          |          |          |
|---|----------|----------|----------|
| H | 4.59210  | -1.31277 | 1.30923  |
| H | 5.55410  | 0.14019  | 0.98864  |
| C | 5.30392  | -0.85828 | 0.61698  |
| H | -1.79879 | 6.20718  | 0.78044  |
| C | -1.71677 | 5.31346  | 0.16727  |
| H | 6.21849  | -1.46546 | 0.58207  |
| C | -1.40885 | 4.08918  | 0.76446  |
| H | -1.24897 | 4.03749  | 1.83882  |
| C | -1.91706 | 5.38864  | -1.21082 |
| H | -2.15660 | 6.33966  | -1.67884 |
| C | -1.29302 | 2.92238  | 0.00020  |
| C | -1.80276 | 4.23174  | -1.98564 |
| C | -0.91678 | 1.59132  | 0.65127  |
| F | 1.25160  | 0.68412  | 2.96222  |
| H | -0.98785 | 1.74238  | 1.73810  |
| C | -1.49258 | 3.01246  | -1.38568 |
| O | 3.82201  | 1.72188  | -0.07786 |
| N | 2.38352  | -0.43783 | 0.46989  |
| C | 0.54955  | 1.26744  | 0.30766  |
| H | -1.95187 | 4.27950  | -3.06102 |
| S | 3.22810  | 0.45256  | -0.68802 |
| C | 1.08907  | -0.10784 | 0.73117  |
| C | 4.68839  | -0.75016 | -0.77852 |
| H | -1.39993 | 2.11700  | -1.99487 |
| H | 0.68606  | 1.33706  | -0.77580 |
| C | 0.84424  | -0.39298 | 2.23706  |
| H | 3.47712  | -2.53841 | -0.58804 |
| H | 5.94308  | 0.90109  | -1.42210 |
| F | -0.46407 | -0.58510 | 2.57949  |
| C | 4.18011  | -2.09630 | -1.29688 |
| C | 5.66926  | -0.10132 | -1.76303 |
| H | 5.02372  | -2.78597 | -1.43788 |
| H | 6.58014  | -0.70786 | -1.84450 |
| F | 1.50937  | -1.45805 | 2.69531  |
| H | 3.66911  | -1.98627 | -2.26009 |

|   |          |          |          |
|---|----------|----------|----------|
| H | 5.23020  | -0.01500 | -2.76404 |
| H | -3.79630 | 1.24278  | -0.46338 |
| C | -3.38050 | 0.88946  | 0.49178  |
| H | -1.53990 | -2.99965 | -1.68833 |
| C | -2.51564 | -2.81210 | -1.25714 |
| H | -3.38696 | -4.51514 | -2.23352 |
| C | -3.56746 | -3.67177 | -1.57296 |
| C | -1.92120 | 0.50293  | 0.31341  |
| H | -3.45172 | 1.73693  | 1.18193  |
| C | -2.70878 | -1.70967 | -0.40888 |
| C | -1.61315 | -0.75810 | -0.06386 |
| C | -4.83829 | -3.44998 | -1.04630 |
| C | 0.28869  | -1.17459 | -1.55597 |
| N | 0.60935  | -1.08547 | -2.67229 |
| C | -0.15421 | -1.22961 | -0.17229 |
| C | -4.00470 | -1.48507 | 0.11062  |
| H | -5.66042 | -4.11844 | -1.28785 |
| C | -5.04776 | -2.35323 | -0.20814 |
| C | -4.19990 | -0.29169 | 1.01149  |
| C | 0.05015  | -2.56888 | 0.36037  |
| H | -5.26210 | -0.03202 | 1.08546  |
| H | -6.03669 | -2.16422 | 0.20448  |
| N | 0.21793  | -3.63372 | 0.79883  |
| H | -3.85601 | -0.53976 | 2.02697  |
| H | 1.20293  | 2.02958  | 0.74121  |

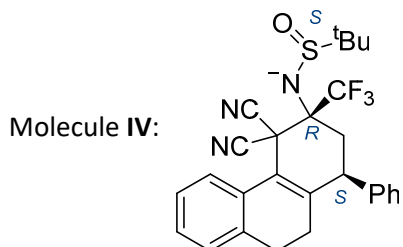

E = -1981.193780

G<sub>corr</sub> = 0.399456

|   |          |          |          |
|---|----------|----------|----------|
| H | 1.46861  | -1.29053 | -2.93165 |
| H | 2.97882  | -2.21508 | -2.94626 |
| C | 2.54264  | -1.22667 | -3.12086 |
| H | -4.41953 | -4.24126 | -2.33146 |
| C | -4.23864 | -3.46736 | -1.58989 |
| H | 2.70705  | -0.94035 | -4.16876 |
| C | -2.99050 | -2.84365 | -1.52976 |
| H | -2.20467 | -3.13716 | -2.22137 |
| C | -5.24972 | -3.09757 | -0.70295 |
| H | -6.22253 | -3.57987 | -0.74845 |
| C | -2.72694 | -1.84487 | -0.58434 |
| C | -5.00064 | -2.10292 | 0.24598  |
| C | -1.34776 | -1.19961 | -0.49659 |

|   |          |          |          |
|---|----------|----------|----------|
| F | 2.55095  | -0.92423 | 2.52259  |
| H | -0.76370 | -1.50288 | -1.37555 |
| C | -3.75189 | -1.48573 | 0.30473  |
| O | 3.74085  | -2.28218 | -0.56294 |
| N | 1.42932  | -1.00785 | -0.33953 |
| C | -0.59077 | -1.72595 | 0.72469  |
| H | -5.78012 | -1.80868 | 0.94395  |
| S | 3.10451  | -0.90313 | -0.41075 |
| C | 0.75924  | -0.99598 | 0.87987  |
| C | 3.19253  | -0.21277 | -2.18000 |
| H | -3.56291 | -0.71600 | 1.04882  |
| H | -1.19902 | -1.61935 | 1.62800  |
| C | 1.47650  | -1.62809 | 2.10620  |
| H | 1.44421  | 1.04480  | -1.98410 |
| H | 5.18238  | -1.05940 | -2.34934 |
| F | 0.66030  | -1.75105 | 3.19137  |
| C | 2.50496  | 1.15017  | -2.22240 |
| C | 4.69329  | -0.08950 | -2.47297 |
| H | 2.60322  | 1.59618  | -3.22216 |
| H | 4.85402  | 0.26189  | -3.50074 |
| F | 1.89189  | -2.87493 | 1.81360  |
| H | 2.94588  | 1.84390  | -1.49821 |
| H | 5.17234  | 0.62436  | -1.79258 |
| H | -3.29439 | 1.08195  | -1.26408 |
| C | -2.28064 | 0.89371  | -1.64781 |
| H | -0.38045 | 3.14238  | 2.17790  |
| C | -0.72176 | 3.51105  | 1.21910  |
| H | -0.77712 | 5.53885  | 1.92194  |
| C | -0.95622 | 4.87861  | 1.07805  |
| C | -1.41097 | 0.31258  | -0.54658 |
| H | -2.39315 | 0.15341  | -2.44691 |
| C | -0.93899 | 2.62050  | 0.15424  |
| C | -0.72403 | 1.14801  | 0.26567  |
| C | -1.41813 | 5.39158  | -0.13173 |
| C | -0.44849 | 0.66503  | 2.64120  |
| N | -1.05855 | 0.71528  | 3.63184  |
| C | 0.24972  | 0.61246  | 1.34939  |
| C | -1.42530 | 3.14935  | -1.06480 |
| H | -1.60085 | 6.45660  | -0.24710 |
| C | -1.65392 | 4.51836  | -1.19468 |
| C | -1.68204 | 2.18776  | -2.19696 |
| C | 1.45012  | 1.45418  | 1.43221  |
| H | -2.34292 | 2.64020  | -2.94499 |
| H | -2.02413 | 4.90219  | -2.14301 |
| N | 2.39039  | 2.13321  | 1.49708  |
| H | -0.73387 | 1.95351  | -2.70261 |
| H | -0.38227 | -2.79076 | 0.58642  |

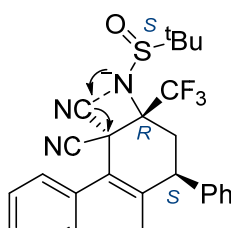

TS<sub>3</sub>:

E = -1981.173520

G<sub>corr</sub> = 0.401924

Freq= -159.7186

|   |          |          |          |
|---|----------|----------|----------|
| H | 3.24837  | 1.46759  | -1.97116 |
| H | 3.02361  | 0.30900  | -3.31157 |
| C | 3.69189  | 0.61802  | -2.50211 |
| H | -3.54354 | -5.14986 | -1.70705 |
| C | -3.52654 | -4.29850 | -1.03136 |
| H | 4.65333  | 0.92099  | -2.93860 |
| C | -2.47962 | -3.37694 | -1.10463 |
| H | -1.68517 | -3.51267 | -1.83435 |
| C | -4.54816 | -4.12613 | -0.09714 |
| H | -5.36548 | -4.84020 | -0.03998 |
| C | -2.43135 | -2.27054 | -0.24746 |
| C | -4.51278 | -3.02623 | 0.76361  |
| C | -1.25546 | -1.29906 | -0.30312 |
| F | 2.47102  | 0.04012  | 2.68207  |
| H | -0.69617 | -1.51491 | -1.22501 |
| C | -3.46398 | -2.11067 | 0.68880  |
| O | 1.46613  | -1.37753 | -2.39040 |
| N | 1.67438  | -0.17087 | 0.00357  |
| C | -0.32538 | -1.58061 | 0.88211  |
| H | -5.30439 | -2.88113 | 1.49434  |
| S | 2.25538  | -1.33438 | -1.08928 |
| C | 0.73693  | -0.50292 | 1.08922  |
| C | 3.92331  | -0.54974 | -1.54195 |
| H | -3.44167 | -1.25483 | 1.35901  |
| H | -0.91373 | -1.63535 | 1.80415  |
| C | 1.56128  | -0.88614 | 2.33938  |
| H | 4.15429  | 0.74556  | 0.18401  |
| H | 4.10324  | -2.05543 | -3.11197 |
| F | 0.78638  | -1.11811 | 3.42956  |
| C | 4.63914  | -0.12685 | -0.25784 |
| C | 4.66758  | -1.69815 | -2.24522 |
| H | 5.67883  | 0.13259  | -0.49772 |
| H | 5.64314  | -1.34001 | -2.59449 |
| F | 2.24316  | -2.04072 | 2.10529  |
| H | 4.65906  | -0.93563 | 0.48181  |
| H | 4.83991  | -2.54468 | -1.57051 |
| H | -3.75929 | 0.48649  | -0.80785 |
| C | -2.81121 | 0.43304  | -1.36567 |

---

|   |          |          |          |
|---|----------|----------|----------|
| H | -0.29085 | 3.56201  | 1.48328  |
| C | -0.97801 | 3.69811  | 0.66266  |
| H | -1.03012 | 5.81904  | 0.97614  |
| C | -1.39199 | 4.99626  | 0.36582  |
| C | -1.66845 | 0.15757  | -0.40475 |
| H | -2.92057 | -0.40702 | -2.05948 |
| C | -1.42088 | 2.59462  | -0.08707 |
| C | -1.02694 | 1.18088  | 0.21345  |
| C | -2.24822 | 5.23653  | -0.70497 |
| C | 0.07052  | 1.53878  | 2.42643  |
| N | -0.01844 | 1.99562  | 3.49433  |
| C | 0.19584  | 0.95472  | 1.10117  |
| C | -2.24580 | 2.85934  | -1.20798 |
| H | -2.57894 | 6.24571  | -0.93736 |
| C | -2.65711 | 4.16118  | -1.49311 |
| C | -2.59249 | 1.72605  | -2.13874 |
| C | 1.51168  | 1.38140  | 0.15268  |
| H | -3.47234 | 1.97633  | -2.74342 |
| H | -3.29539 | 4.33084  | -2.35807 |
| N | 2.07222  | 2.37364  | -0.22742 |
| H | -1.75479 | 1.58101  | -2.83745 |
| H | 0.14848  | -2.55958 | 0.75616  |

---

Molecule V:

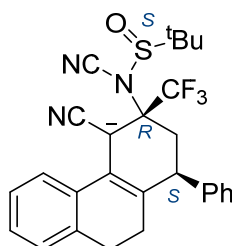

E = -1981.203327

G<sub>corr</sub> = 0.400302

|   |          |          |          |
|---|----------|----------|----------|
| H | -1.93657 | -1.51968 | 2.94779  |
| H | -3.66892 | -1.84349 | 2.76390  |
| C | -2.93148 | -1.07307 | 3.00611  |
| H | 4.38057  | -4.50431 | 1.73718  |
| C | 4.24719  | -3.61332 | 1.12870  |
| H | -3.09756 | -0.74334 | 4.03933  |
| C | 3.02952  | -2.93065 | 1.15877  |
| H | 2.21684  | -3.29763 | 1.78112  |
| C | 5.28833  | -3.15499 | 0.32076  |
| H | 6.23871  | -3.68201 | 0.29835  |
| C | 2.82586  | -1.78085 | 0.38492  |
| C | 5.09784  | -2.01143 | -0.45887 |
| C | 1.47157  | -1.07356 | 0.38733  |
| F | -2.48496 | -0.77323 | -2.61494 |
| H | 0.92174  | -1.47293 | 1.25517  |
| C | 3.87981  | -1.33366 | -0.42618 |

|   |          |          |          |
|---|----------|----------|----------|
| O | -4.23093 | -1.55060 | 0.28540  |
| N | -1.57611 | -1.26041 | 0.08164  |
| C | 0.71764  | -1.48813 | -0.88662 |
| H | 5.90160  | -1.64521 | -1.09289 |
| S | -3.18792 | -0.46780 | 0.26211  |
| C | -0.62076 | -0.74570 | -1.06577 |
| C | -3.07629 | 0.12133  | 2.06434  |
| H | 3.73405  | -0.44143 | -1.02930 |
| H | 1.32664  | -1.23264 | -1.75877 |
| C | -1.24311 | -1.24468 | -2.39009 |
| H | -0.95938 | 0.64842  | 1.98991  |
| H | -5.25915 | 0.10936  | 2.15619  |
| F | -0.48022 | -0.89826 | -3.45089 |
| C | -1.92599 | 1.12049  | 2.17643  |
| C | -4.43330 | 0.81612  | 2.27251  |
| H | -1.91732 | 1.54268  | 3.18940  |
| H | -4.47247 | 1.23508  | 3.28478  |
| F | -1.34092 | -2.60009 | -2.41161 |
| H | -2.03743 | 1.94510  | 1.46598  |
| H | -4.57580 | 1.63918  | 1.56357  |
| H | 3.56637  | 1.18589  | 0.96469  |
| C | 2.57993  | 1.02213  | 1.43299  |
| H | 0.29252  | 3.13591  | -2.22547 |
| C | 0.77565  | 3.54135  | -1.34674 |
| H | 0.90304  | 5.51109  | -2.19448 |
| C | 1.12391  | 4.89245  | -1.32846 |
| C | 1.56546  | 0.43472  | 0.47533  |
| H | 2.76193  | 0.31054  | 2.24947  |
| C | 1.03414  | 2.70542  | -0.24750 |
| C | 0.71974  | 1.23955  | -0.25567 |
| C | 1.74881  | 5.44361  | -0.21178 |
| C | -1.39104 | 1.58643  | -1.54339 |
| N | -2.21311 | 2.31129  | -1.97085 |
| C | -0.40569 | 0.72960  | -1.02530 |
| C | 1.70267  | 3.26616  | 0.86650  |
| H | 2.01833  | 6.49674  | -0.19044 |
| C | 2.04134  | 4.61980  | 0.87642  |
| C | 2.07274  | 2.34855  | 2.00427  |
| C | -1.50011 | -2.52544 | 0.50769  |
| H | 2.82380  | 2.82243  | 2.64856  |
| H | 2.55220  | 5.02778  | 1.74667  |
| N | -1.38558 | -3.61470 | 0.92367  |
| H | 1.18851  | 2.14819  | 2.62769  |
| H | 0.56412  | -2.56873 | -0.90002 |

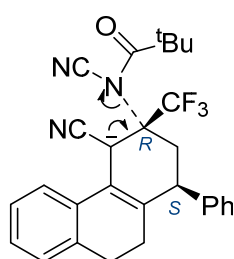

**TS<sub>4</sub>:**

E = -1981.198178

G<sub>corr</sub> = 0.401924

Freq= -234.4029

|   |          |          |          |
|---|----------|----------|----------|
| H | 2.14000  | -1.55017 | -2.94926 |
| H | 3.87902  | -1.78007 | -2.70895 |
| C | 3.11143  | -1.05259 | -2.98854 |
| H | -3.97669 | -4.83226 | -1.64636 |
| C | -3.94566 | -3.90822 | -1.07465 |
| H | 3.29200  | -0.73344 | -4.02299 |
| C | -2.78705 | -3.12942 | -1.08209 |
| H | -1.91502 | -3.45523 | -1.64385 |
| C | -5.05838 | -3.50453 | -0.33545 |
| H | -5.96293 | -4.10721 | -0.33174 |
| C | -2.71639 | -1.93514 | -0.35264 |
| C | -4.99846 | -2.31982 | 0.40190  |
| C | -1.42101 | -1.12739 | -0.32899 |
| F | 2.48658  | -0.47774 | 2.66135  |
| H | -0.81934 | -1.49094 | -1.17544 |
| C | -3.83830 | -1.54575 | 0.39399  |
| O | 4.34338  | -1.43833 | -0.21955 |
| N | 1.68140  | -1.19537 | -0.08177 |
| C | -0.67011 | -1.46367 | 0.96991  |
| H | -5.85790 | -1.99709 | 0.98437  |
| S | 3.24674  | -0.40420 | -0.24563 |
| C | 0.57276  | -0.60145 | 1.18587  |
| C | 3.17033  | 0.15988  | -2.06083 |
| H | -3.79406 | -0.62479 | 0.96929  |
| H | -1.33002 | -1.26820 | 1.82319  |
| C | 1.29052  | -1.05928 | 2.46093  |
| H | 1.03010  | 0.57572  | -2.04886 |
| H | 5.34981  | 0.25573  | -2.08382 |
| F | 0.52533  | -0.78613 | 3.54936  |
| C | 1.97428  | 1.09826  | -2.21558 |
| C | 4.49508  | 0.91868  | -2.24272 |
| H | 1.96774  | 1.51437  | -3.23112 |
| H | 4.54986  | 1.32038  | -3.26163 |
| F | 1.49921  | -2.39777 | 2.47236  |
| H | 2.02444  | 1.93283  | -1.50891 |
| H | 4.57361  | 1.76006  | -1.54530 |
| H | -3.64345 | 0.98723  | -0.99538 |
| C | -2.64548 | 0.86693  | -1.44934 |
| H | -0.53506 | 3.22311  | 2.16699  |



|   |          |          |          |
|---|----------|----------|----------|
| C | -1.02571 | 3.57348  | 1.26866  |
| H | -1.26880 | 5.56093  | 2.04716  |
| C | -1.44483 | 4.90258  | 1.20051  |
| C | -1.61704 | 0.36978  | -0.45513 |
| H | -2.77334 | 0.11767  | -2.24095 |
| C | -1.22595 | 2.69019  | 0.19496  |
| C | -0.83756 | 1.24625  | 0.25433  |
| C | -2.08310 | 5.38156  | 0.05835  |
| C | 1.26284  | 1.75036  | 1.51252  |
| N | 2.04256  | 2.54825  | 1.87557  |
| C | 0.30667  | 0.81121  | 1.06650  |
| C | -1.90682 | 3.17637  | -0.94592 |
| H | -2.40750 | 6.41744  | -0.00160 |
| C | -2.31672 | 4.50840  | -1.00560 |
| C | -2.20330 | 2.20065  | -2.05663 |
| C | 1.56877  | -2.44362 | -0.52329 |
| H | -2.96744 | 2.60682  | -2.73043 |
| H | -2.83529 | 4.86044  | -1.89533 |
| N | 1.36664  | -3.53192 | -0.91842 |
| H | -1.29687 | 2.03057  | -2.65674 |
| H | -0.41671 | -2.52425 | 0.99272  |

---

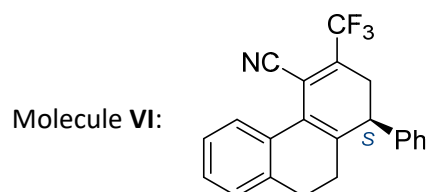

E = -1202.252502

G<sub>corr</sub> = 0.272913

|   |          |          |          |
|---|----------|----------|----------|
| H | 4.18422  | -4.35037 | 2.18423  |
| C | 4.12104  | -3.57210 | 1.42935  |
| C | 2.94188  | -2.83748 | 1.28929  |
| H | 2.09483  | -3.05119 | 1.93649  |
| C | 5.21242  | -3.30693 | 0.60292  |
| H | 6.13091  | -3.87609 | 0.71020  |
| C | 2.83241  | -1.82988 | 0.32393  |
| C | 5.11655  | -2.30378 | -0.36398 |
| C | 1.52597  | -1.06490 | 0.15179  |
| F | -2.53361 | -0.56677 | -2.45635 |
| H | 0.84088  | -1.40837 | 0.94496  |
| C | 3.93706  | -1.57361 | -0.50224 |
| C | 0.88313  | -1.40506 | -1.20559 |
| H | 5.96173  | -2.08905 | -1.01146 |
| C | -0.36540 | -0.59344 | -1.43303 |
| H | 3.87606  | -0.79423 | -1.25754 |
| H | 1.59921  | -1.19708 | -2.01387 |
| C | -1.47728 | -1.32367 | -2.13215 |

---

|   |          |          |          |
|---|----------|----------|----------|
| F | -1.00389 | -1.87576 | -3.27764 |
| F | -1.92645 | -2.34790 | -1.36497 |
| H | 3.64710  | 1.19494  | 0.62012  |
| C | 2.72990  | 1.01393  | 1.20082  |
| H | -0.01278 | 3.23749  | -2.10490 |
| C | 0.53664  | 3.62309  | -1.25375 |
| H | 0.42979  | 5.64807  | -1.96463 |
| C | 0.79320  | 4.99164  | -1.17999 |
| C | 1.65822  | 0.44519  | 0.29982  |
| H | 3.00161  | 0.27236  | 1.95883  |
| C | 0.98986  | 2.75136  | -0.25225 |
| C | 0.78021  | 1.28222  | -0.31447 |
| C | 1.51630  | 5.50966  | -0.10727 |
| C | -1.58545 | 1.50158  | -1.10750 |
| N | -2.52639 | 2.18437  | -1.12533 |
| C | -0.39820 | 0.69438  | -1.01488 |
| C | 1.74610  | 3.27791  | 0.81855  |
| H | 1.71742  | 6.57493  | -0.04429 |
| C | 1.99456  | 4.64804  | 0.88181  |
| C | 2.26113  | 2.31503  | 1.86099  |
| H | 3.07422  | 2.76838  | 2.43659  |
| H | 2.57347  | 5.04352  | 1.71268  |
| H | 1.45778  | 2.08042  | 2.57499  |
| H | 0.65933  | -2.47322 | -1.25414 |

---

Molecule VII:

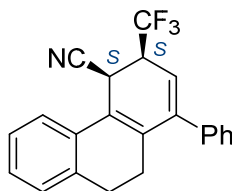

E = -1202.261483

G<sub>corr</sub> = 0.273704

|   |          |          |          |
|---|----------|----------|----------|
| H | 1.56317  | -4.28861 | 4.07137  |
| C | 2.08214  | -3.55912 | 3.45645  |
| C | 1.35607  | -2.75183 | 2.58072  |
| H | 0.27585  | -2.84631 | 2.52194  |
| C | 3.46803  | -3.42585 | 3.54689  |
| H | 4.03377  | -4.05350 | 4.22898  |
| C | 2.00363  | -1.79755 | 1.78095  |
| C | 4.12385  | -2.47965 | 2.75659  |
| C | 1.22955  | -0.96952 | 0.81266  |
| F | -2.46151 | -1.66039 | -0.34721 |
| C | 3.39858  | -1.67024 | 1.88413  |
| C | 0.39472  | -1.56945 | -0.06039 |
| H | 5.20331  | -2.37520 | 2.81497  |
| C | -0.39117 | -0.77415 | -1.07046 |

|   |          |          |          |
|---|----------|----------|----------|
| H | 3.91822  | -0.95004 | 1.25906  |
| H | 0.27425  | -2.64709 | -0.05717 |
| C | -1.81687 | -0.49855 | -0.58527 |
| F | -1.86091 | 0.23044  | 0.54649  |
| F | -2.52600 | 0.17388  | -1.52351 |
| H | 3.03694  | 1.34204  | 1.88351  |
| C | 1.95310  | 1.21496  | 2.02259  |
| H | 0.94887  | 2.94437  | -2.42193 |
| C | 1.07587  | 3.44755  | -1.46880 |
| H | 1.22043  | 5.38316  | -2.39225 |
| C | 1.24035  | 4.83169  | -1.45722 |
| C | 1.36442  | 0.50521  | 0.81774  |
| H | 1.83019  | 0.60242  | 2.91935  |
| C | 1.10974  | 2.70762  | -0.27468 |
| C | 0.95092  | 1.24441  | -0.24324 |
| C | 1.43533  | 5.50066  | -0.24976 |
| C | 1.38506  | 0.24809  | -2.46011 |
| N | 2.20206  | 0.02793  | -3.25524 |
| C | 0.34443  | 0.53609  | -1.45526 |
| C | 1.31157  | 3.39176  | 0.94721  |
| H | 1.56342  | 6.57885  | -0.23496 |
| C | 1.46898  | 4.77602  | 0.94406  |
| C | 1.29569  | 2.58365  | 2.22303  |
| H | 1.79072  | 3.13117  | 3.03138  |
| H | 1.61878  | 5.29404  | 1.88807  |
| H | 0.25166  | 2.43098  | 2.53551  |
| H | -0.38187 | 1.19967  | -1.93660 |
| H | -0.52706 | -1.36805 | -1.97990 |

---

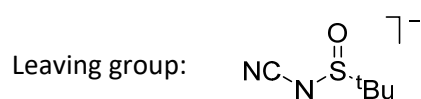

E = -778.957079

G<sub>corr</sub> = 0.103223

|   |          |          |         |
|---|----------|----------|---------|
| N | 0.33097  | -0.98217 | 3.73946 |
| C | -0.68918 | -0.47350 | 3.42808 |
| H | -1.87375 | 2.69843  | 3.33914 |
| N | -1.84824 | 0.11857  | 3.20713 |
| C | -2.27877 | 3.00500  | 2.37214 |
| H | -1.43734 | 3.17369  | 1.68848 |
| H | -3.97652 | 1.36745  | 3.78066 |
| H | -2.80976 | 3.96009  | 2.49047 |
| S | -2.23092 | 0.33002  | 1.58500 |
| C | -4.37028 | 1.63065  | 2.79617 |
| C | -3.22309 | 1.93184  | 1.83153 |
| H | -5.03513 | 2.50085  | 2.89013 |
| O | -3.29079 | -0.64985 | 1.09379 |

|   |          |         |          |
|---|----------|---------|----------|
| H | -4.94748 | 0.77969 | 2.42142  |
| C | -3.75882 | 2.29909 | 0.44325  |
| H | -2.94040 | 2.50499 | -0.25782 |
| H | -4.38904 | 3.19695 | 0.49849  |
| H | -4.35218 | 1.47433 | 0.03937  |

---

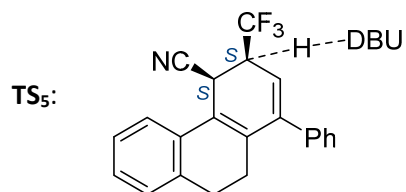

E = -1664.315305

G<sub>corr</sub> = 0.50129

Freq= -834.3117

|   |          |          |          |
|---|----------|----------|----------|
| H | -1.92333 | 5.44272  | -1.22677 |
| C | -0.92102 | 5.02469  | -1.18187 |
| C | -0.72874 | 3.74771  | -0.65697 |
| H | -1.58420 | 3.17745  | -0.30630 |
| C | 0.16456  | 5.75984  | -1.66081 |
| H | 0.01616  | 6.75278  | -2.07506 |
| C | 0.55275  | 3.17128  | -0.58068 |
| C | 1.44374  | 5.20430  | -1.59833 |
| C | 0.76305  | 1.83174  | 0.02493  |
| F | -0.24964 | -1.24404 | 3.59375  |
| C | 1.63492  | 3.93187  | -1.06236 |
| C | 0.13106  | 1.49165  | 1.19577  |
| H | 2.30032  | 5.76962  | -1.95520 |
| C | 0.30633  | 0.20355  | 1.81875  |
| H | 2.64002  | 3.52845  | -0.98694 |
| H | -0.56222 | 2.19867  | 1.64495  |
| C | -0.17976 | 0.06681  | 3.21492  |
| F | 0.56423  | 0.68155  | 4.17351  |
| F | -1.44544 | 0.57909  | 3.35877  |
| H | 2.99312  | 1.38543  | -2.14471 |
| C | 1.99074  | 0.93785  | -2.07522 |
| H | 3.59921  | -2.22358 | 1.24280  |
| C | 3.57379  | -2.27657 | 0.15947  |
| H | 4.92409  | -3.94747 | 0.10621  |
| C | 4.33809  | -3.24929 | -0.48470 |
| C | 1.59193  | 0.81177  | -0.61390 |
| H | 1.31450  | 1.61705  | -2.60014 |
| C | 2.81343  | -1.34529 | -0.57375 |
| C | 1.99192  | -0.30845 | 0.06852  |
| C | 4.36123  | -3.31642 | -1.87689 |
| C | 2.79558  | 0.22254  | 2.34378  |

|   |          |          |          |
|---|----------|----------|----------|
| N | 3.68758  | 0.69578  | 2.91877  |
| C | 1.68764  | -0.40777 | 1.56545  |
| C | 2.84900  | -1.41773 | -1.98951 |
| H | 4.95844  | -4.06943 | -2.38261 |
| C | 3.61568  | -2.39530 | -2.61867 |
| C | 2.00813  | -0.43012 | -2.76276 |
| H | 2.37105  | -0.33980 | -3.79229 |
| H | 3.63250  | -2.43523 | -3.70570 |
| H | 0.97273  | -0.80378 | -2.82674 |
| H | 1.67479  | -1.45819 | 1.87723  |
| H | -0.70619 | -0.76567 | 1.05405  |
| H | -0.98149 | -2.42386 | -2.10754 |
| H | -2.96778 | 0.97150  | -1.11133 |
| H | -4.47061 | -0.84244 | -2.58968 |
| H | -5.35850 | 1.31079  | -1.72929 |
| C | -1.21374 | -3.18663 | -1.35648 |
| C | -3.75521 | 0.87181  | -0.35442 |
| H | -0.75379 | -4.12318 | -1.68357 |
| H | -3.16969 | -3.46276 | -2.24389 |
| C | -5.14487 | -0.83483 | -1.72369 |
| C | -5.09685 | 0.52377  | -1.01285 |
| H | -3.84879 | 1.85567  | 0.11764  |
| H | 0.40181  | -2.48689 | -0.08754 |
| C | -2.72402 | -3.36483 | -1.24870 |
| C | -0.65486 | -2.74984 | -0.00620 |
| H | -6.15730 | -0.99391 | -2.11424 |
| N | -1.36948 | -1.57228 | 0.48076  |
| C | -2.62929 | -1.36588 | 0.19027  |
| N | -3.35099 | -2.20624 | -0.58743 |
| C | -3.29176 | -0.12203 | 0.73405  |
| H | -2.58215 | 0.35607  | 1.40653  |
| C | -4.79460 | -2.02338 | -0.81632 |
| H | -5.87985 | 0.54107  | -0.24155 |
| H | -5.14692 | -2.95370 | -1.26806 |
| H | -2.96984 | -4.27695 | -0.68807 |
| H | -0.74236 | -3.55837 | 0.73160  |
| H | -4.14605 | -0.41828 | 1.35655  |
| H | -5.31286 | -1.93491 | 0.14560  |

---

Molecule VIII:

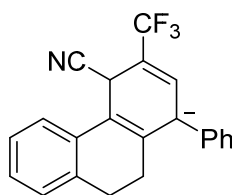

E = -1664.322412

G<sub>corr</sub> = 0.504175

|   |          |          |          |
|---|----------|----------|----------|
| H | -2.38154 | 5.21263  | -1.17363 |
| C | -1.34522 | 4.88416  | -1.18608 |
| C | -1.00641 | 3.65208  | -0.63043 |
| H | -1.78612 | 3.03002  | -0.19960 |
| C | -0.36496 | 5.68871  | -1.77024 |
| H | -0.62780 | 6.64675  | -2.20913 |
| C | 0.32347  | 3.18492  | -0.62201 |
| C | 0.95865  | 5.24534  | -1.77697 |
| C | 0.68841  | 1.89573  | 0.01018  |
| F | -0.18768 | -1.26073 | 3.51756  |
| C | 1.29731  | 4.01946  | -1.20650 |
| C | 0.10419  | 1.52454  | 1.21598  |
| H | 1.73735  | 5.86515  | -2.21353 |
| C | 0.43135  | 0.32862  | 1.88789  |
| H | 2.33785  | 3.71132  | -1.18333 |
| H | -0.66775 | 2.16160  | 1.64071  |
| C | -0.09802 | 0.08164  | 3.24220  |
| F | 0.62770  | 0.59944  | 4.27128  |
| F | -1.36552 | 0.58687  | 3.40027  |
| H | 2.95679  | 1.53058  | -2.15220 |
| C | 1.96521  | 1.06064  | -2.07536 |
| H | 3.75038  | -2.00881 | 1.23634  |
| C | 3.69937  | -2.07530 | 0.15474  |
| H | 5.09712  | -3.70536 | 0.09055  |
| C | 4.47748  | -3.03256 | -0.49593 |
| C | 1.57653  | 0.93577  | -0.60993 |
| H | 1.27046  | 1.71645  | -2.60494 |
| C | 2.89230  | -1.17330 | -0.56934 |
| C | 2.04514  | -0.16585 | 0.07923  |
| C | 4.47513  | -3.11613 | -1.88754 |
| C | 2.91478  | 0.42179  | 2.33405  |
| N | 3.79445  | 0.94058  | 2.88890  |
| C | 1.80582  | -0.25265 | 1.58655  |
| C | 2.90361  | -1.26401 | -1.98664 |
| H | 5.08497  | -3.85580 | -2.39787 |
| C | 3.68688  | -2.22397 | -2.62154 |
| C | 2.01794  | -0.31138 | -2.75296 |
| H | 2.36097  | -0.21726 | -3.78921 |

|   |          |          |          |
|---|----------|----------|----------|
| H | 3.68290  | -2.27318 | -3.70860 |
| H | 0.99308  | -0.71775 | -2.79906 |
| H | 1.83791  | -1.29962 | 1.91228  |
| H | -0.70921 | -0.90323 | 0.93508  |
| H | -0.92097 | -2.35097 | -2.24579 |
| H | -3.10879 | 0.84544  | -0.95198 |
| H | -4.53024 | -1.01531 | -2.45558 |
| H | -5.54736 | 1.00782  | -1.43423 |
| C | -1.04303 | -3.15819 | -1.51595 |
| C | -3.84416 | 0.63601  | -0.16606 |
| H | -0.53010 | -4.03961 | -1.90913 |
| H | -3.02062 | -3.56866 | -2.29790 |
| C | -5.15964 | -1.10866 | -1.56142 |
| C | -5.18555 | 0.20955  | -0.77669 |
| H | -3.99154 | 1.57935  | 0.36967  |
| H | 0.58229  | -2.35147 | -0.31327 |
| C | -2.52443 | -3.46866 | -1.32791 |
| C | -0.43229 | -2.73302 | -0.18592 |
| H | -6.17369 | -1.32959 | -1.91515 |
| N | -1.23555 | -1.65605 | 0.39254  |
| C | -2.52923 | -1.53063 | 0.18881  |
| N | -3.21060 | -2.39061 | -0.58688 |
| C | -3.24318 | -0.37261 | 0.83918  |
| H | -2.53237 | 0.12573  | 1.49755  |
| C | -4.67642 | -2.31291 | -0.74062 |
| H | -5.92603 | 0.12020  | 0.03058  |
| H | -4.97433 | -3.24368 | -1.22807 |
| H | -2.66194 | -4.41417 | -0.78733 |
| H | -0.39502 | -3.57330 | 0.51852  |
| H | -4.03335 | -0.76958 | 1.48938  |
| H | -5.14802 | -2.31813 | 0.24860  |

---

DBU:

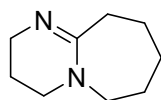

E = -462.061789

G<sub>corr</sub> = 0.210705

|   |          |          |          |
|---|----------|----------|----------|
| C | -7.33977 | 1.85620  | 0.21819  |
| C | -6.67965 | 0.49208  | 0.46100  |
| C | -6.38391 | 3.05572  | 0.22130  |
| H | -8.12026 | 2.01894  | 0.97189  |
| H | -7.85647 | 1.82509  | -0.75230 |
| C | -5.23345 | 2.94182  | -0.79325 |
| H | -5.95185 | 3.19849  | 1.22030  |
| H | -6.95786 | 3.96350  | -0.00682 |
| C | -5.62067 | 0.08941  | -0.58763 |
| H | -7.46635 | -0.27191 | 0.46201  |

|   |          |          |          |
|---|----------|----------|----------|
| H | -6.22392 | 0.46280  | 1.45919  |
| C | -4.24152 | 0.68280  | -0.36717 |
| H | -5.98920 | 0.33868  | -1.59307 |
| H | -5.46444 | -0.99014 | -0.56515 |
| N | -4.13884 | 2.06581  | -0.37816 |
| H | -4.79517 | 3.93186  | -0.95112 |
| H | -5.62964 | 2.63012  | -1.76968 |
| C | -2.85550 | 2.70552  | -0.08247 |
| C | -1.96676 | 1.77227  | 0.73445  |
| H | -3.04759 | 3.63202  | 0.47301  |
| H | -2.34565 | 2.99237  | -1.01637 |
| C | -1.94500 | 0.39201  | 0.07219  |
| H | -2.37277 | 1.67864  | 1.74870  |
| H | -0.96044 | 2.19675  | 0.81987  |
| N | -3.27956 | -0.14906 | -0.15475 |
| H | -1.38652 | -0.31870 | 0.69293  |
| H | -1.40447 | 0.44860  | -0.88606 |

---

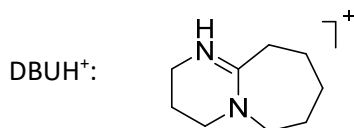

E = -462.530203

G<sub>corr</sub> = 0.226186

|   |          |          |          |
|---|----------|----------|----------|
| C | -7.34171 | 1.84941  | 0.23221  |
| C | -6.69663 | 0.47384  | 0.44282  |
| C | -6.37259 | 3.03828  | 0.25988  |
| H | -8.10797 | 1.99771  | 0.99976  |
| H | -7.87132 | 1.84716  | -0.72993 |
| C | -5.25891 | 2.96308  | -0.79192 |
| H | -5.92030 | 3.15177  | 1.25304  |
| H | -6.93760 | 3.95749  | 0.07104  |
| C | -5.63545 | 0.09496  | -0.61963 |
| H | -7.47778 | -0.29133 | 0.40221  |
| H | -6.24962 | 0.40422  | 1.44203  |
| C | -4.28935 | 0.73615  | -0.39681 |
| H | -5.99296 | 0.36415  | -1.62115 |
| H | -5.49197 | -0.98907 | -0.62937 |
| N | -4.14098 | 2.05392  | -0.42711 |
| H | -4.80262 | 3.94379  | -0.93473 |
| H | -5.65798 | 2.65973  | -1.76573 |
| C | -2.83516 | 2.69101  | -0.13070 |
| C | -1.95100 | 1.78683  | 0.72277  |
| H | -3.04301 | 3.62506  | 0.39631  |
| H | -2.35007 | 2.94477  | -1.08064 |
| C | -1.88464 | 0.39115  | 0.11177  |
| H | -2.35147 | 1.72556  | 1.73971  |
| H | -0.94879 | 2.21681  | 0.78781  |



|   |          |          |          |
|---|----------|----------|----------|
| N | -3.25602 | -0.06803 | -0.14591 |
| H | -1.41225 | -0.32130 | 0.79124  |
| H | -1.31862 | 0.39065  | -0.82674 |
| H | -3.44197 | -1.06072 | -0.12887 |

---

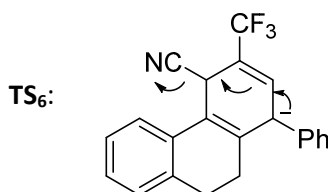

E = -1201.754664

G<sub>corr</sub> = 0.255612

Freq= -241.7360

|   |          |          |          |
|---|----------|----------|----------|
| H | -4.41666 | -2.38895 | -0.61713 |
| C | -3.74849 | -2.00169 | 0.14854  |
| C | -2.43524 | -1.67775 | -0.18624 |
| H | -2.09360 | -1.80073 | -1.20972 |
| C | -4.21269 | -1.81595 | 1.45266  |
| H | -5.23870 | -2.06128 | 1.71410  |
| C | -1.53183 | -1.16582 | 0.76906  |
| C | -3.33669 | -1.31177 | 2.41594  |
| C | -0.12744 | -0.88777 | 0.38445  |
| F | 3.87812  | -2.96433 | -1.01939 |
| C | -2.01945 | -0.99945 | 2.08185  |
| C | 0.55772  | -1.87871 | -0.34438 |
| H | -3.67541 | -1.17489 | 3.44044  |
| C | 1.87744  | -1.73125 | -0.72566 |
| H | -1.34505 | -0.64877 | 2.85611  |
| H | 0.05527  | -2.81950 | -0.54606 |
| C | 2.58352  | -2.82988 | -1.43592 |
| F | 1.99244  | -4.04372 | -1.24075 |
| F | 2.65175  | -2.66345 | -2.78126 |
| H | 0.17558  | 1.20837  | 2.65749  |
| C | -0.04239 | 1.37705  | 1.59075  |
| H | 4.66047  | 0.84187  | 0.44434  |
| C | 4.09170  | 1.69772  | 0.79038  |
| H | 5.86849  | 2.83087  | 1.20785  |
| C | 4.78138  | 2.82679  | 1.22823  |
| C | 0.59371  | 0.28216  | 0.74963  |
| H | -1.13007 | 1.34964  | 1.48951  |
| C | 2.68525  | 1.64240  | 0.80263  |
| C | 1.92961  | 0.45547  | 0.35743  |
| C | 4.08436  | 3.94351  | 1.68848  |
| C | 2.63349  | 0.51575  | -2.43185 |
| N | 2.47480  | 1.09855  | -3.43864 |

|   |         |          |          |
|---|---------|----------|----------|
| C | 2.55223 | -0.48315 | -0.54427 |
| C | 1.98921 | 2.79032  | 1.25435  |
| H | 4.61665 | 4.82658  | 2.03249  |
| C | 2.68793 | 3.91349  | 1.69344  |
| C | 0.48398 | 2.75822  | 1.19461  |
| H | 0.05326 | 3.53633  | 1.83646  |
| H | 2.12700 | 4.78182  | 2.03485  |
| H | 0.16079 | 2.97412  | 0.16535  |
| H | 3.63006 | -0.52267 | -0.57576 |

---

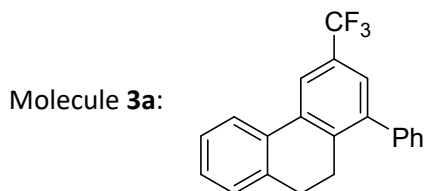

E = -1108.841160

G<sub>corr</sub> = 0.254685

|   |          |          |          |
|---|----------|----------|----------|
| H | 5.31723  | -2.64614 | 2.71826  |
| C | 4.23258  | -2.66080 | 2.66260  |
| C | 3.57464  | -1.79846 | 1.78628  |
| H | 4.15132  | -1.12796 | 1.15629  |
| C | 3.50261  | -3.54559 | 3.45797  |
| H | 4.01531  | -4.21647 | 4.14088  |
| C | 2.17401  | -1.80398 | 1.68773  |
| C | 2.11015  | -3.56434 | 3.36791  |
| C | 1.45700  | -0.91974 | 0.72220  |
| F | -1.23549 | -0.72560 | -3.21335 |
| C | 1.45289  | -2.70348 | 2.48932  |
| C | 0.58636  | -1.52253 | -0.19626 |
| H | 1.53313  | -4.24794 | 3.98392  |
| C | -0.10305 | -0.75526 | -1.13192 |
| H | 0.36841  | -2.71539 | 2.42938  |
| H | 0.46511  | -2.59997 | -0.18771 |
| C | -1.08933 | -1.41256 | -2.05740 |
| F | -0.71795 | -2.67242 | -2.37915 |
| F | -2.32044 | -1.50073 | -1.49808 |
| H | 3.48081  | 1.39812  | 1.28575  |
| C | 2.48314  | 1.21578  | 1.71141  |
| H | 0.63145  | 2.97645  | -2.39480 |
| C | 0.92723  | 3.47631  | -1.47793 |
| H | 0.93193  | 5.41899  | -2.39845 |
| C | 1.10724  | 4.85754  | -1.48563 |
| C | 1.62134  | 0.48167  | 0.70262  |
| H | 2.63151  | 0.60265  | 2.60276  |
| C | 1.15207  | 2.72465  | -0.31373 |
| C | 0.94326  | 1.25501  | -0.27037 |

|   |          |         |          |
|---|----------|---------|----------|
| C | 1.52377  | 5.51217 | -0.32594 |
| C | 0.07611  | 0.62429 | -1.17113 |
| C | 1.59238  | 3.38890 | 0.85076  |
| H | 1.66973  | 6.58831 | -0.32610 |
| C | 1.76882  | 4.77361 | 0.83169  |
| C | 1.85409  | 2.56346 | 2.08745  |
| H | 2.50575  | 3.10740 | 2.77885  |
| H | 2.10638  | 5.27658 | 1.73454  |
| H | 0.90940  | 2.38120 | 2.62059  |
| H | -0.47597 | 1.20877 | -1.89719 |

---

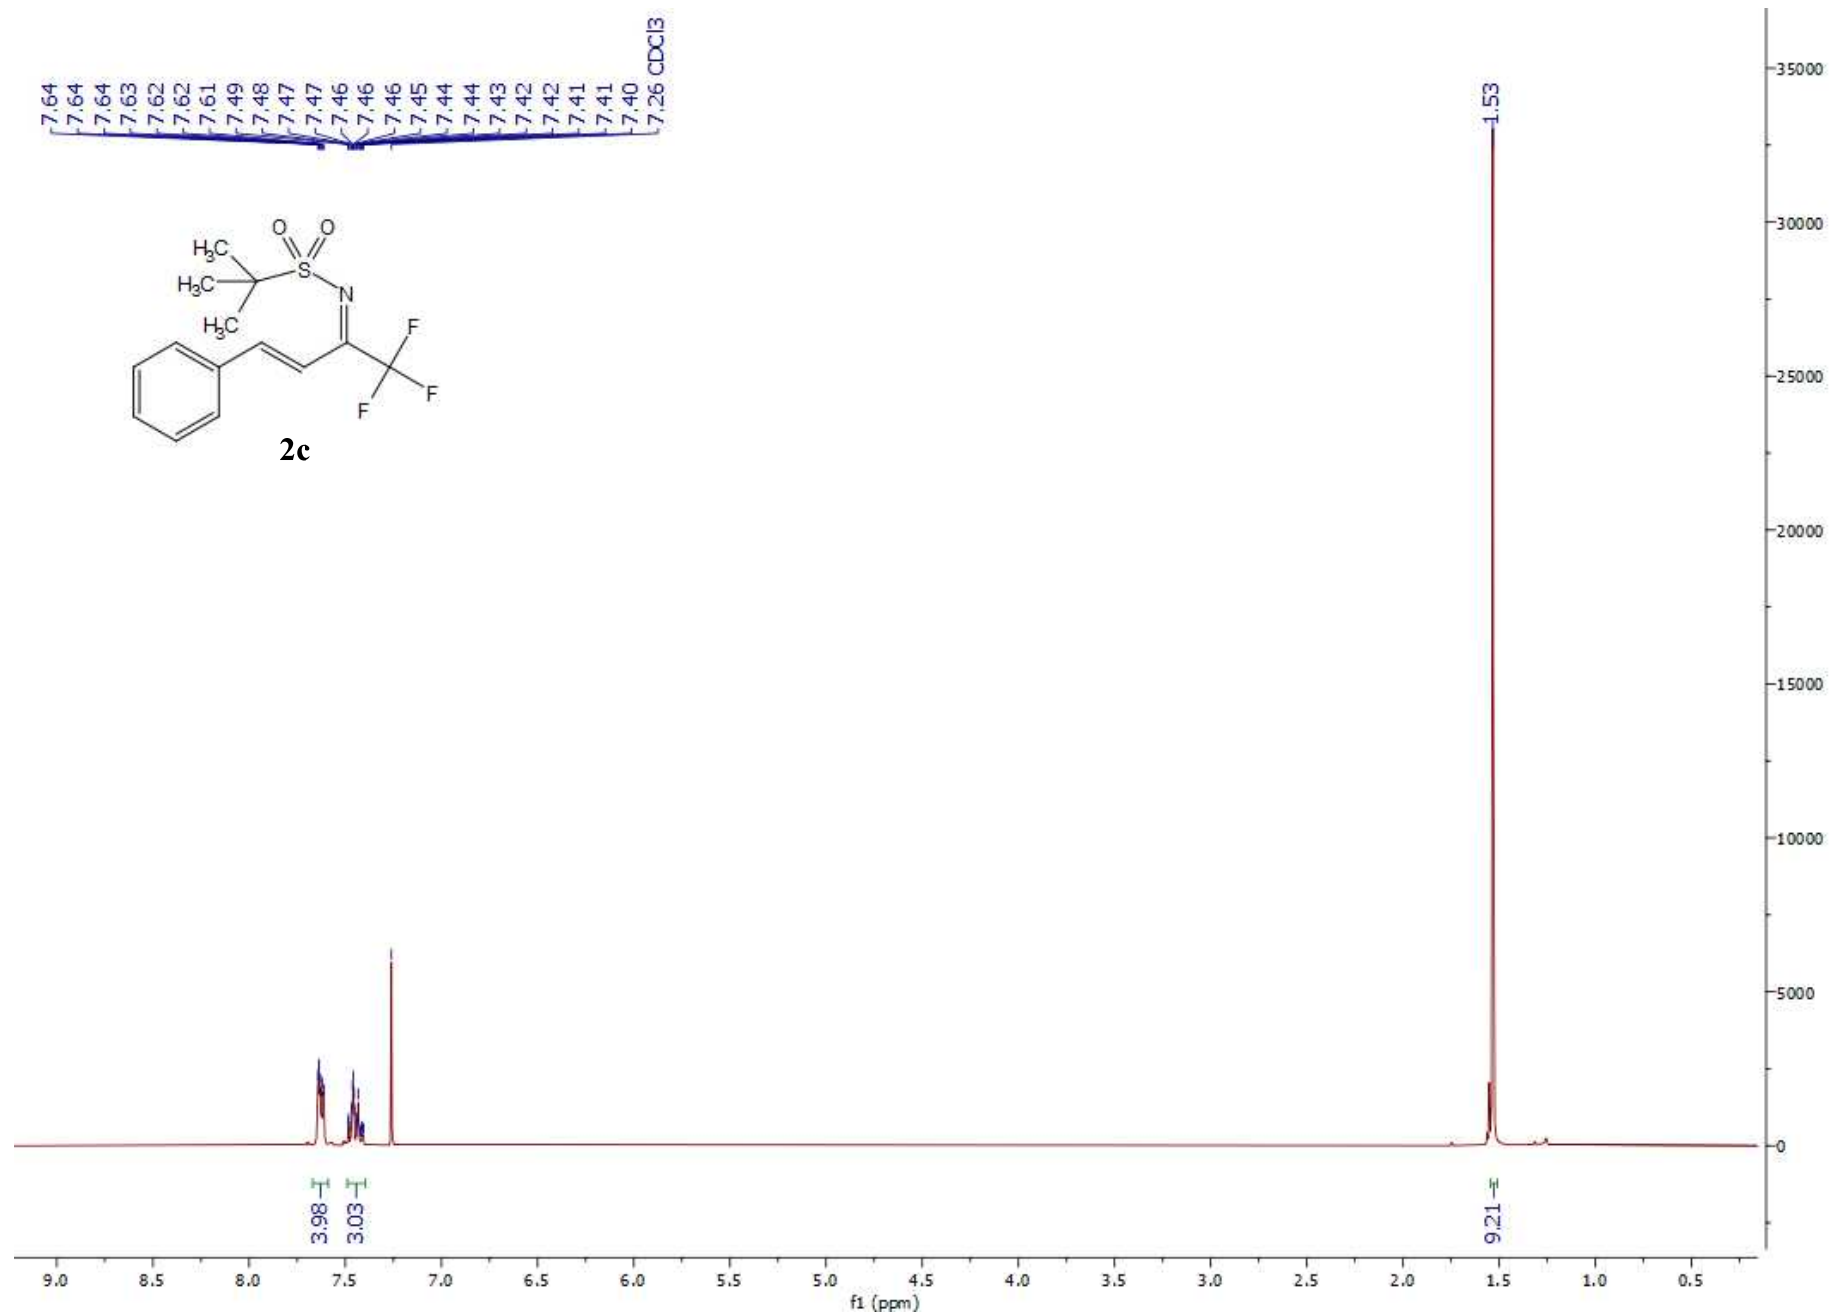

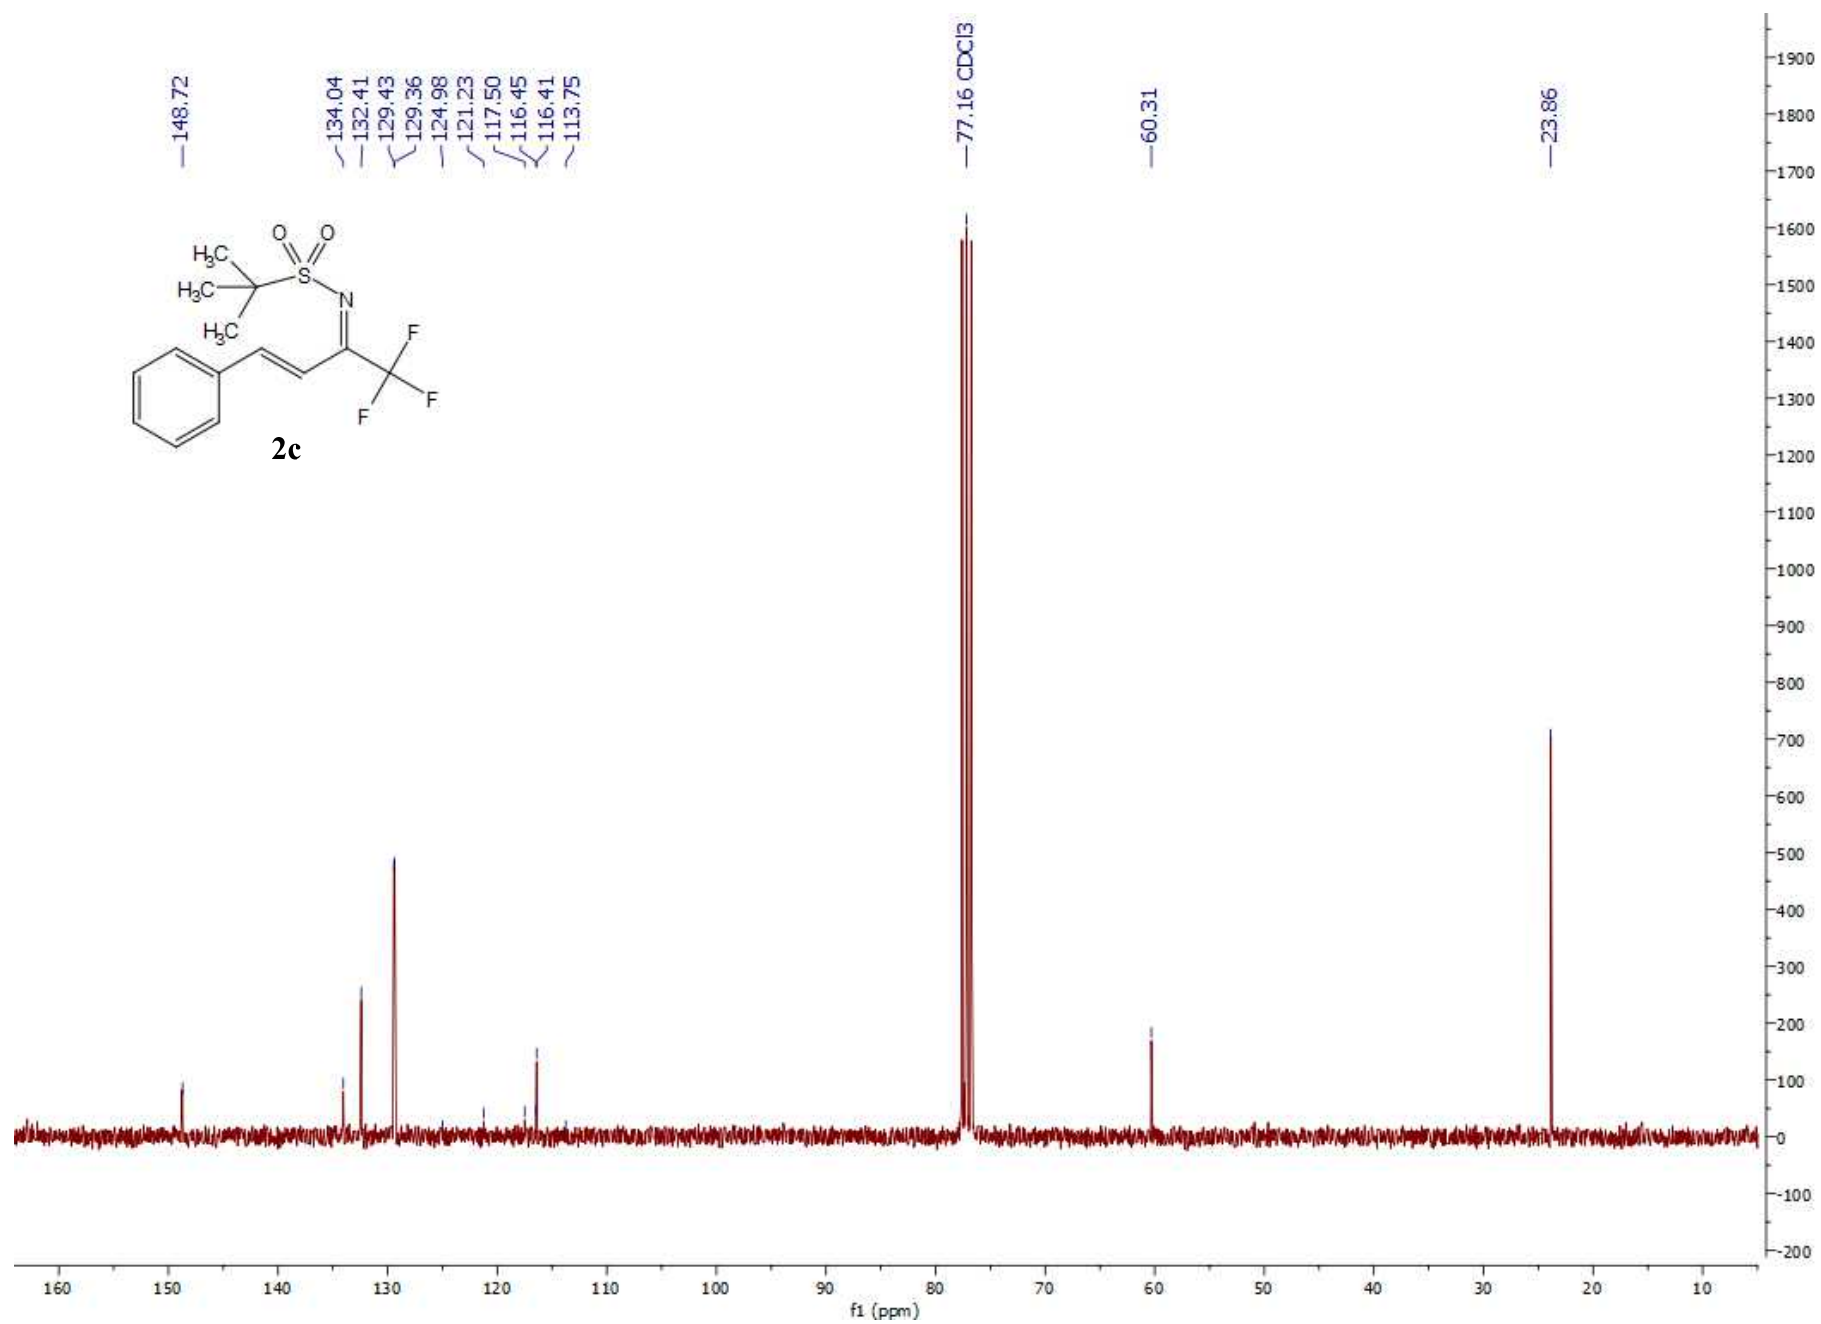

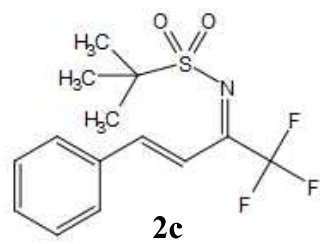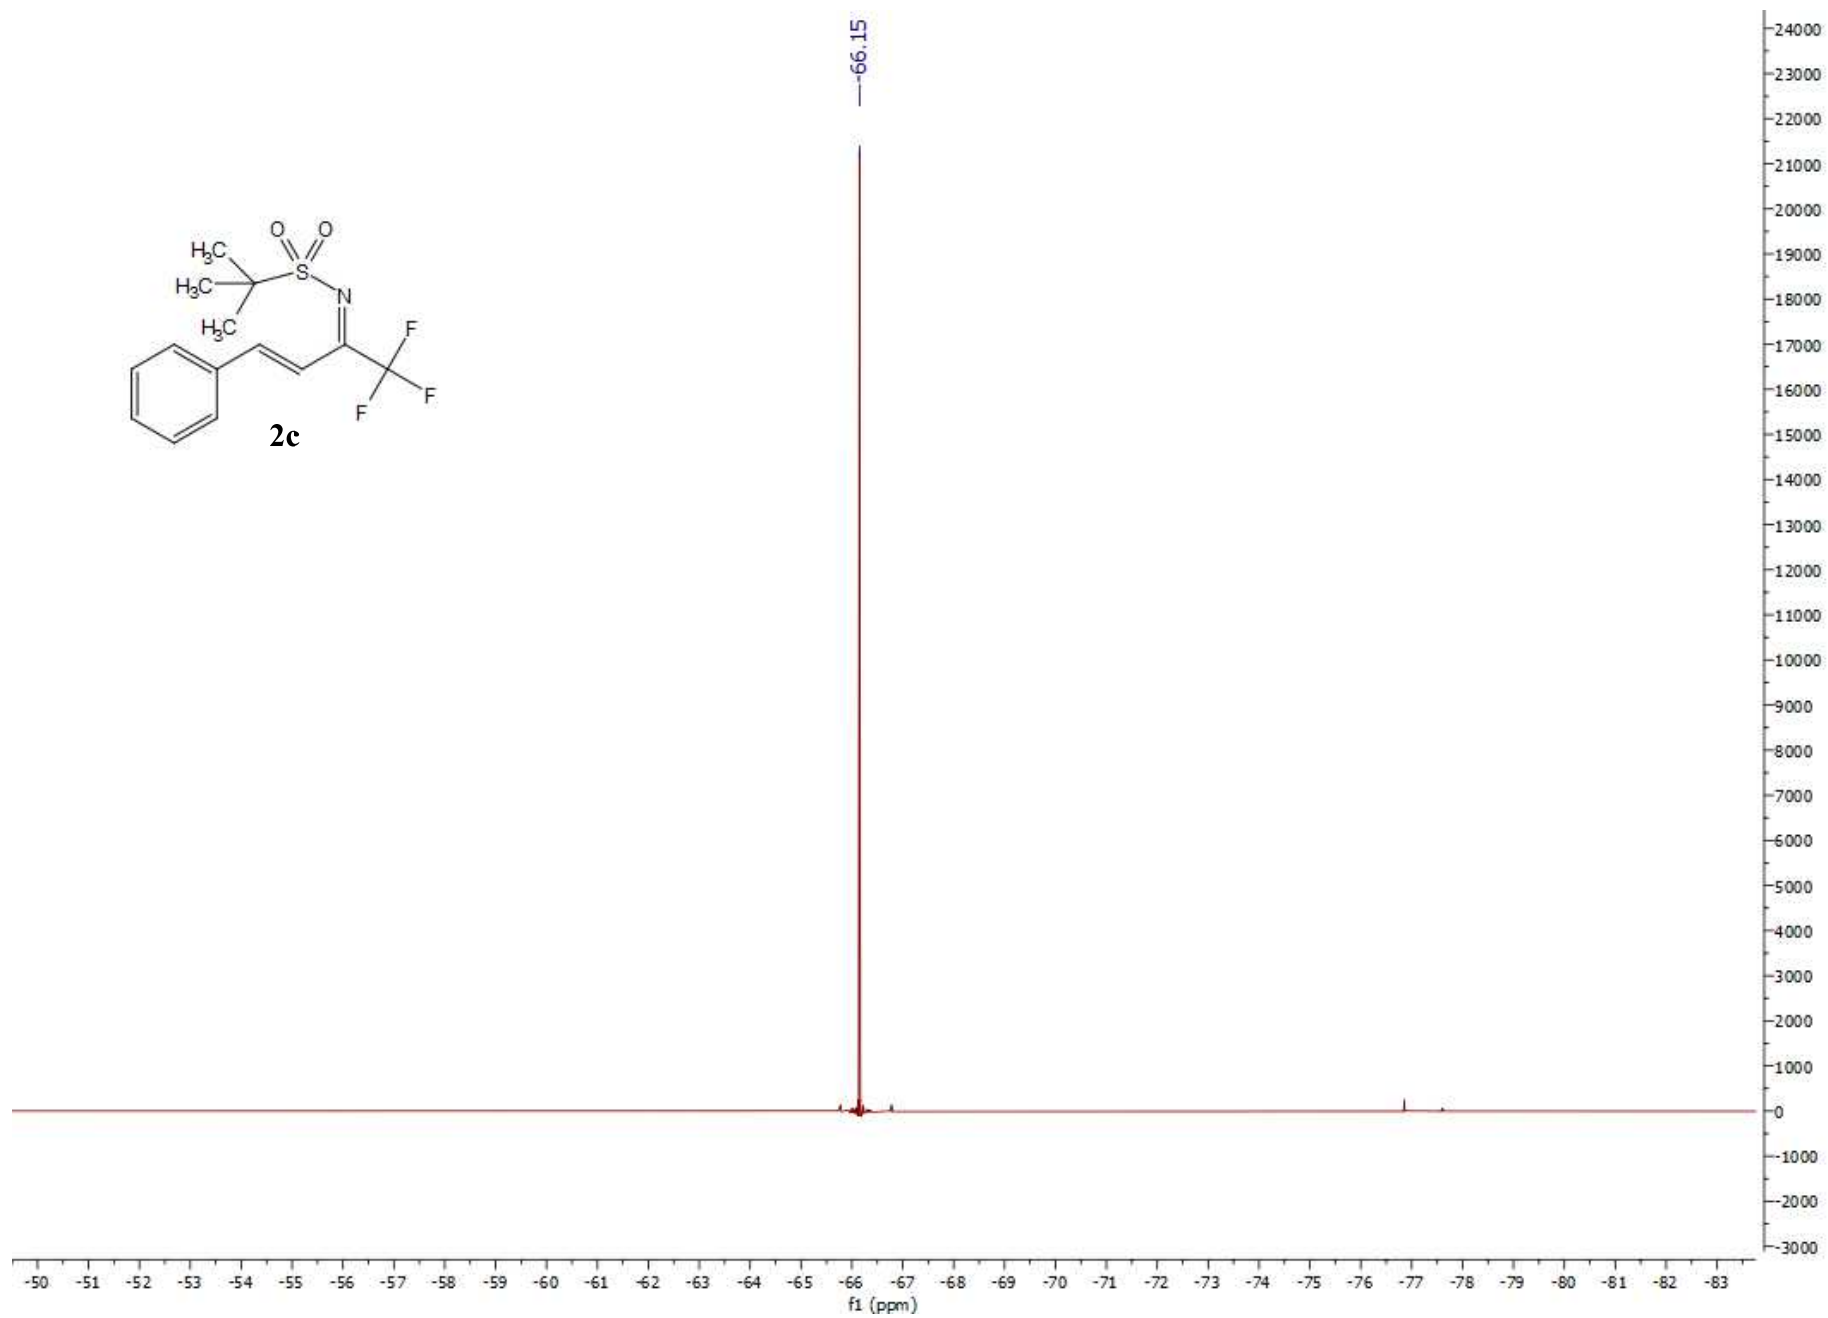

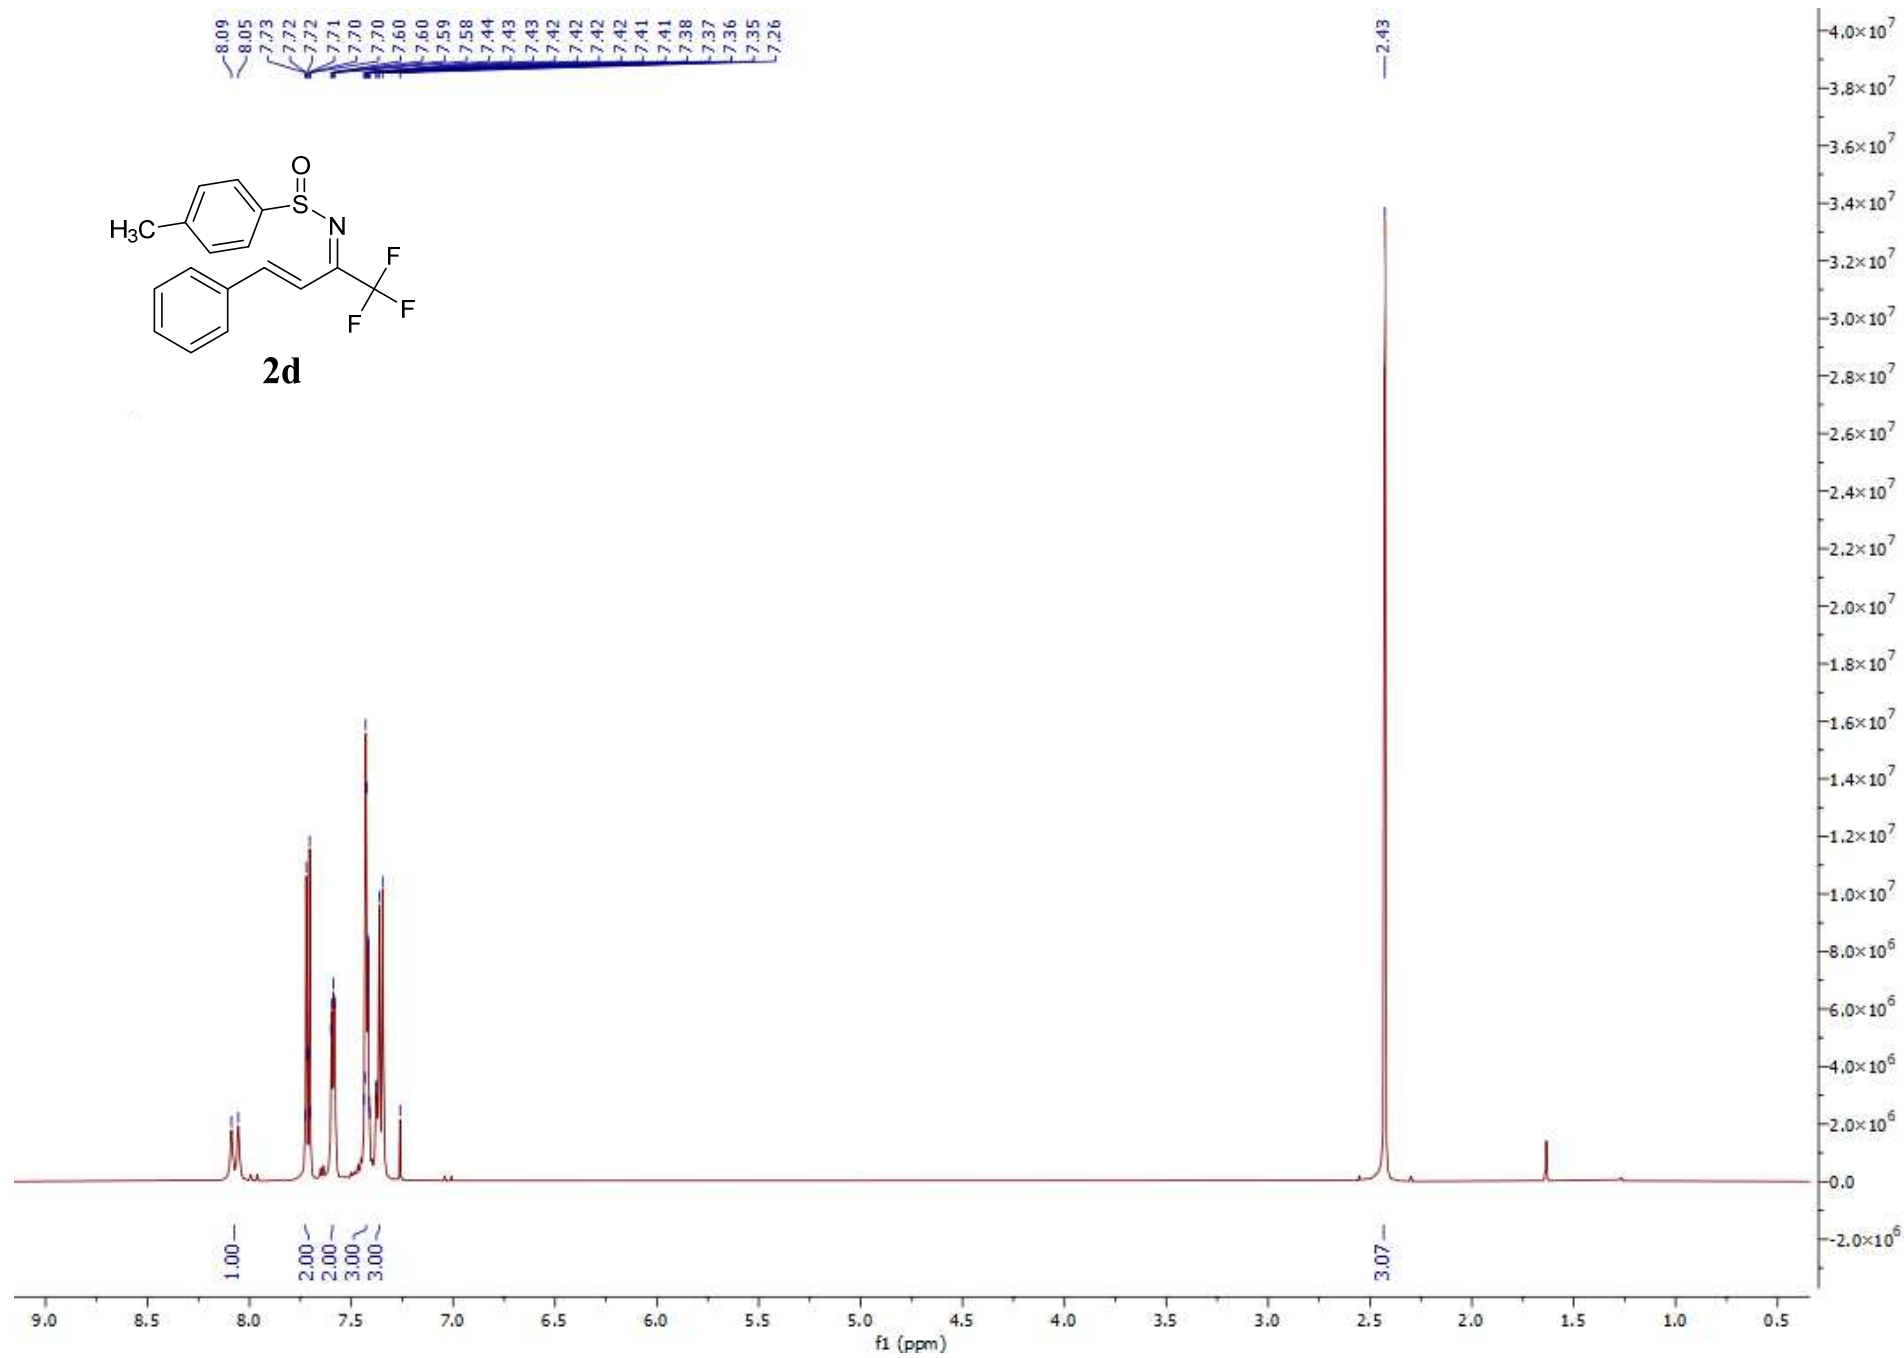

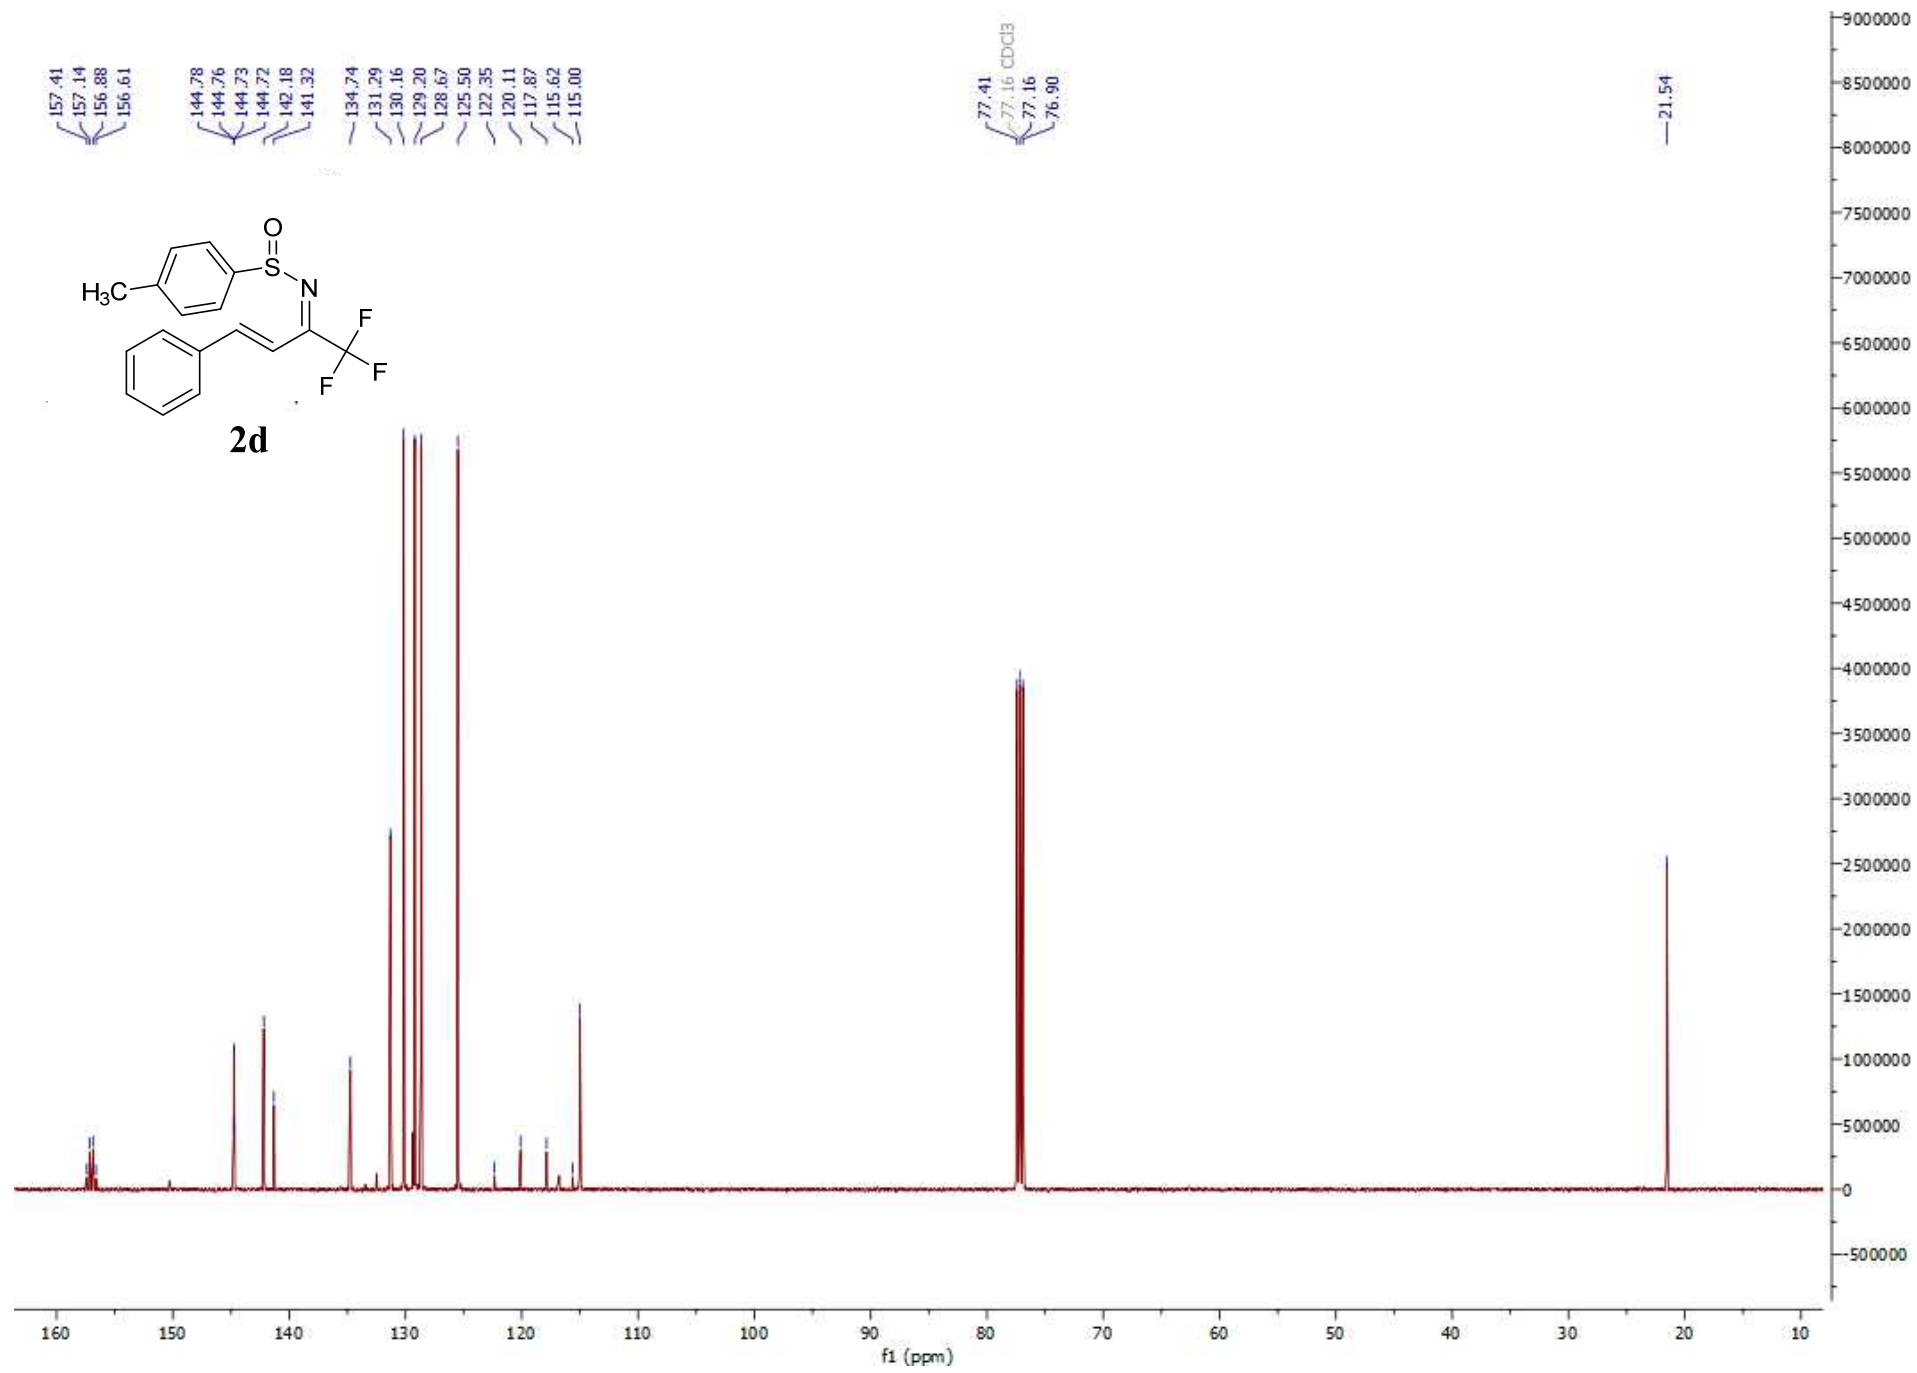



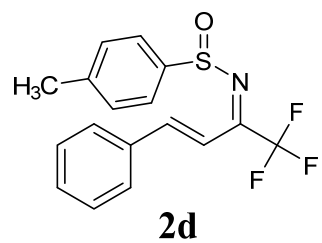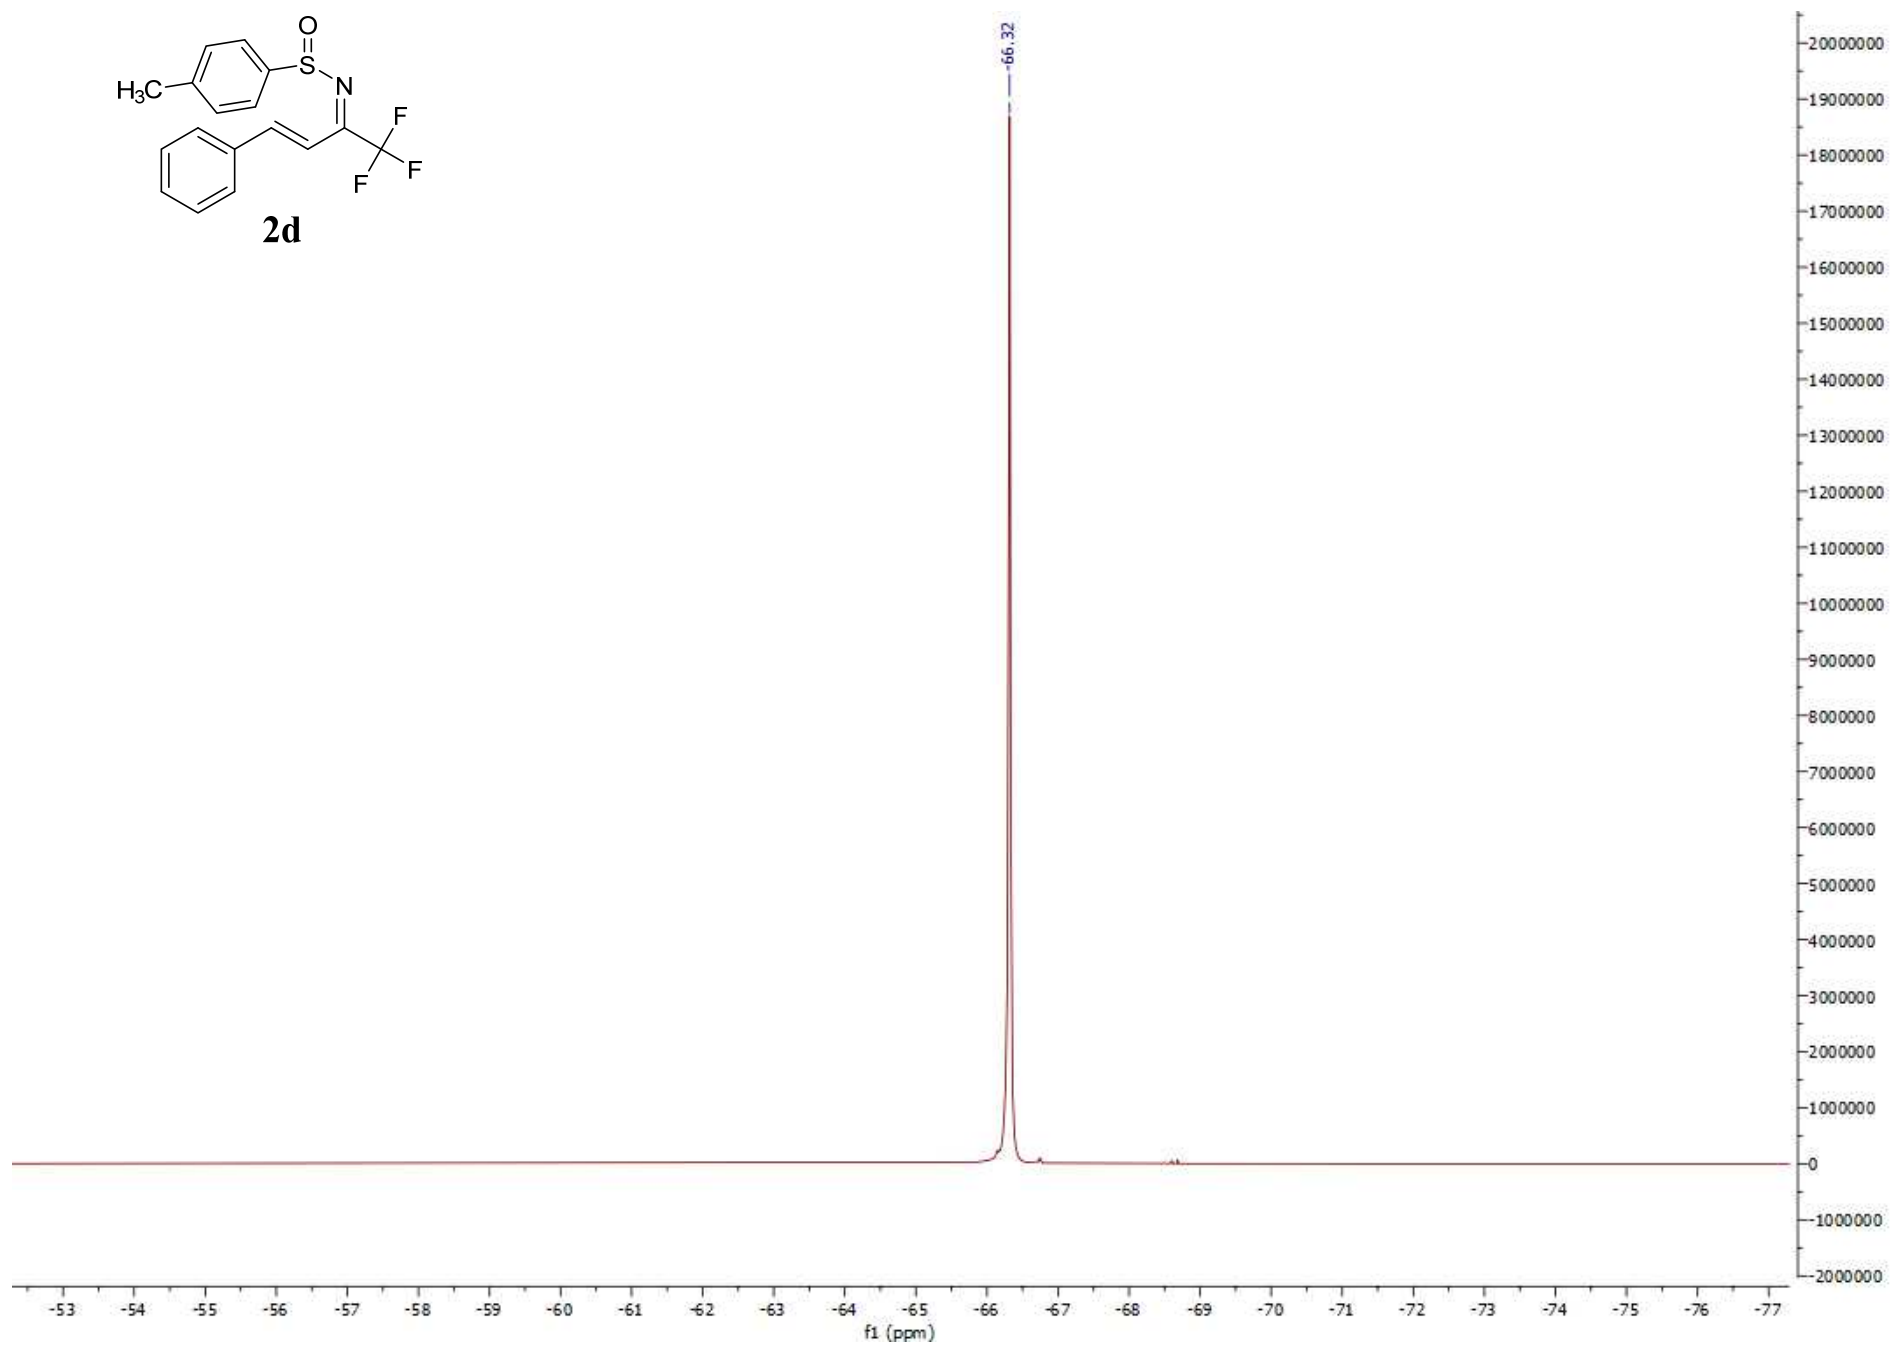

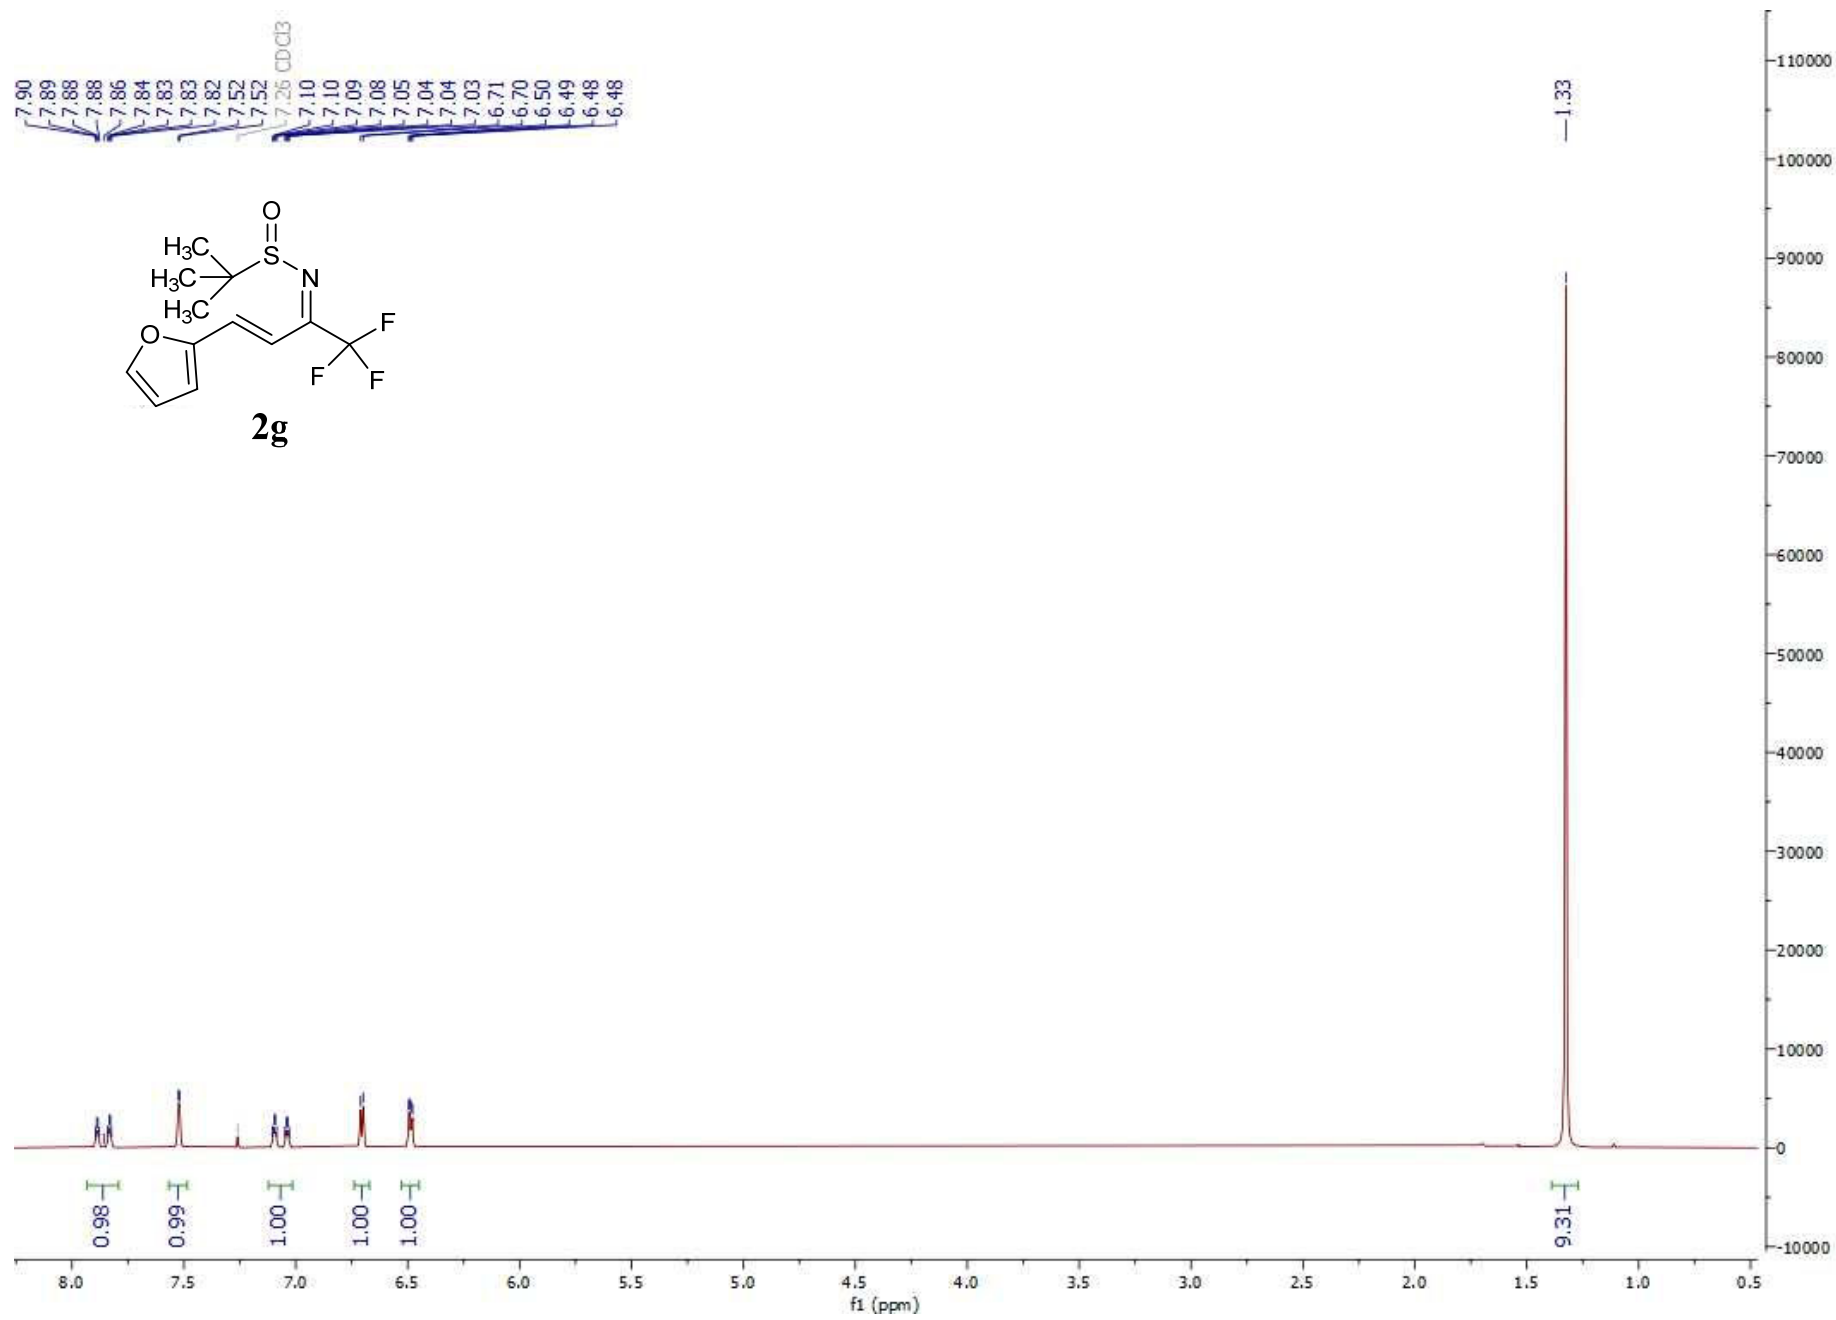

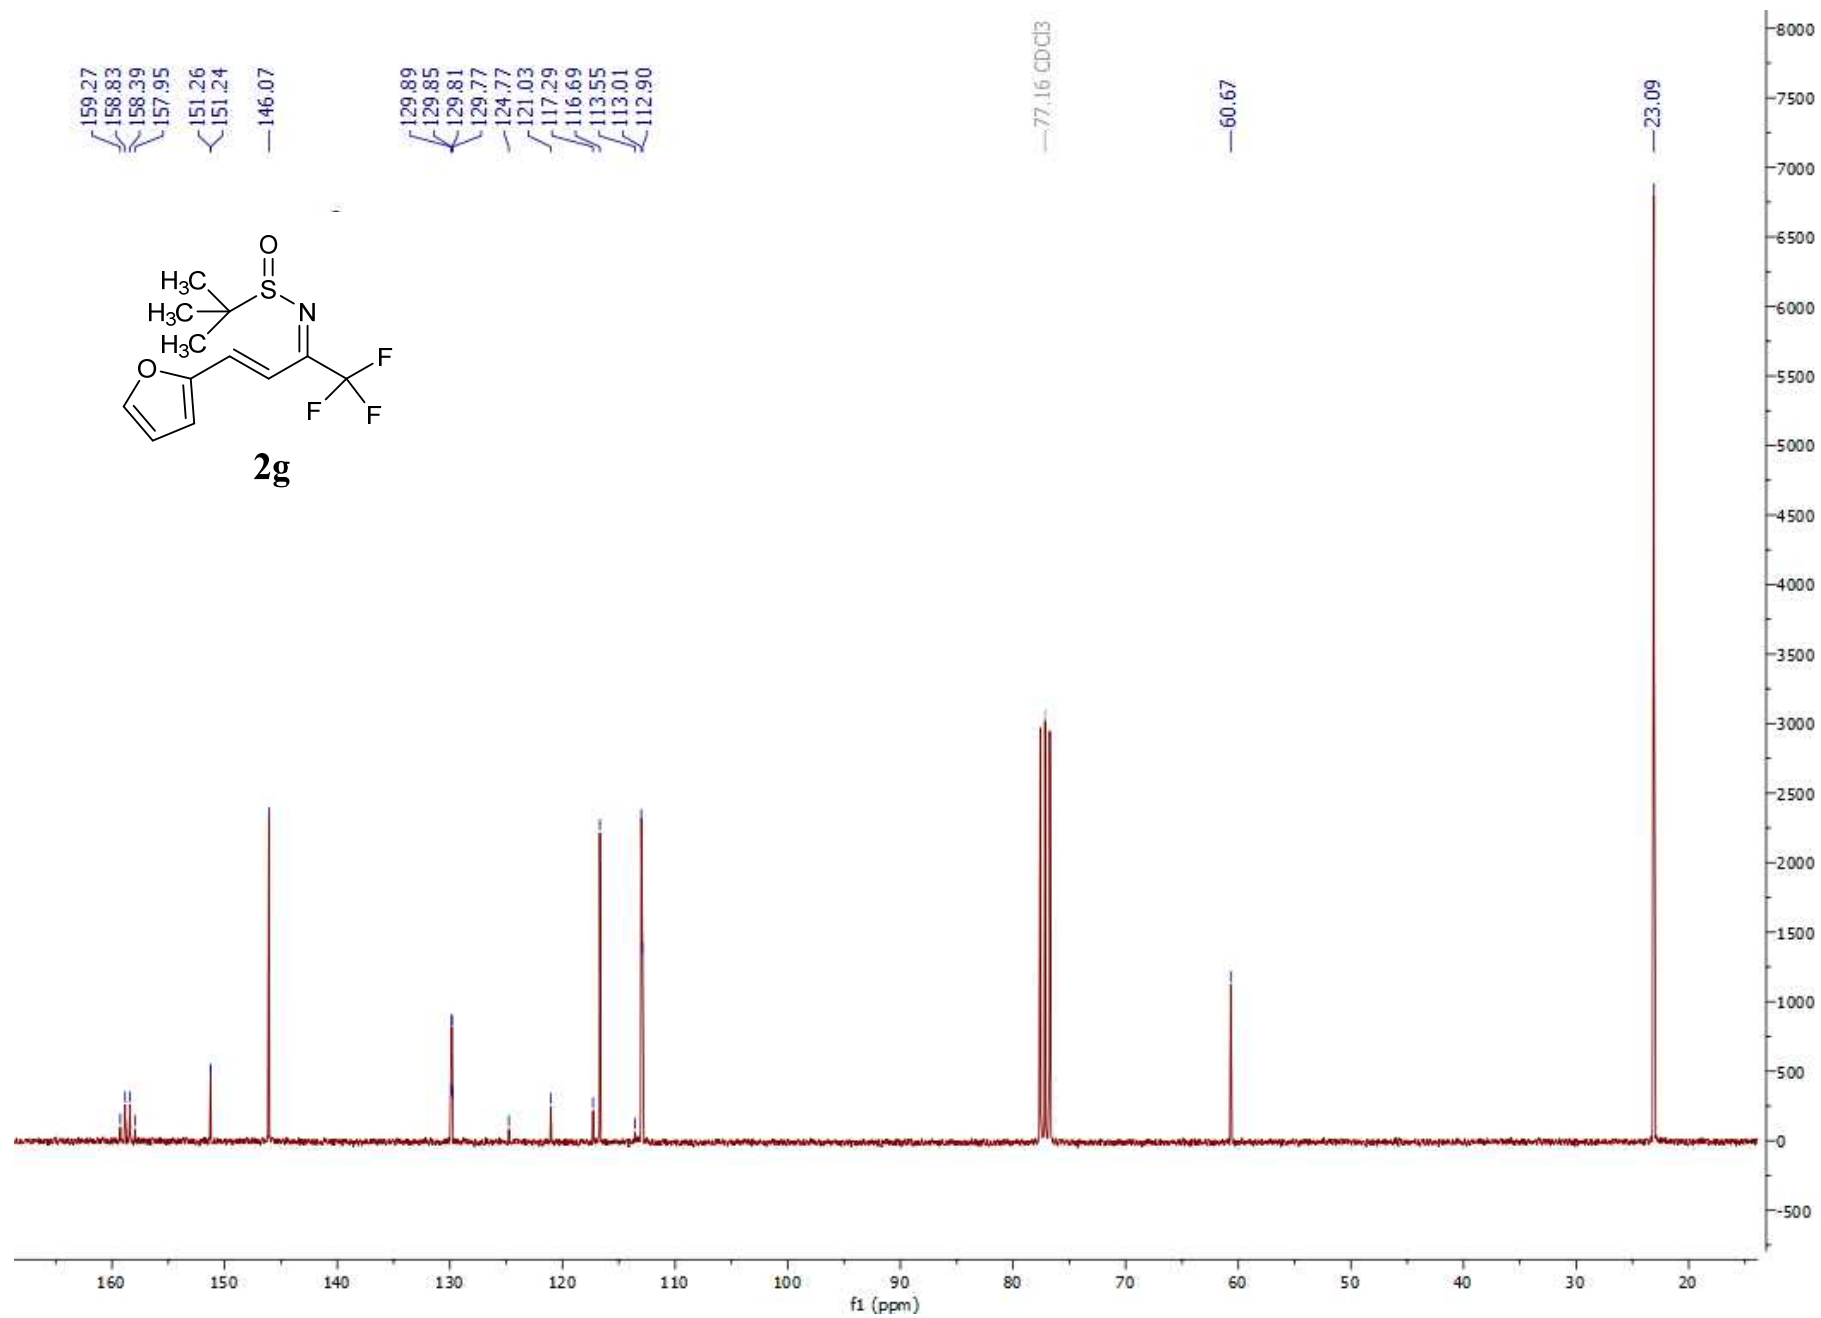

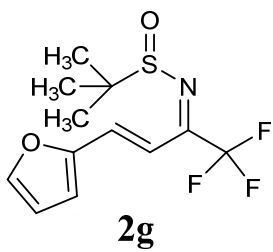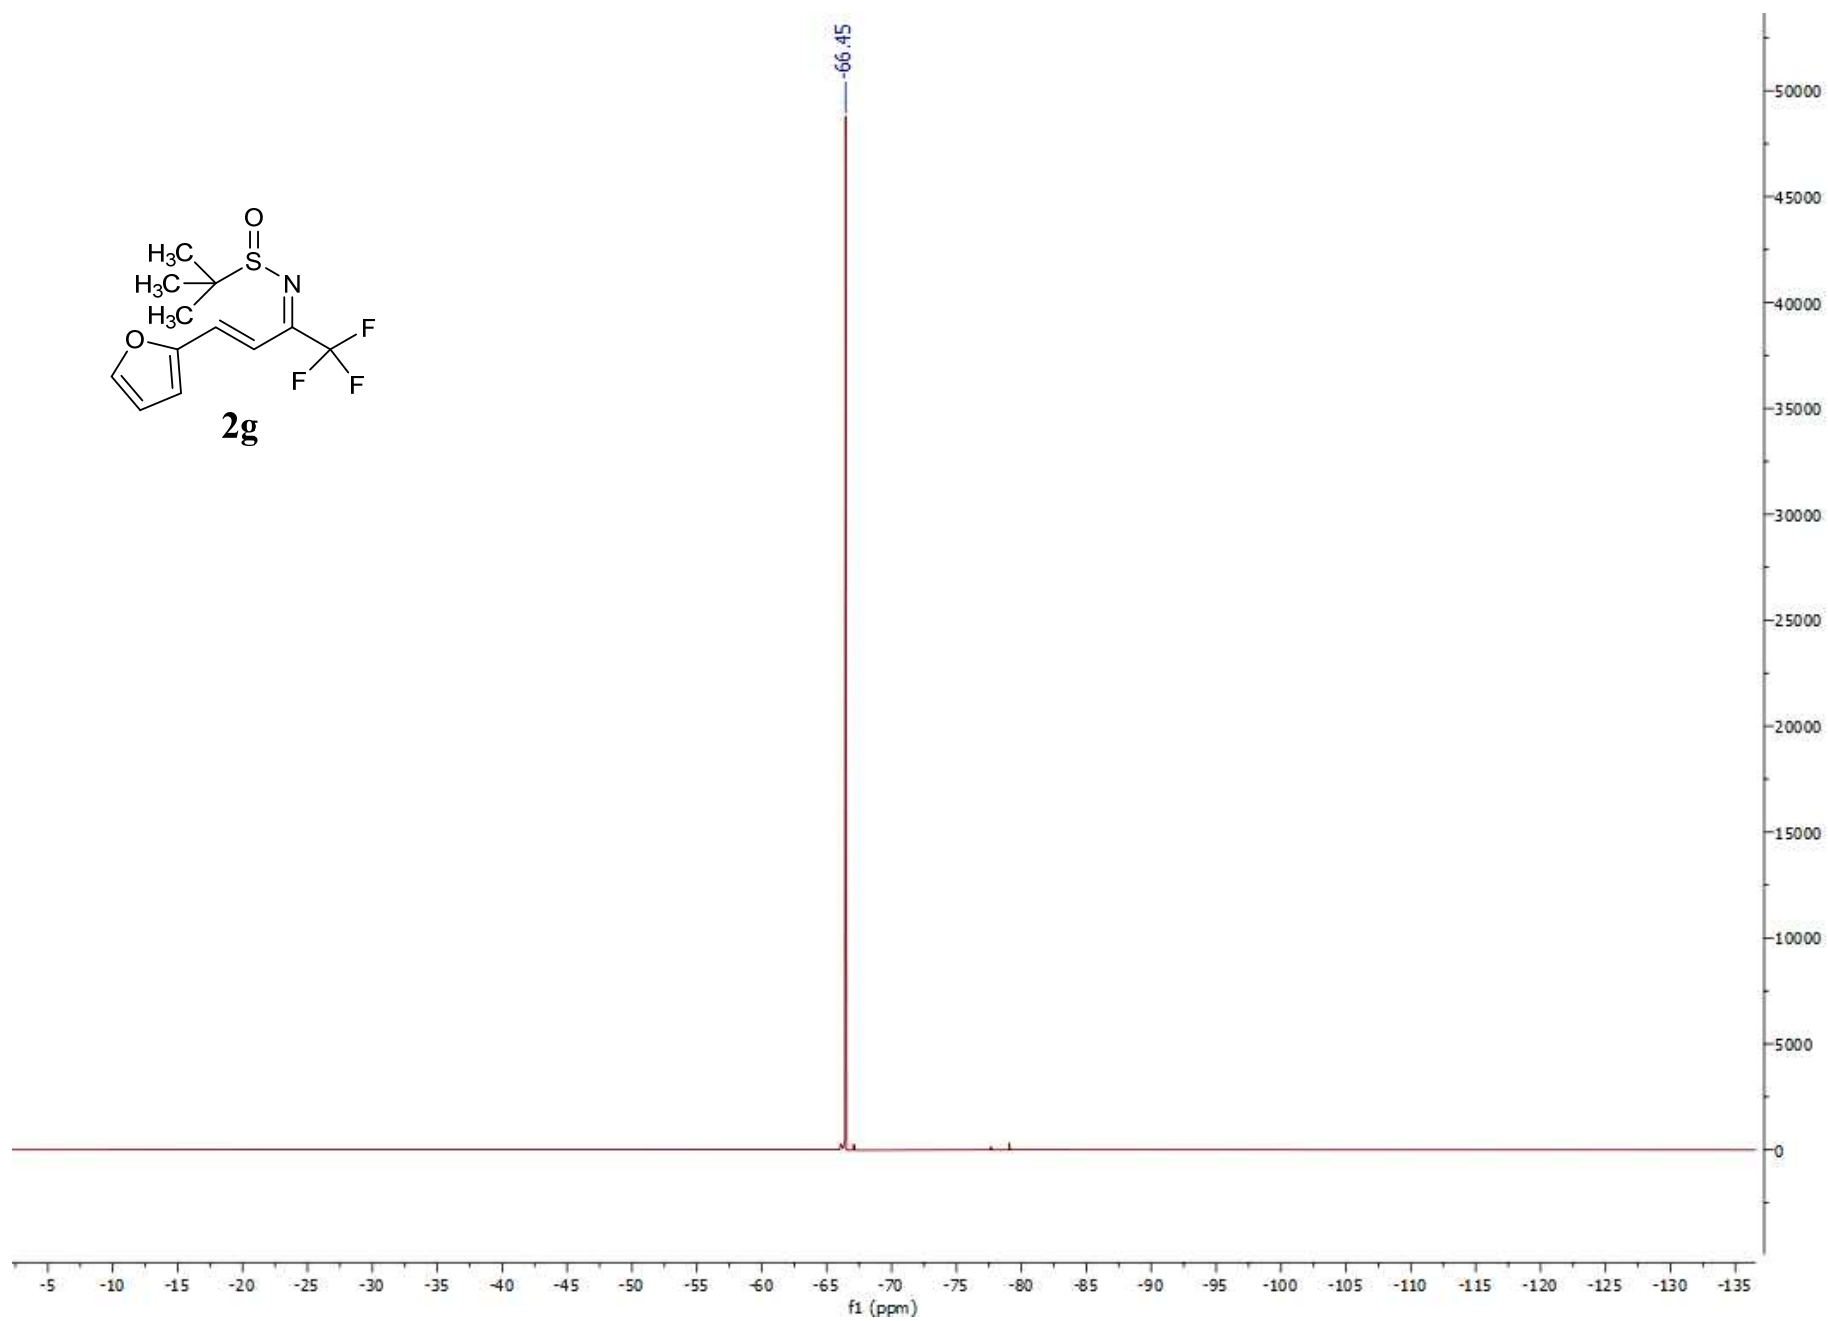

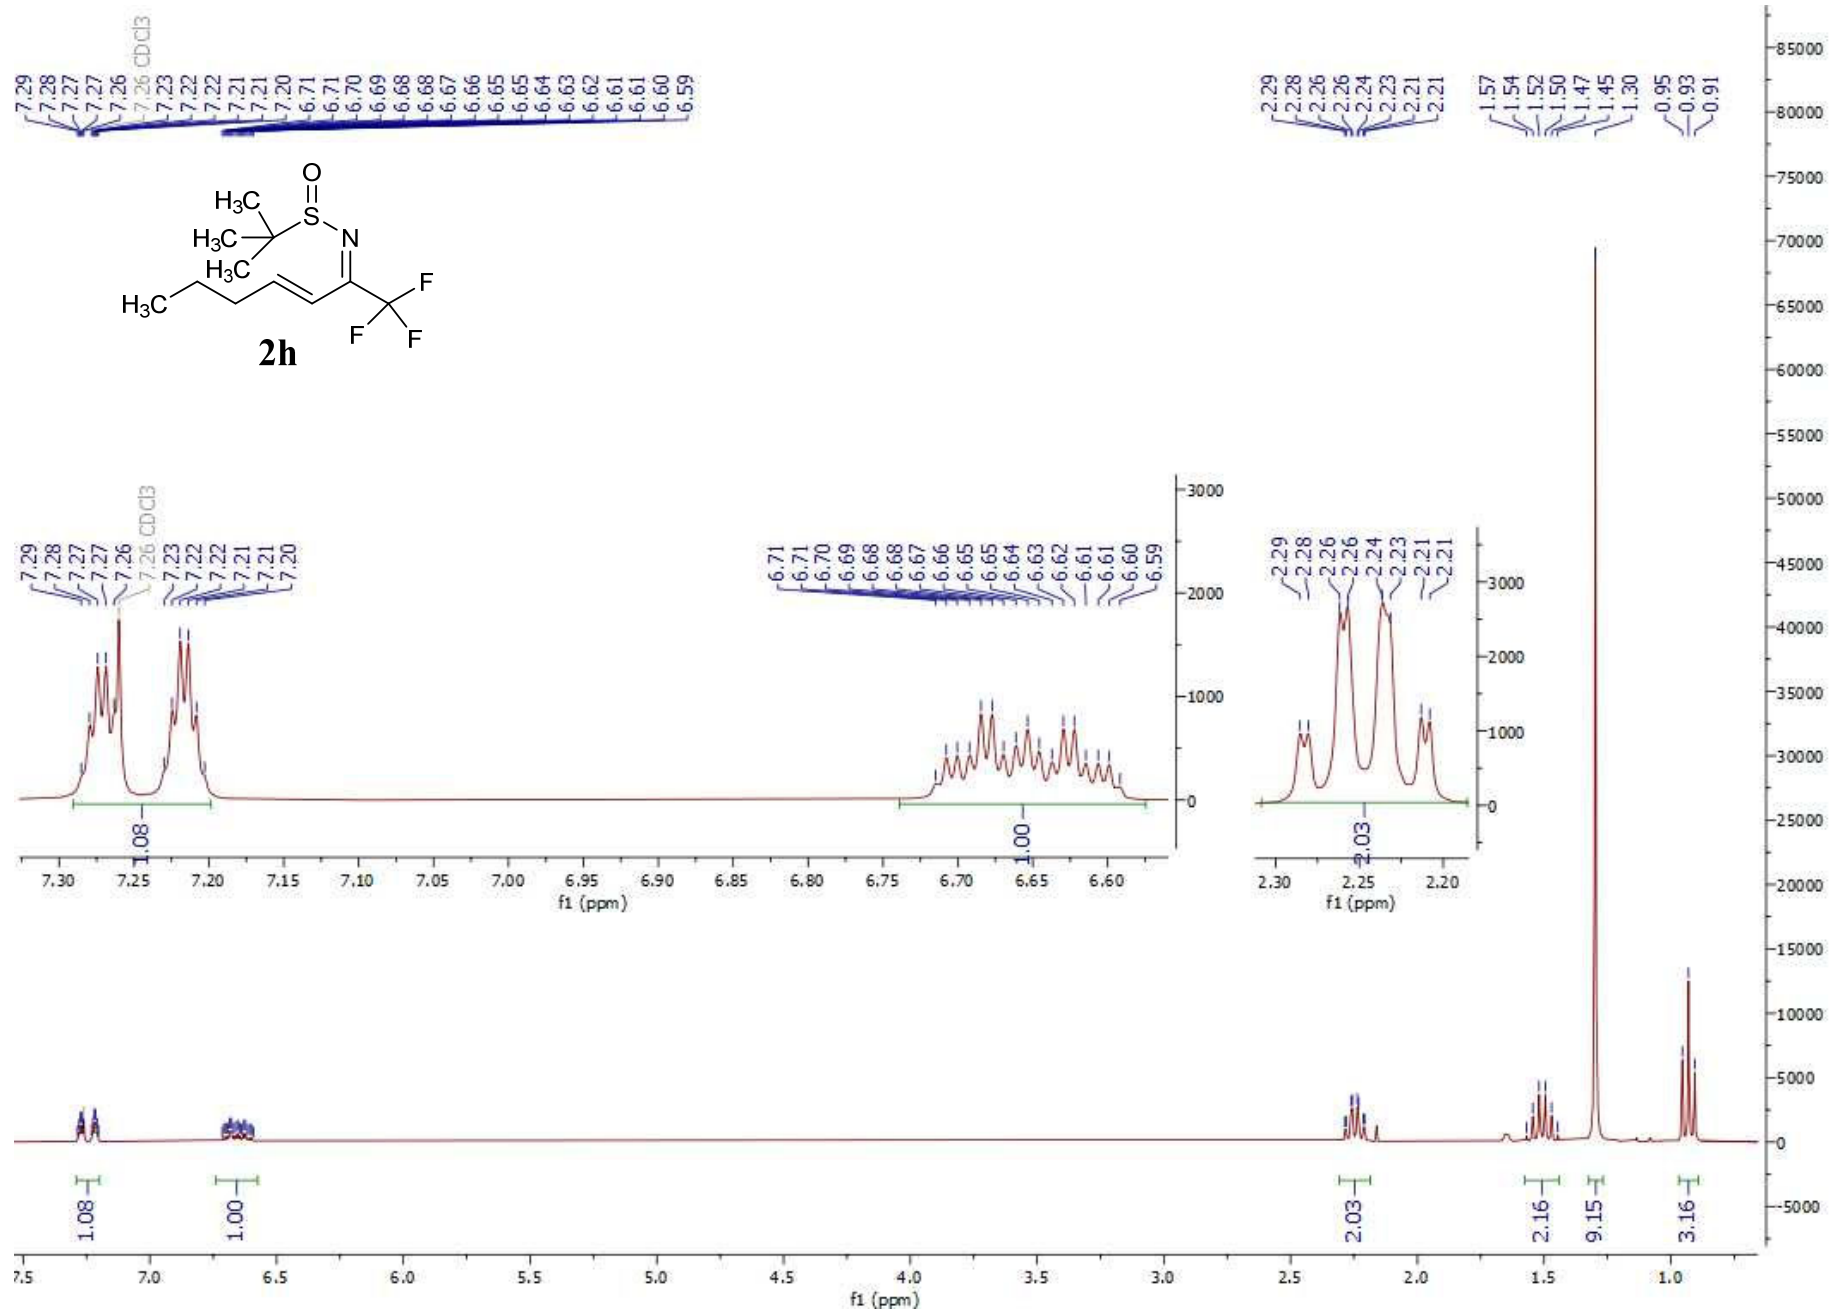

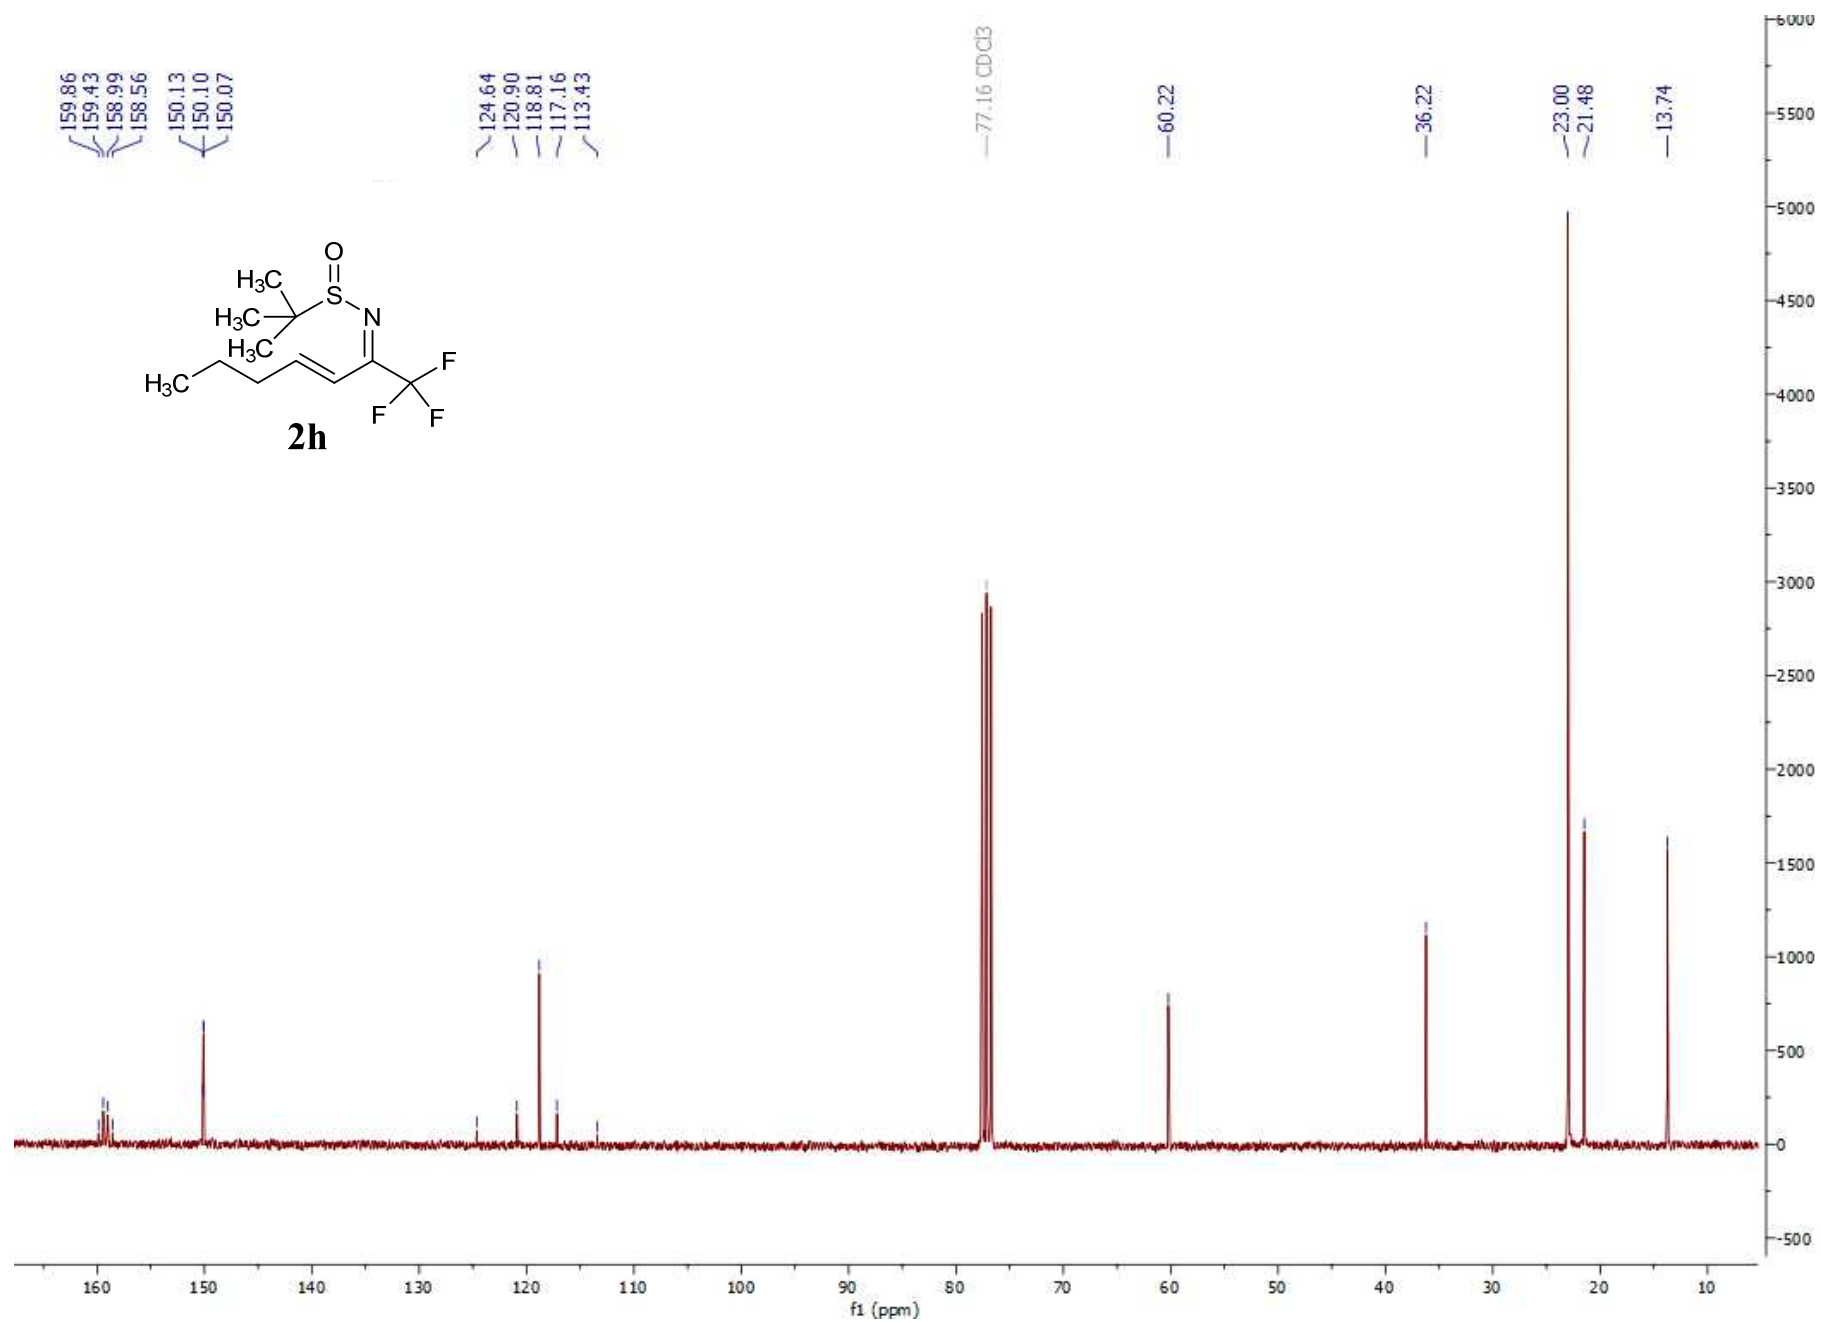

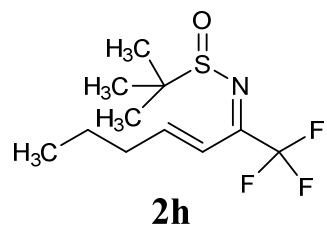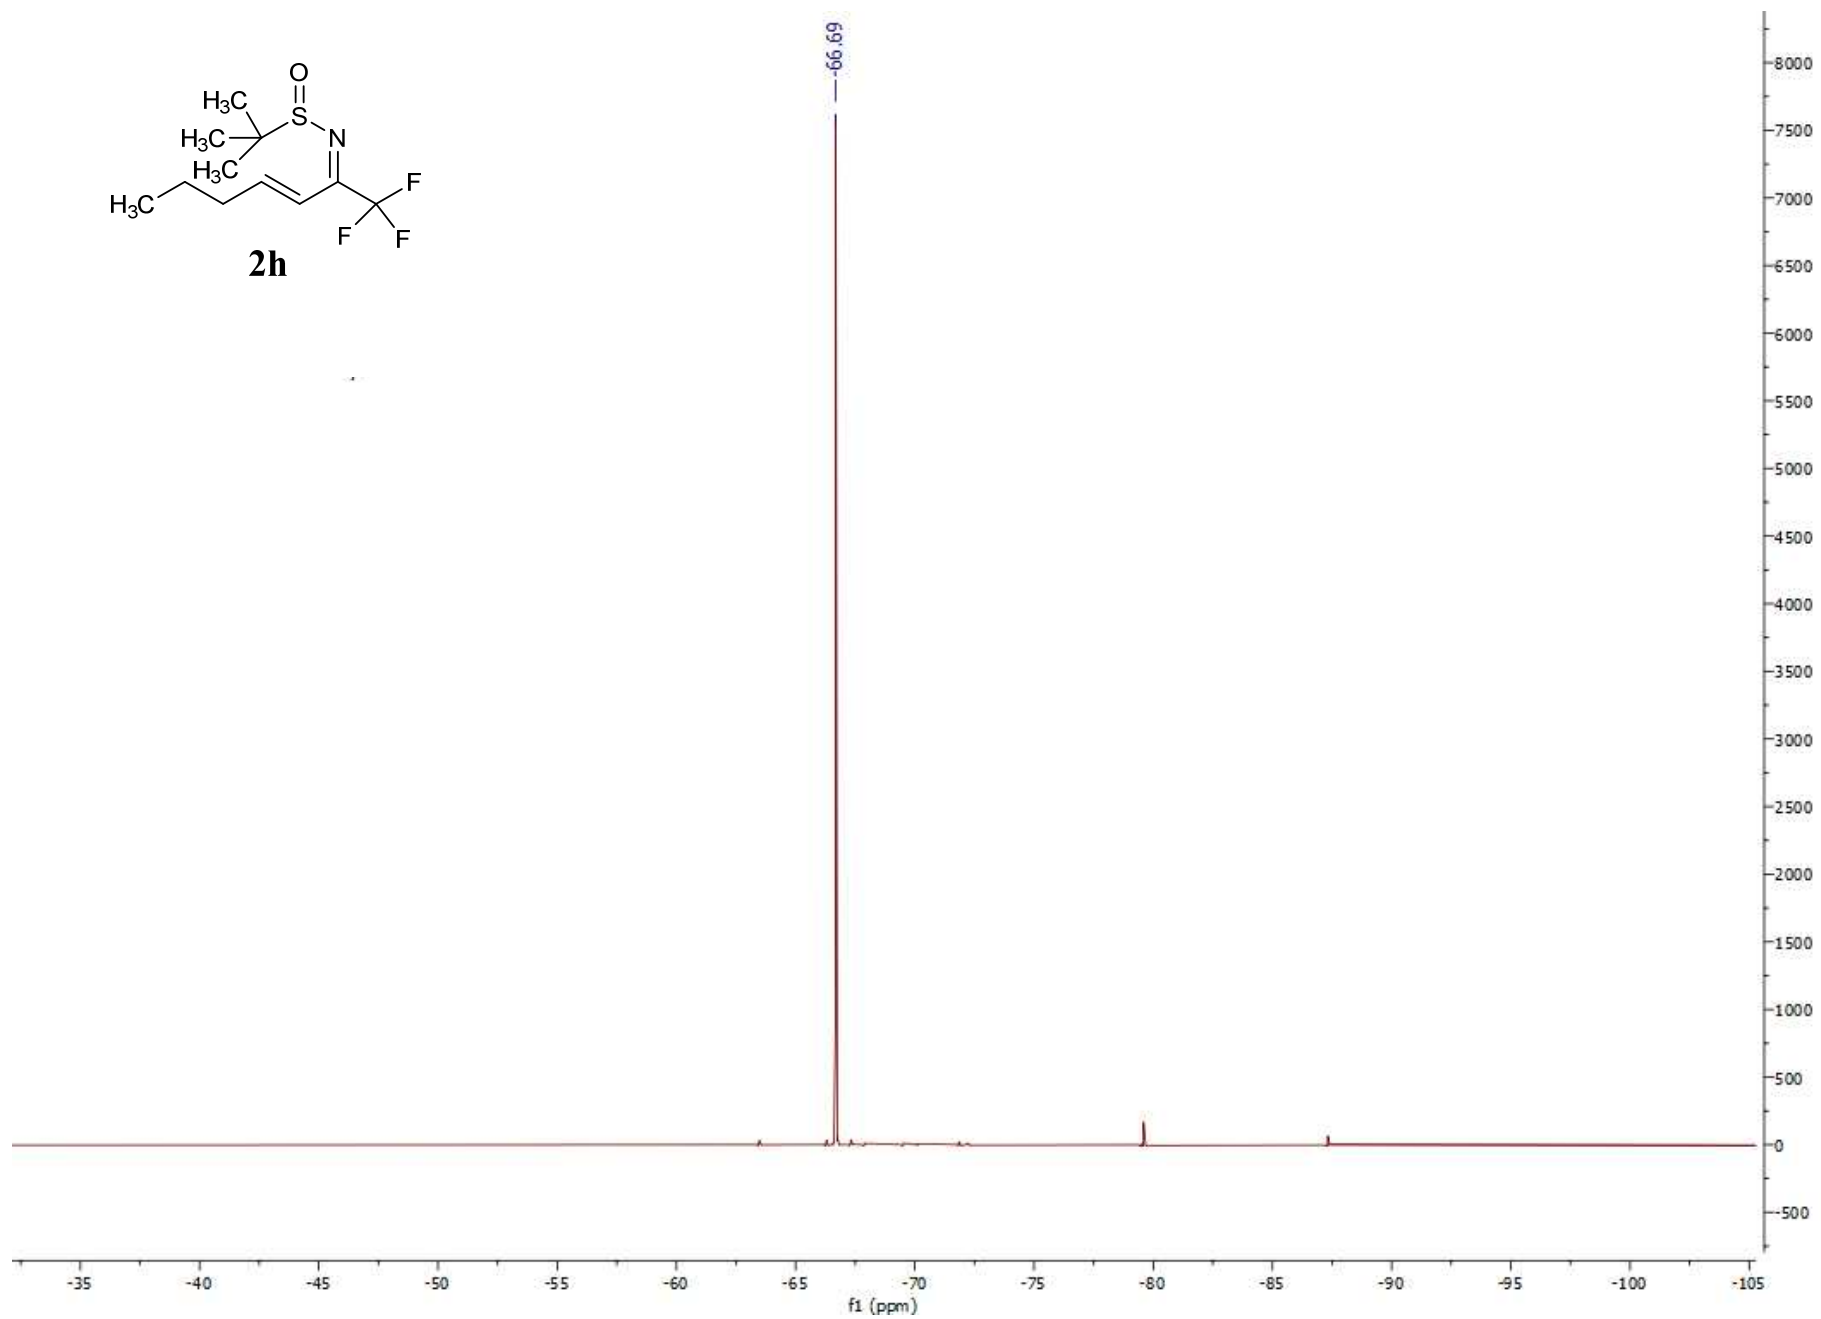

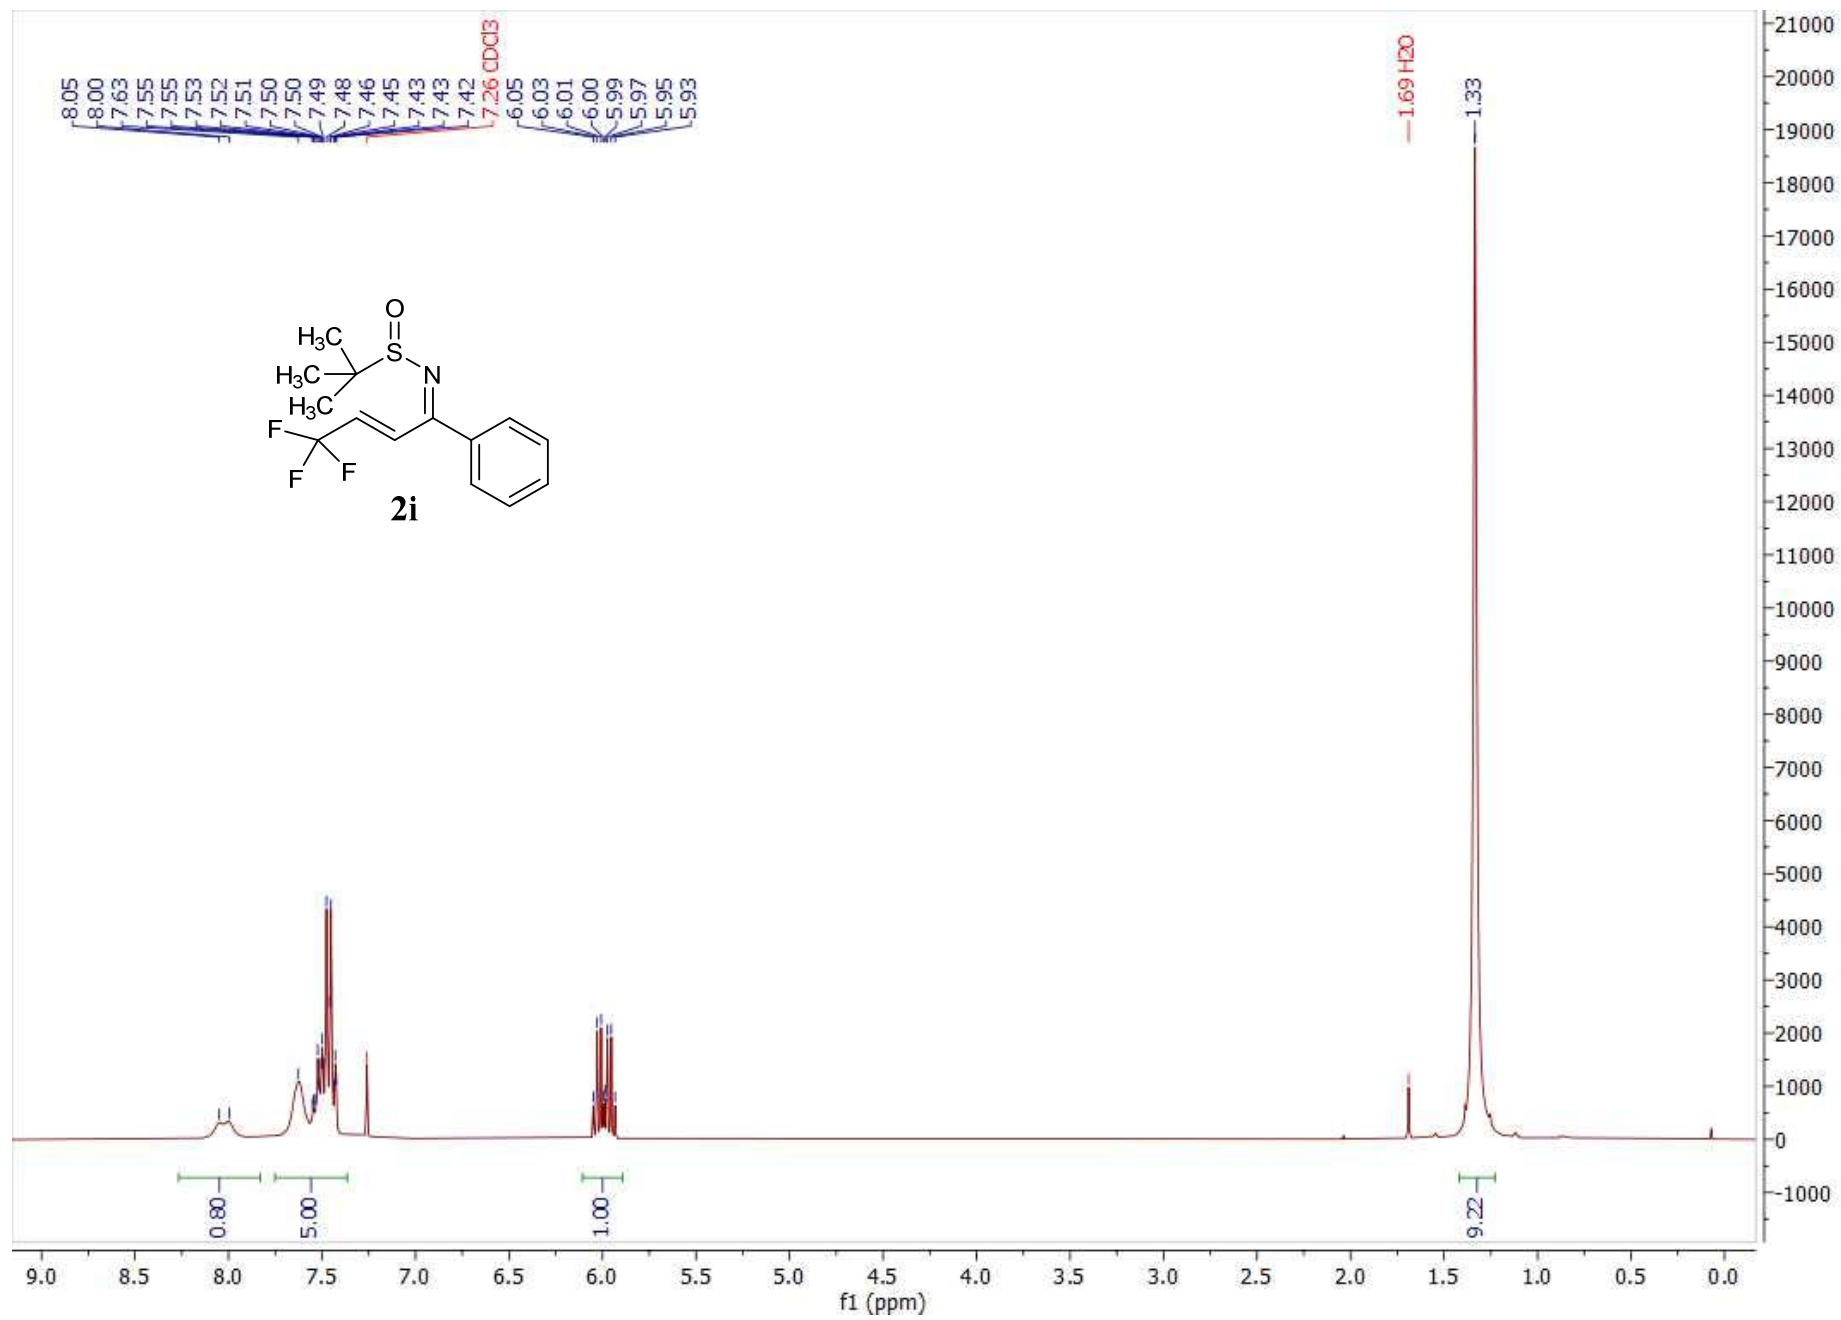



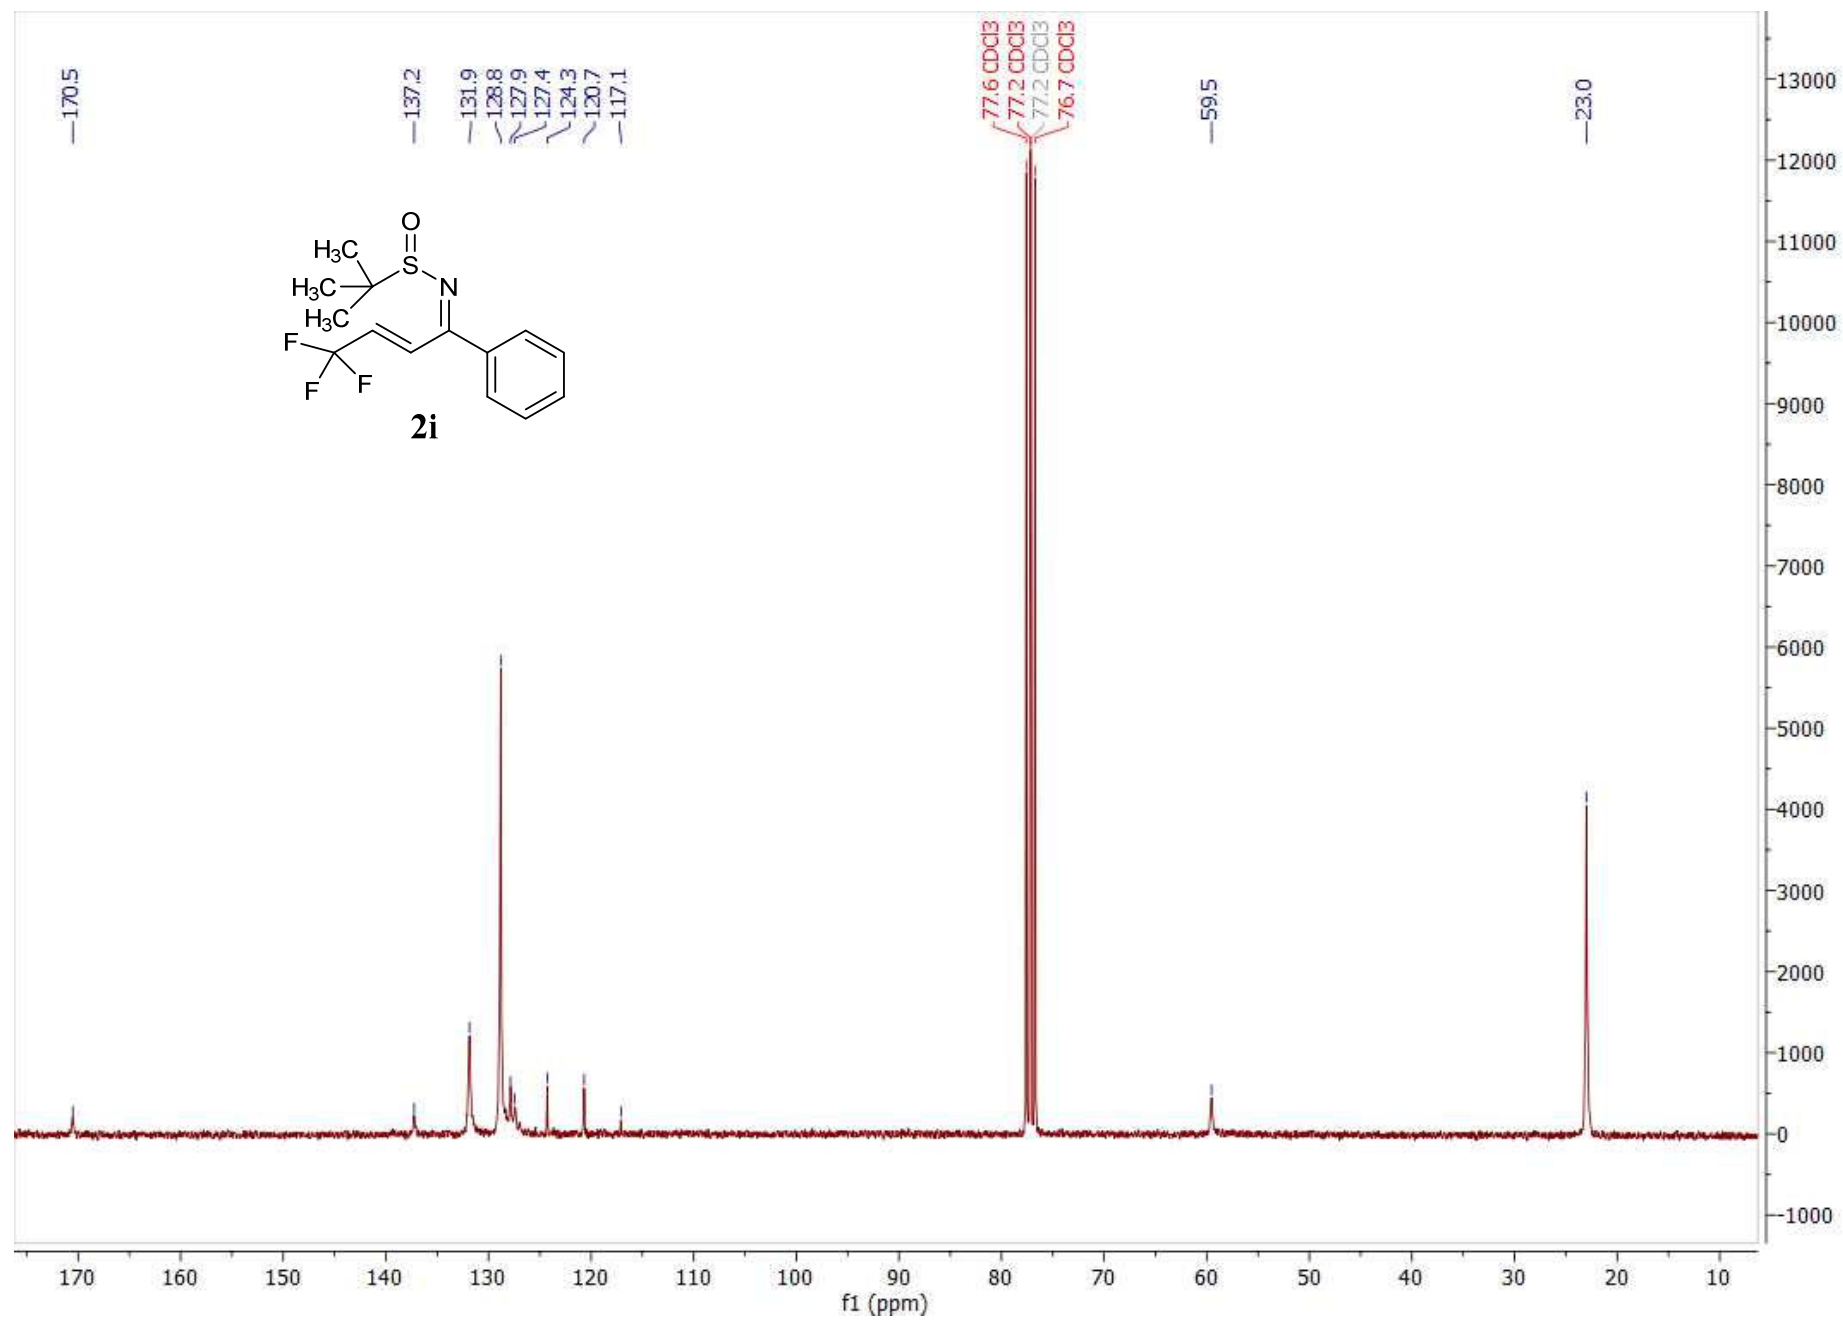

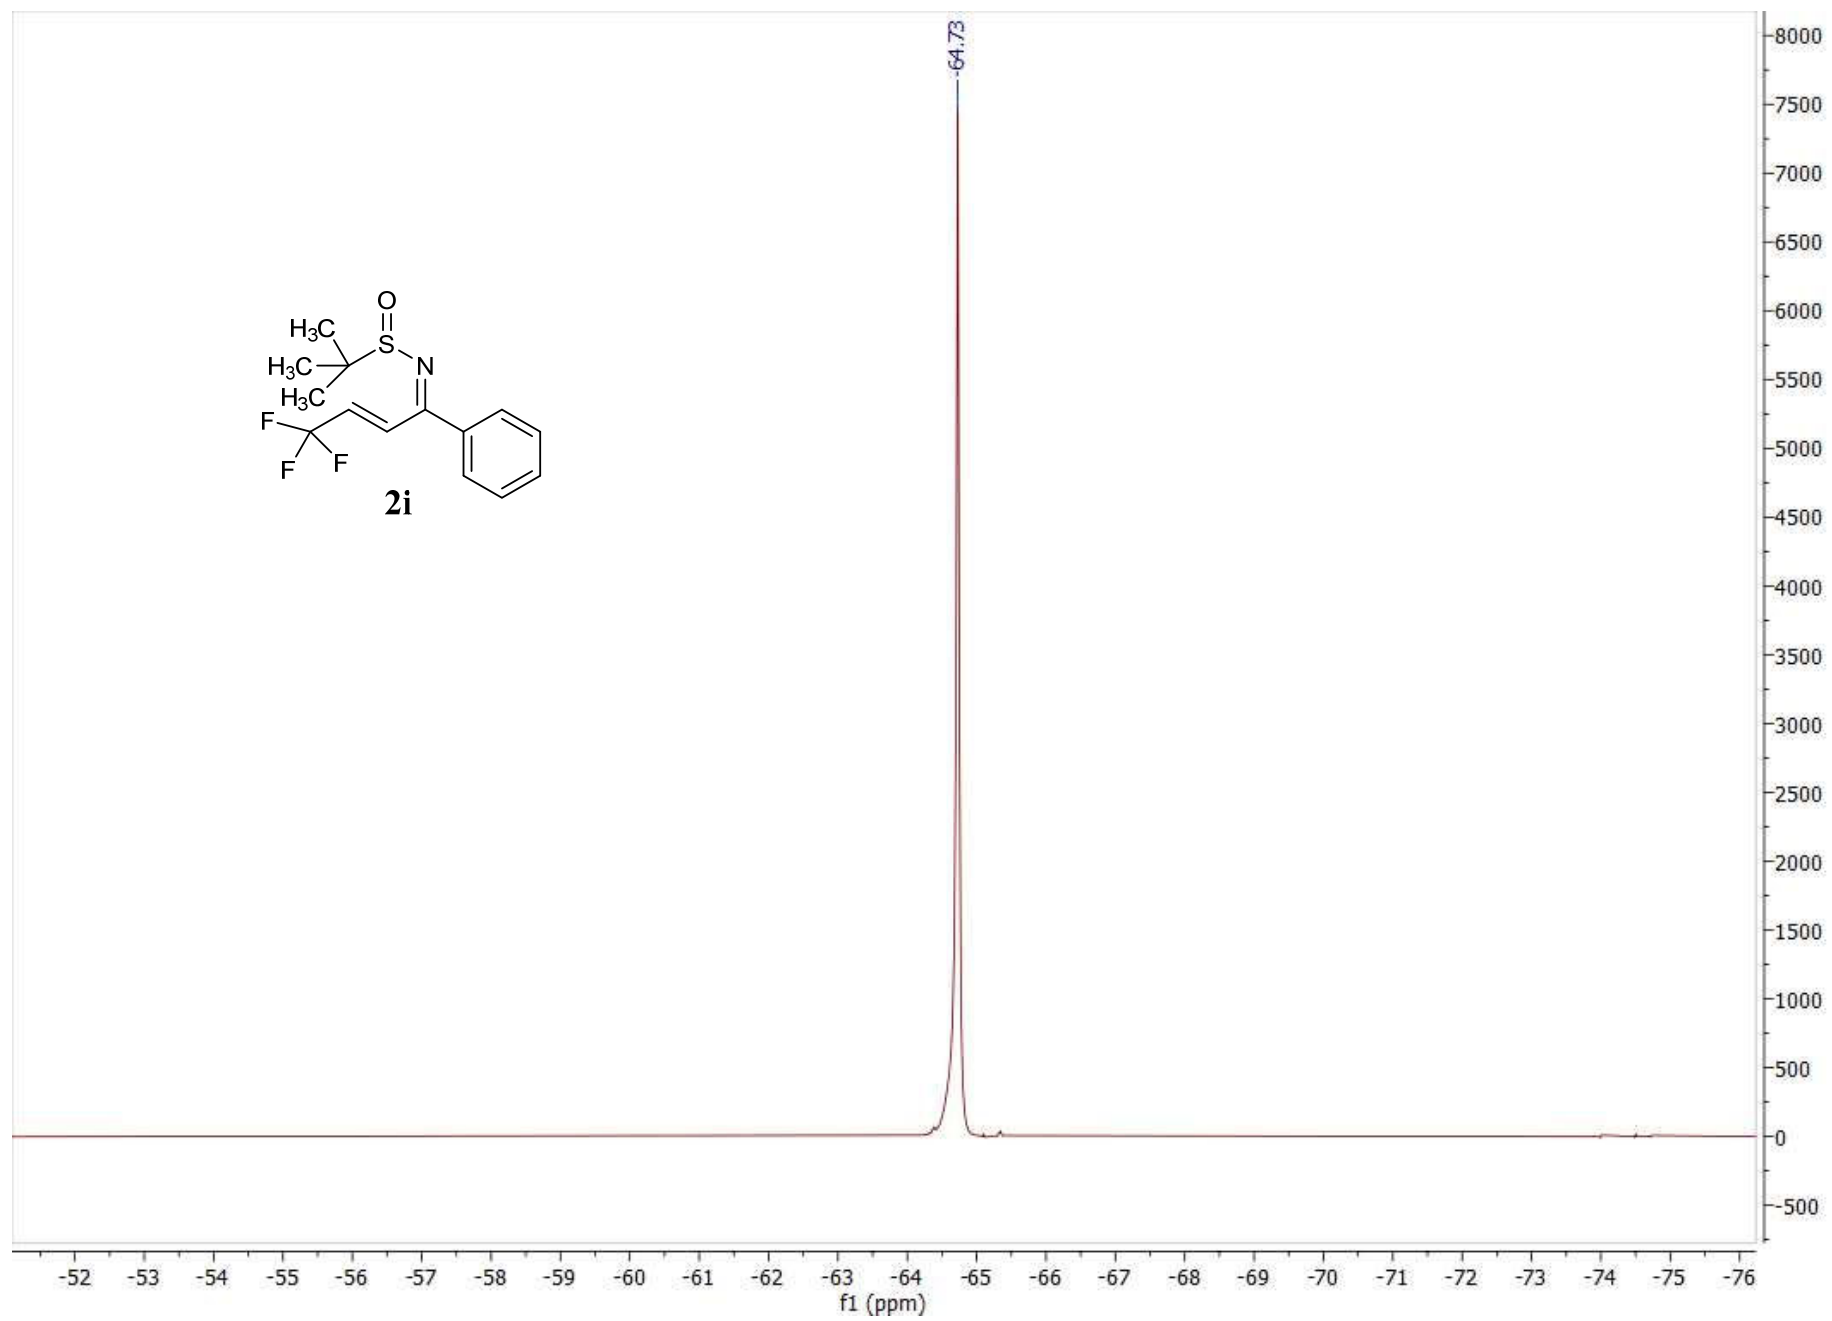

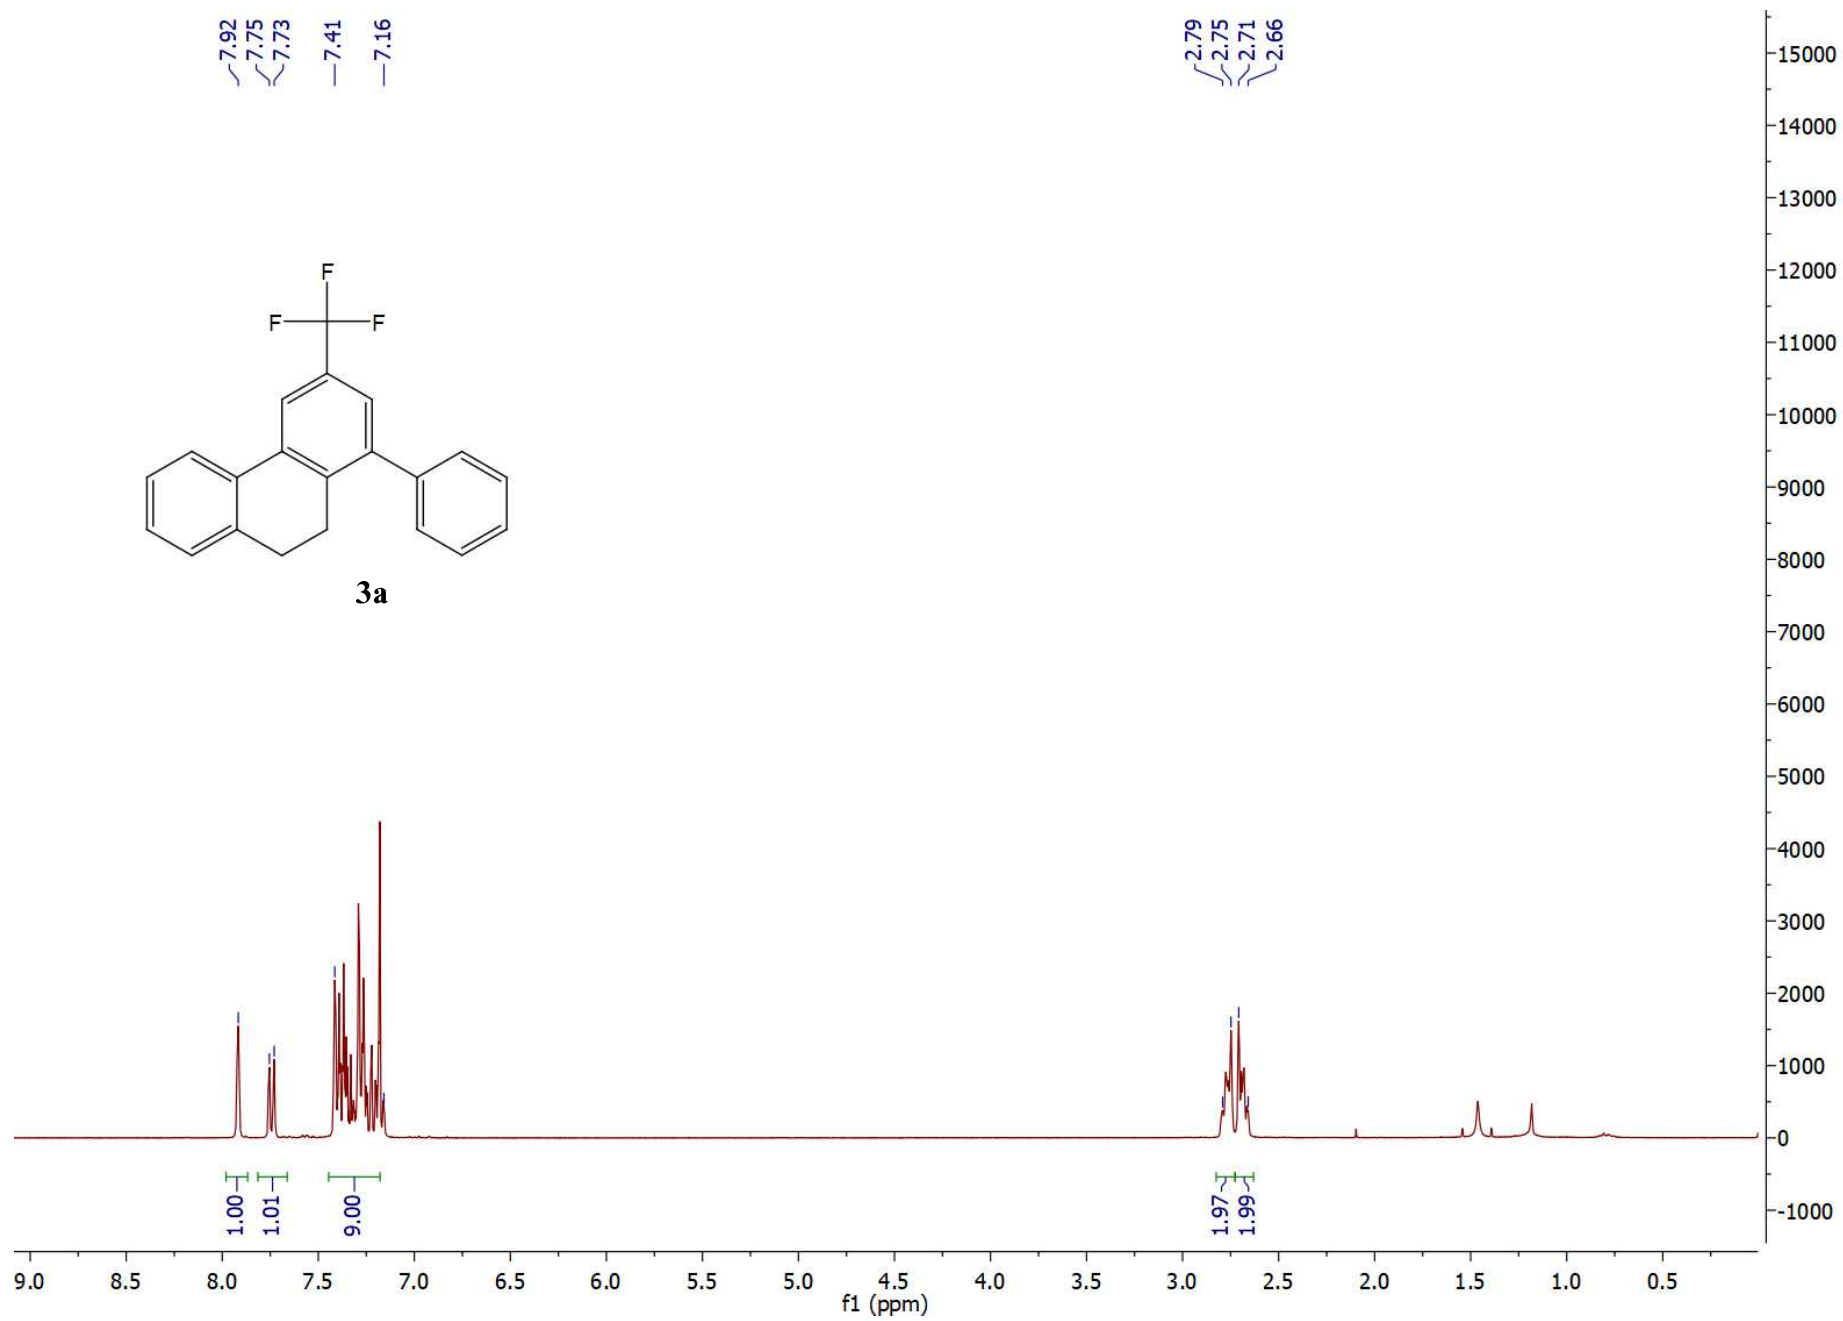



S65

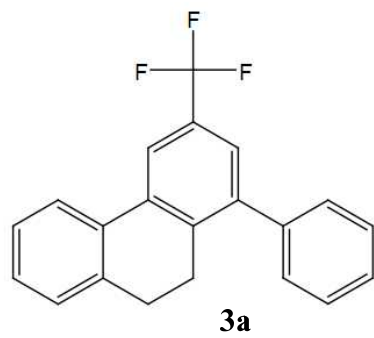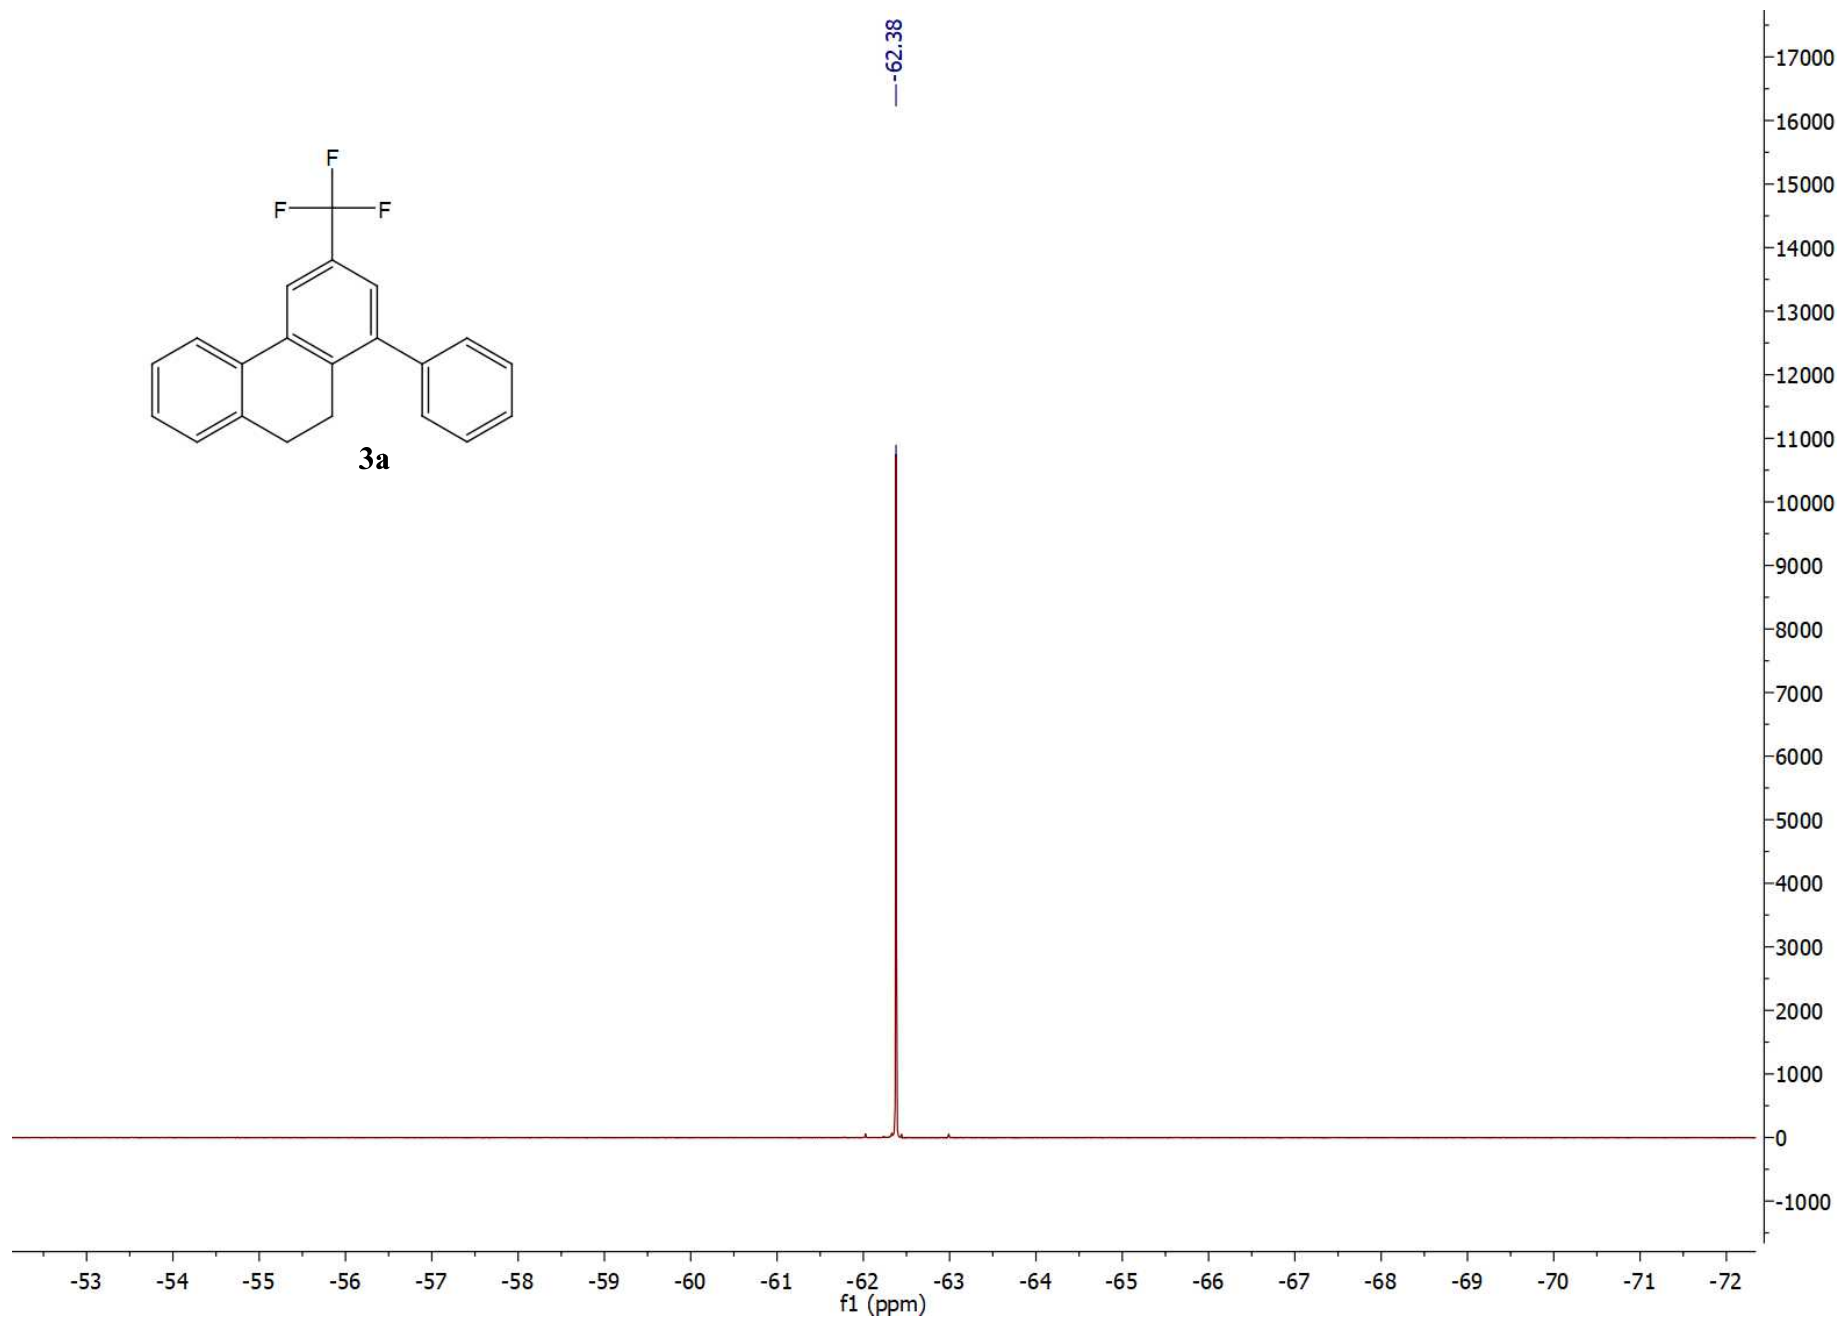

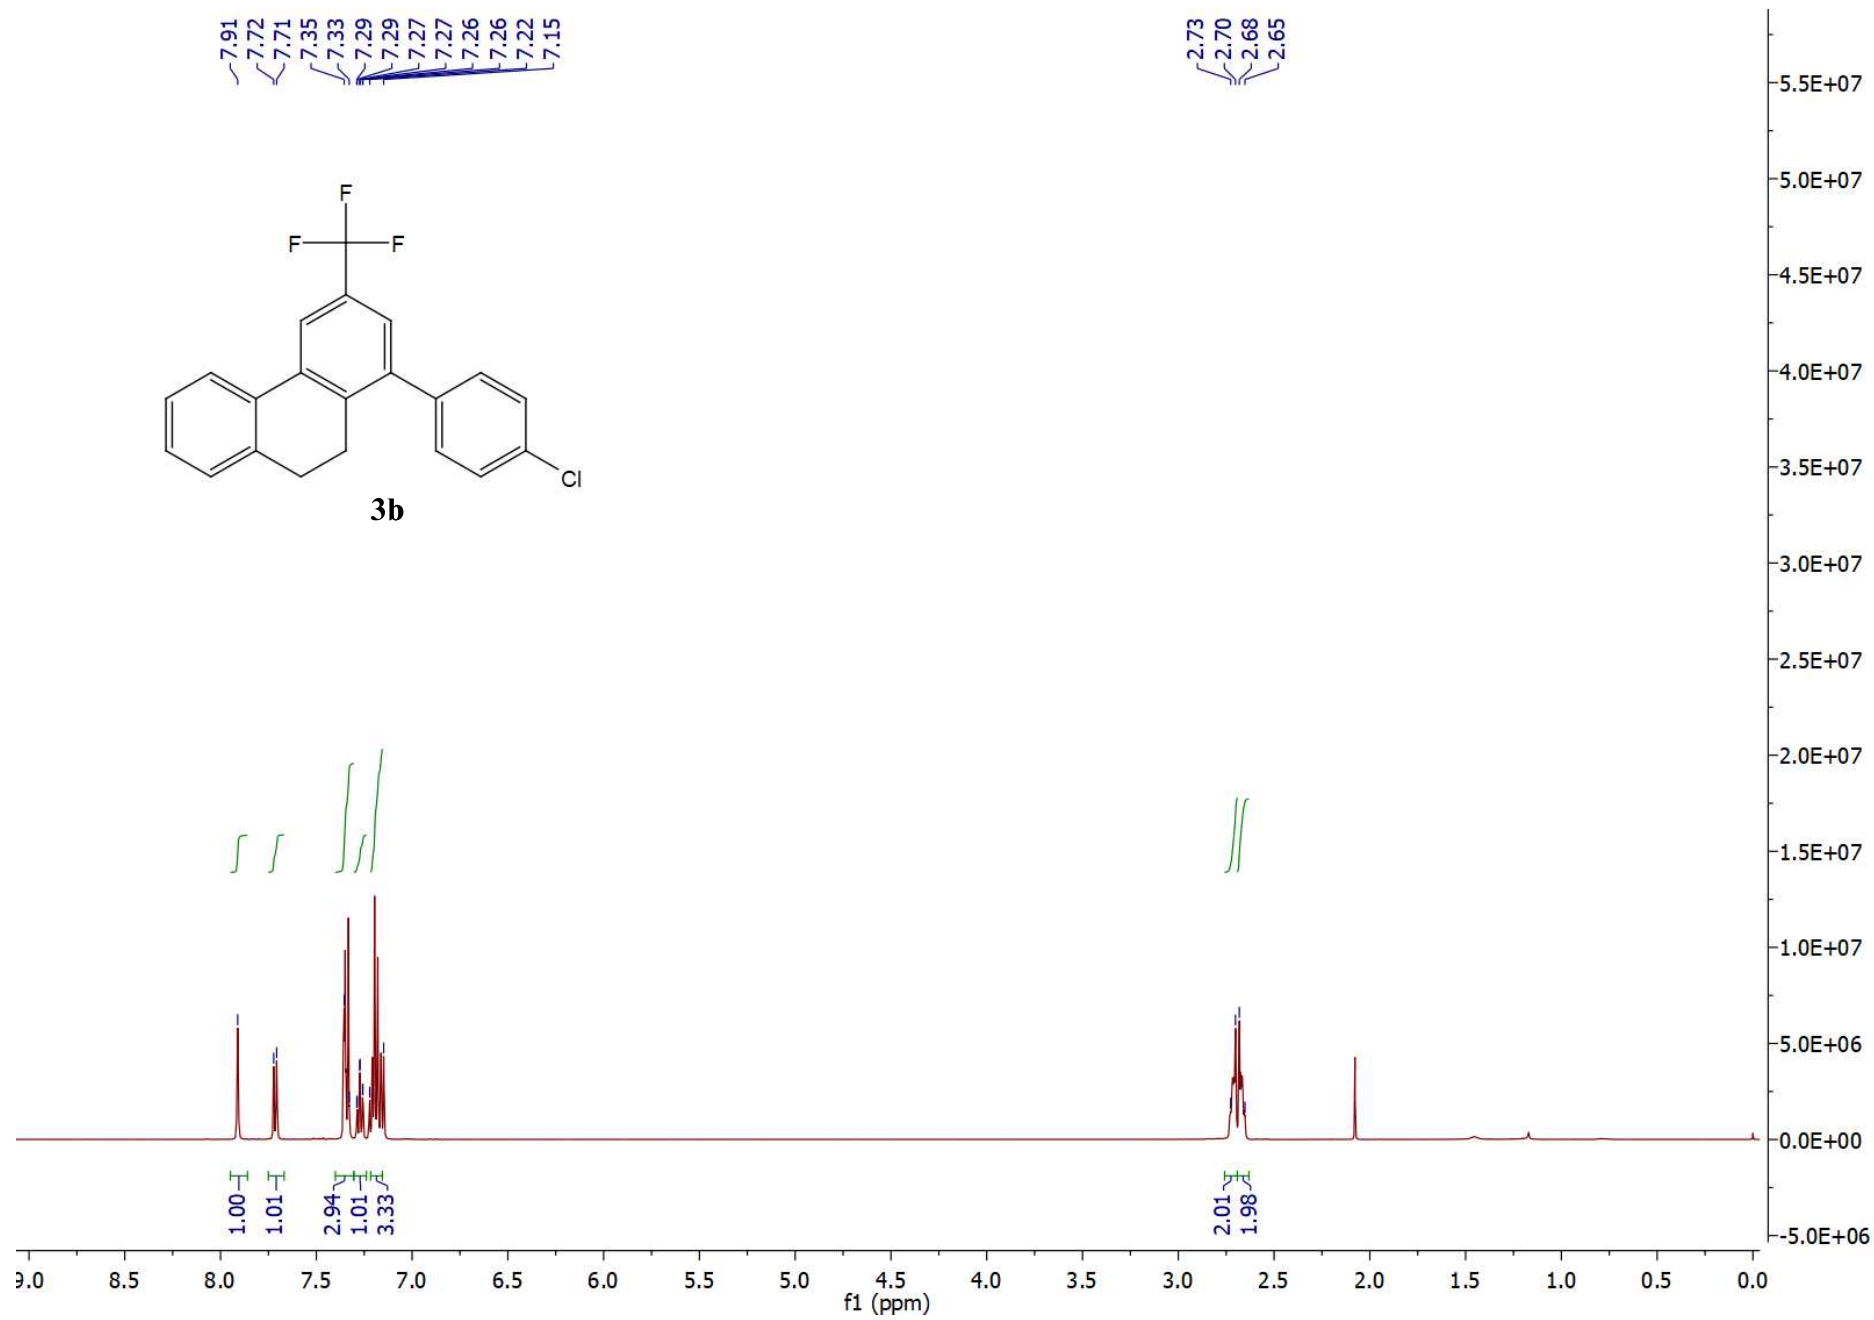

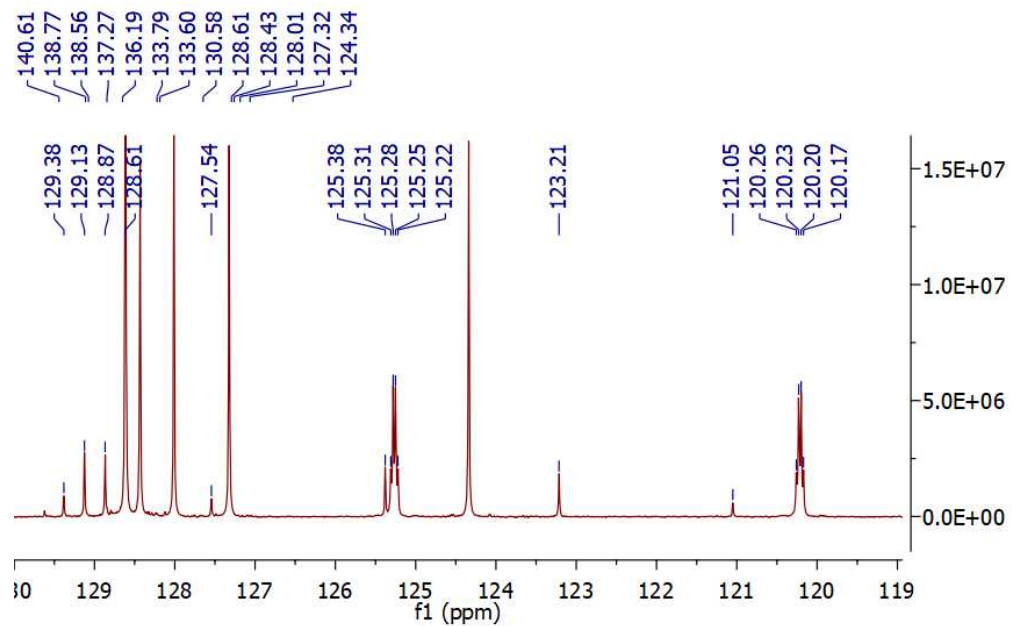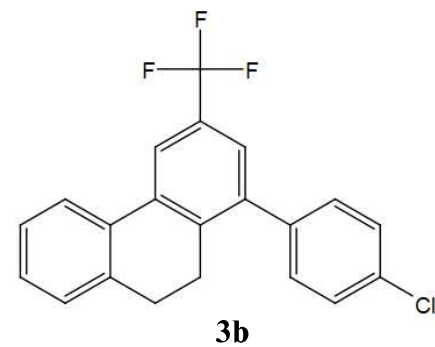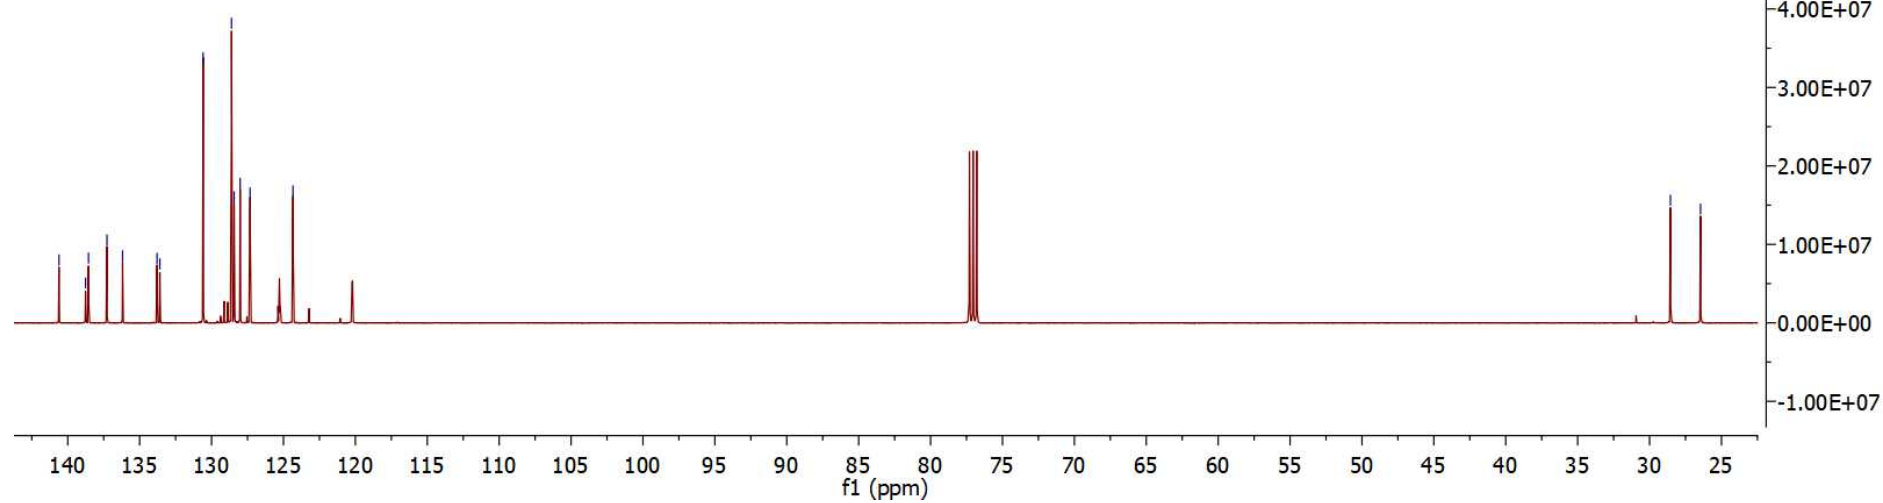

S68

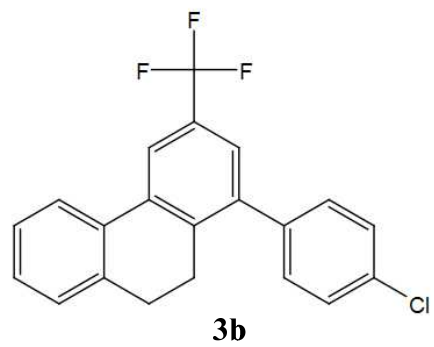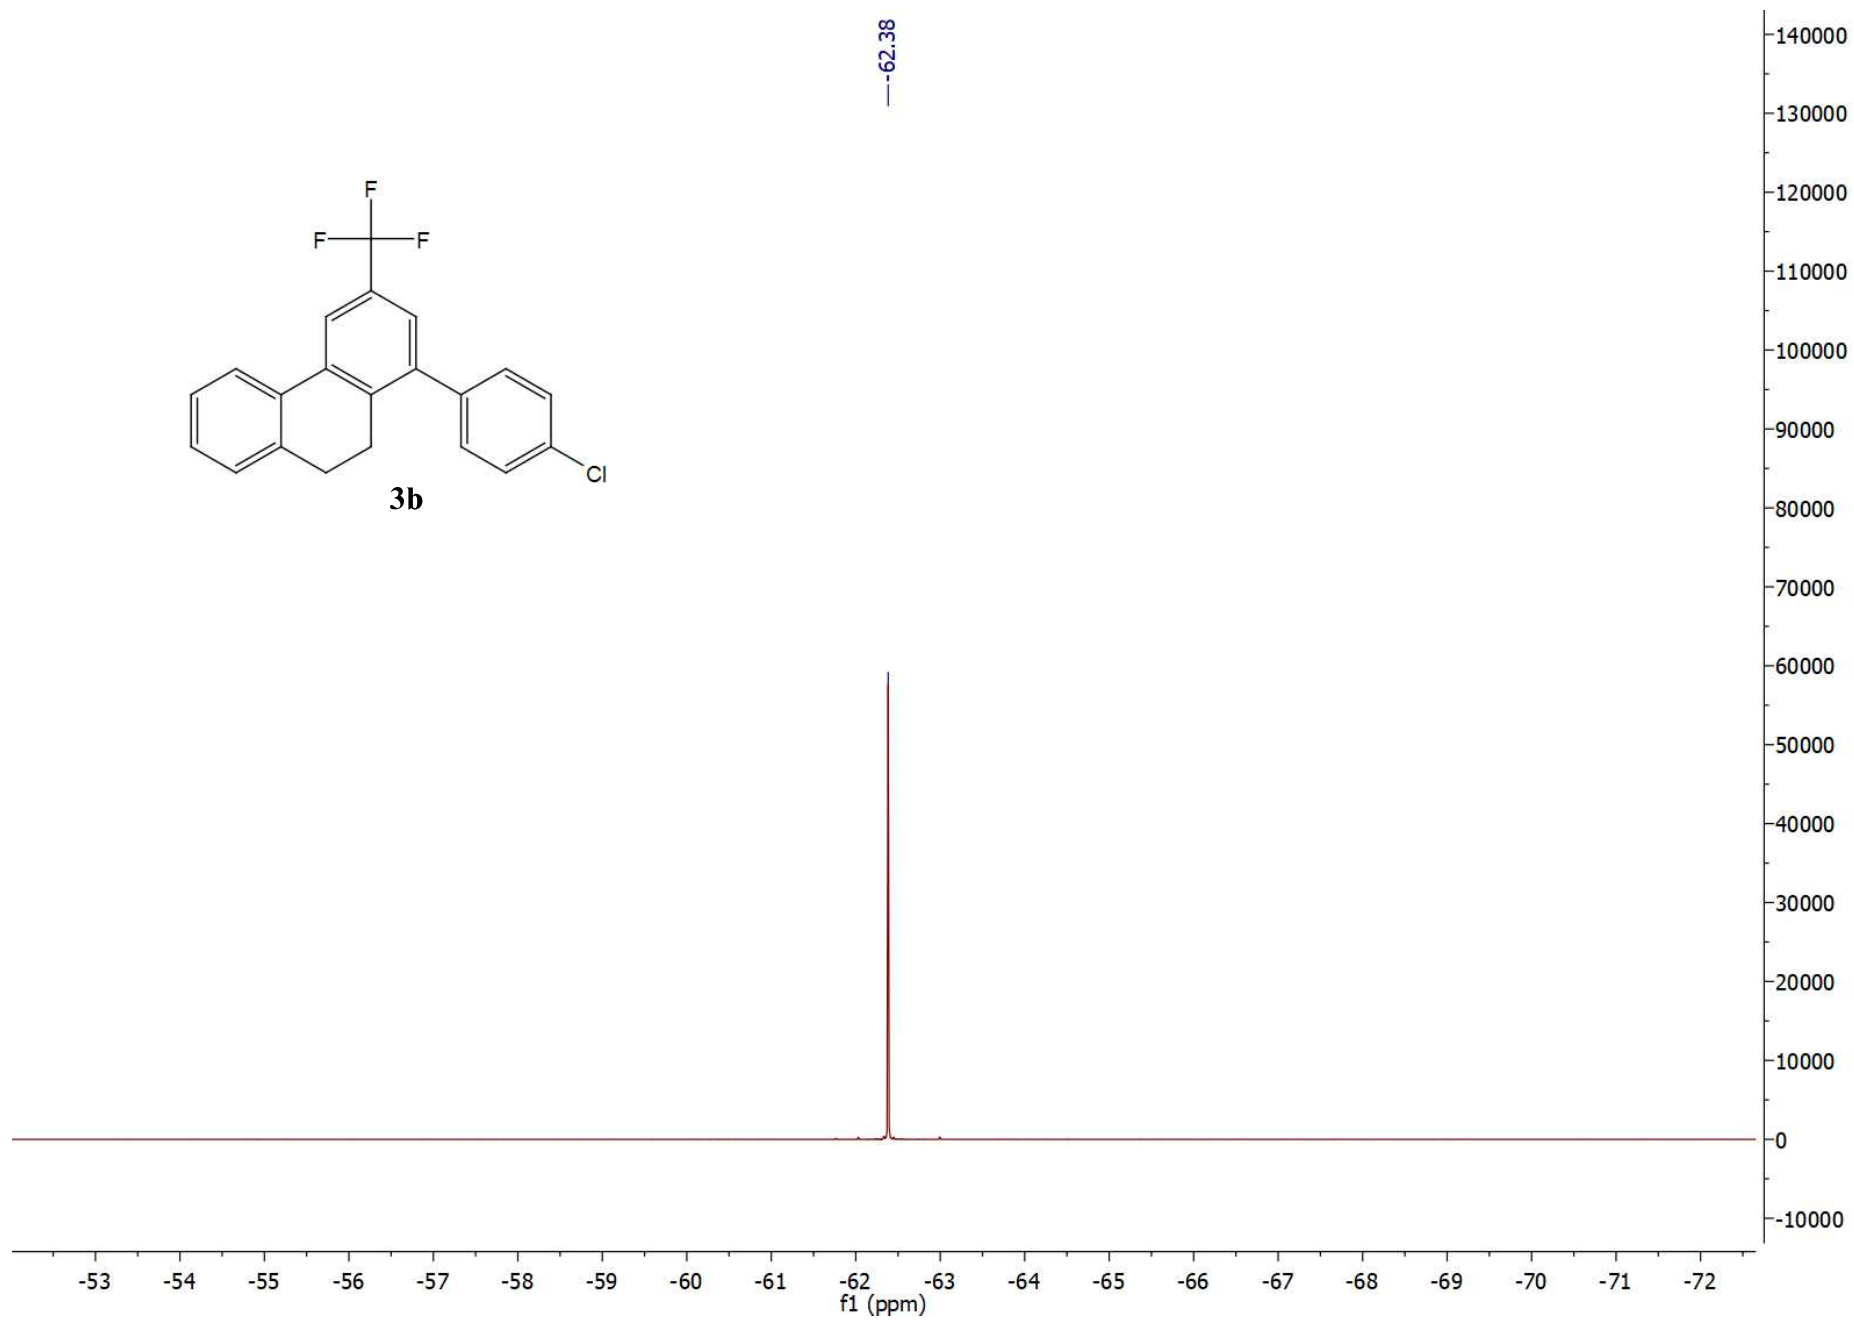



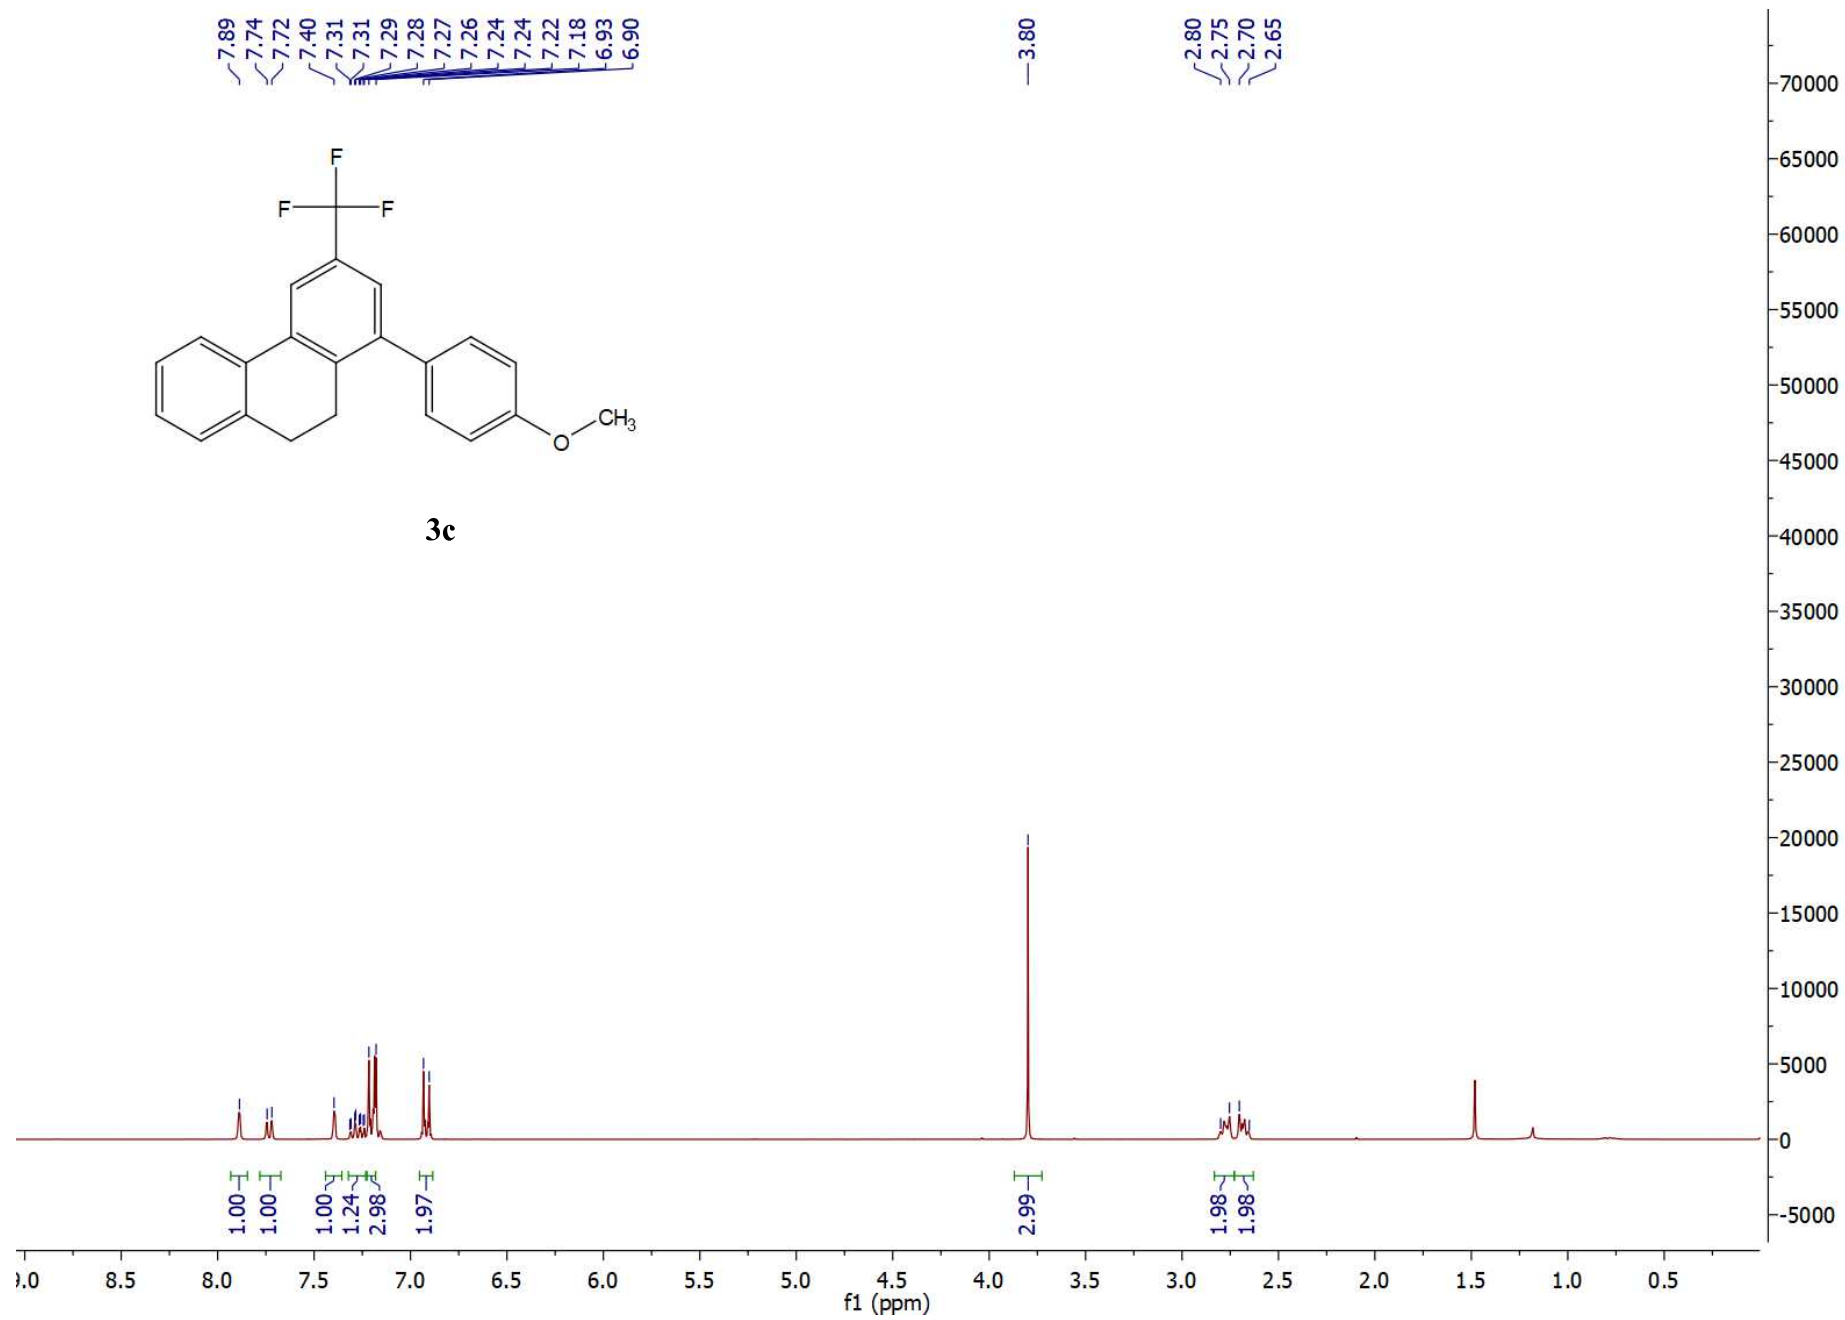

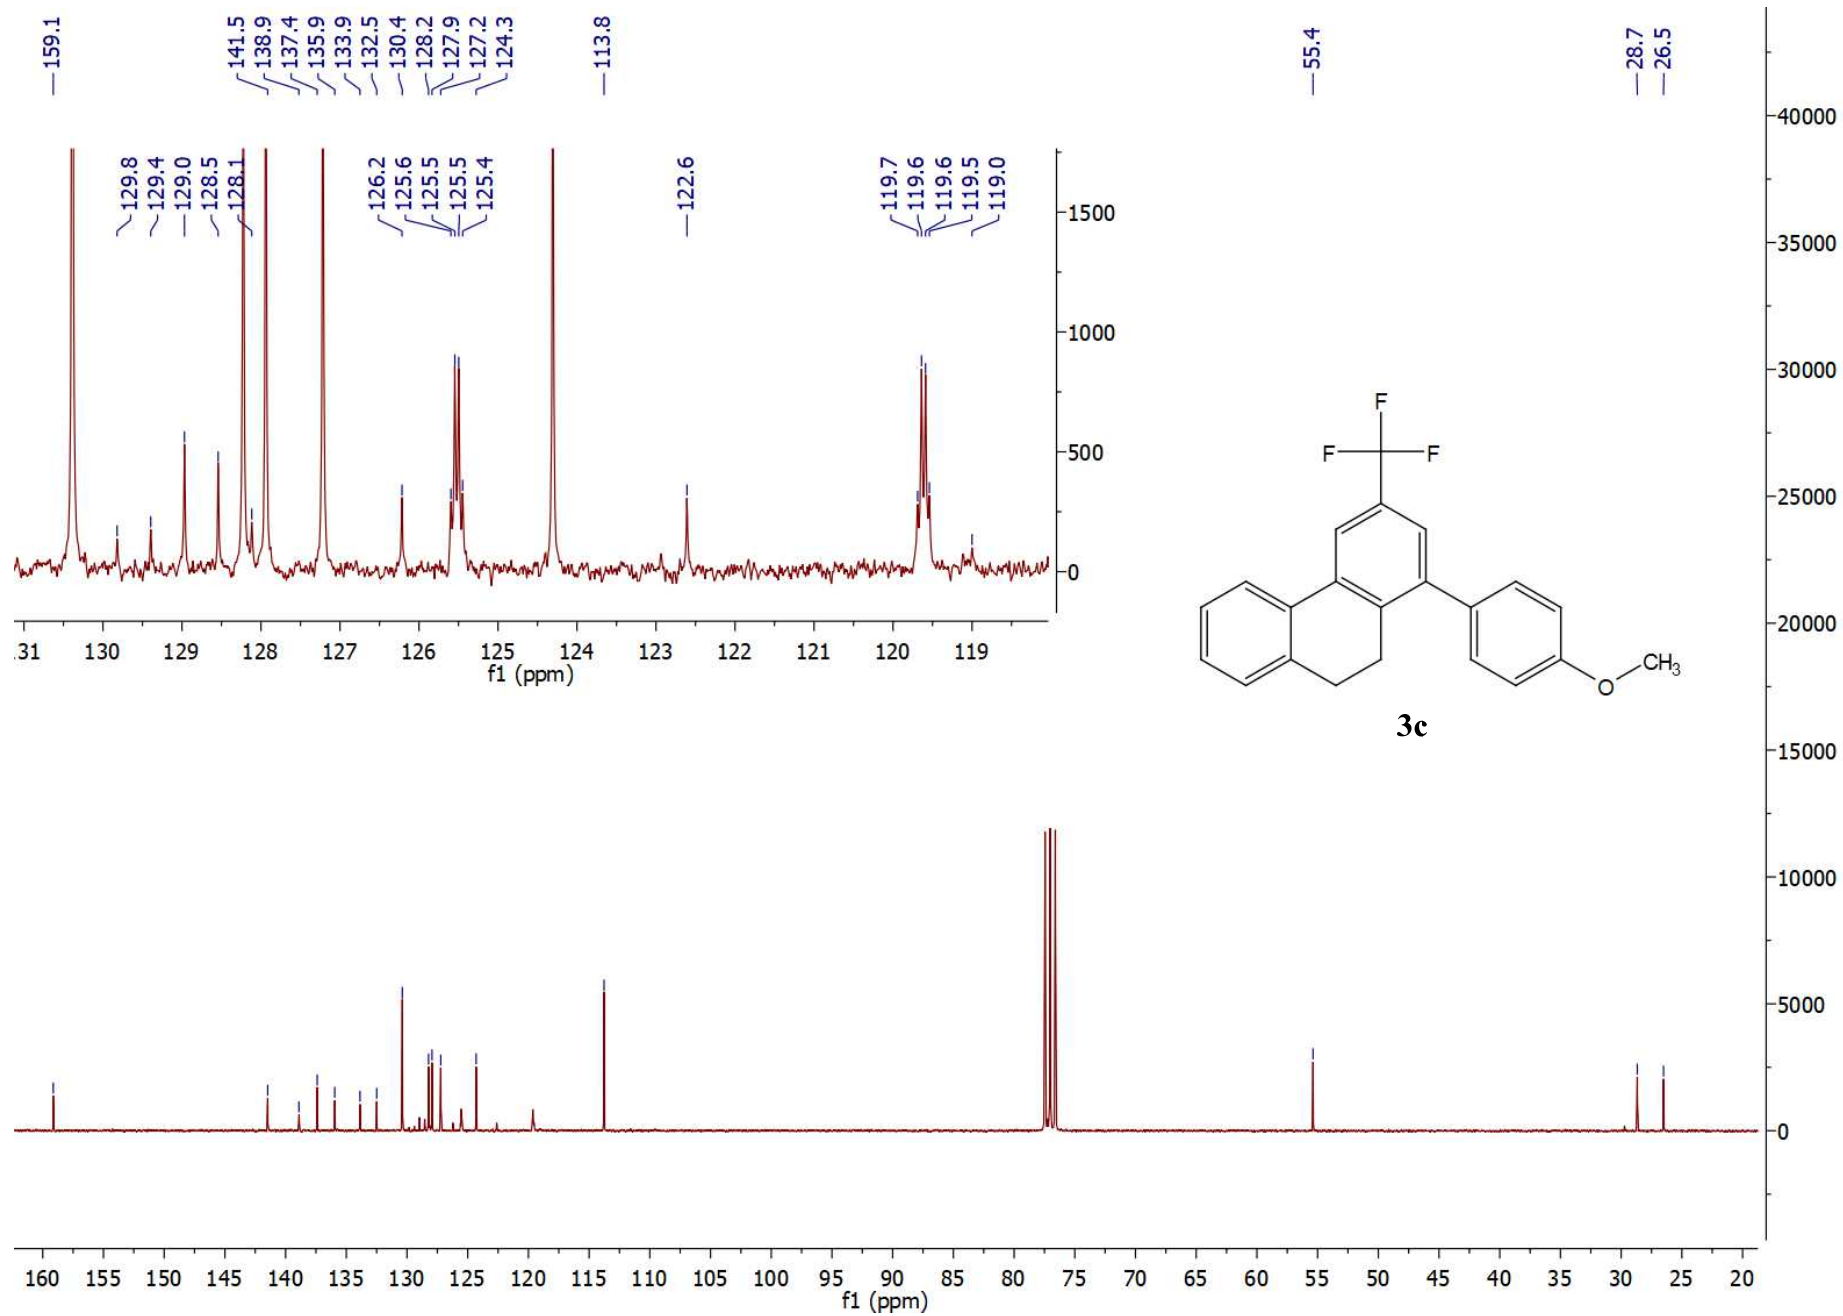

S71

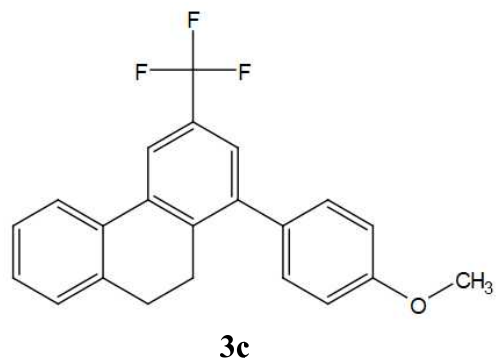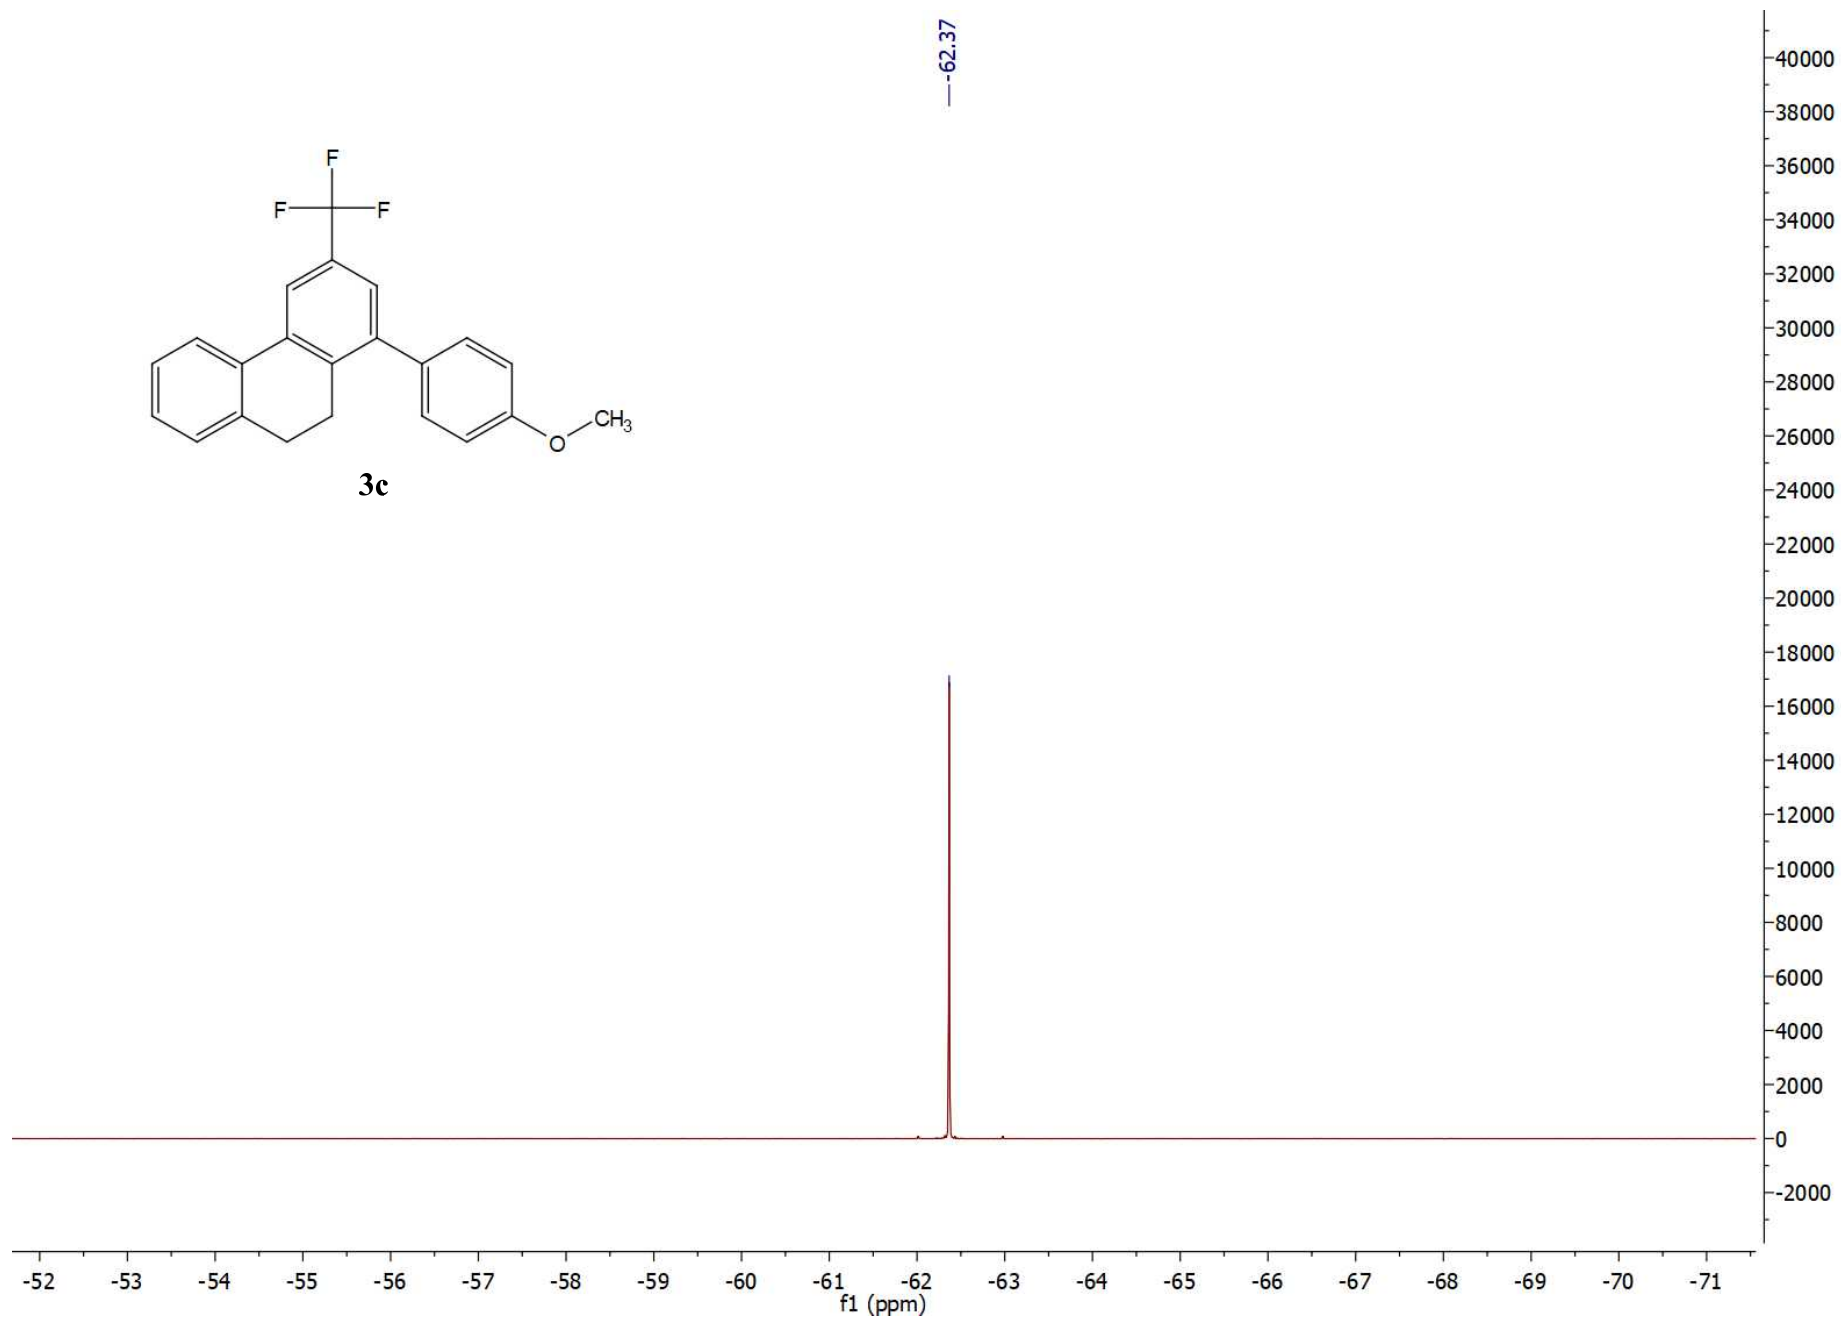

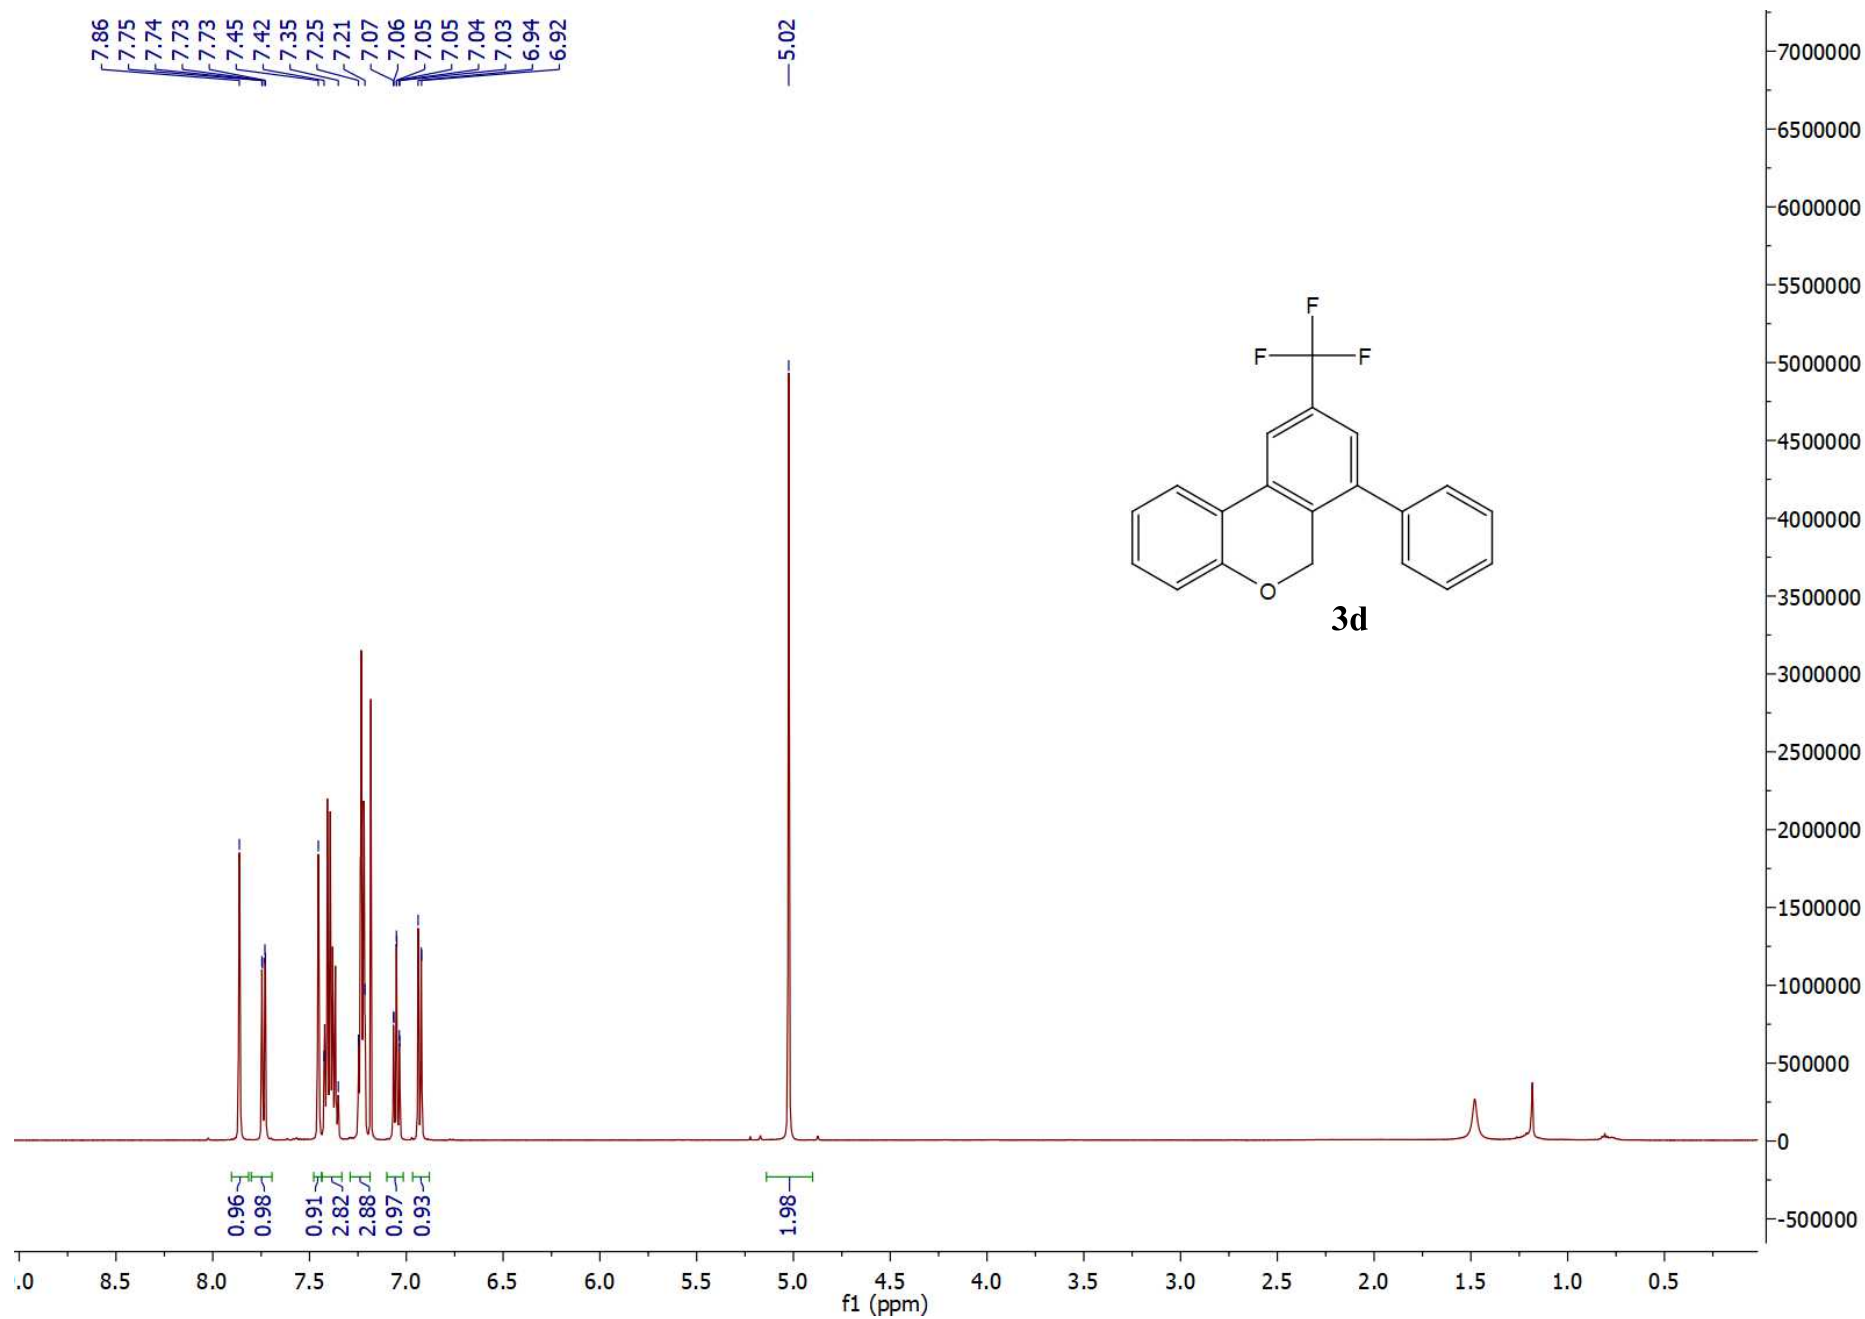

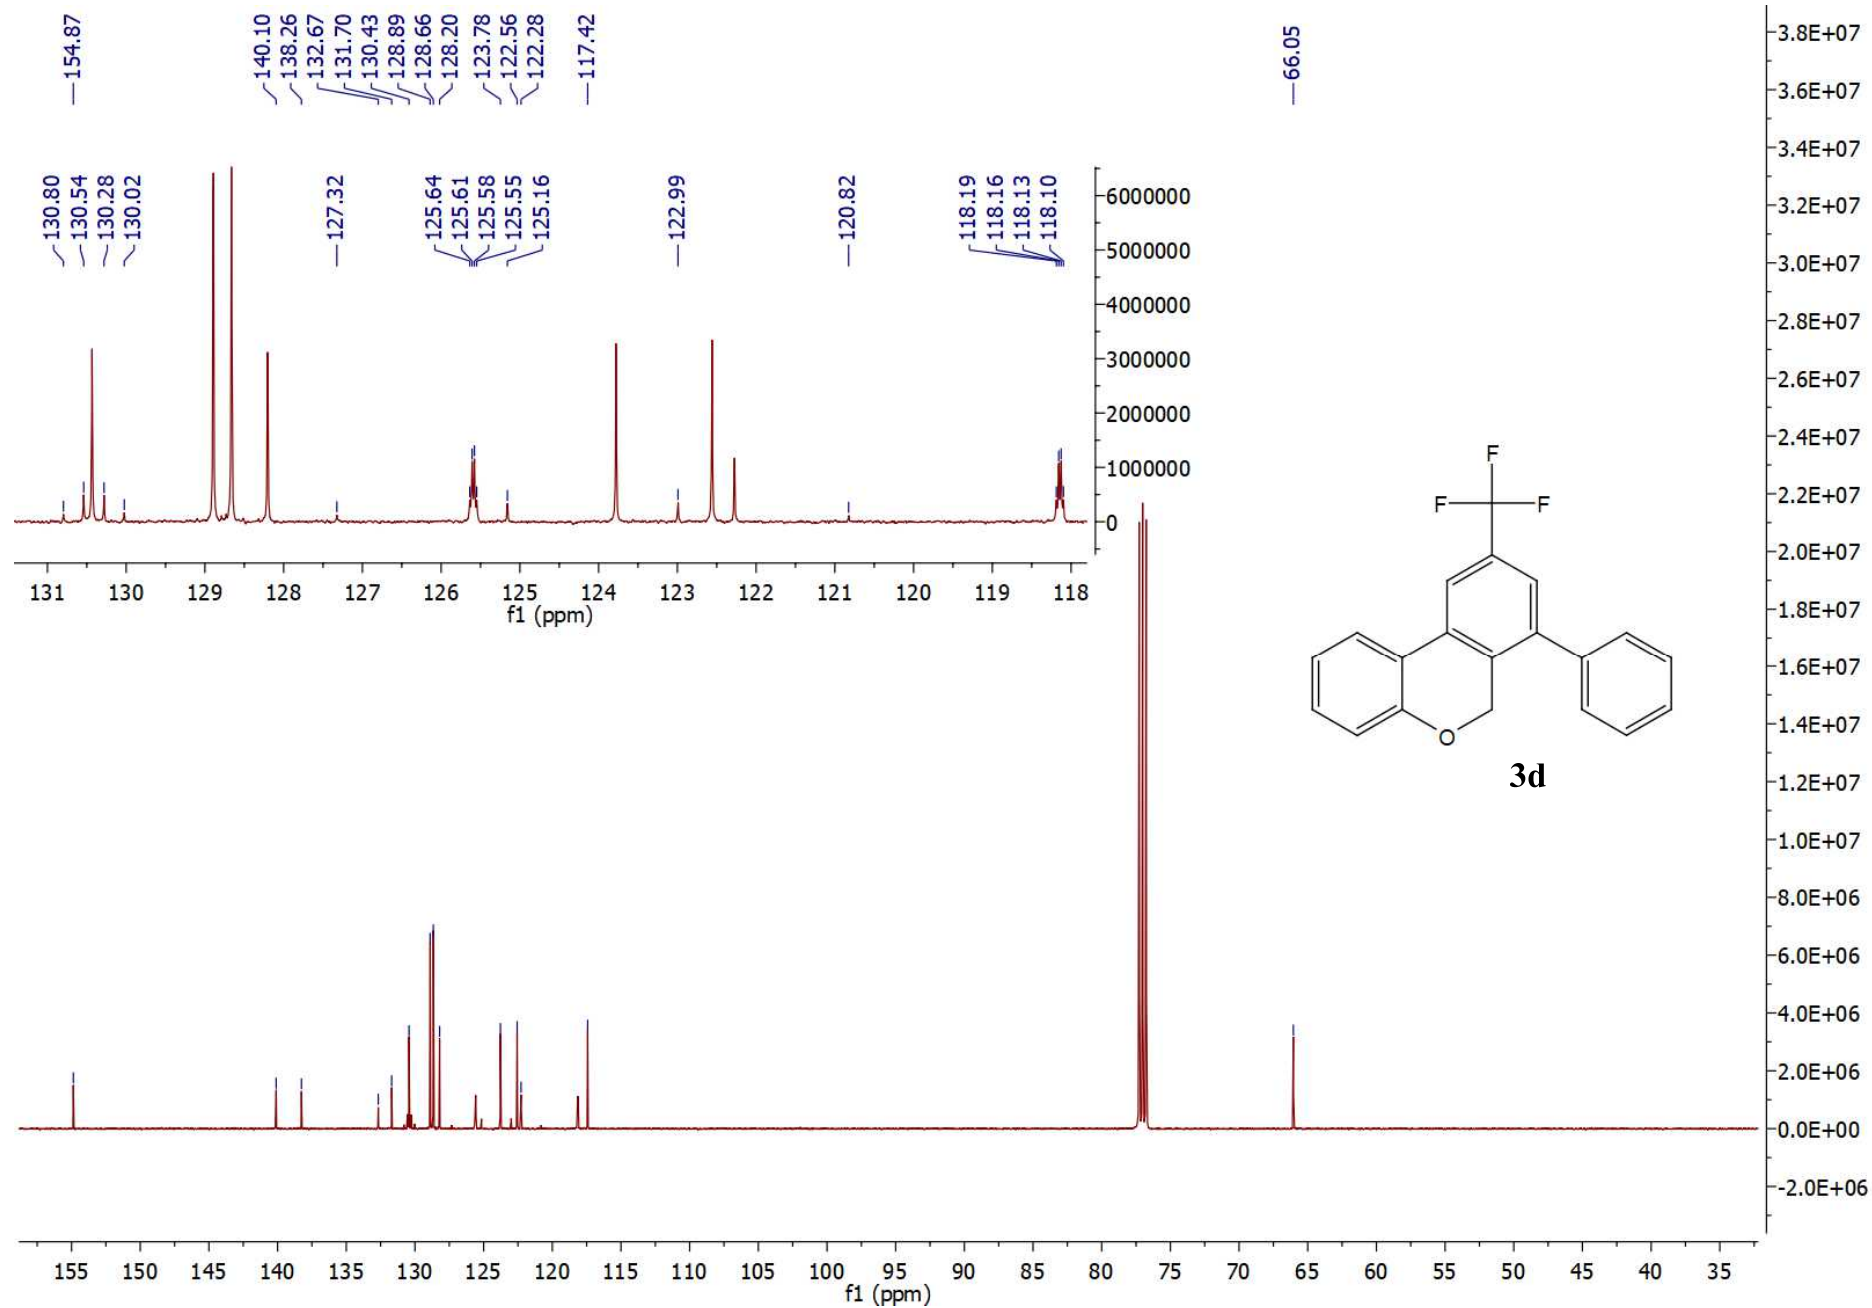

154.87  
140.10  
138.26  
132.67  
131.70  
130.43  
128.89  
128.66  
128.20  
123.78  
122.56  
122.28  
117.42

130.80  
130.54  
130.28  
130.02

127.32

125.64  
125.61  
125.58  
125.55  
125.16

122.99

120.82

118.19  
118.16  
118.13  
118.10

66.05

131 130 129 128 127 126 125 124 123 122 121 120 119 118  
f1 (ppm)

155 150 145 140 135 130 125 120 115 110 105 100 95 90 85 80 75 70 65 60 55 50 45 40 35  
f1 (ppm)

3.8E+07  
3.6E+07  
3.4E+07  
3.2E+07  
3.0E+07  
2.8E+07  
2.6E+07  
2.4E+07  
2.2E+07  
2.0E+07  
1.8E+07  
1.6E+07  
1.4E+07  
1.2E+07  
1.0E+07  
8.0E+06  
6.0E+06  
4.0E+06  
2.0E+06  
0.0E+00  
-2.0E+06



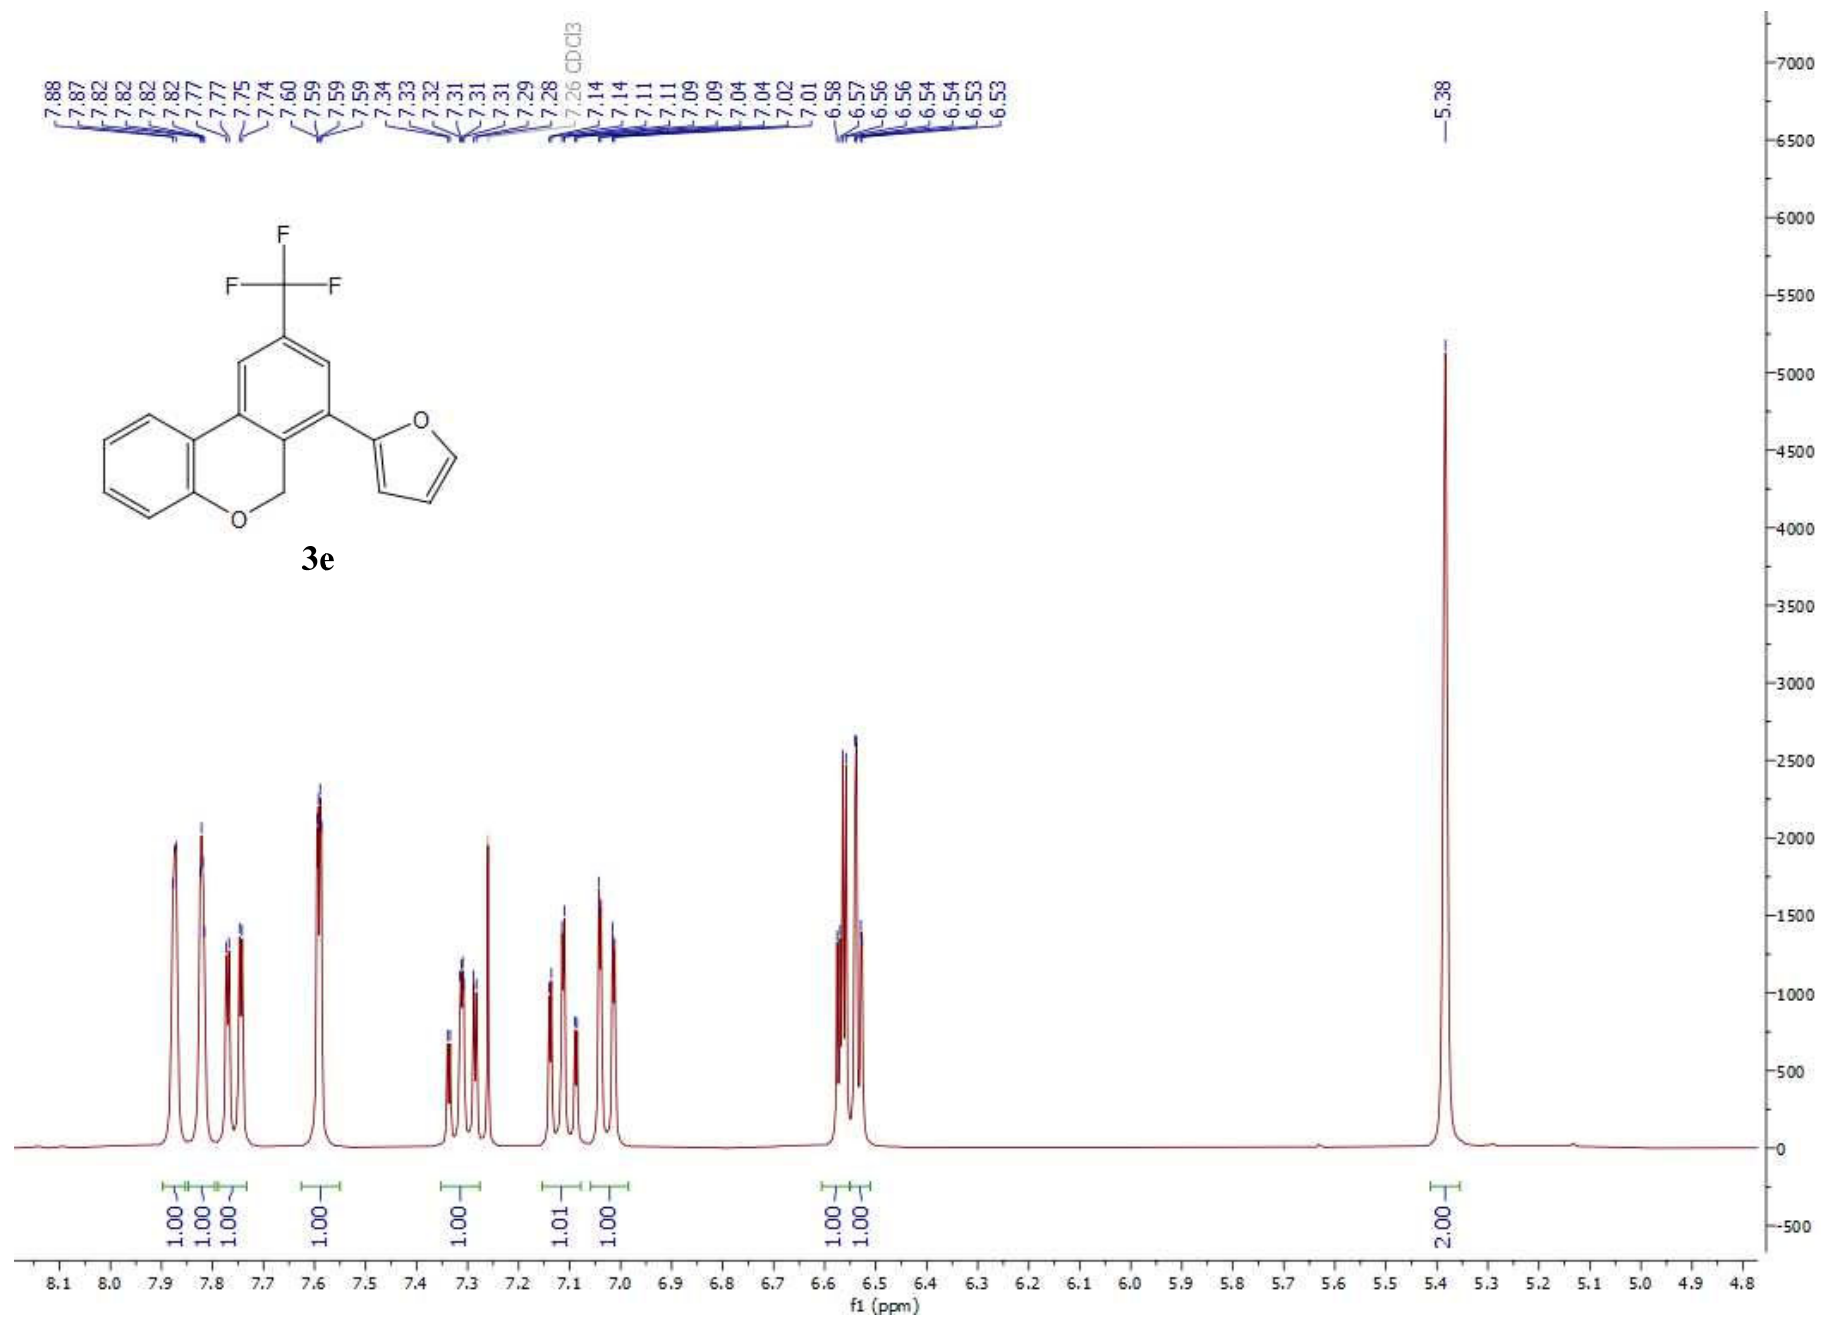

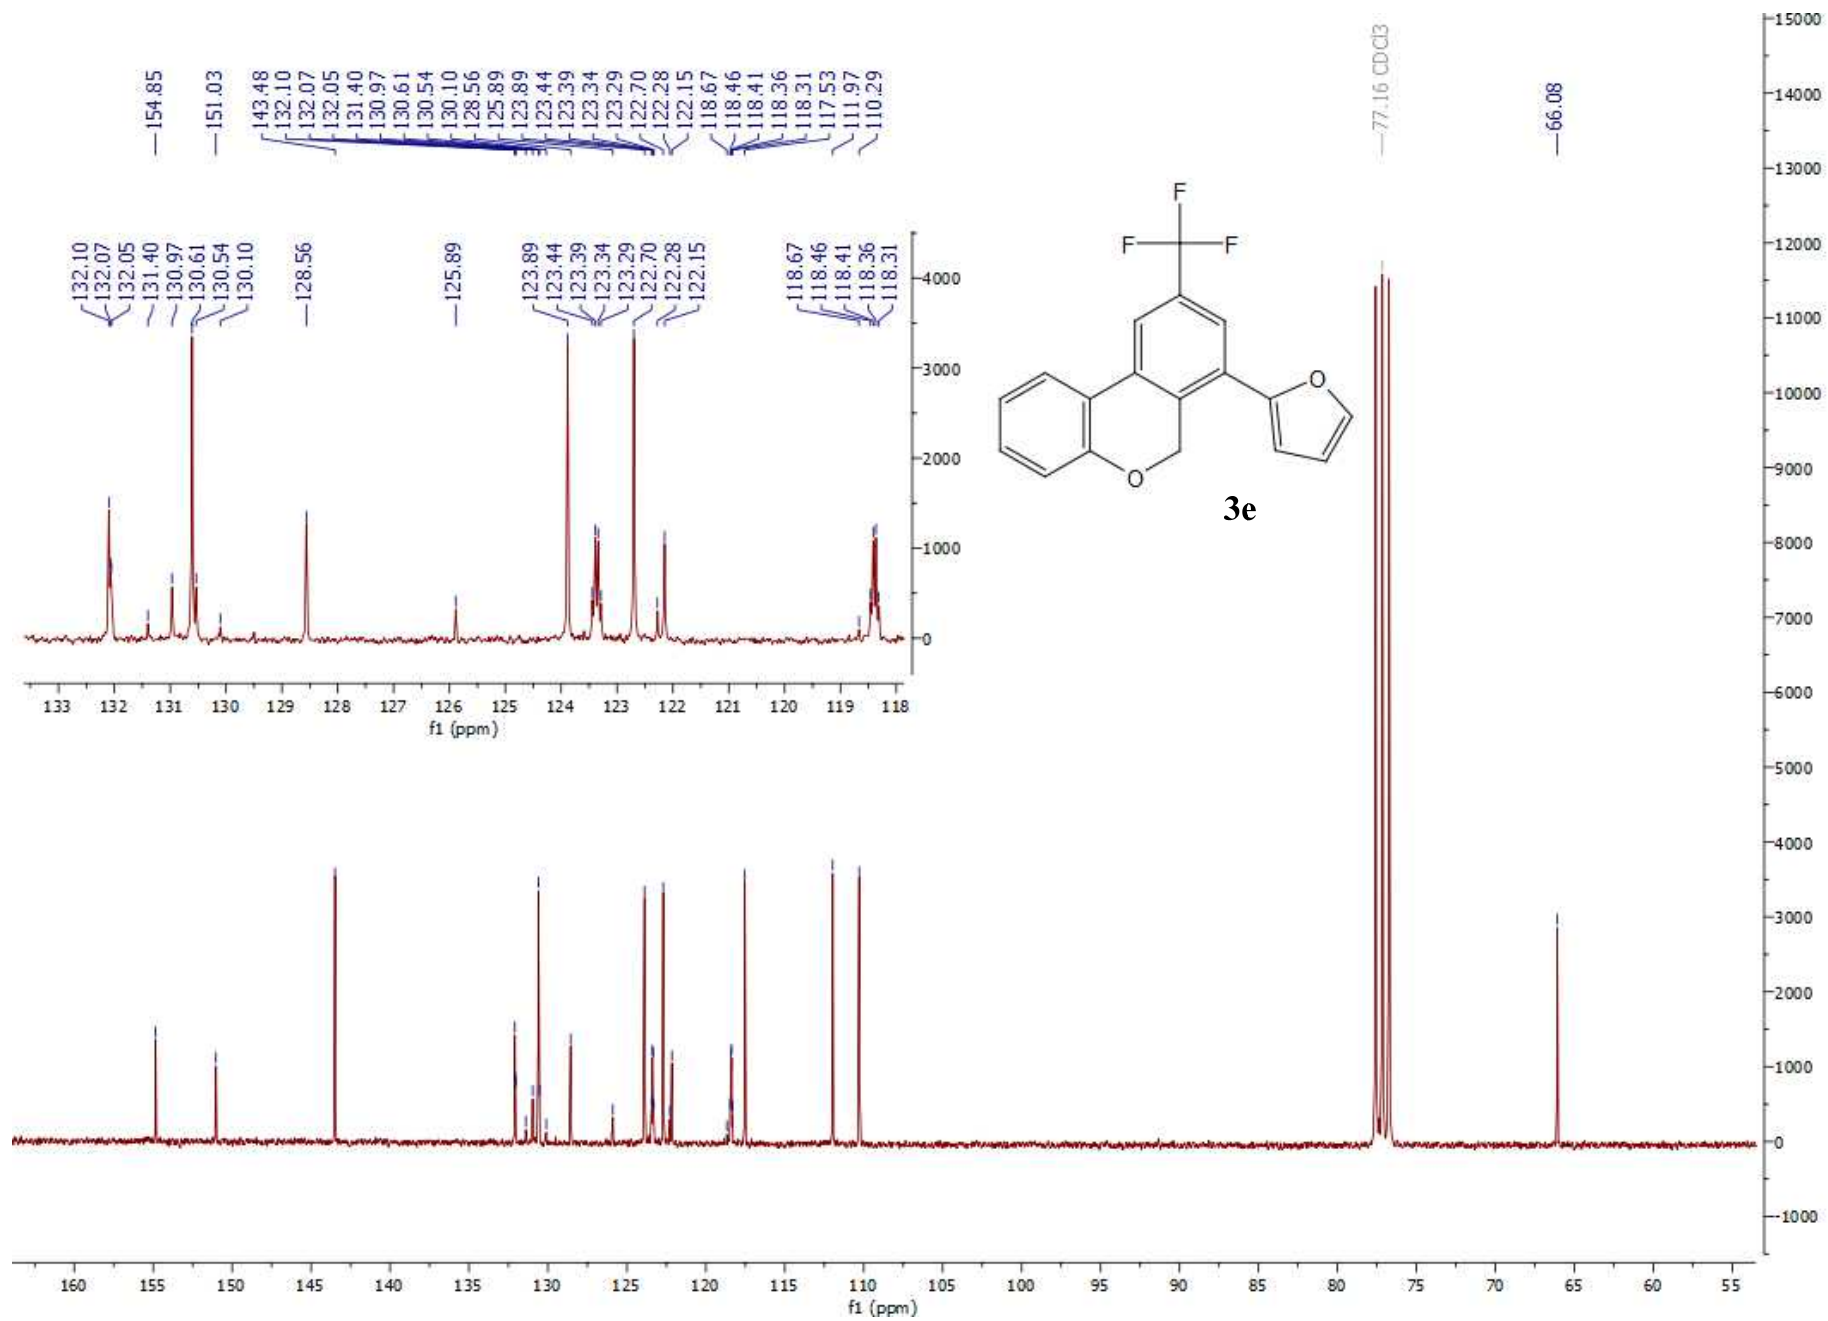



S77

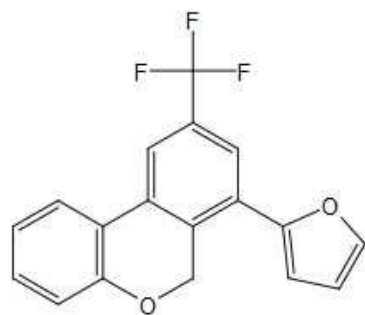

**3e**

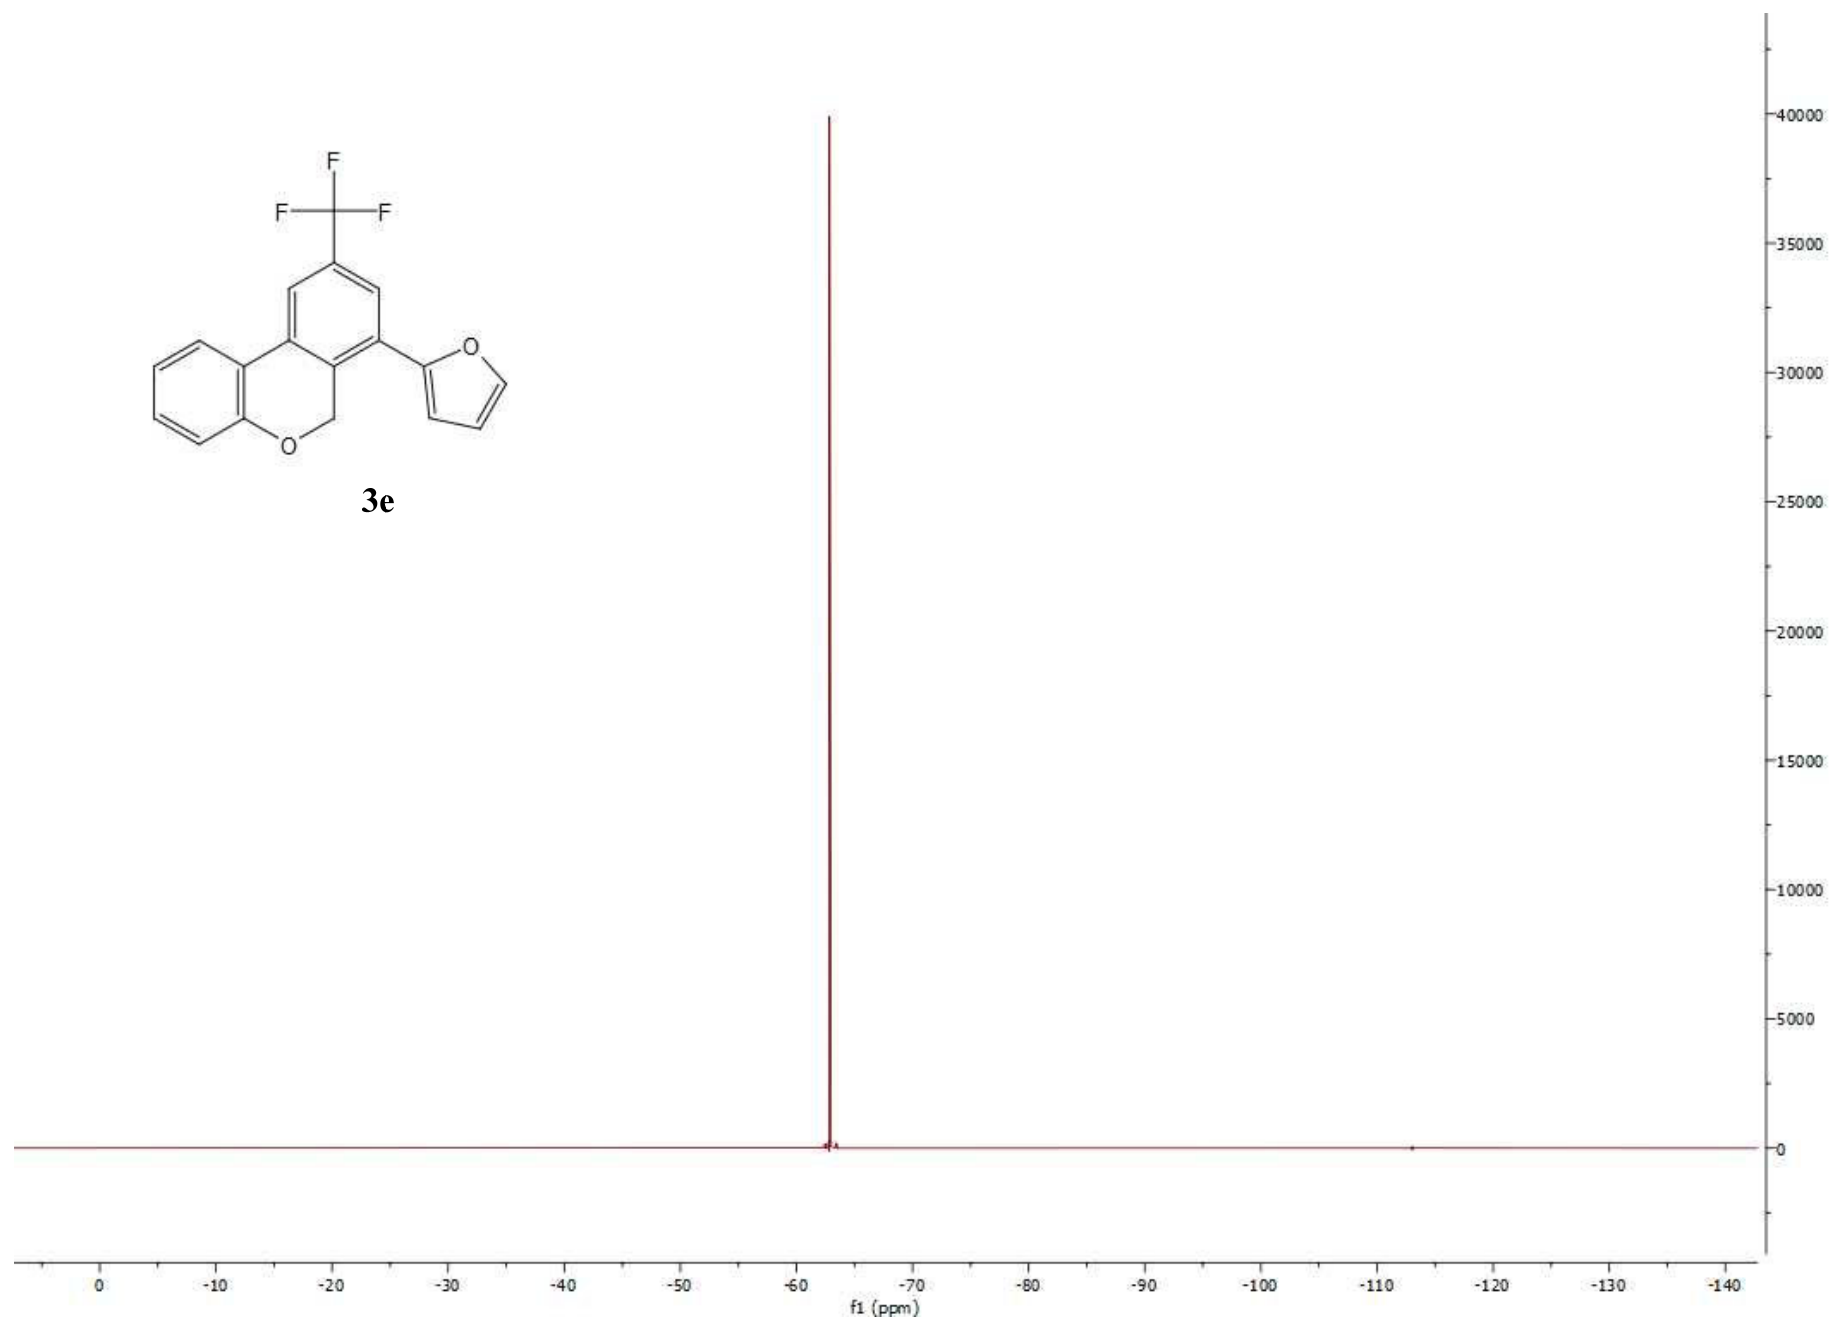

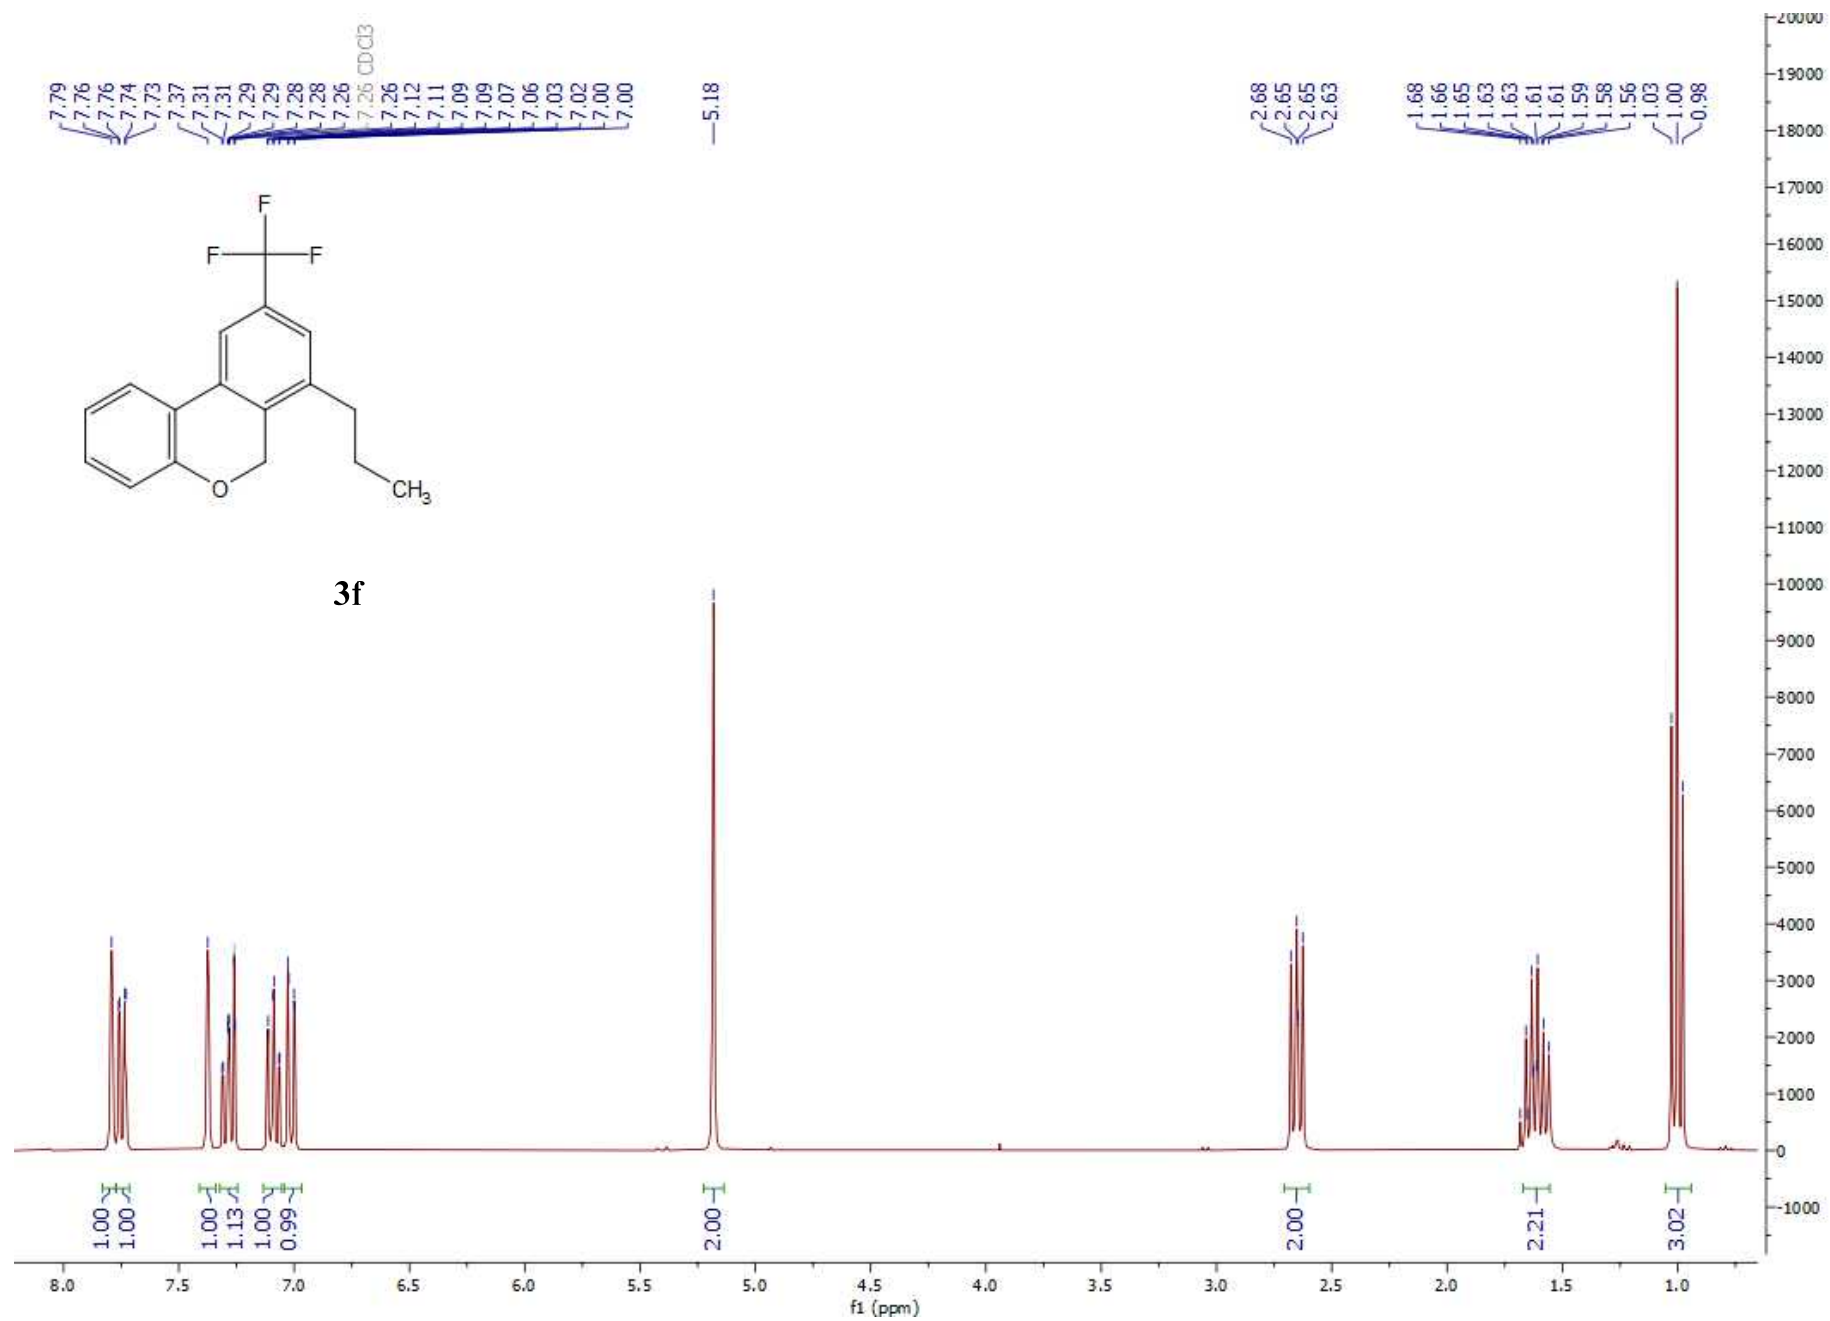

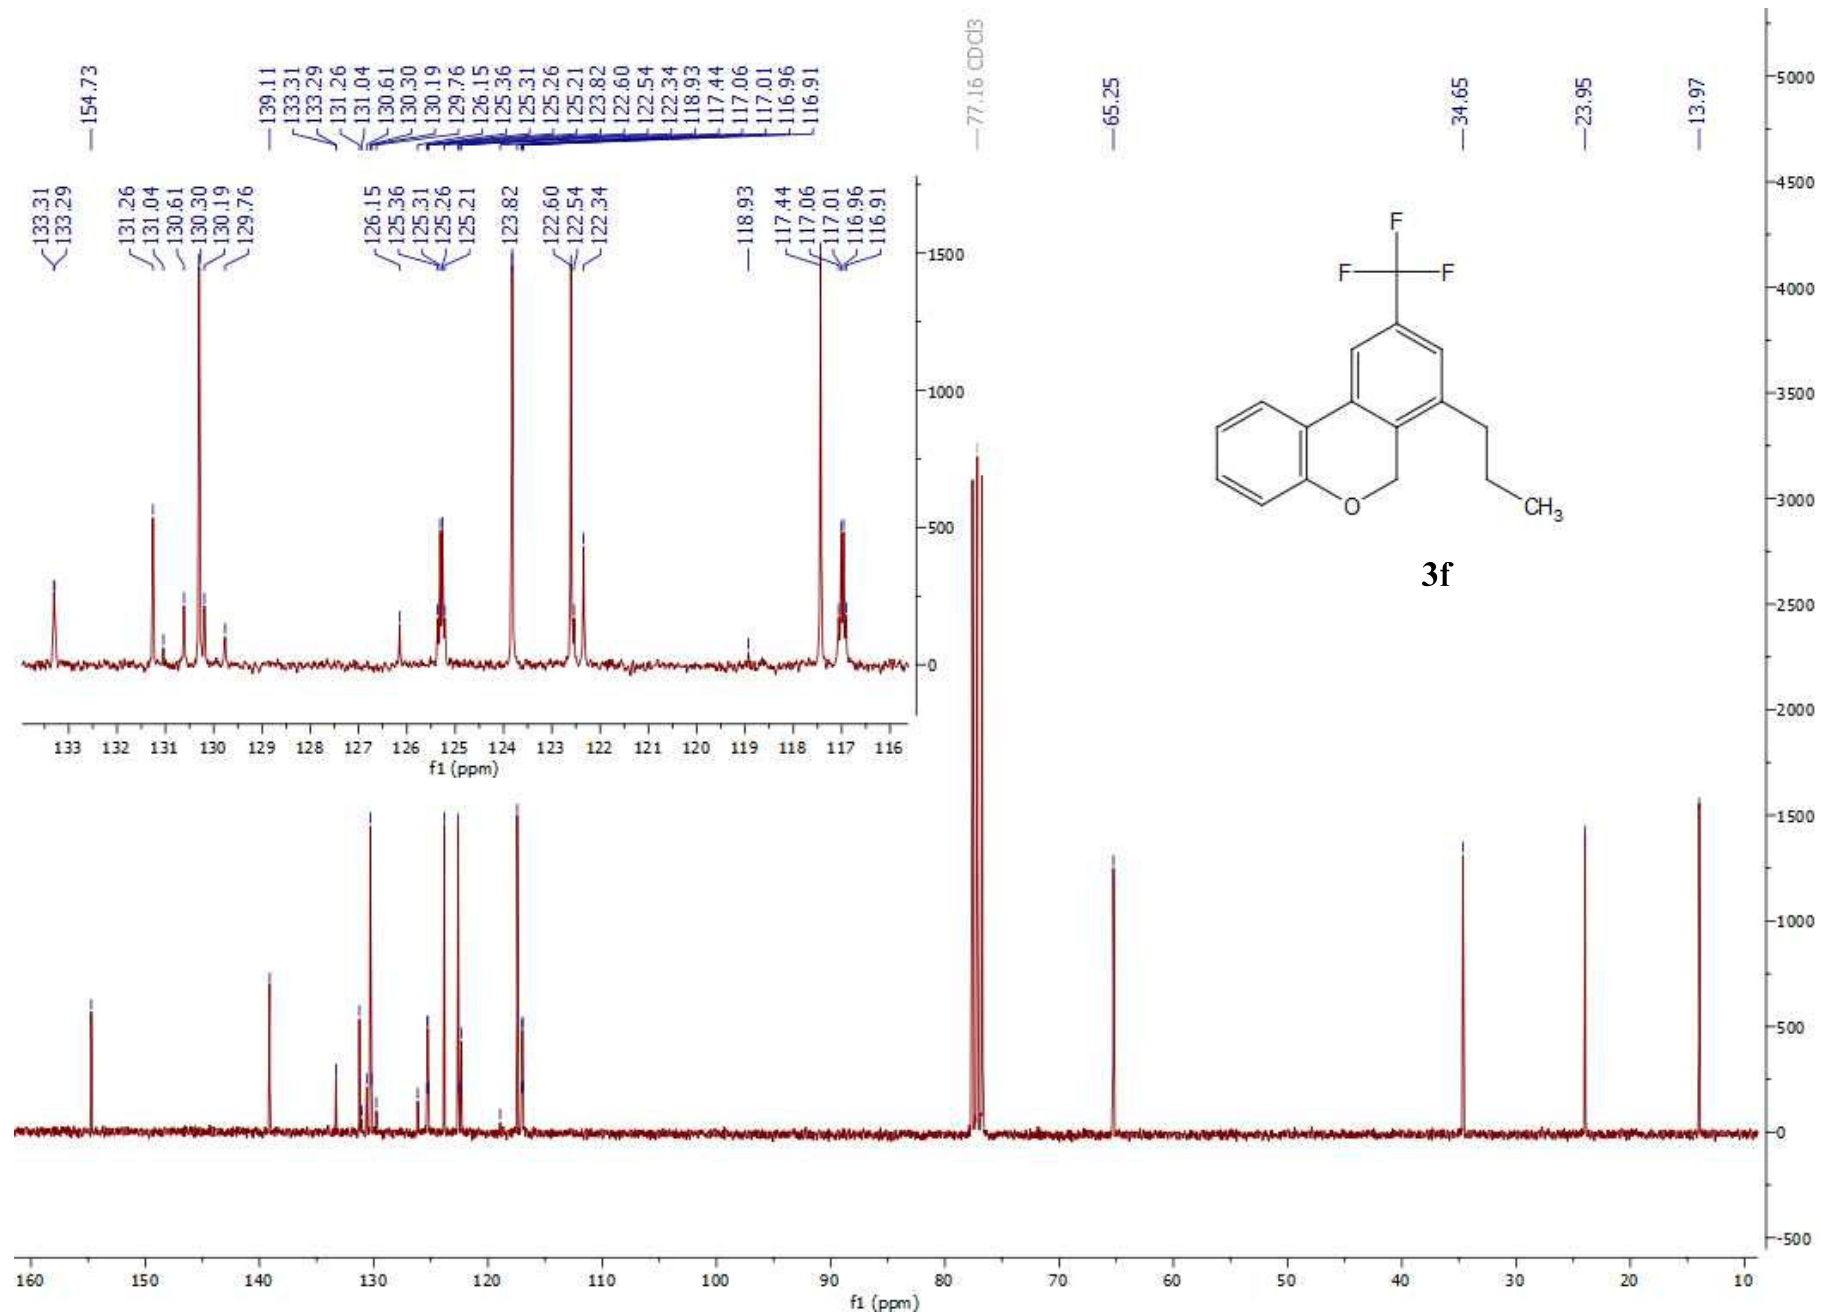

S80

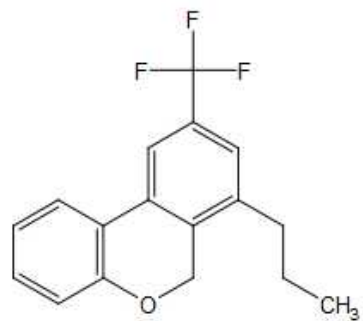

3f

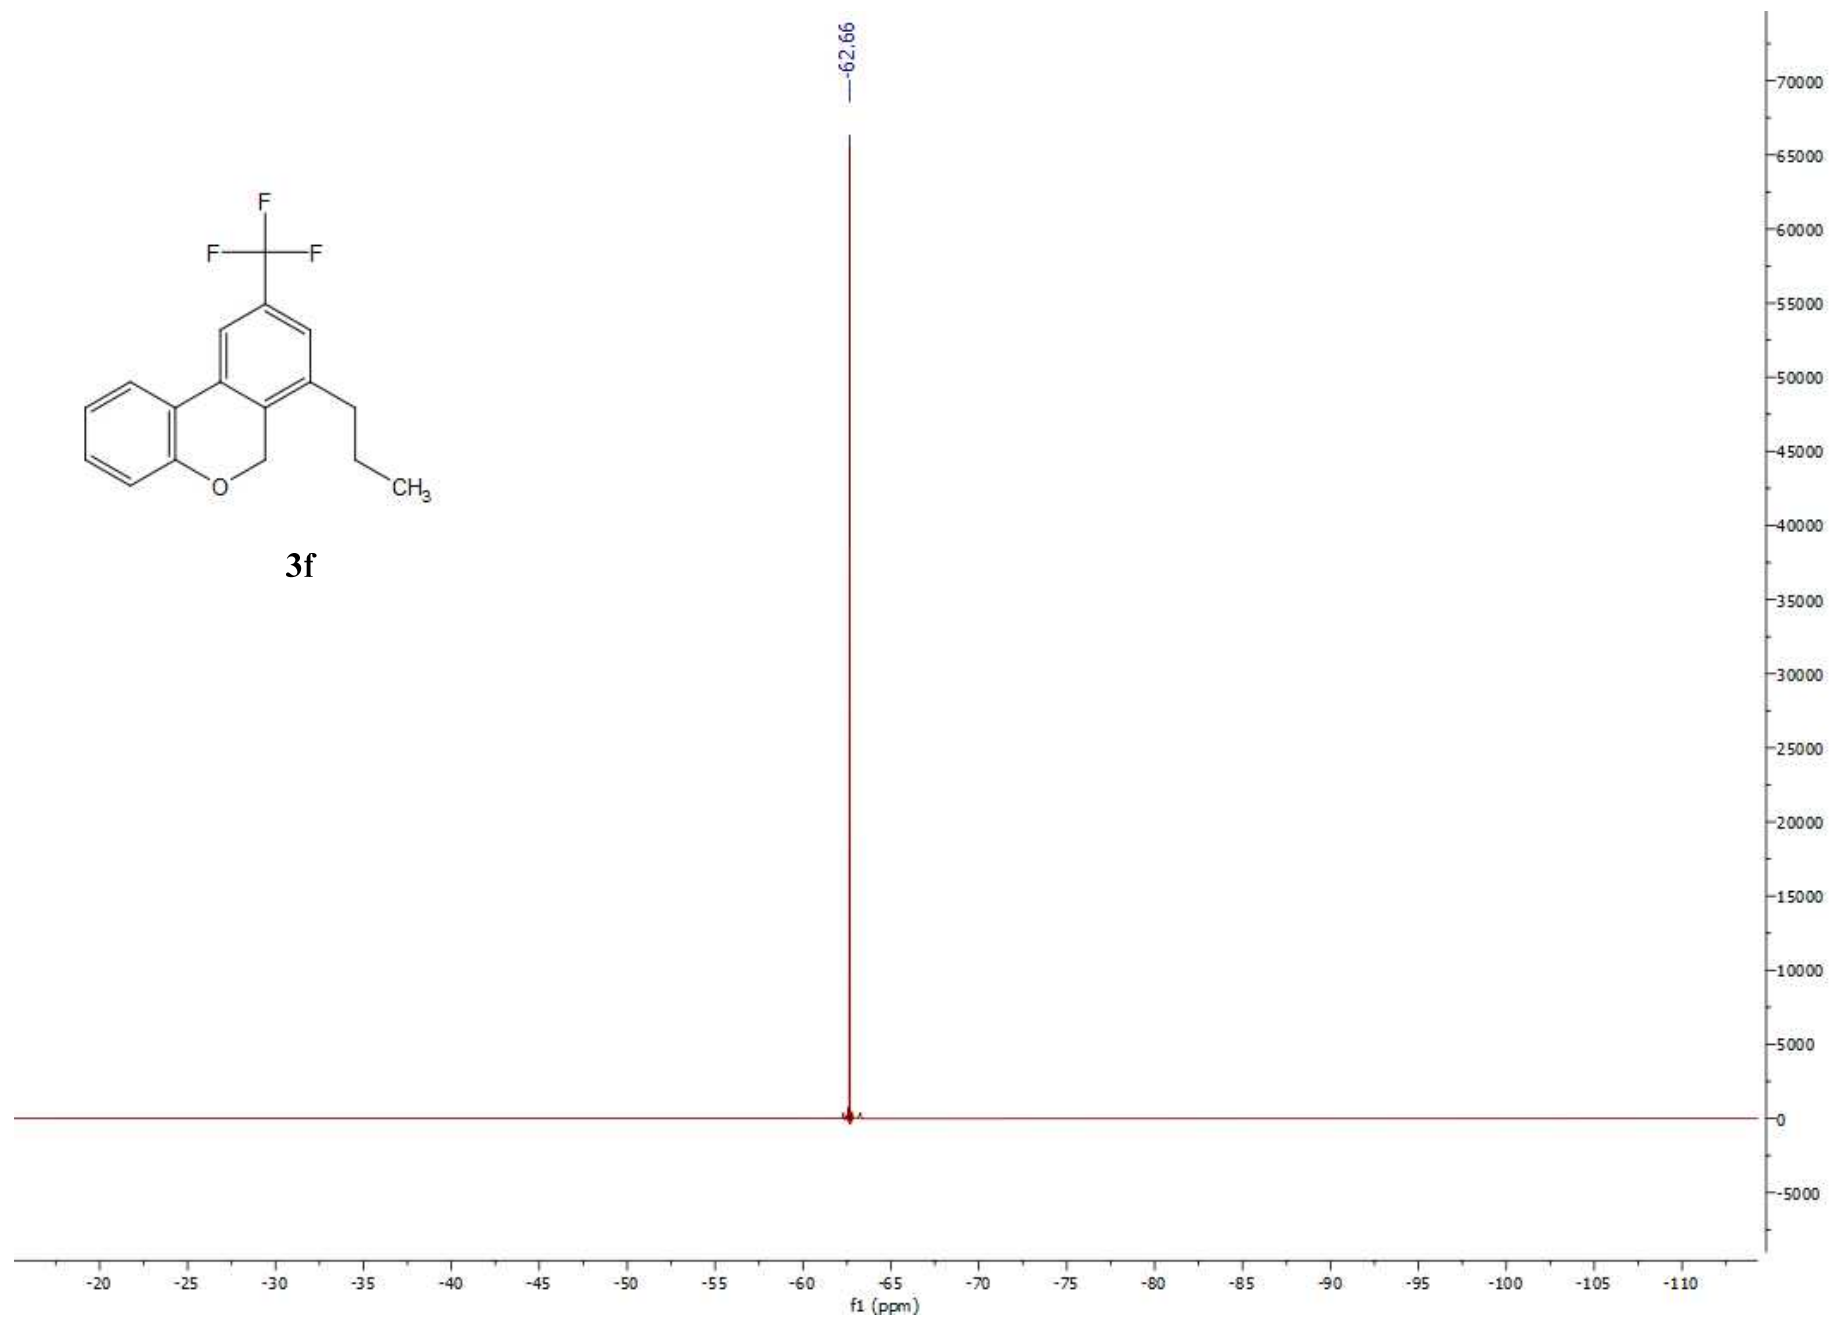

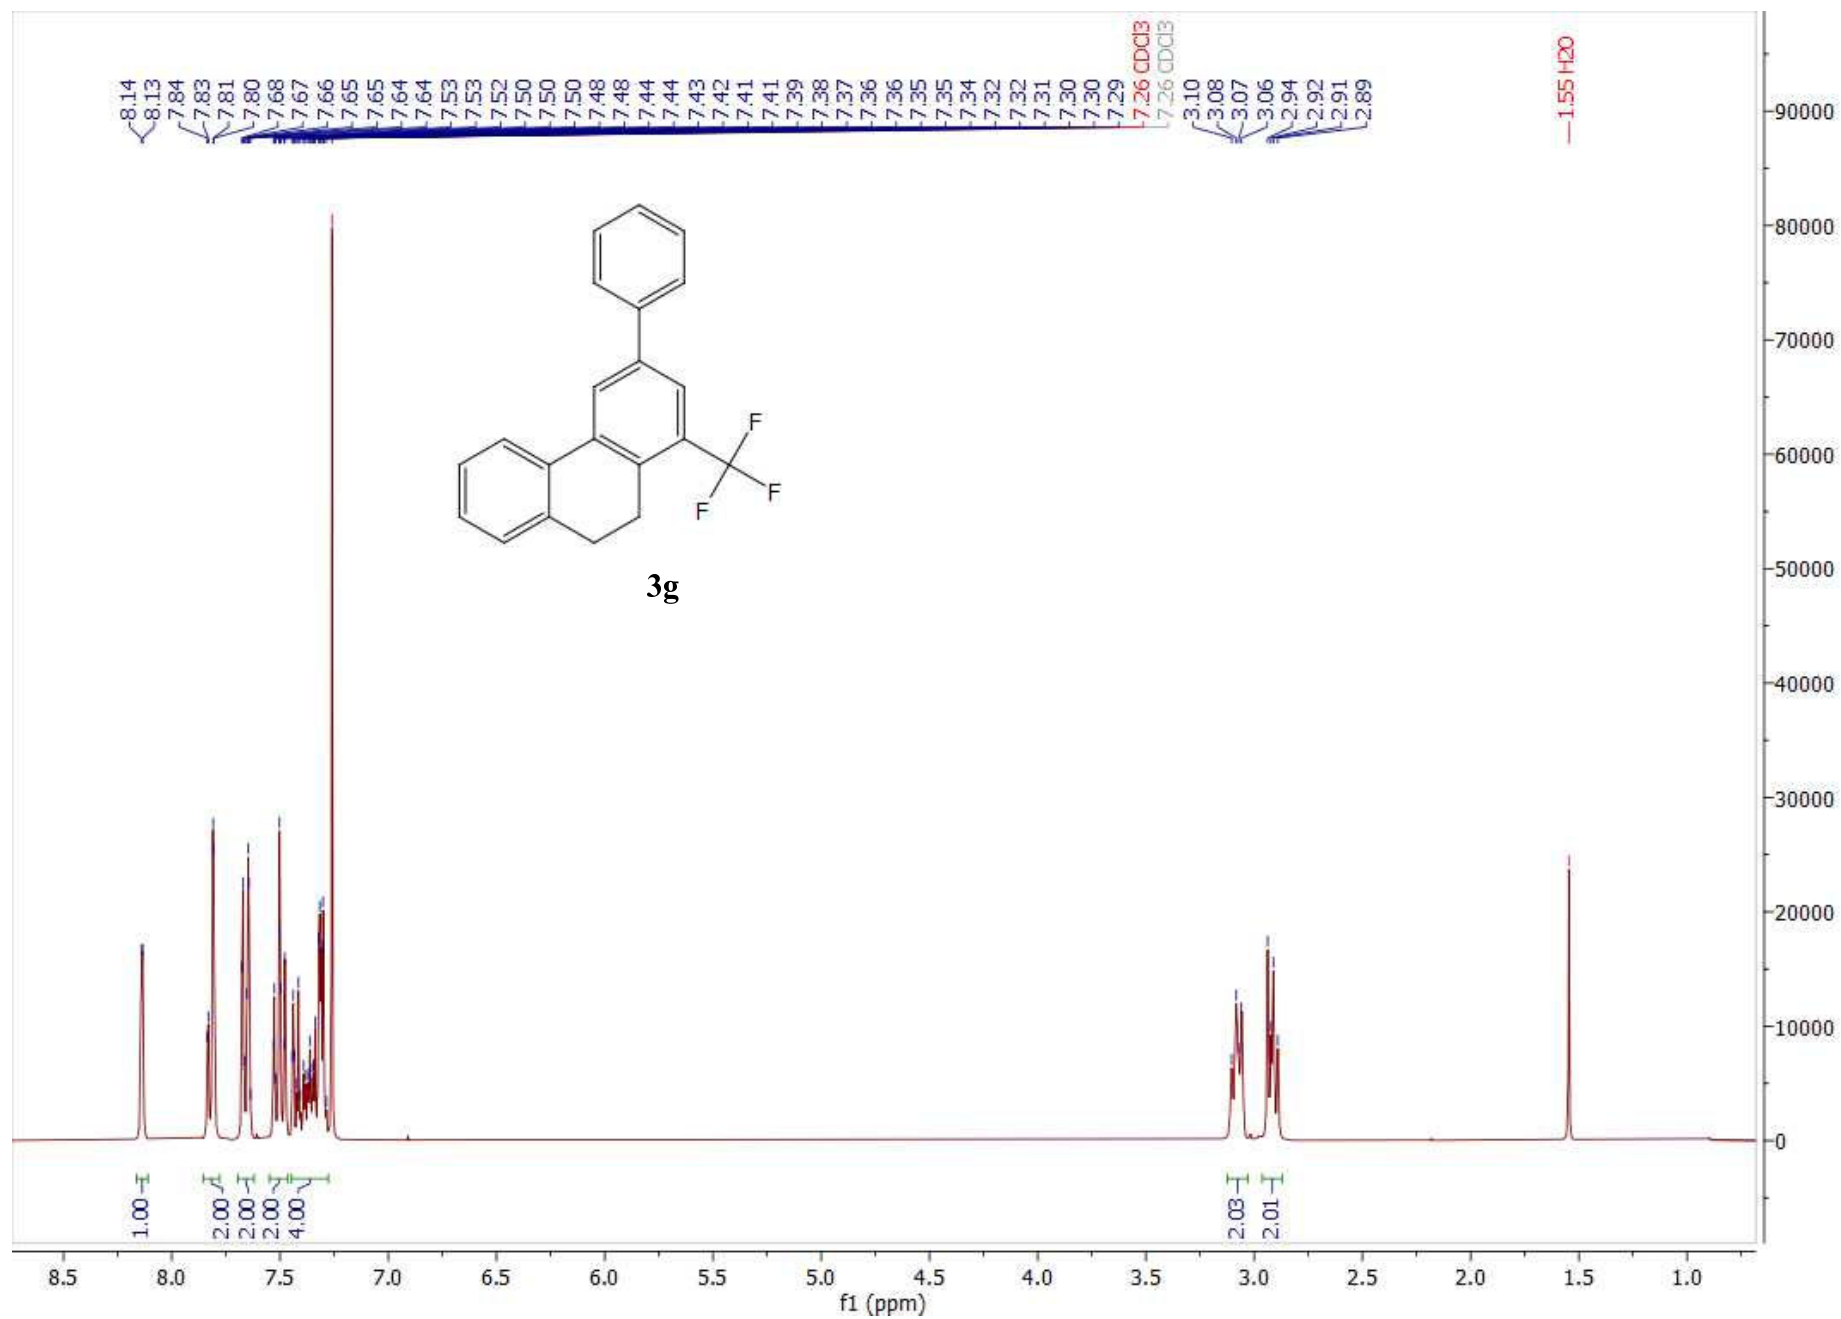

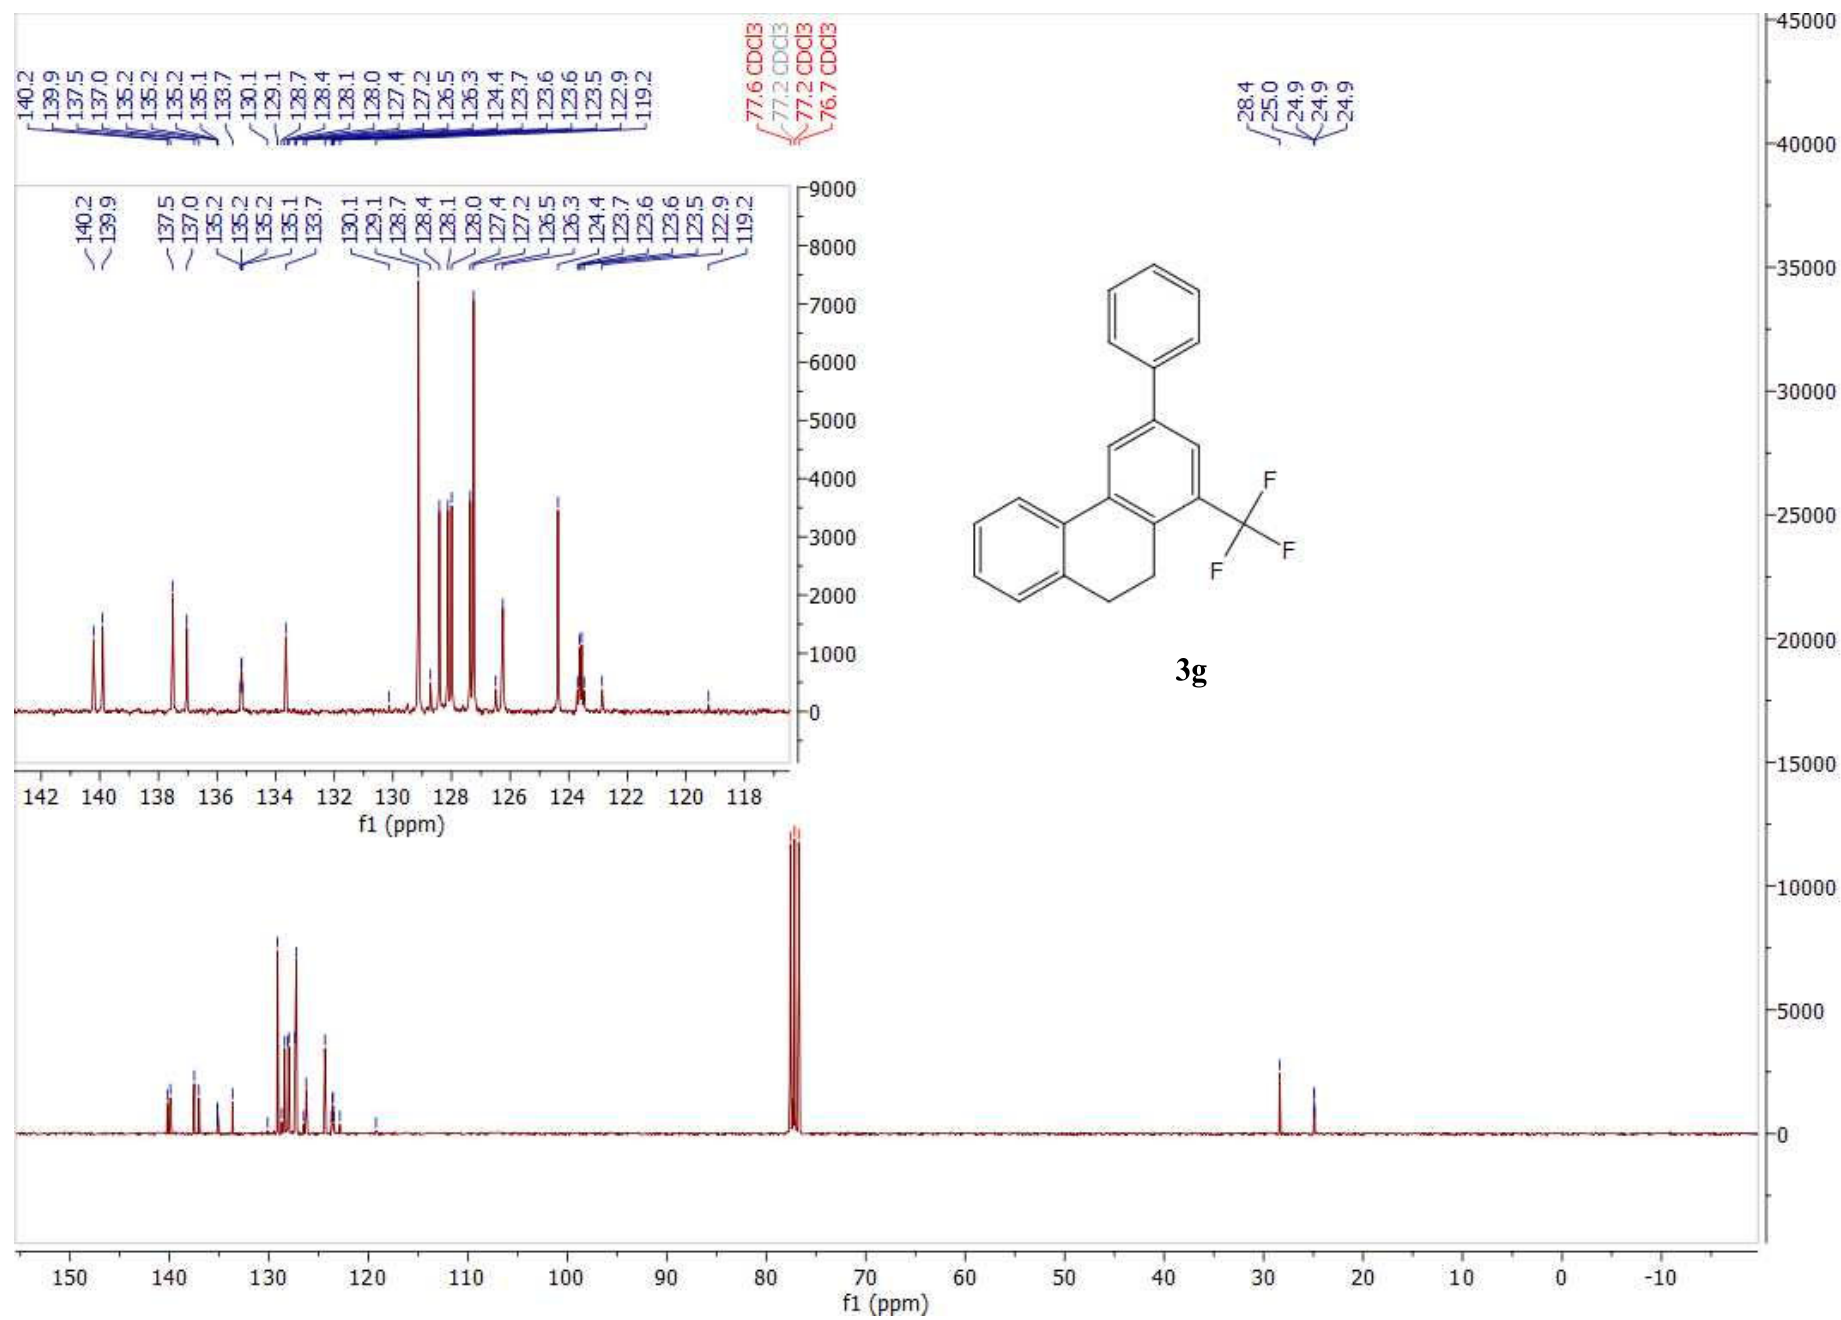

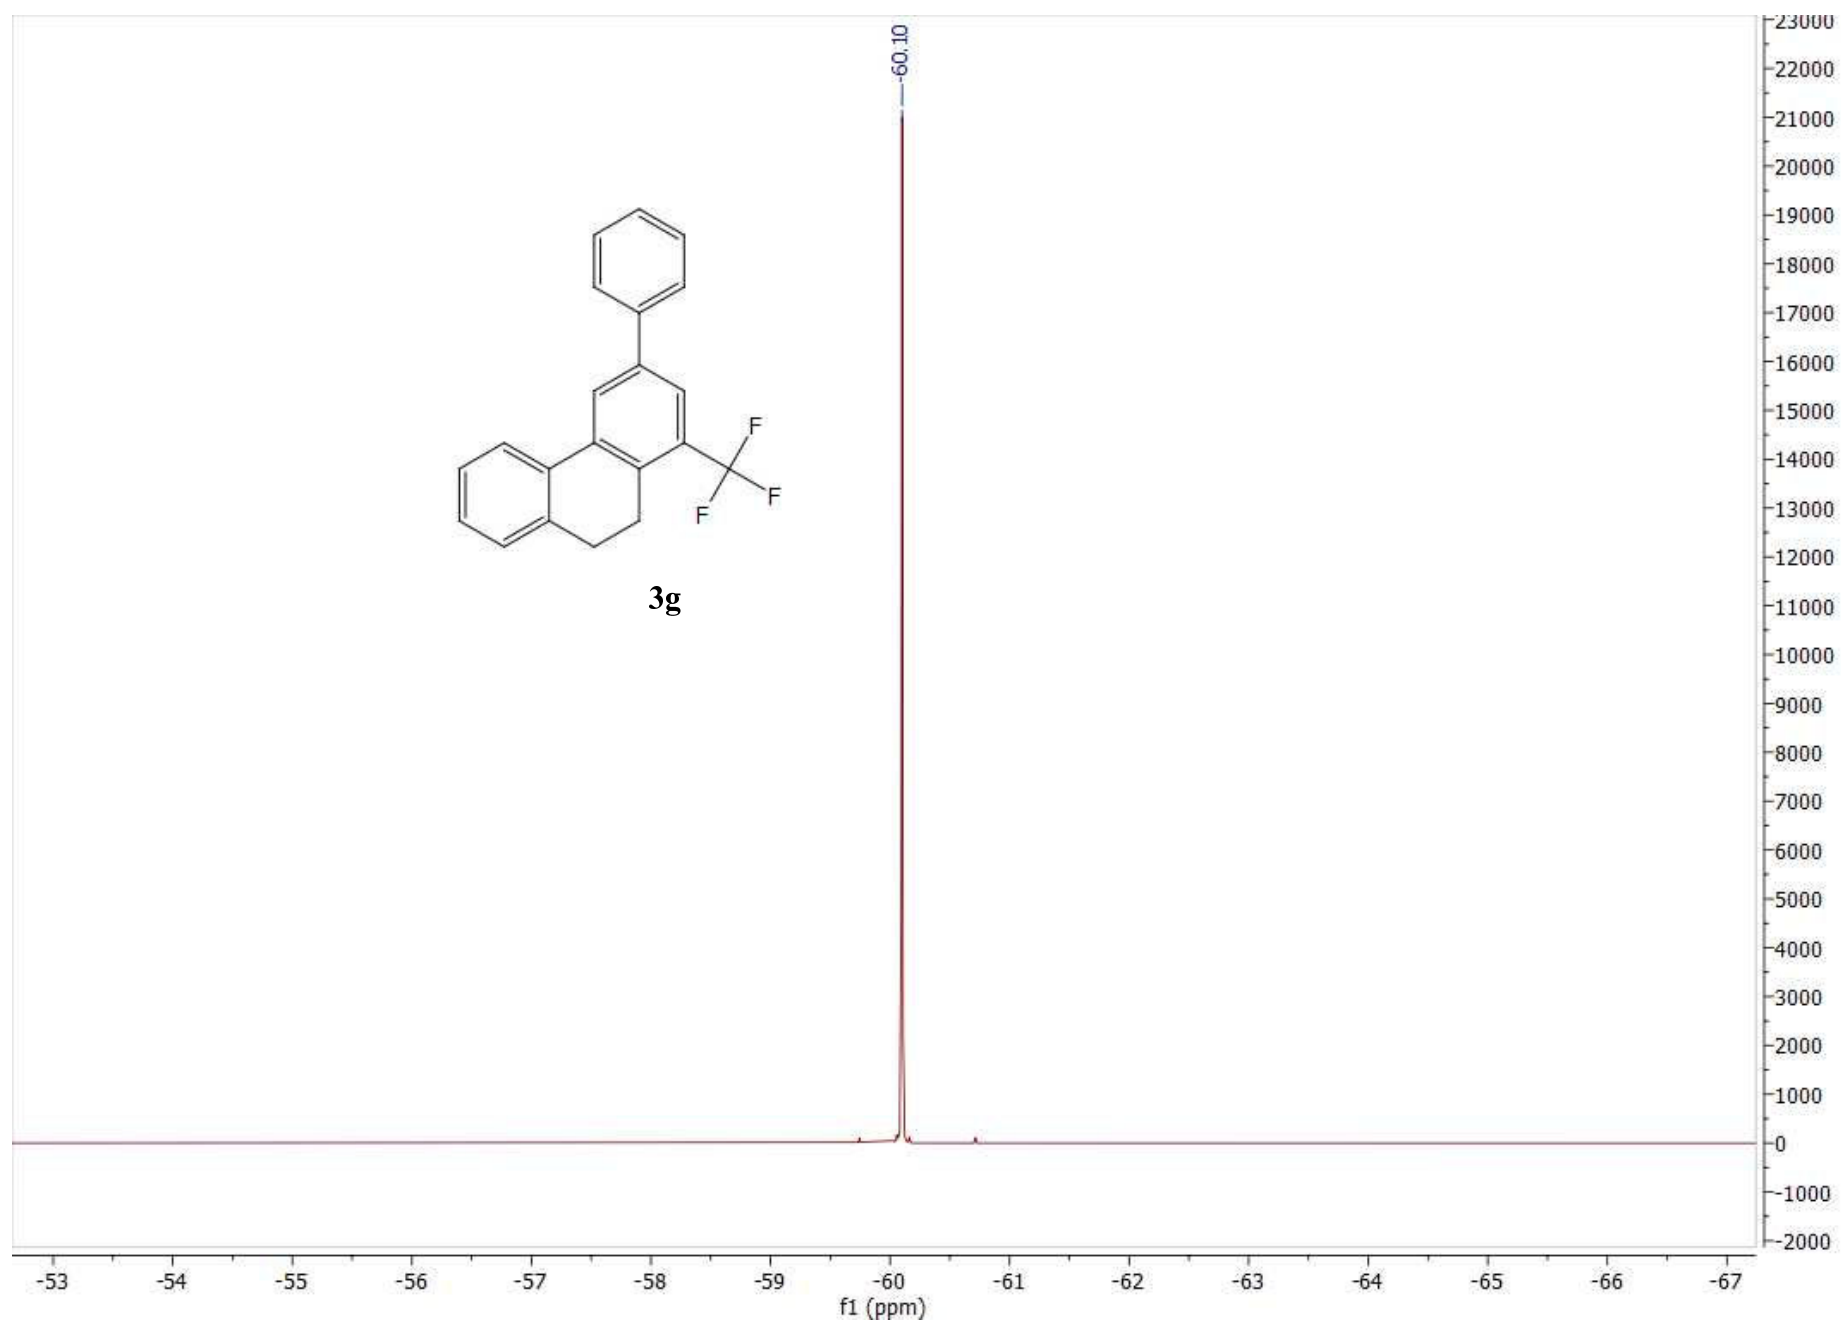

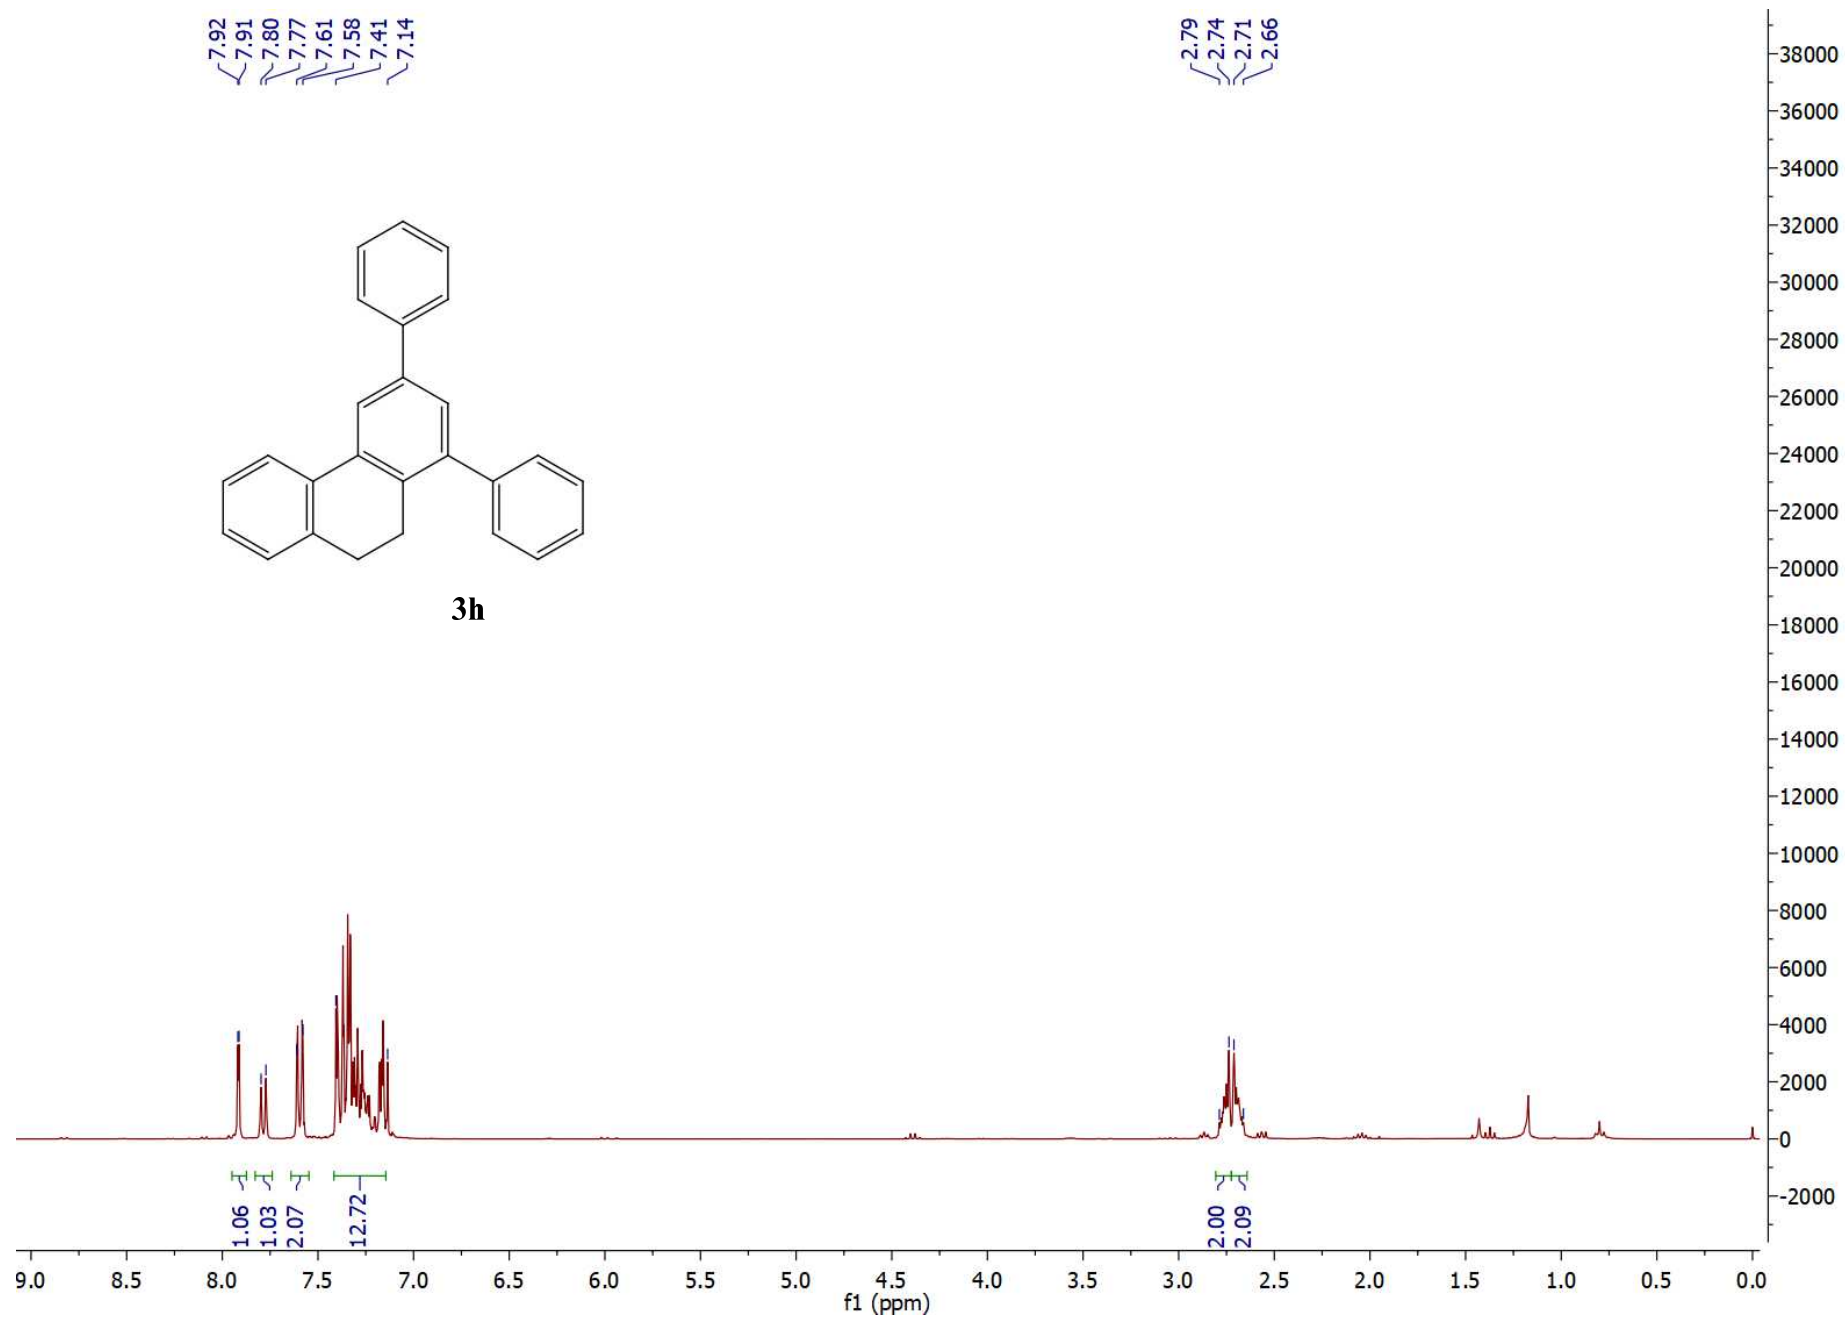



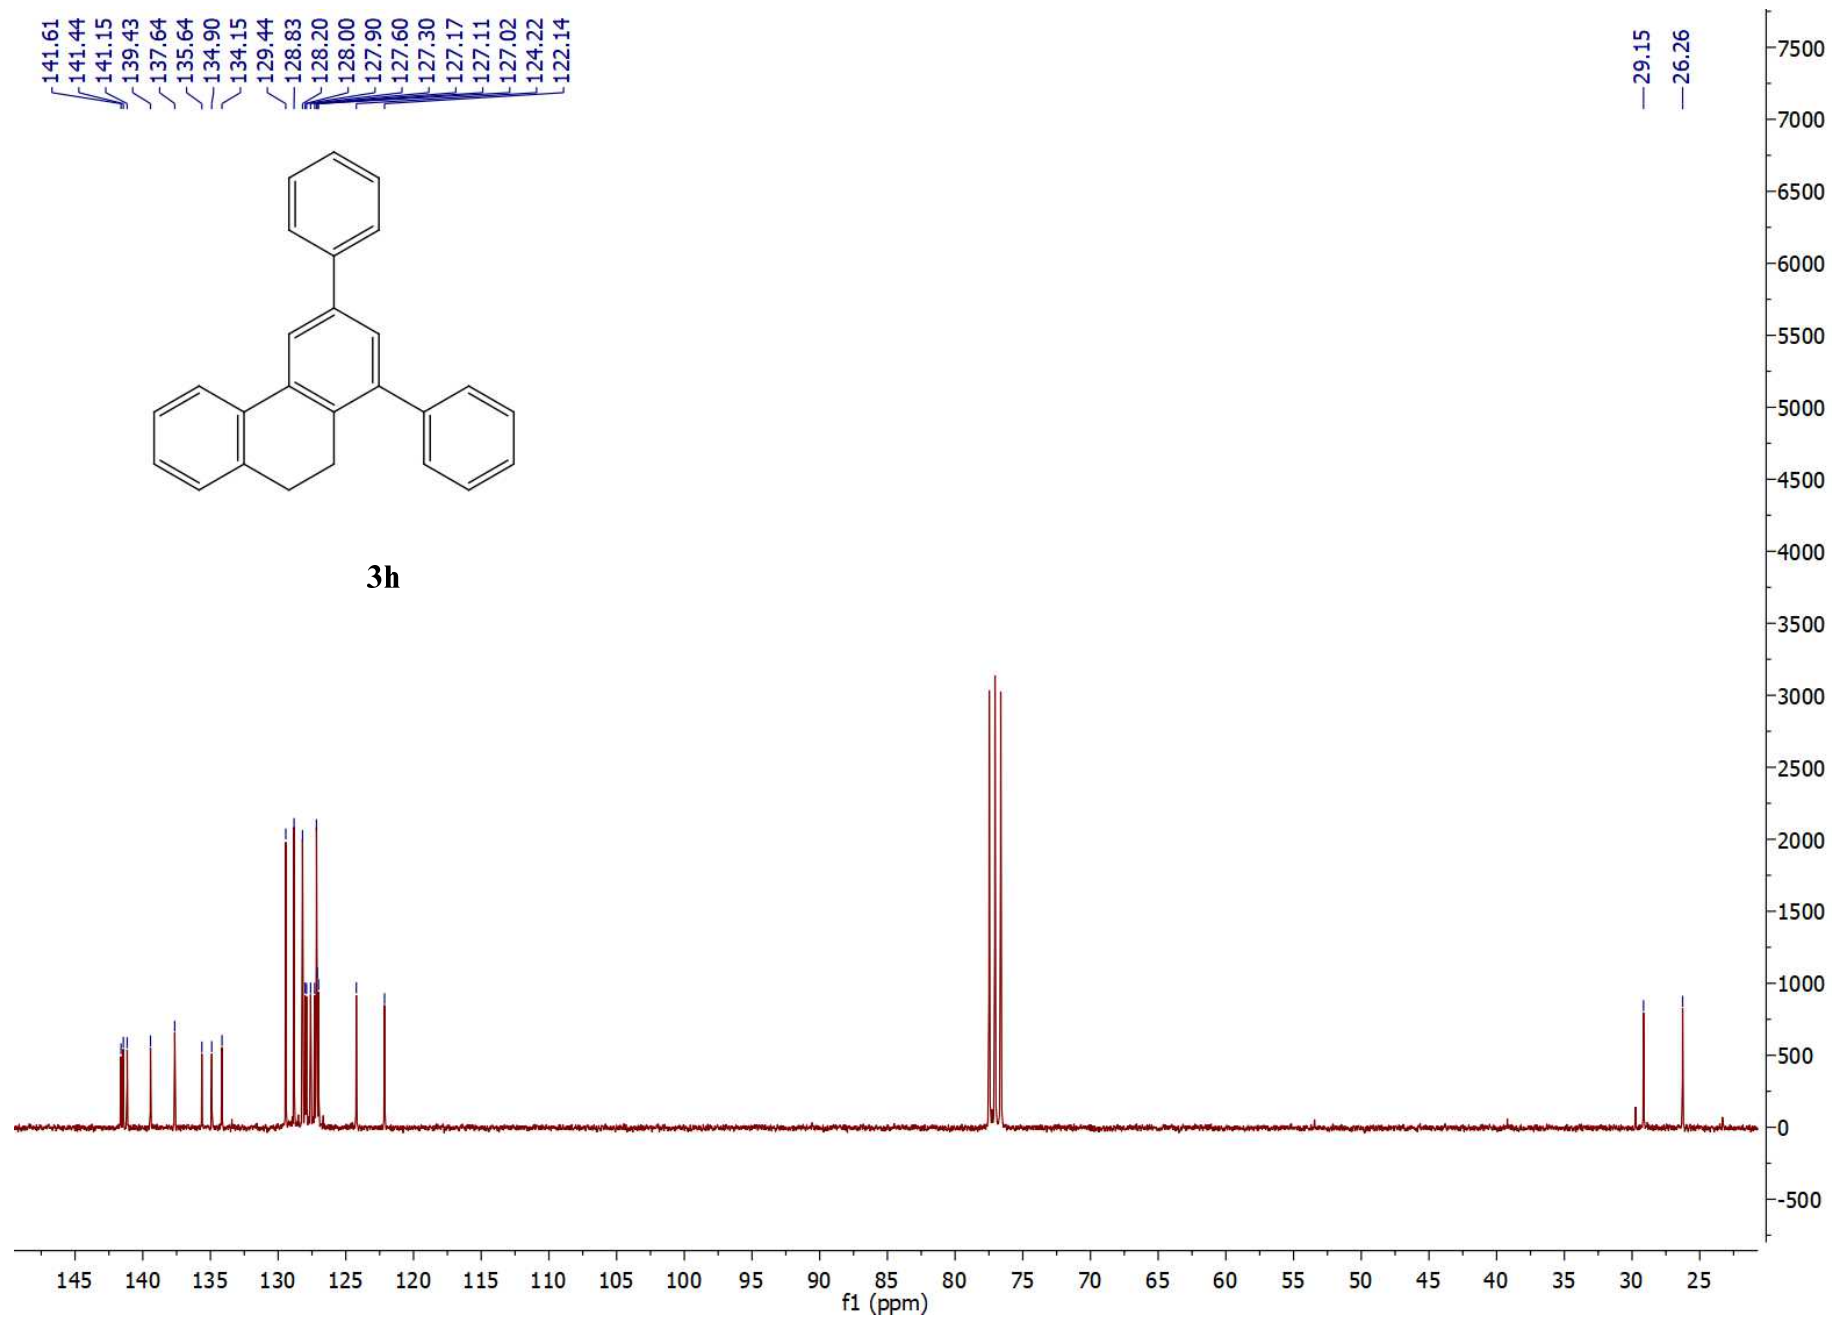

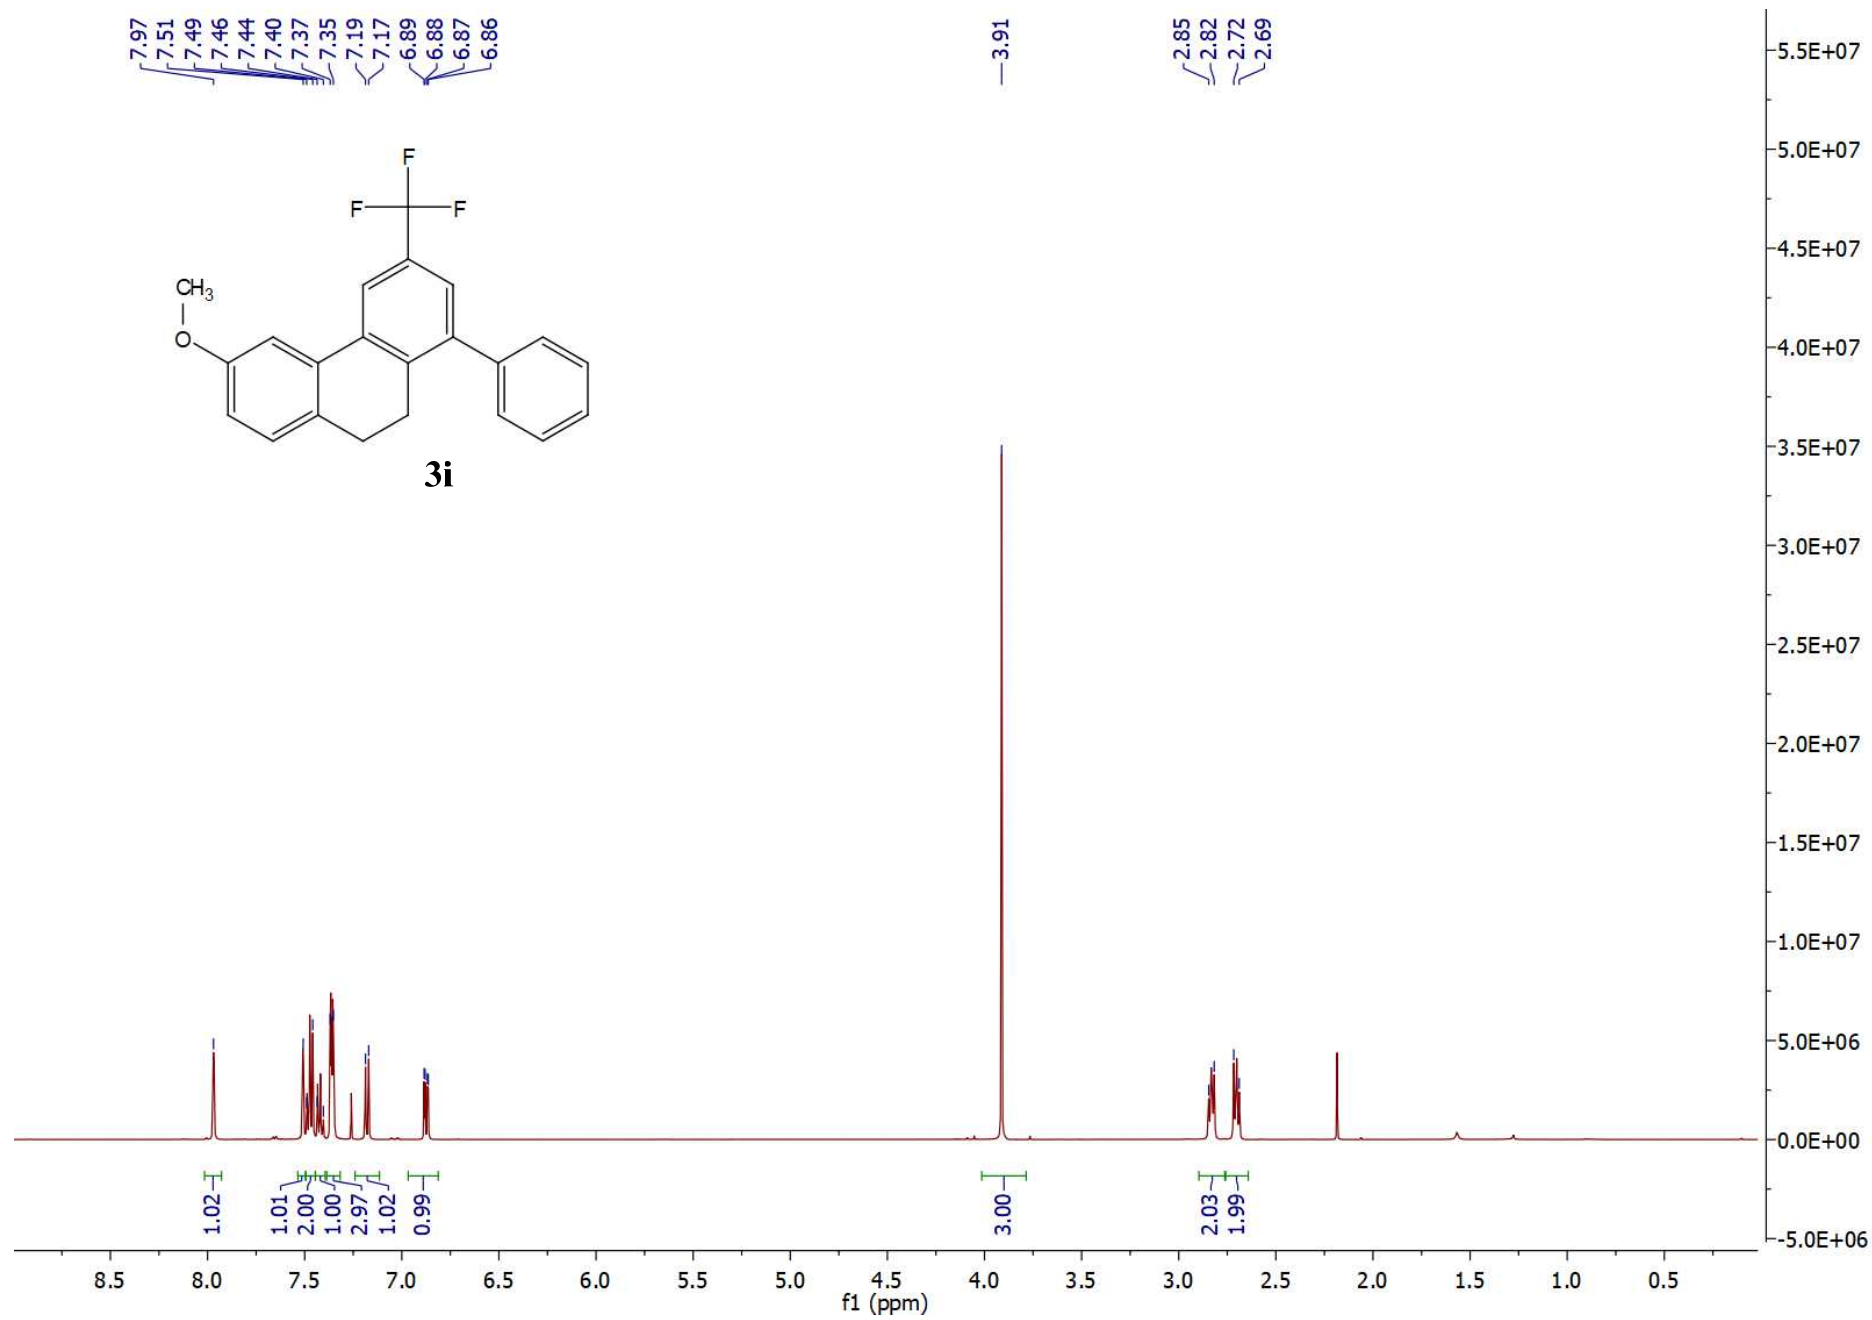

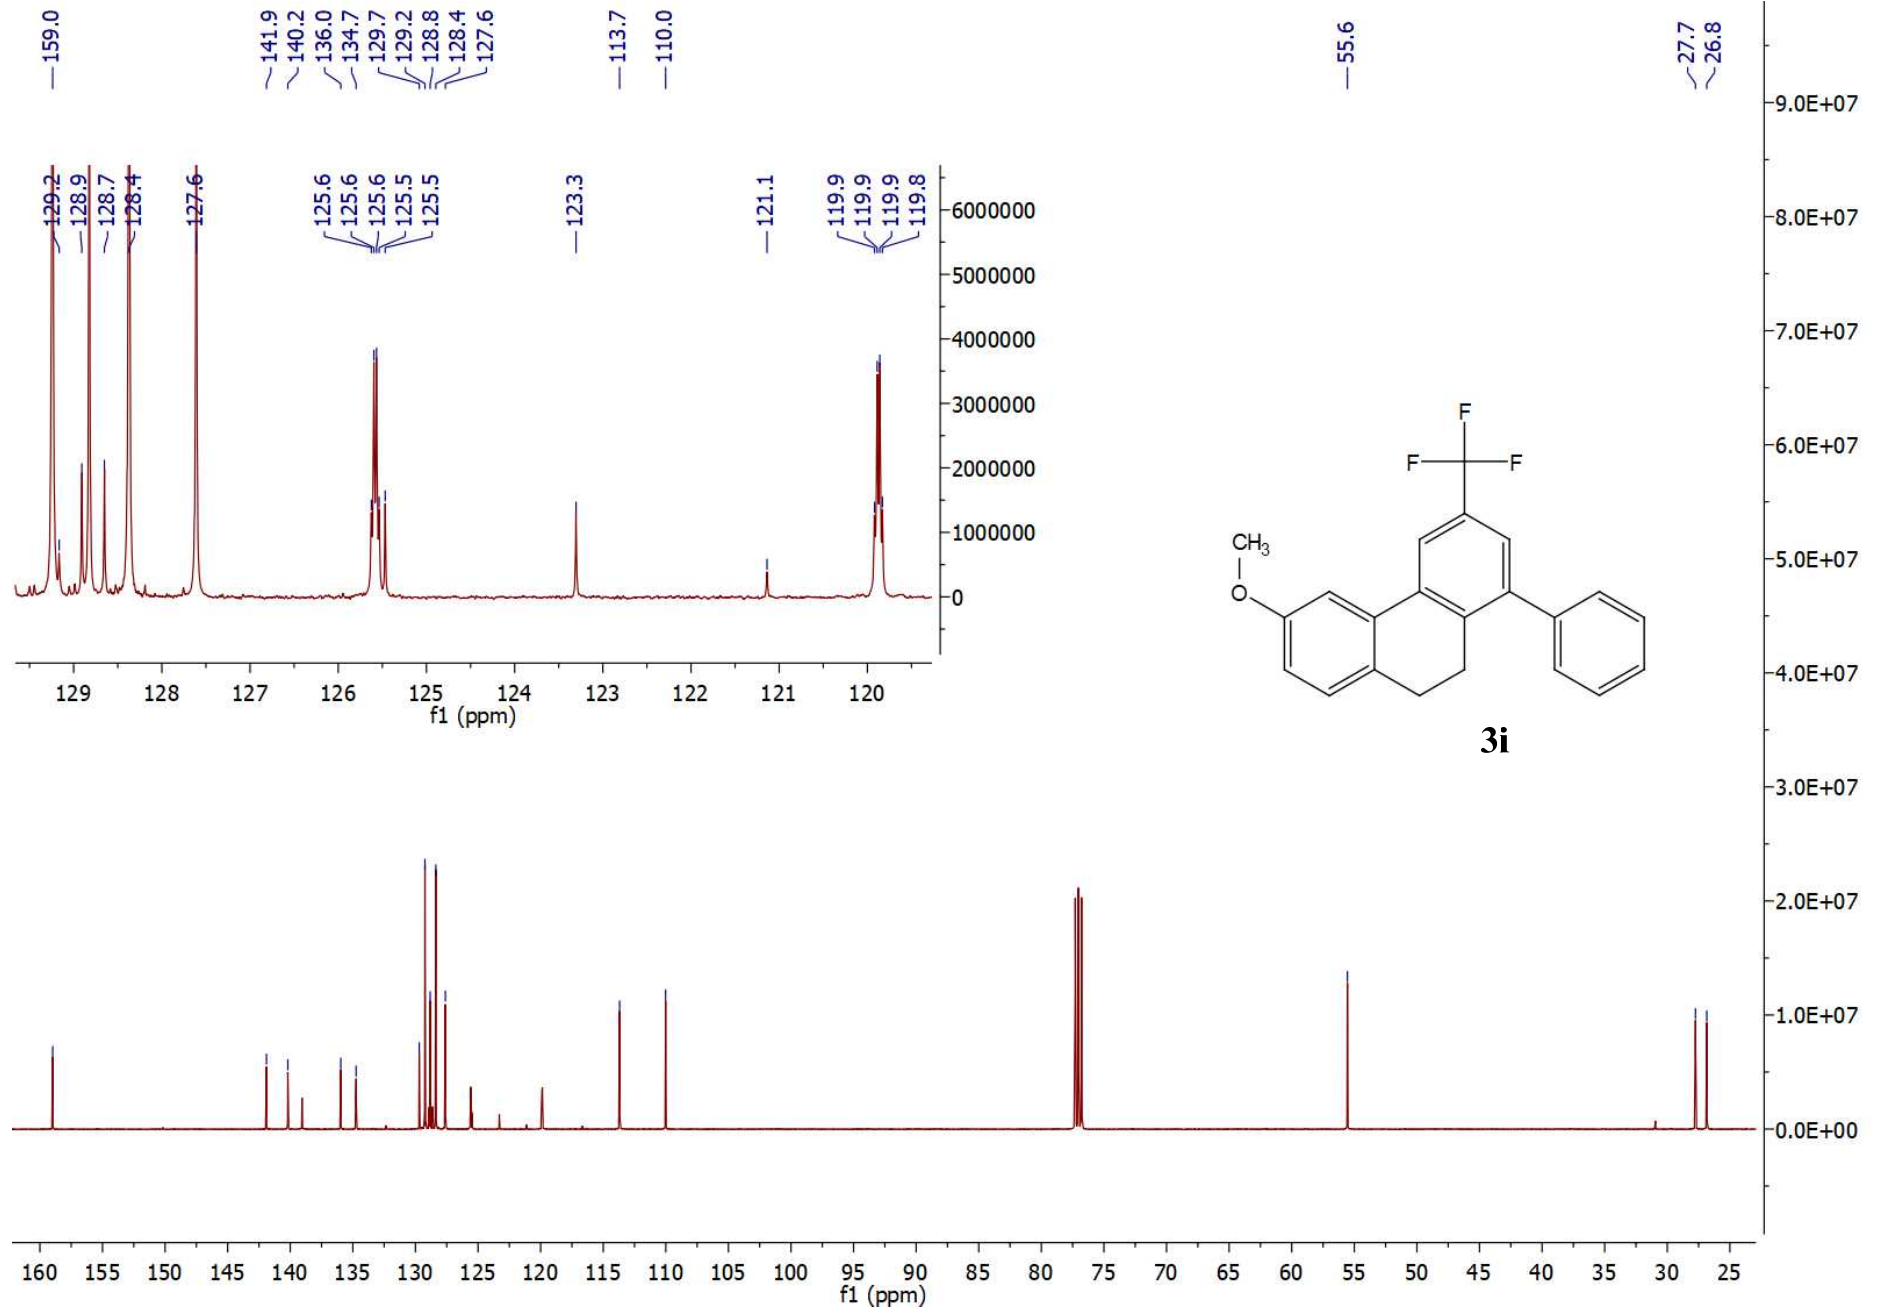

S88

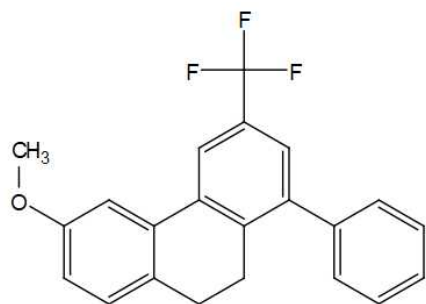

**3i**

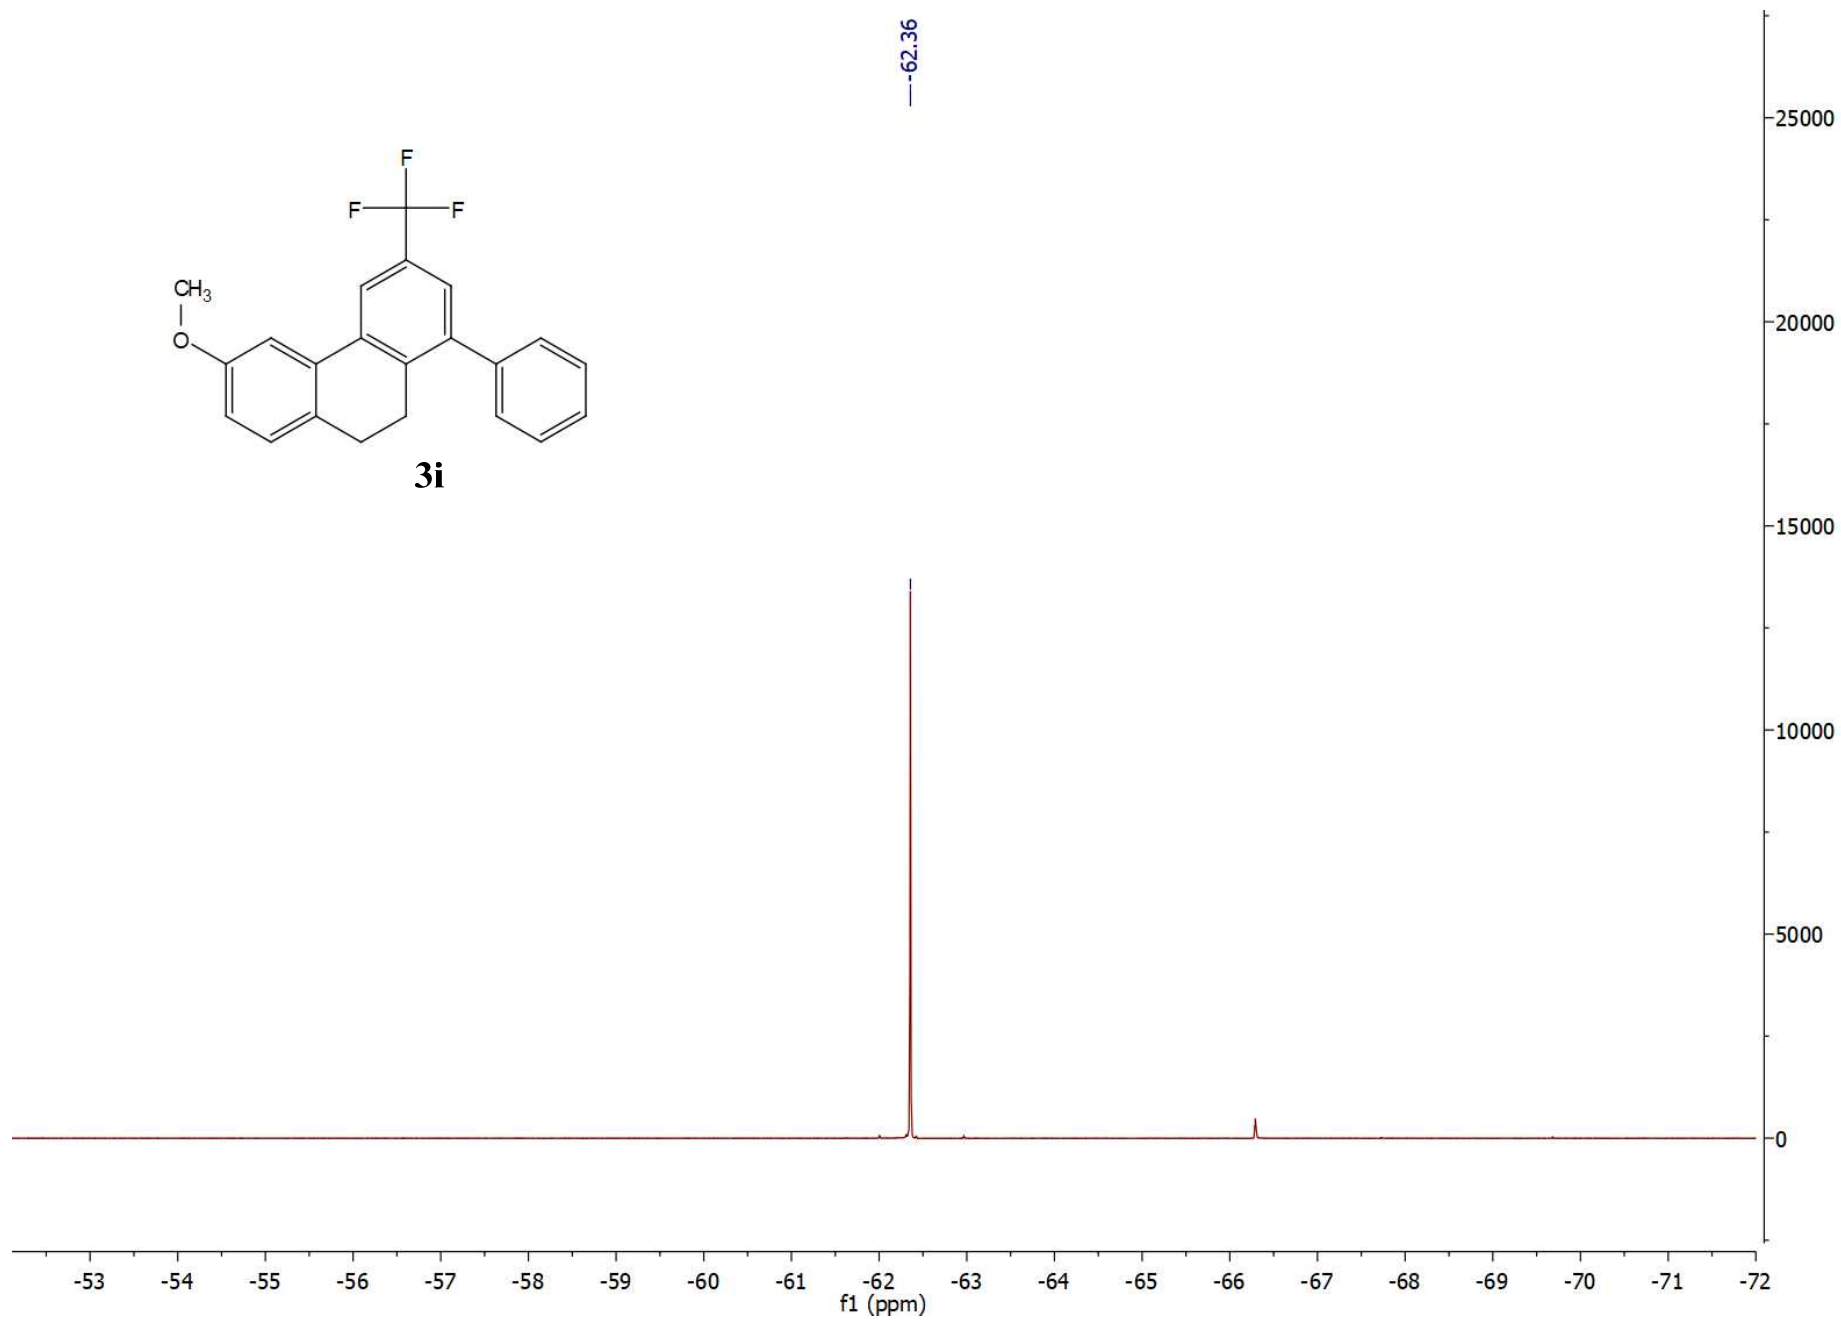

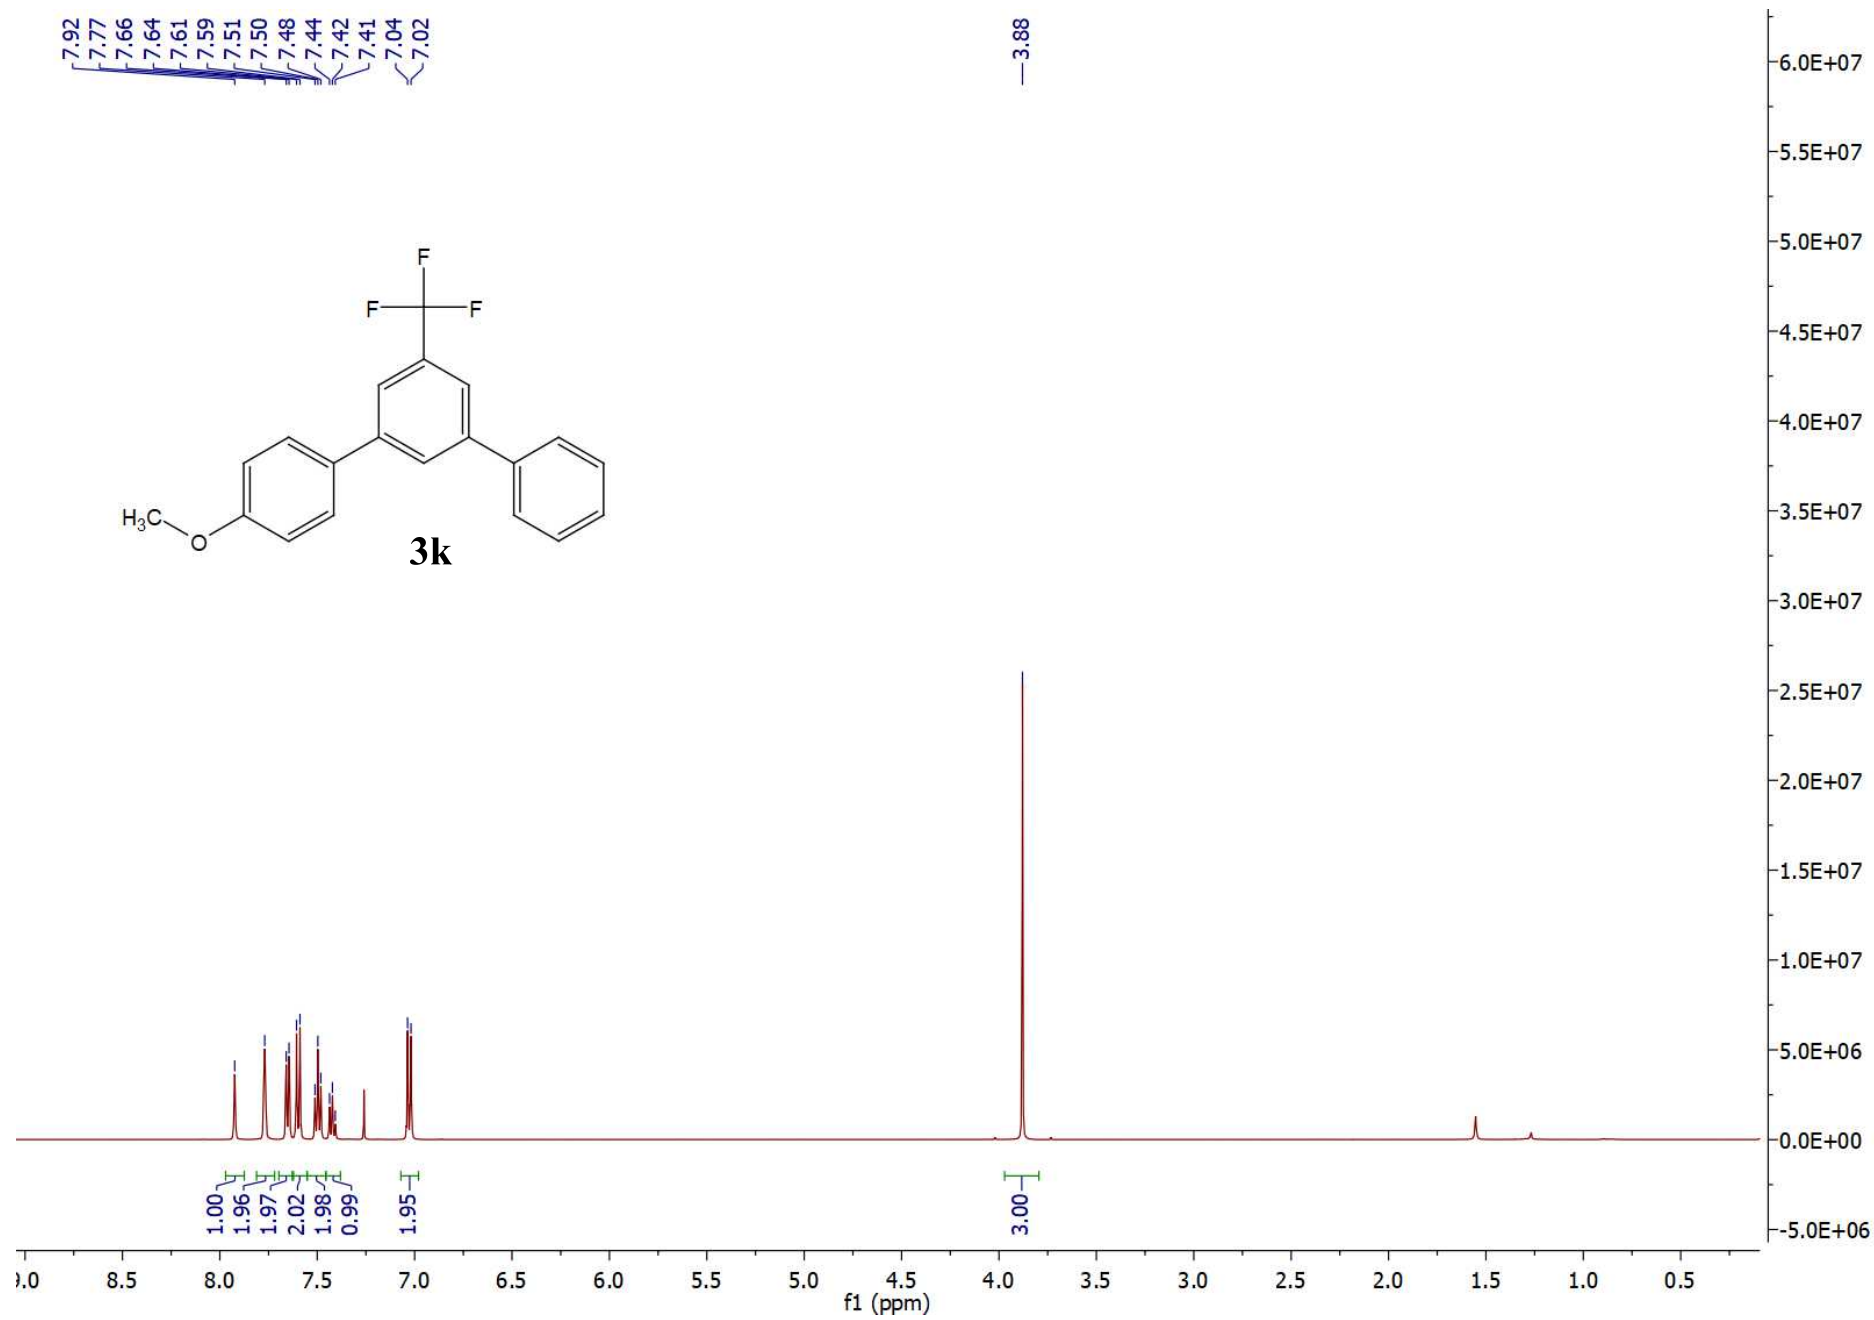

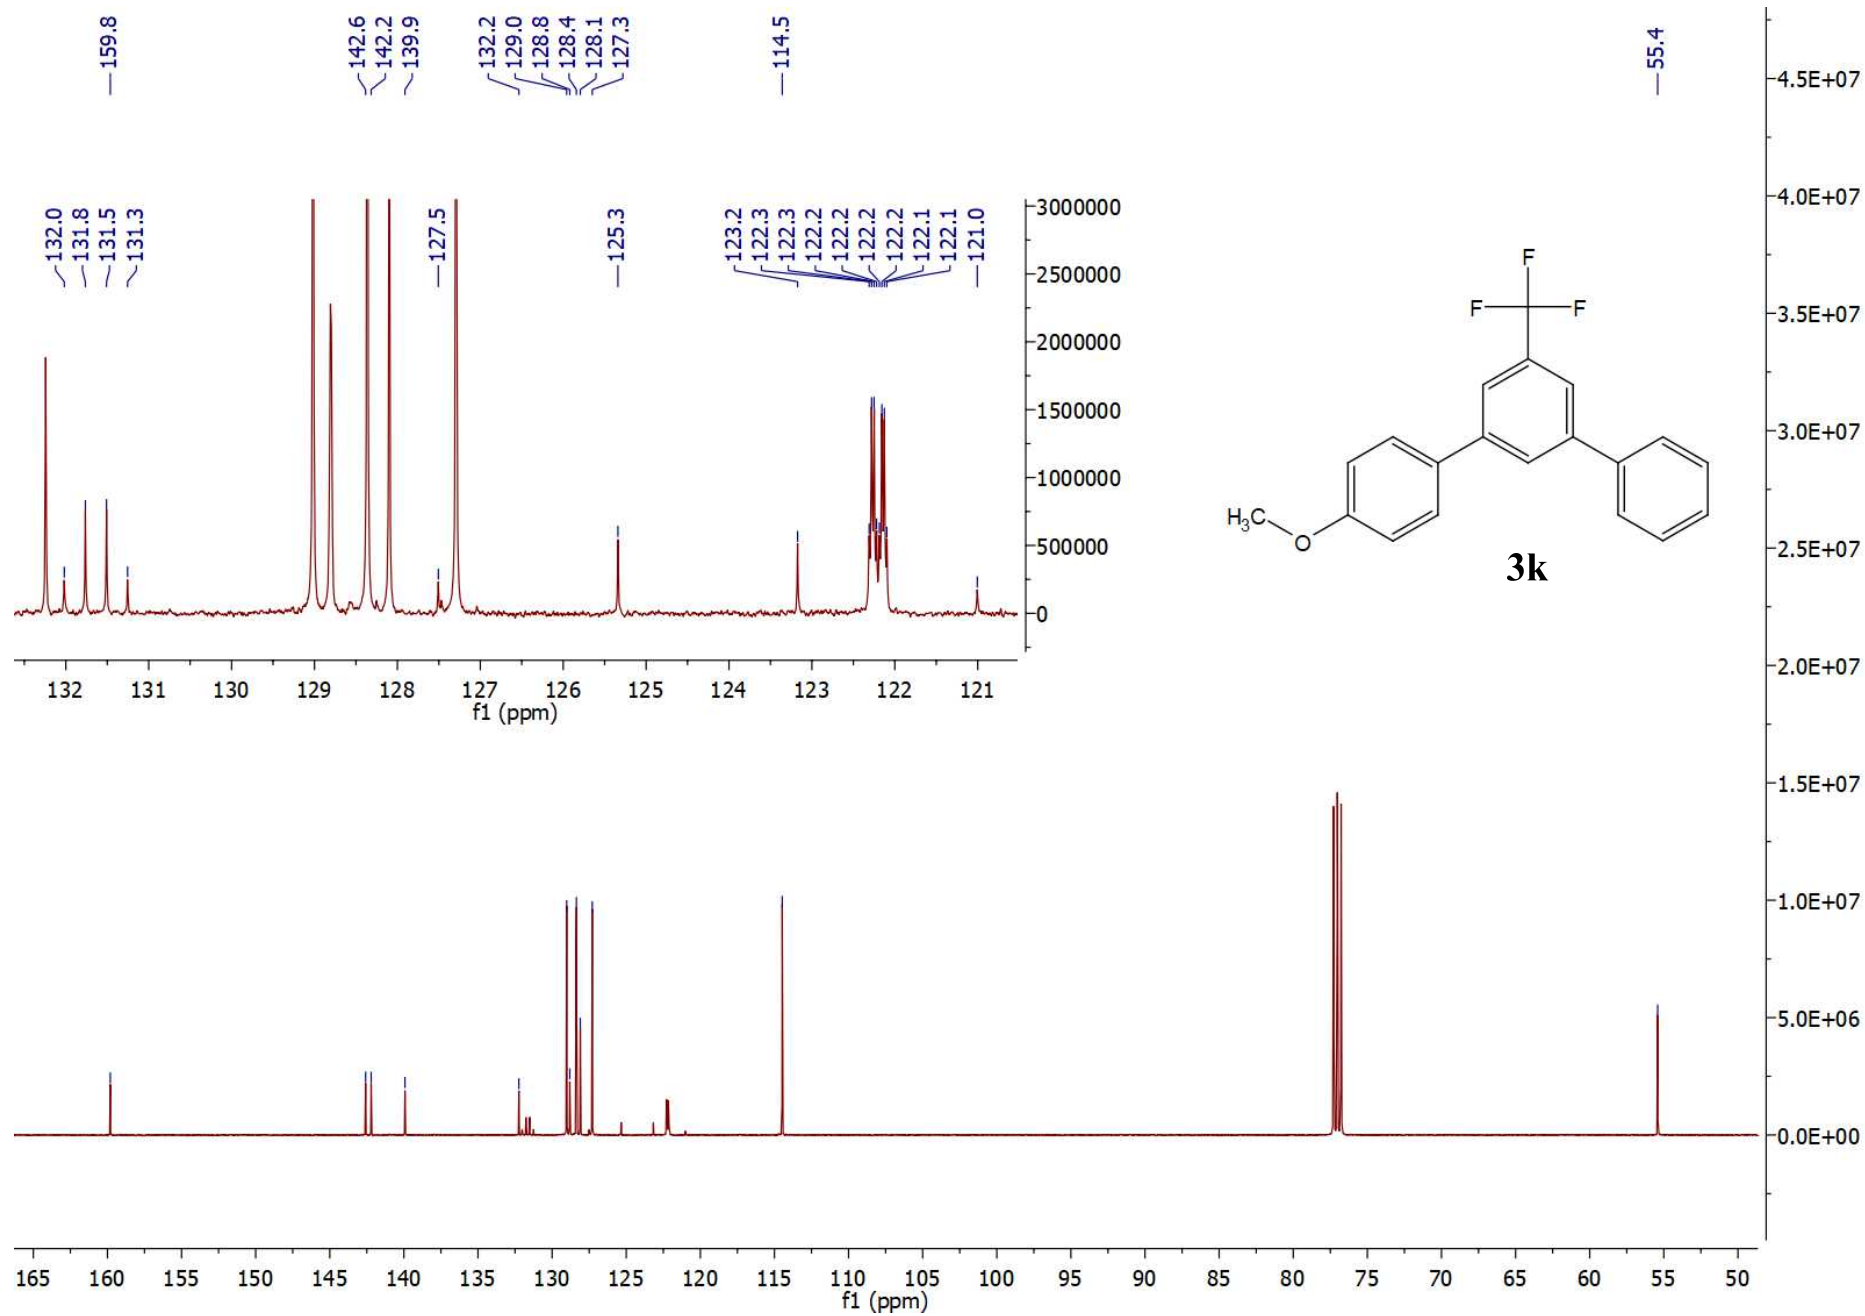

S91

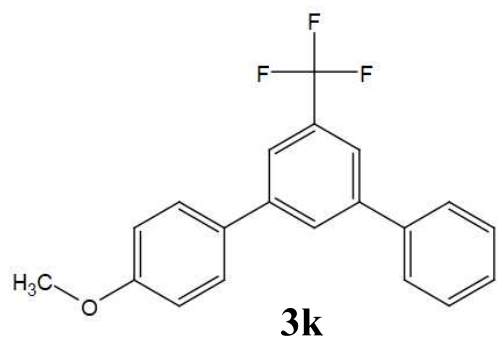

---62.48

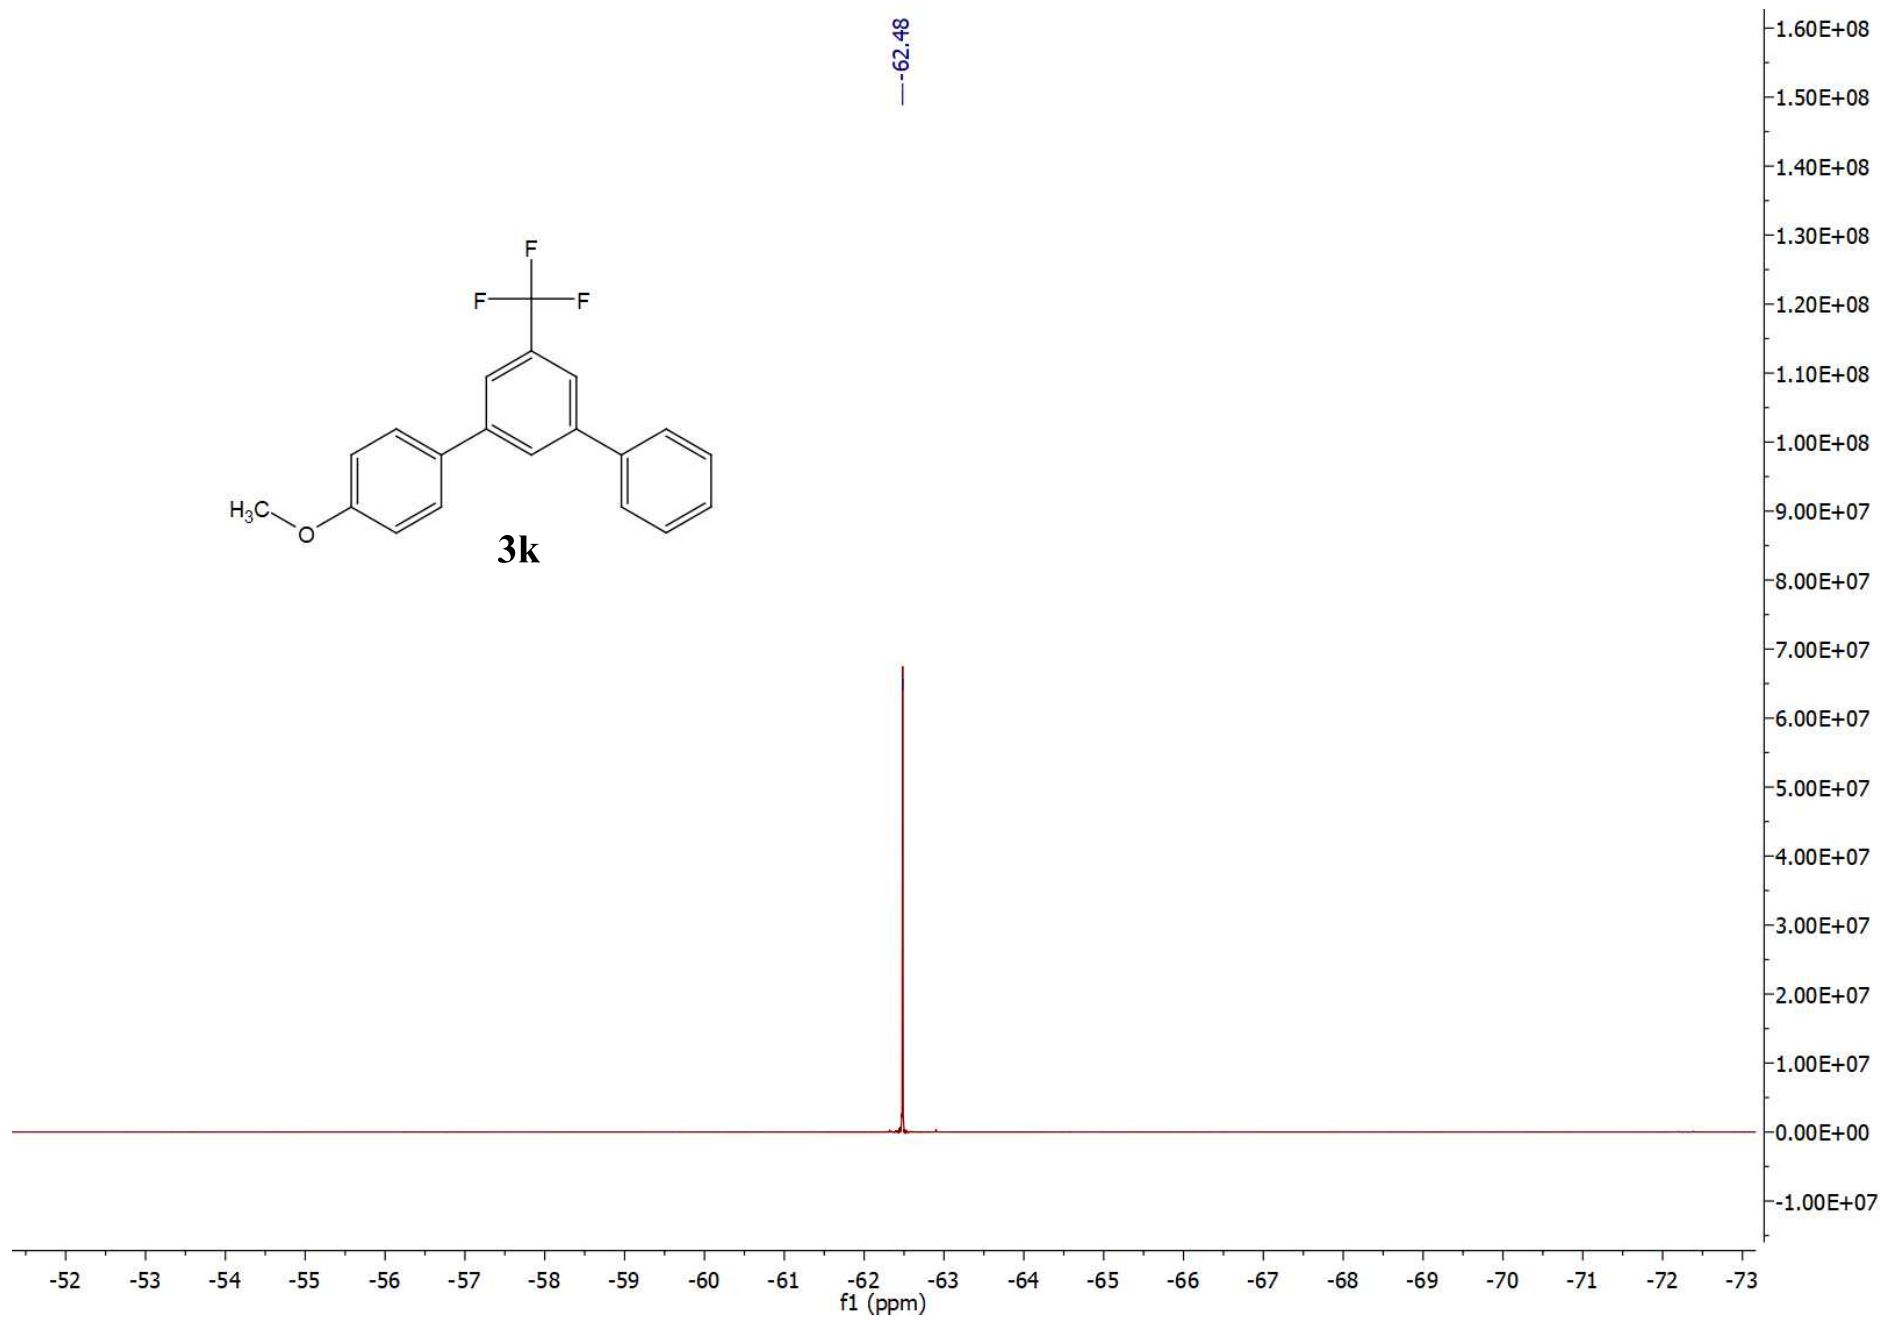

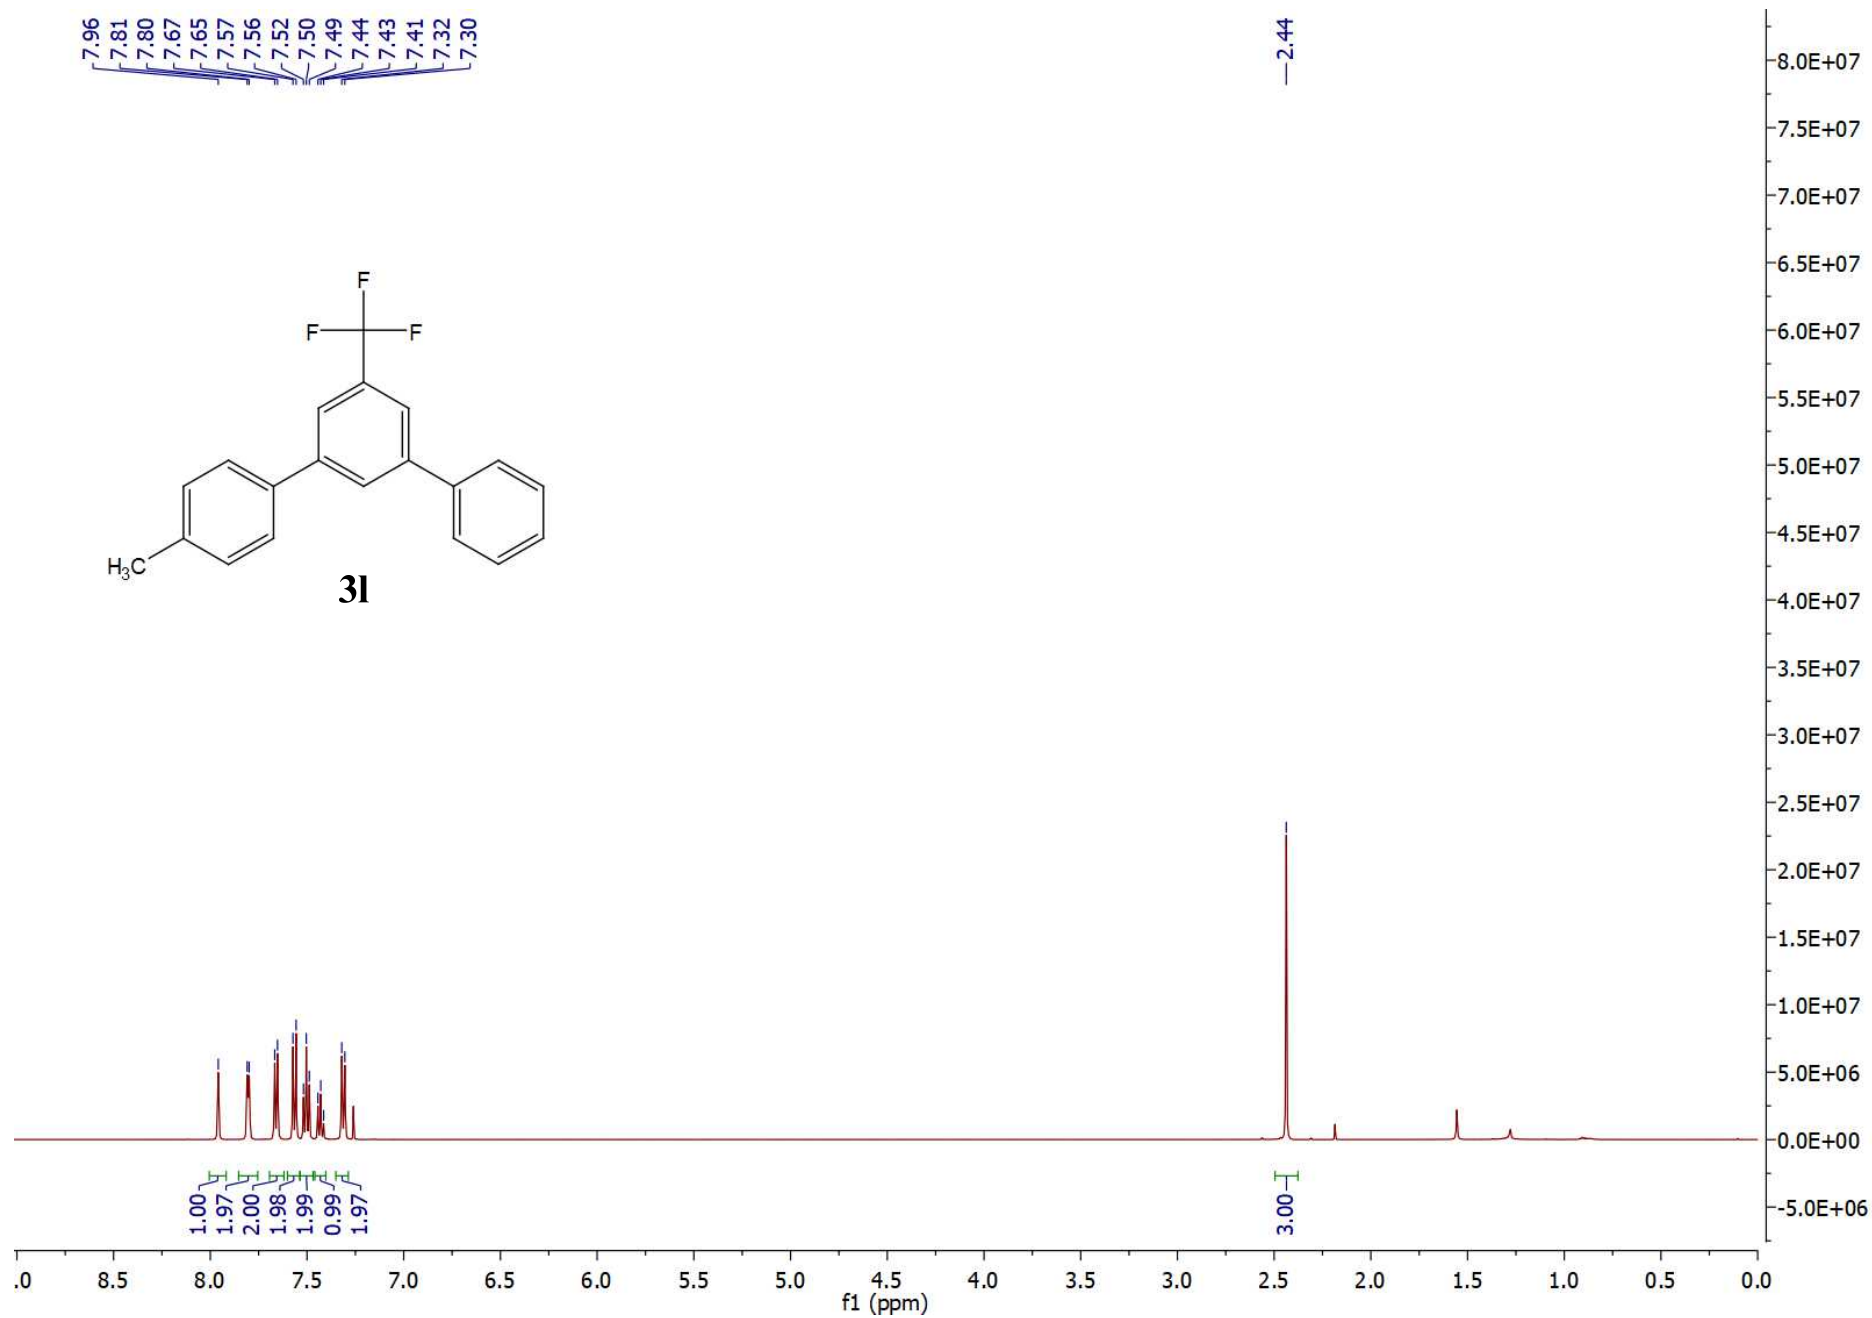



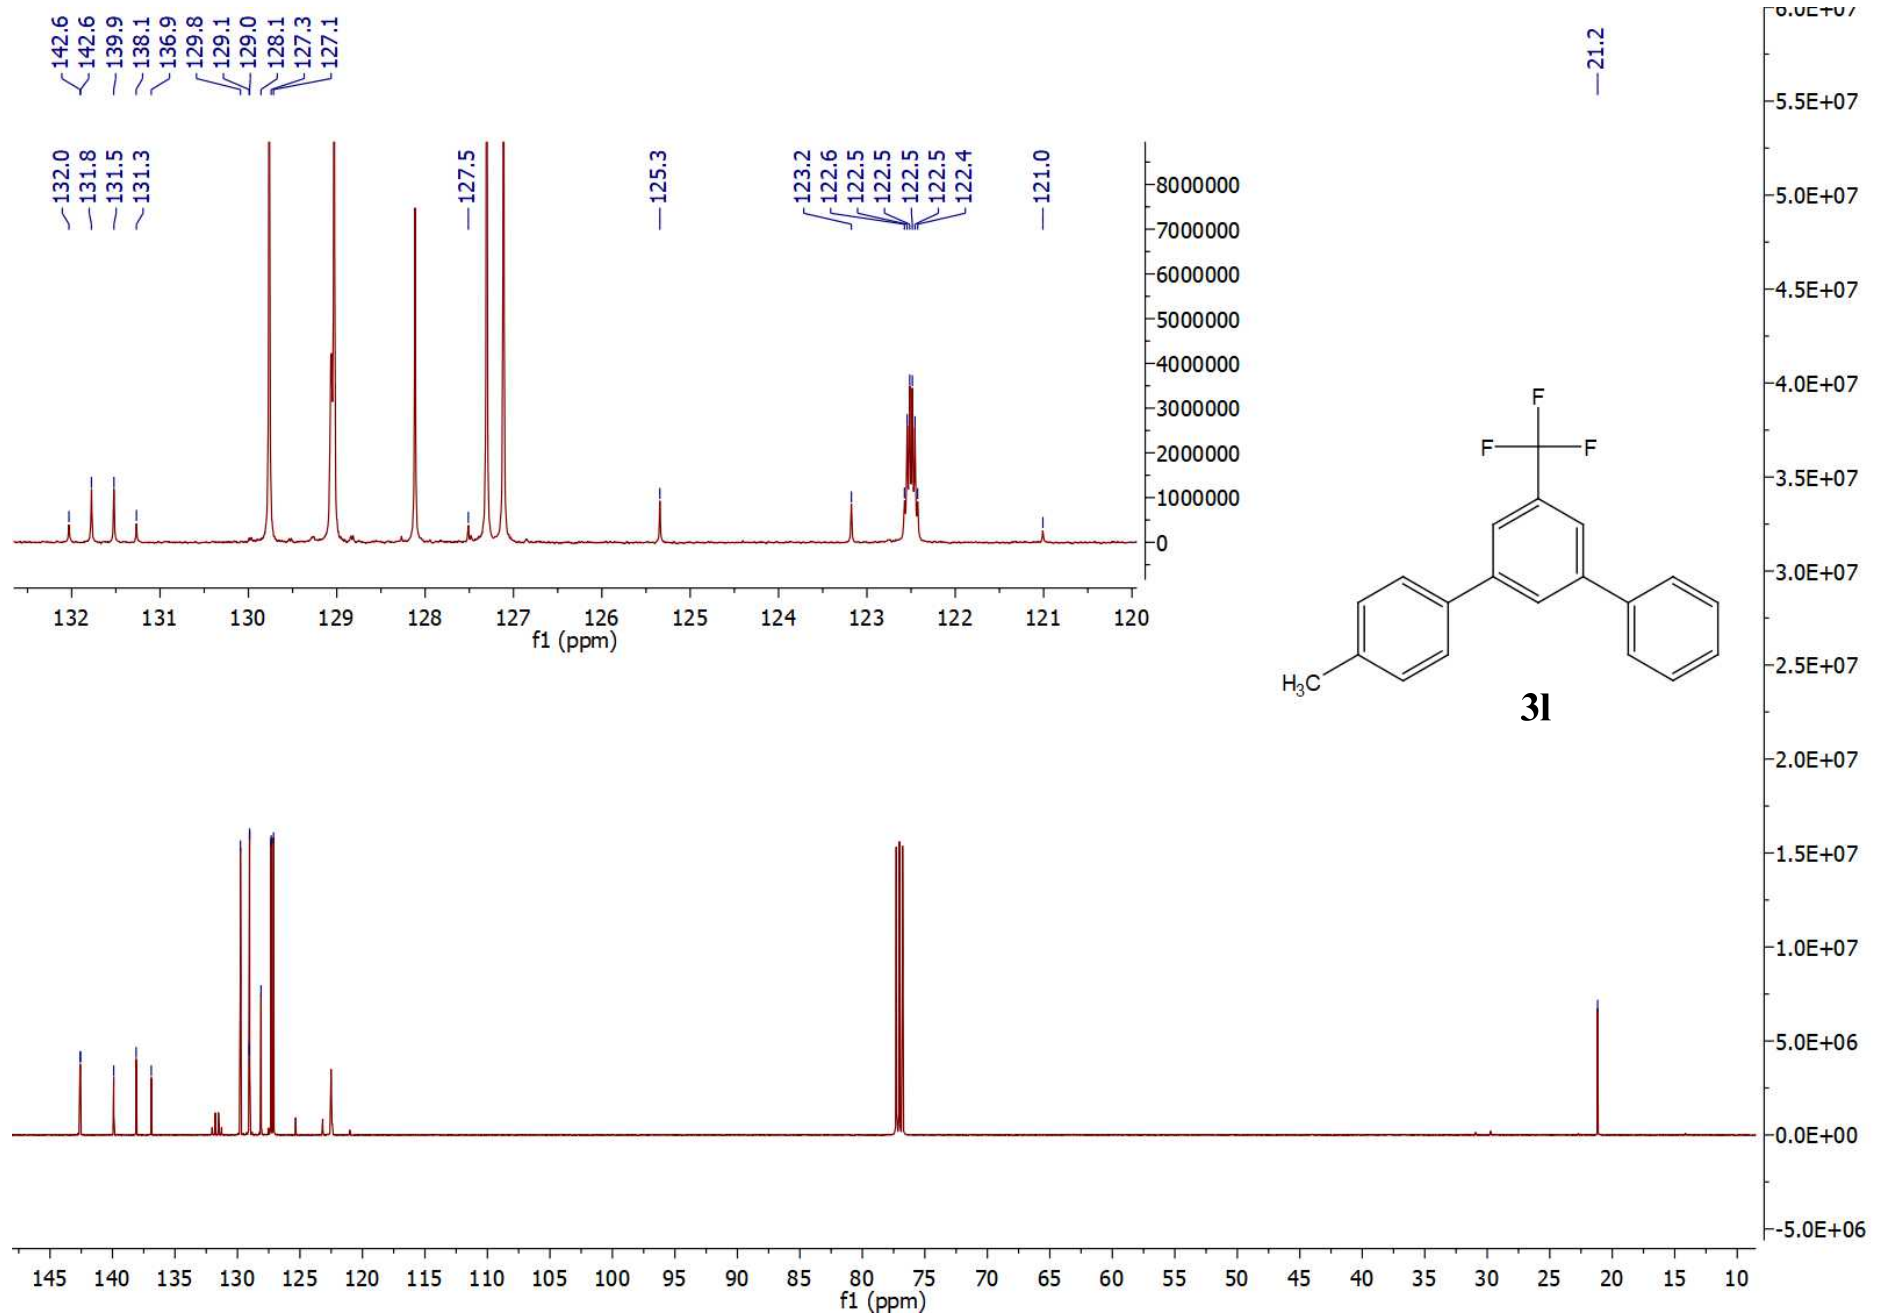

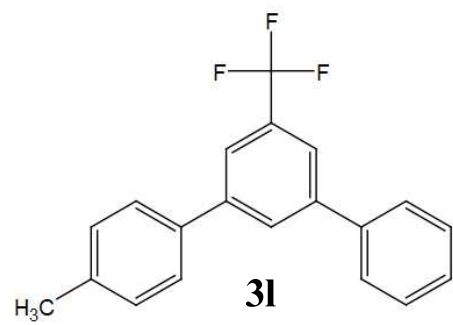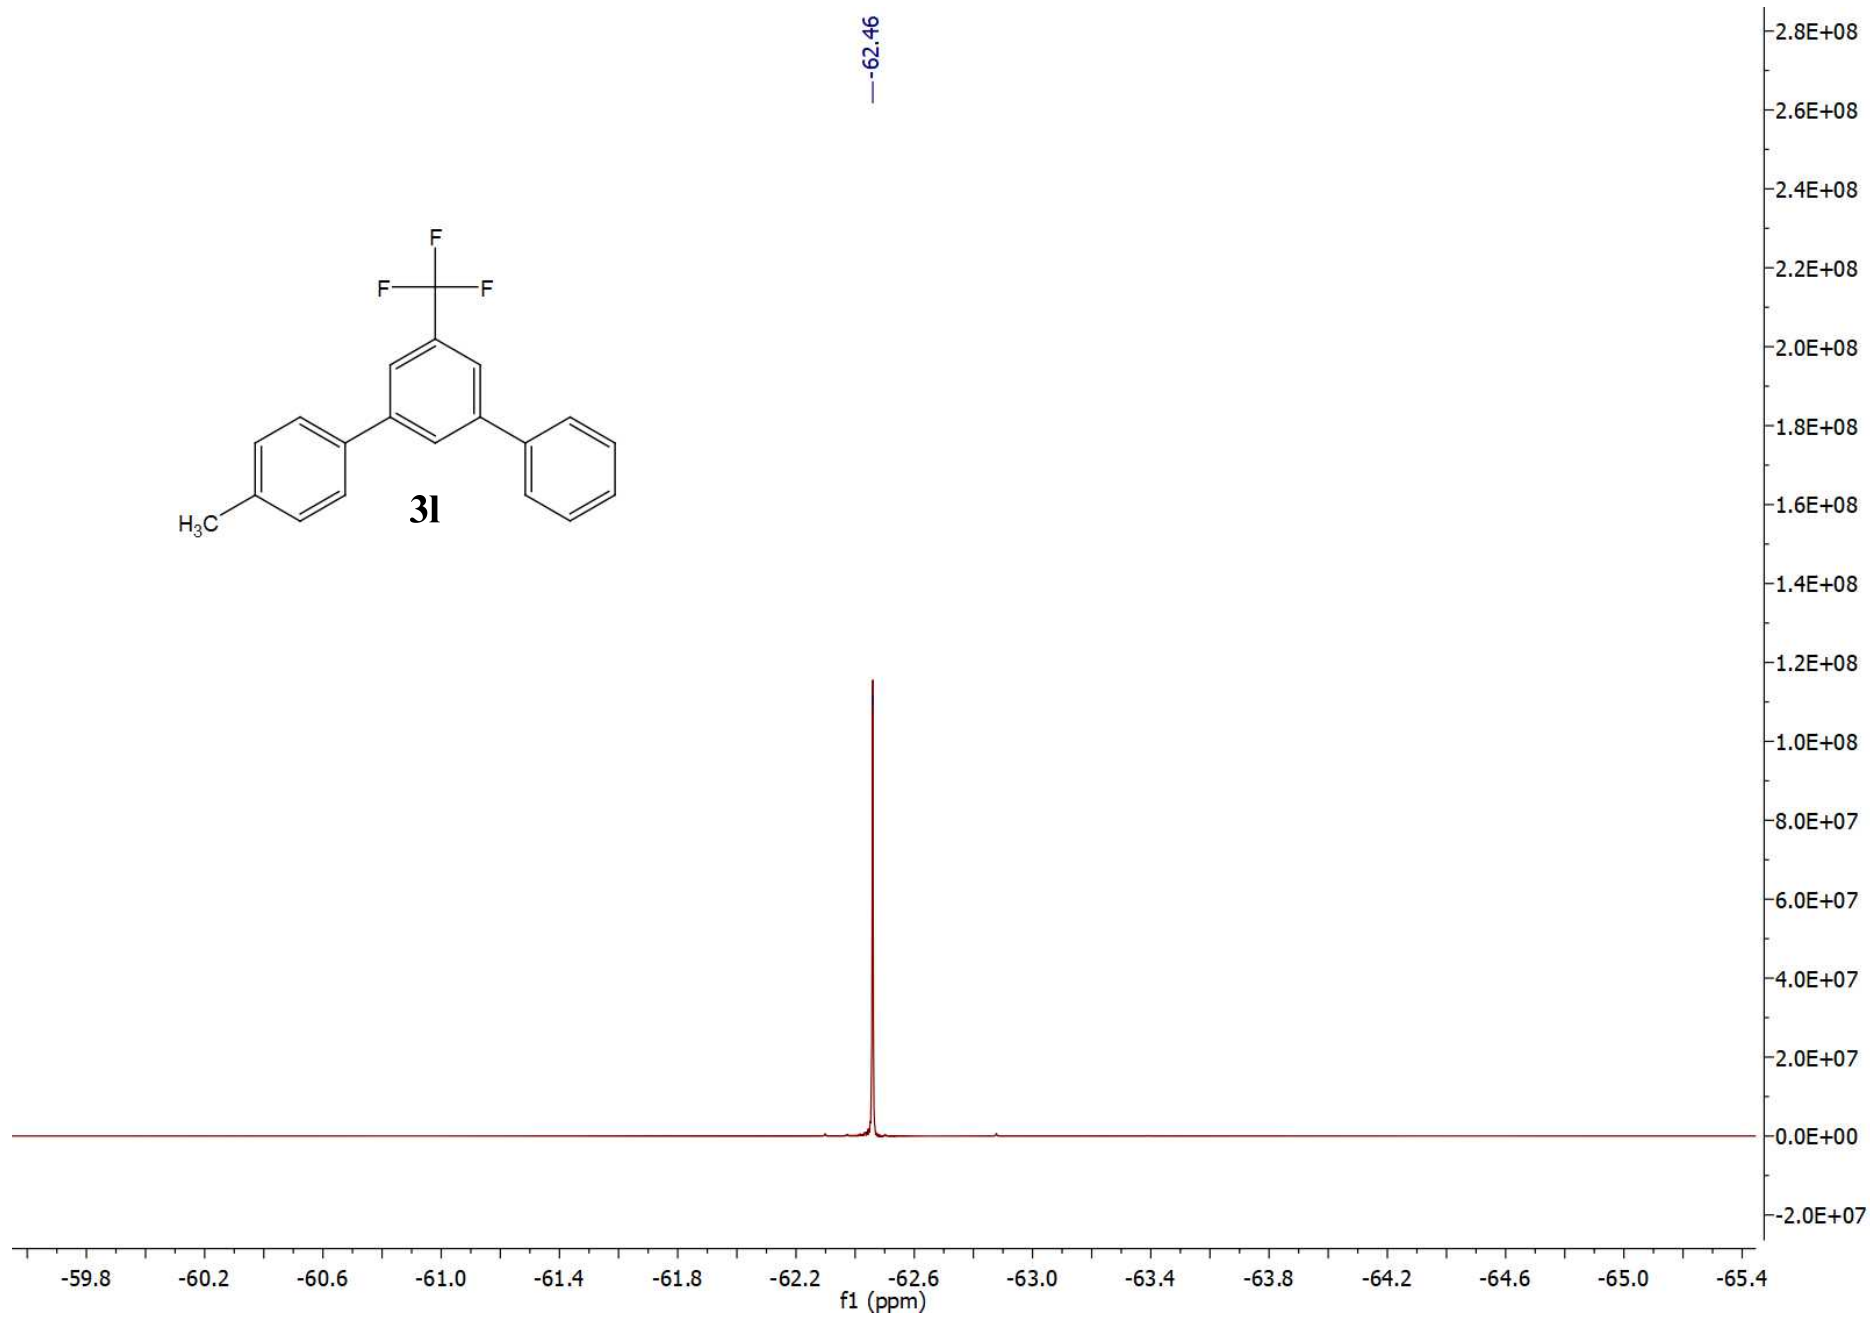

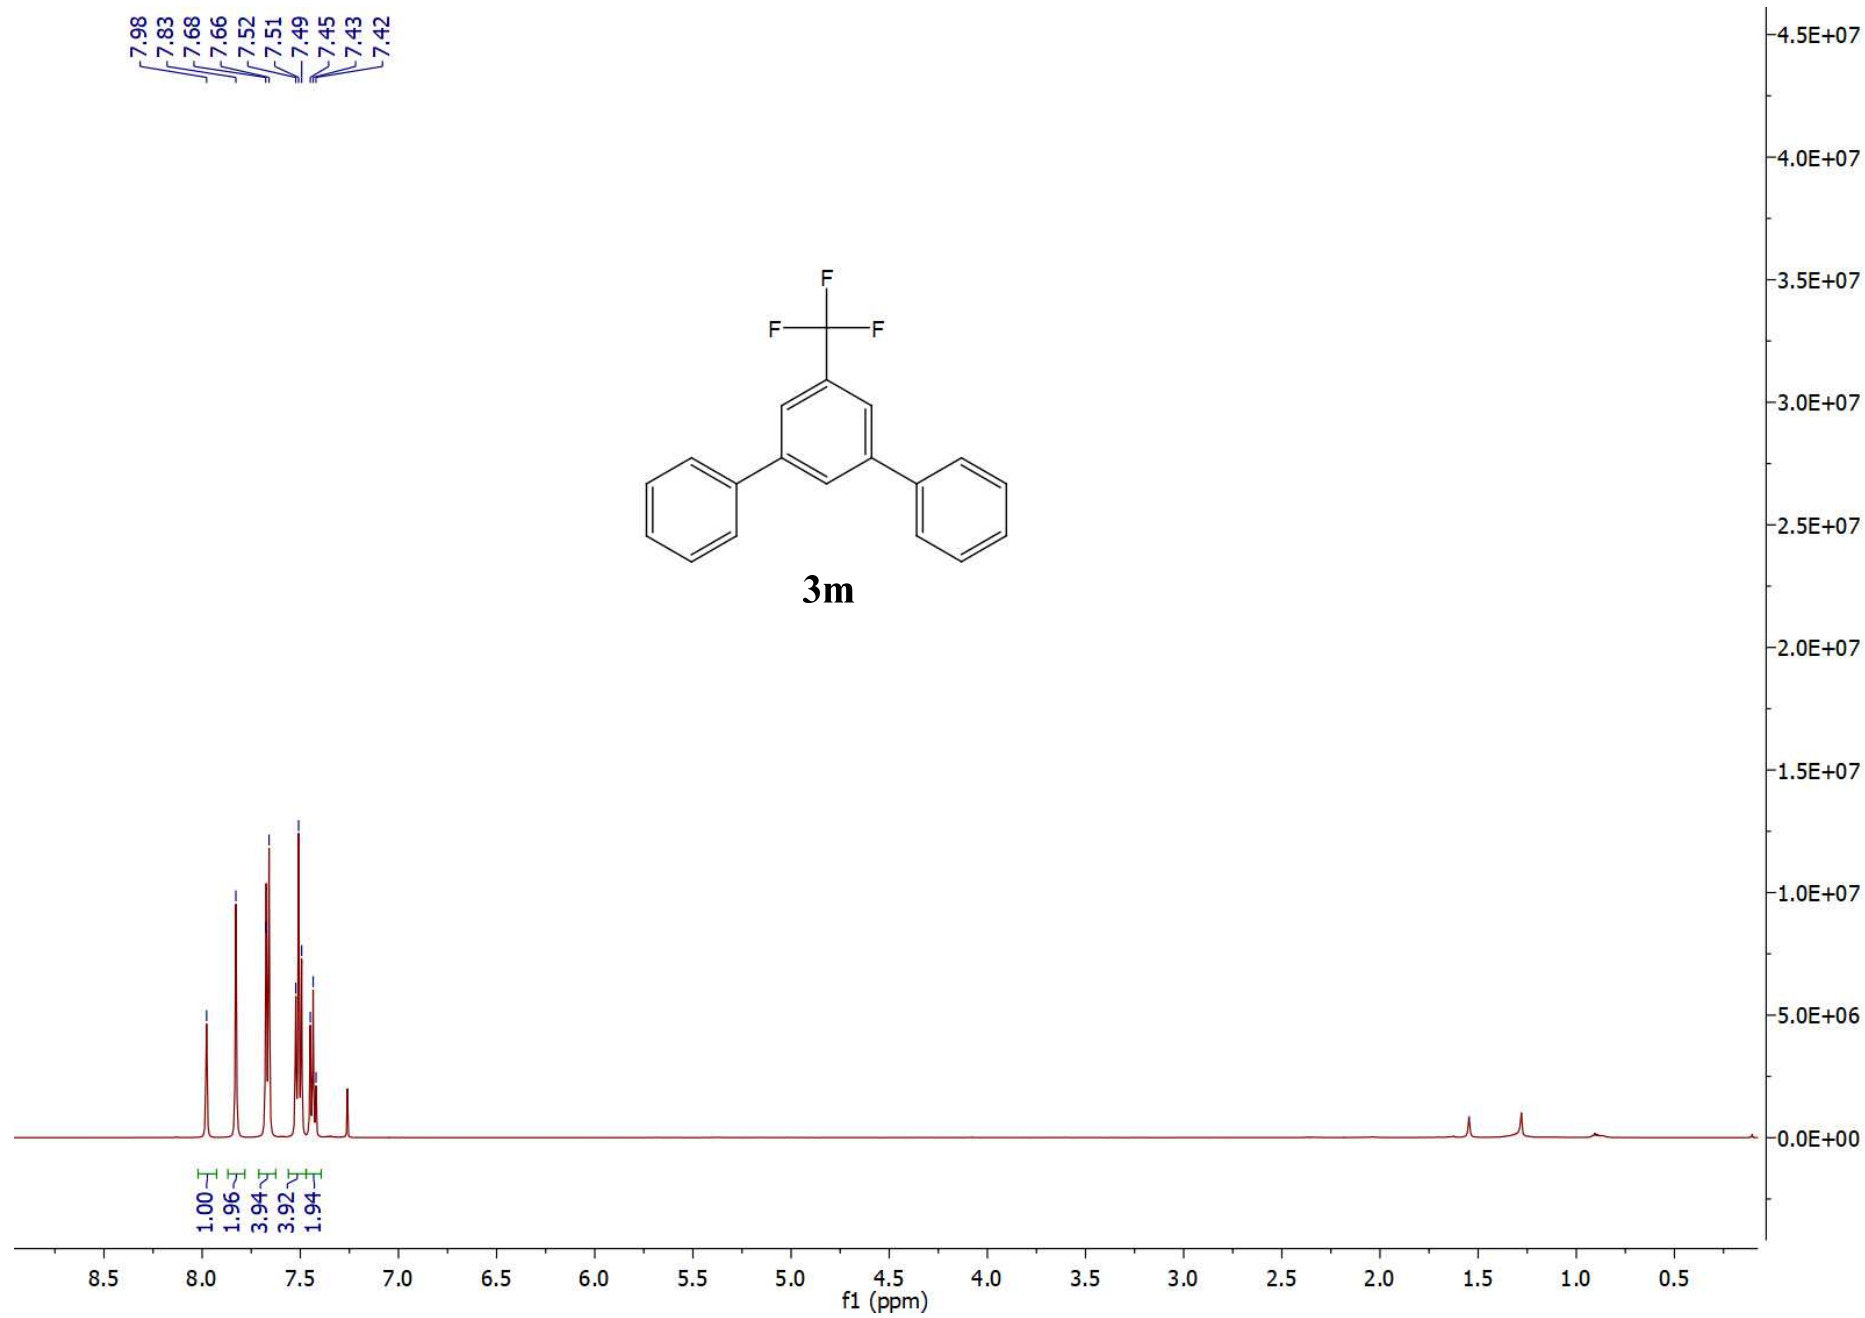

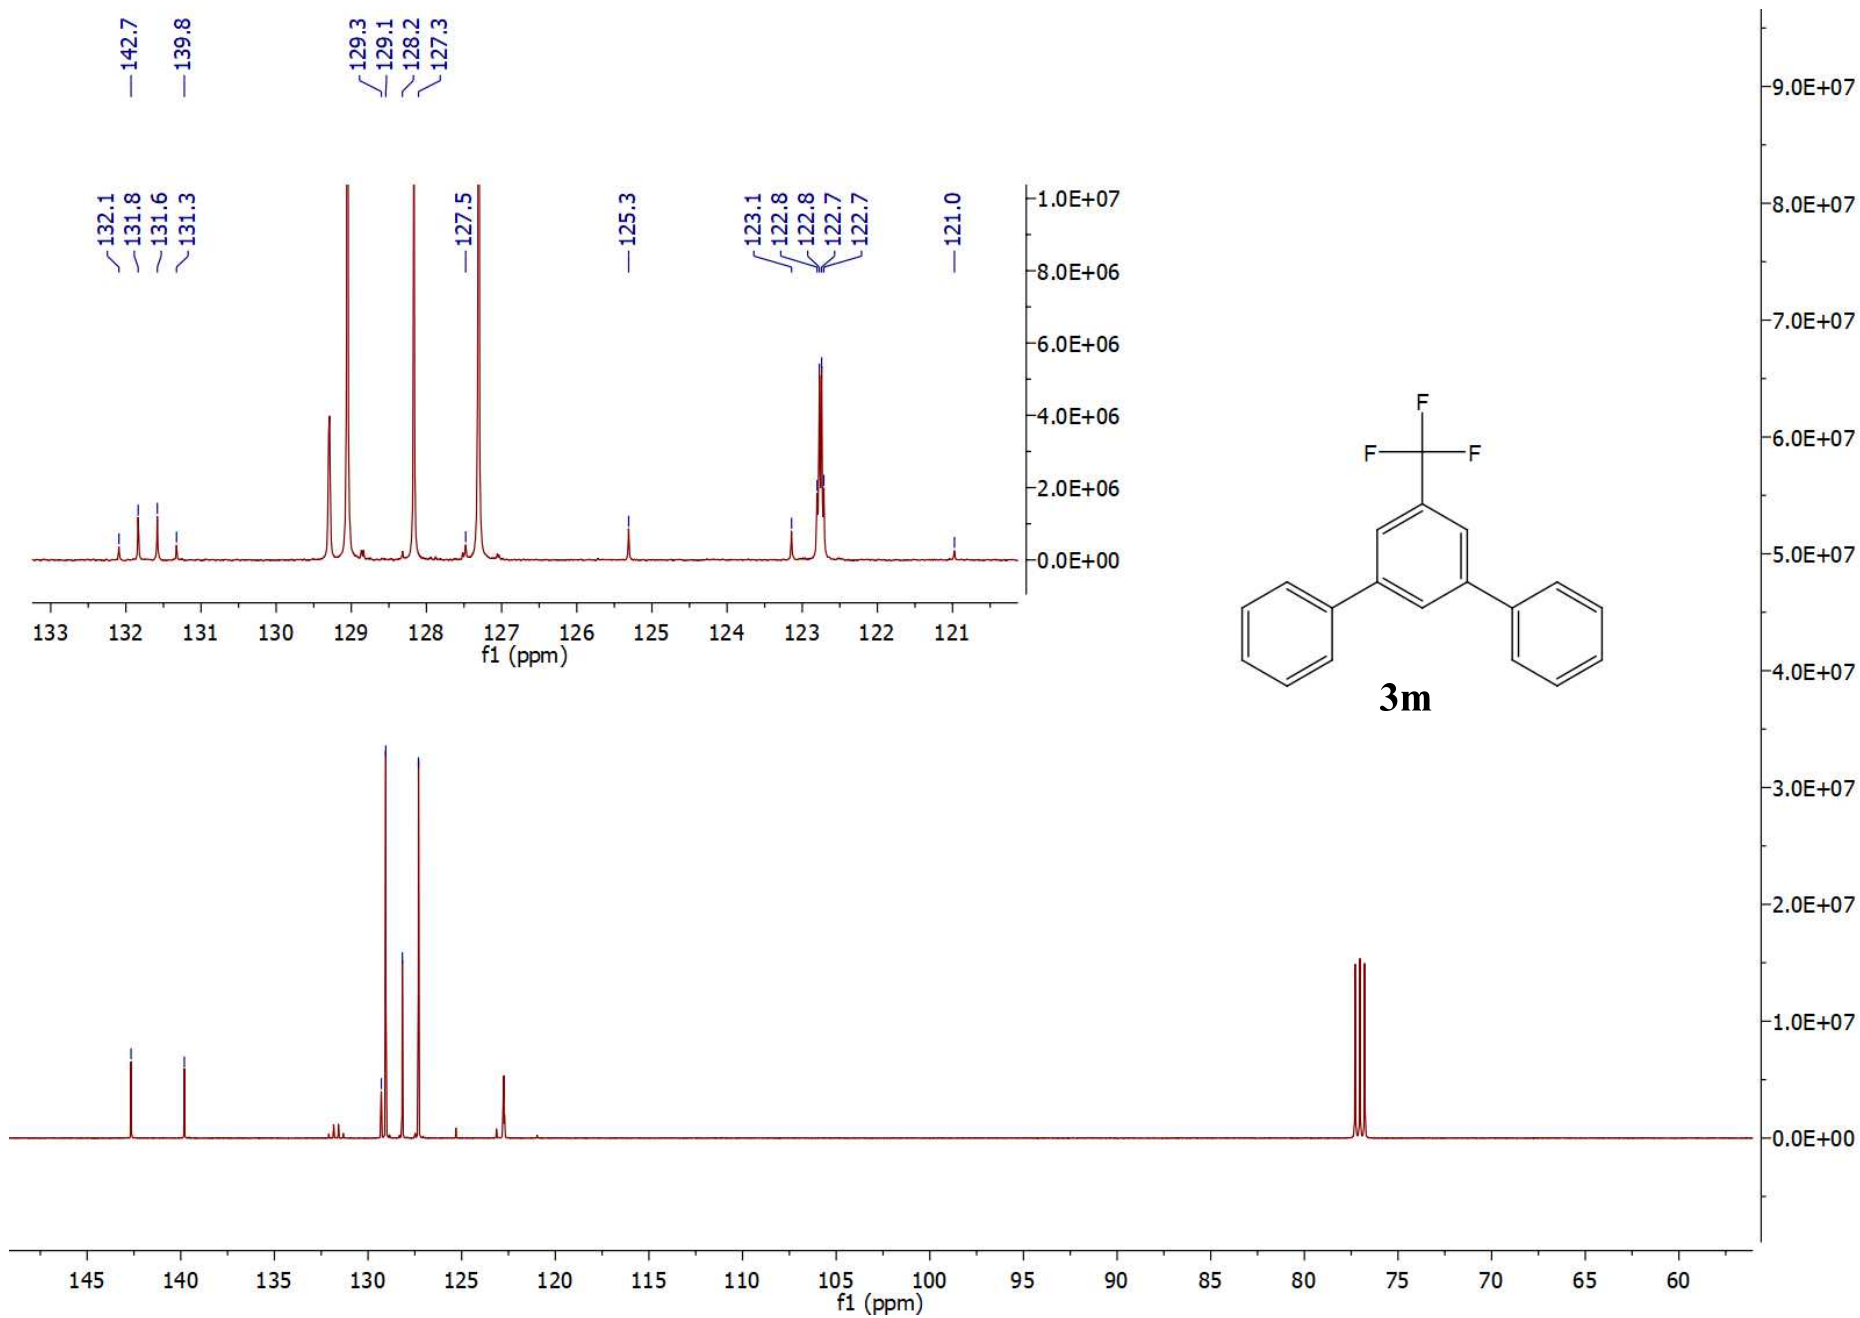

S97

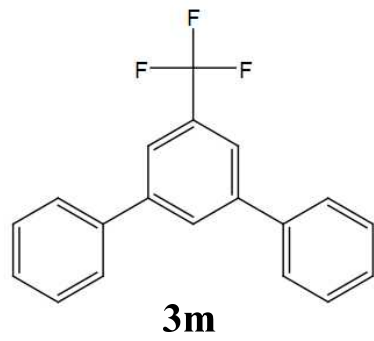

---62.46

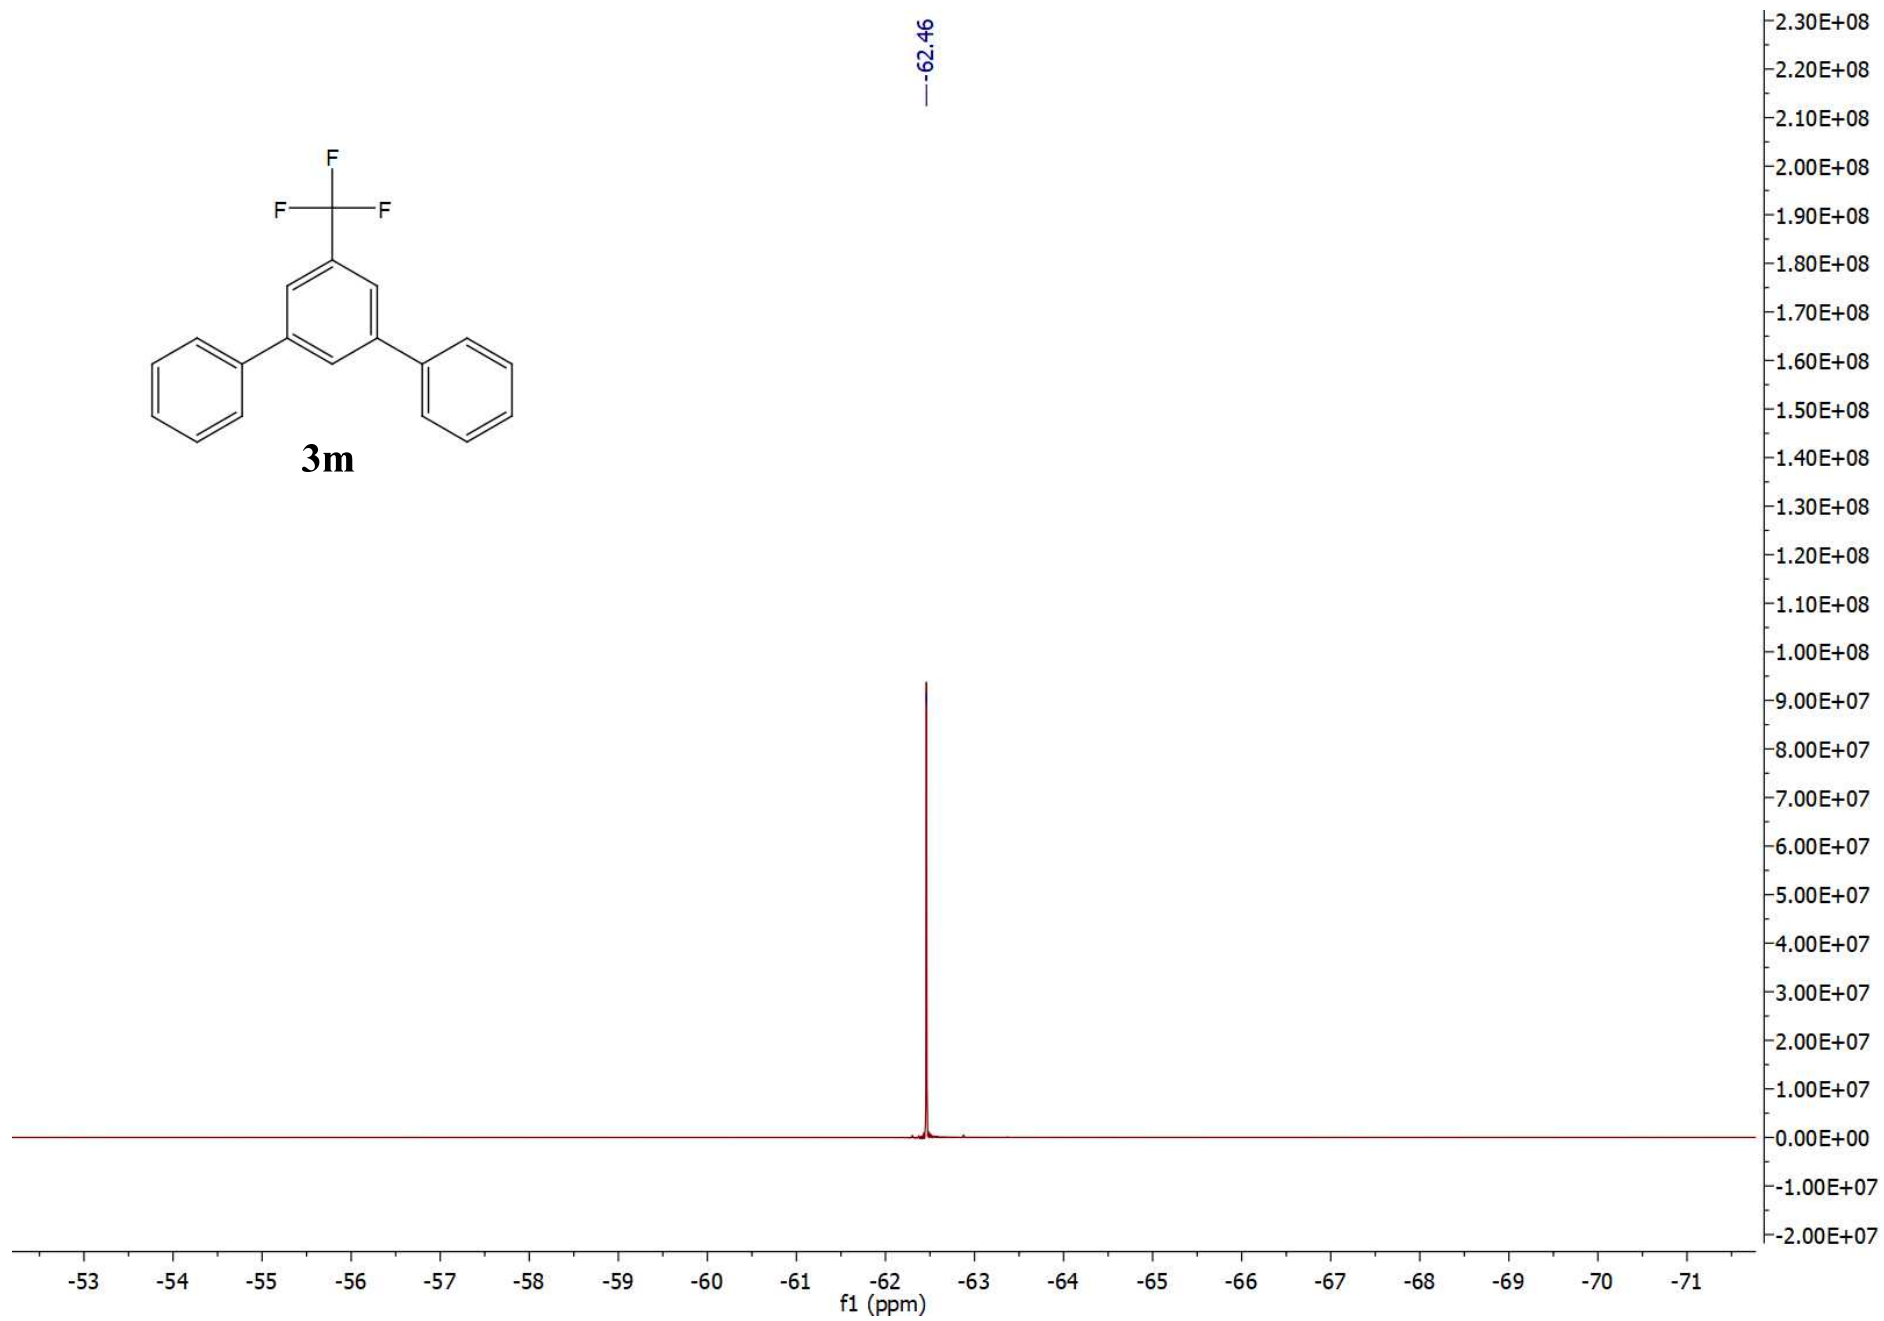

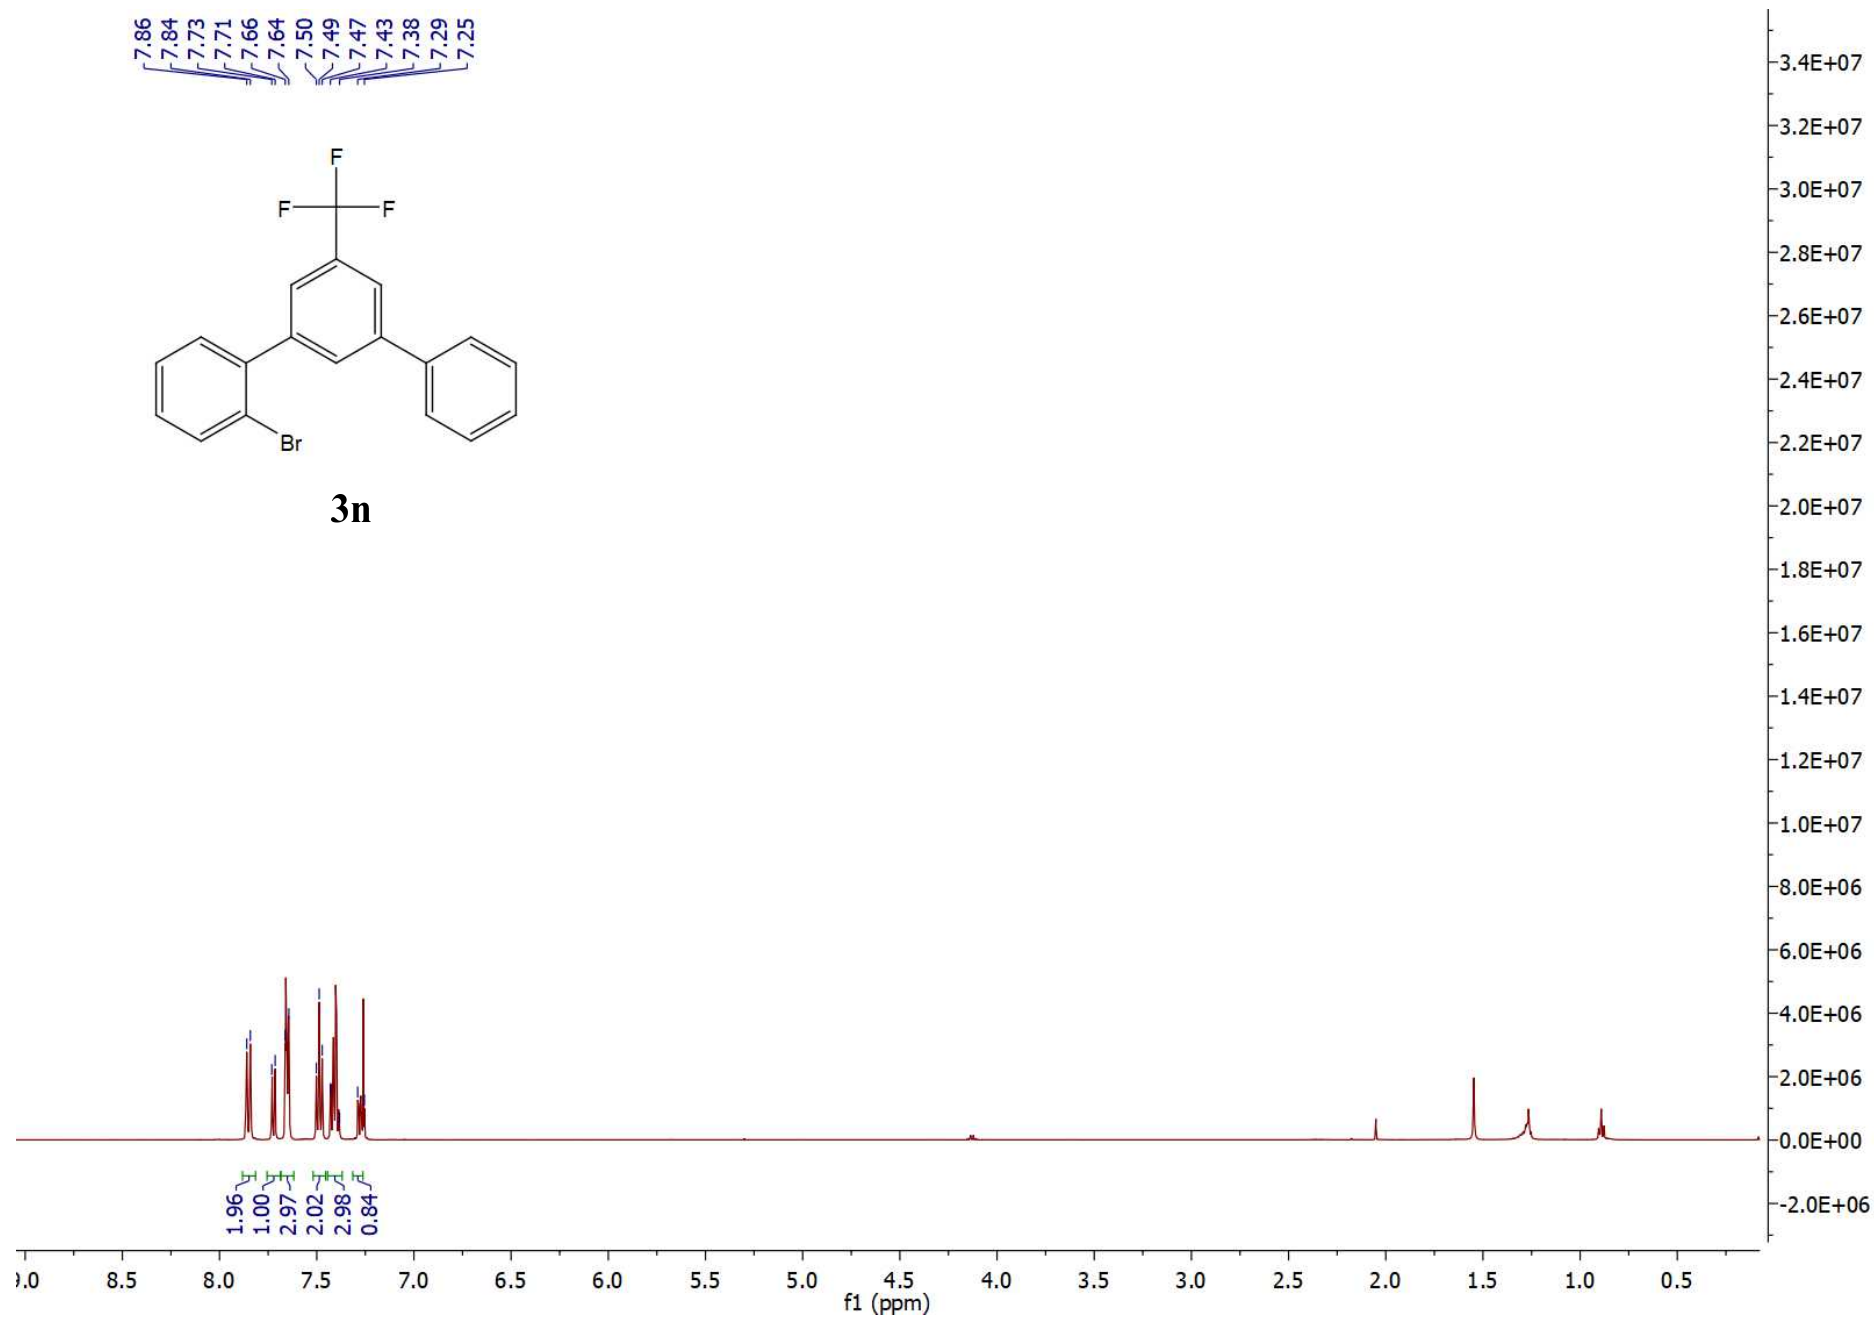

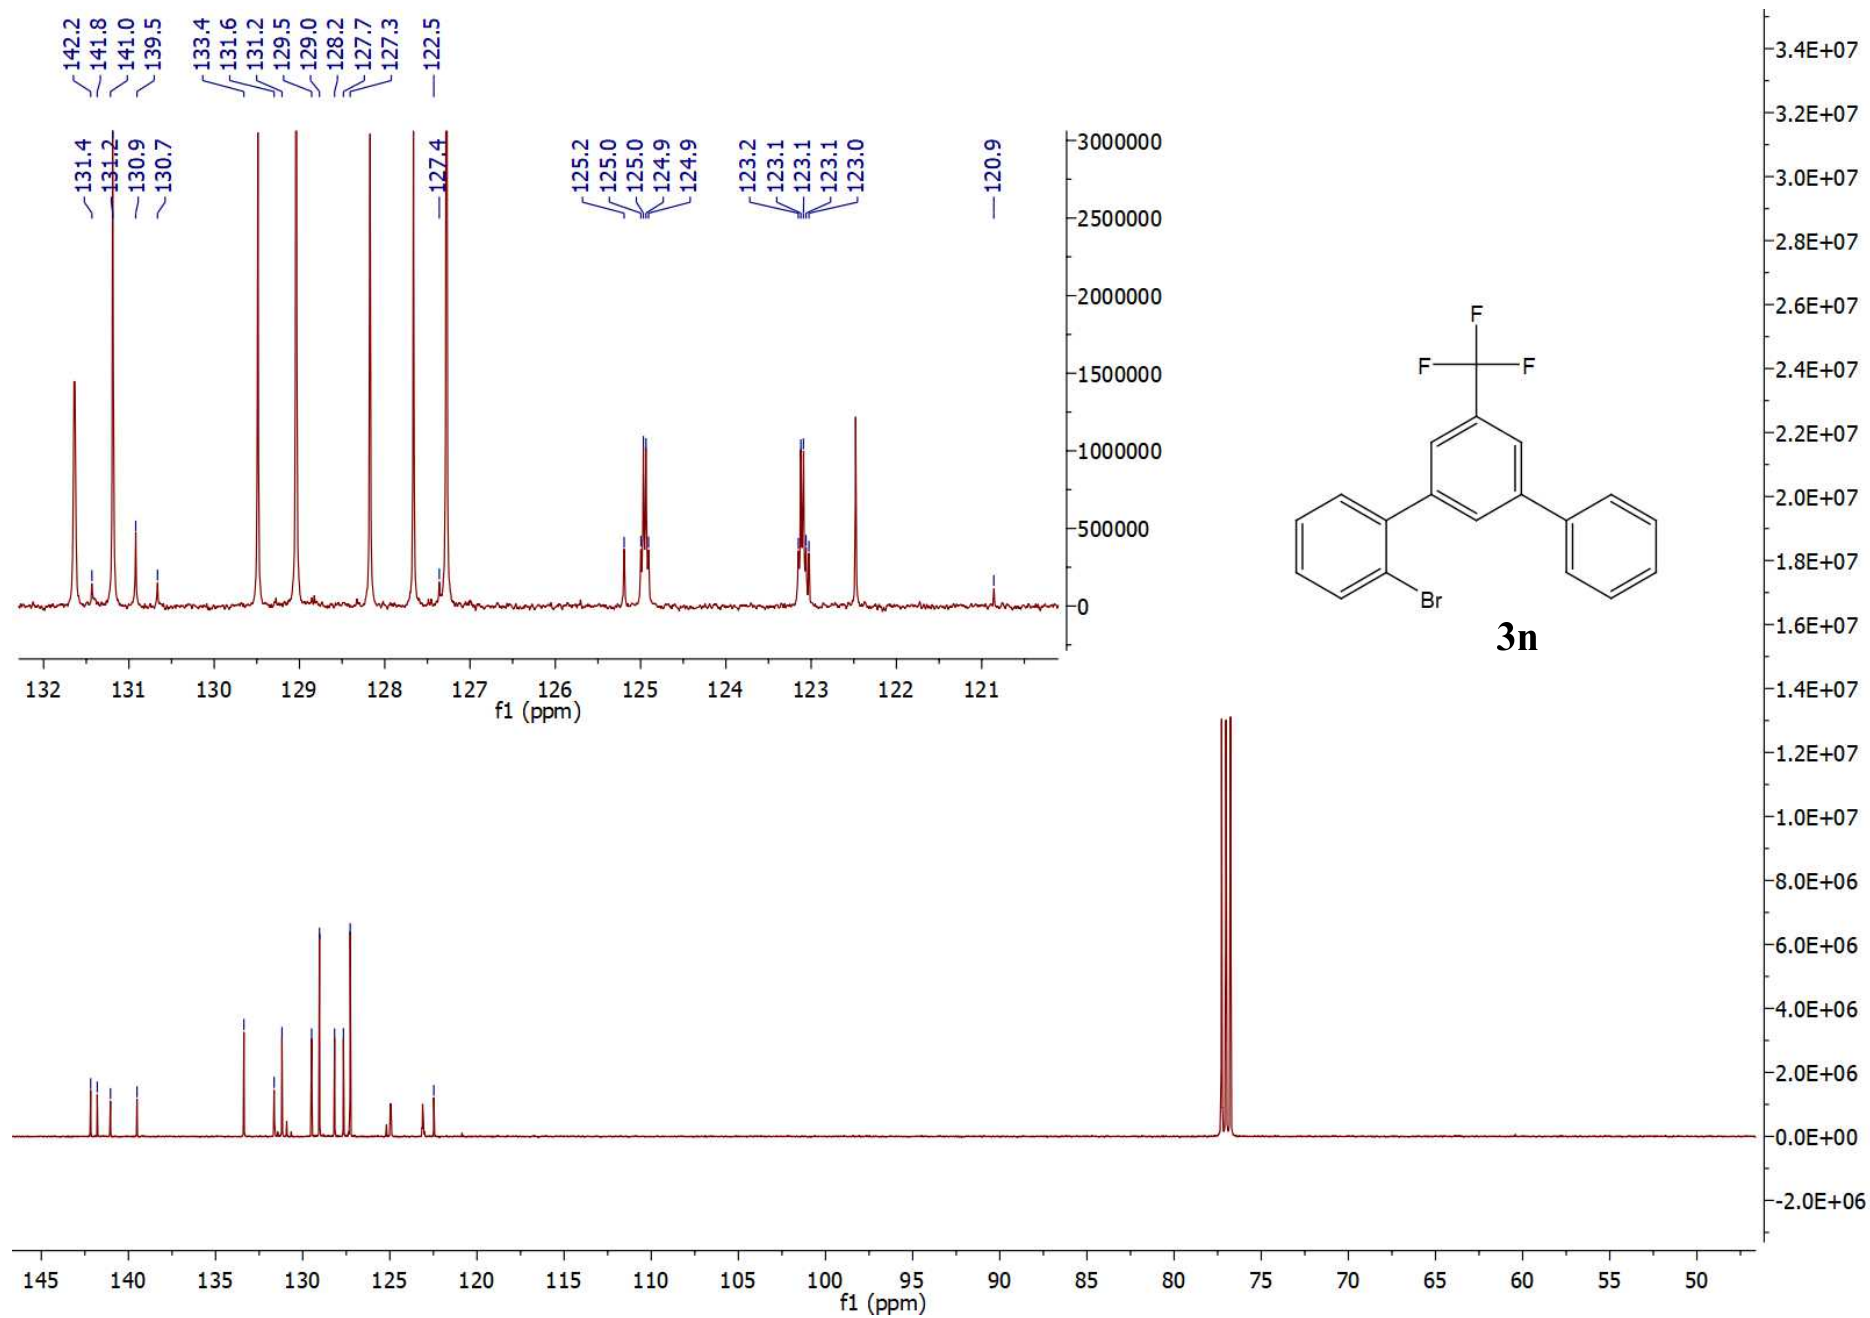

S100

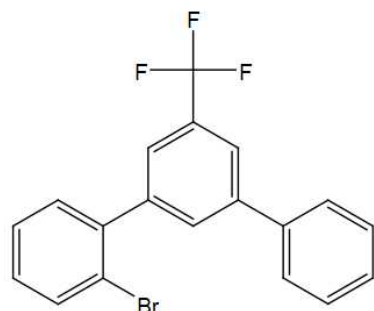

**3n**

-62.44

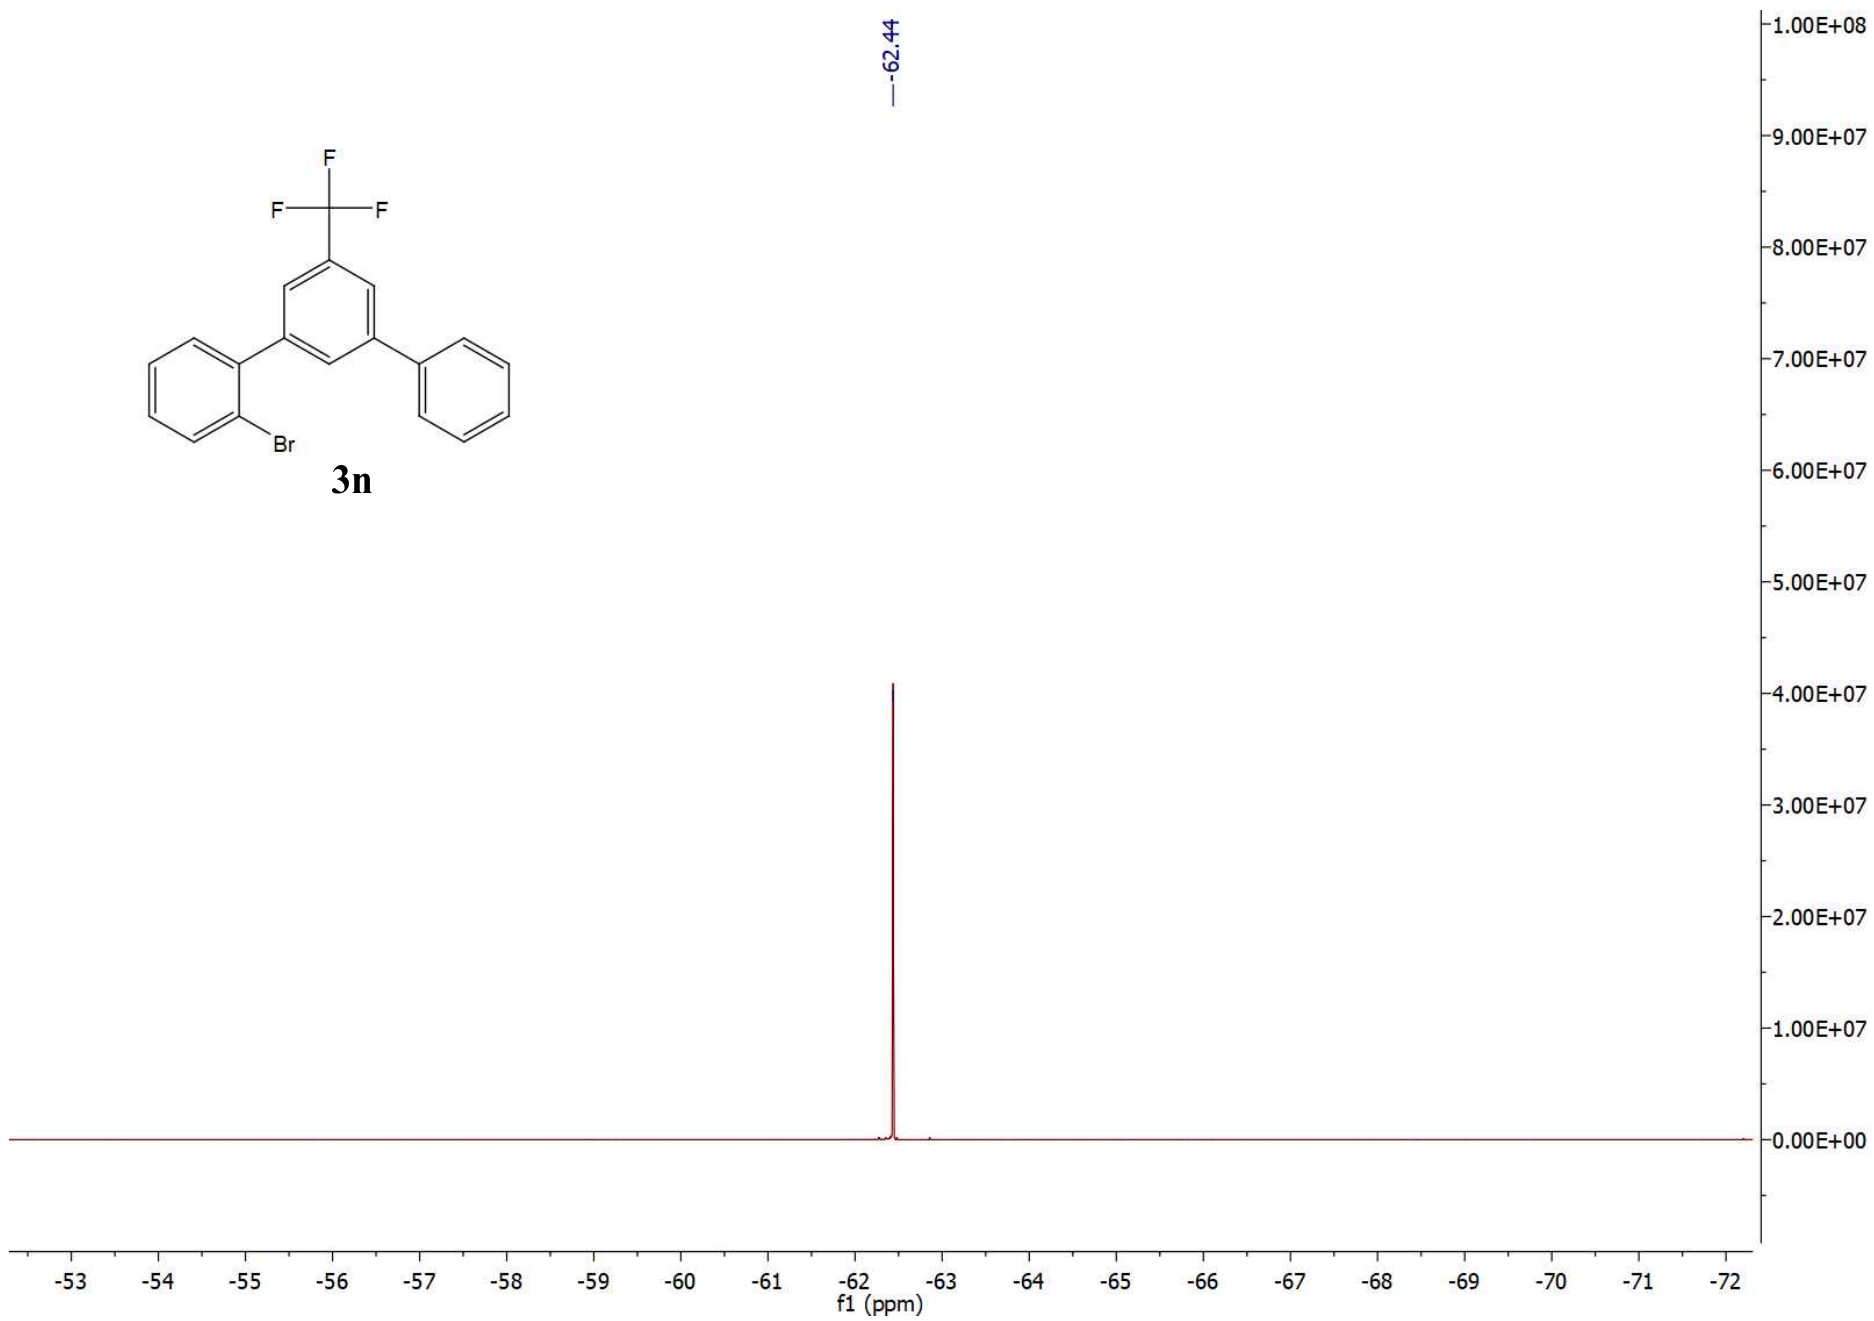



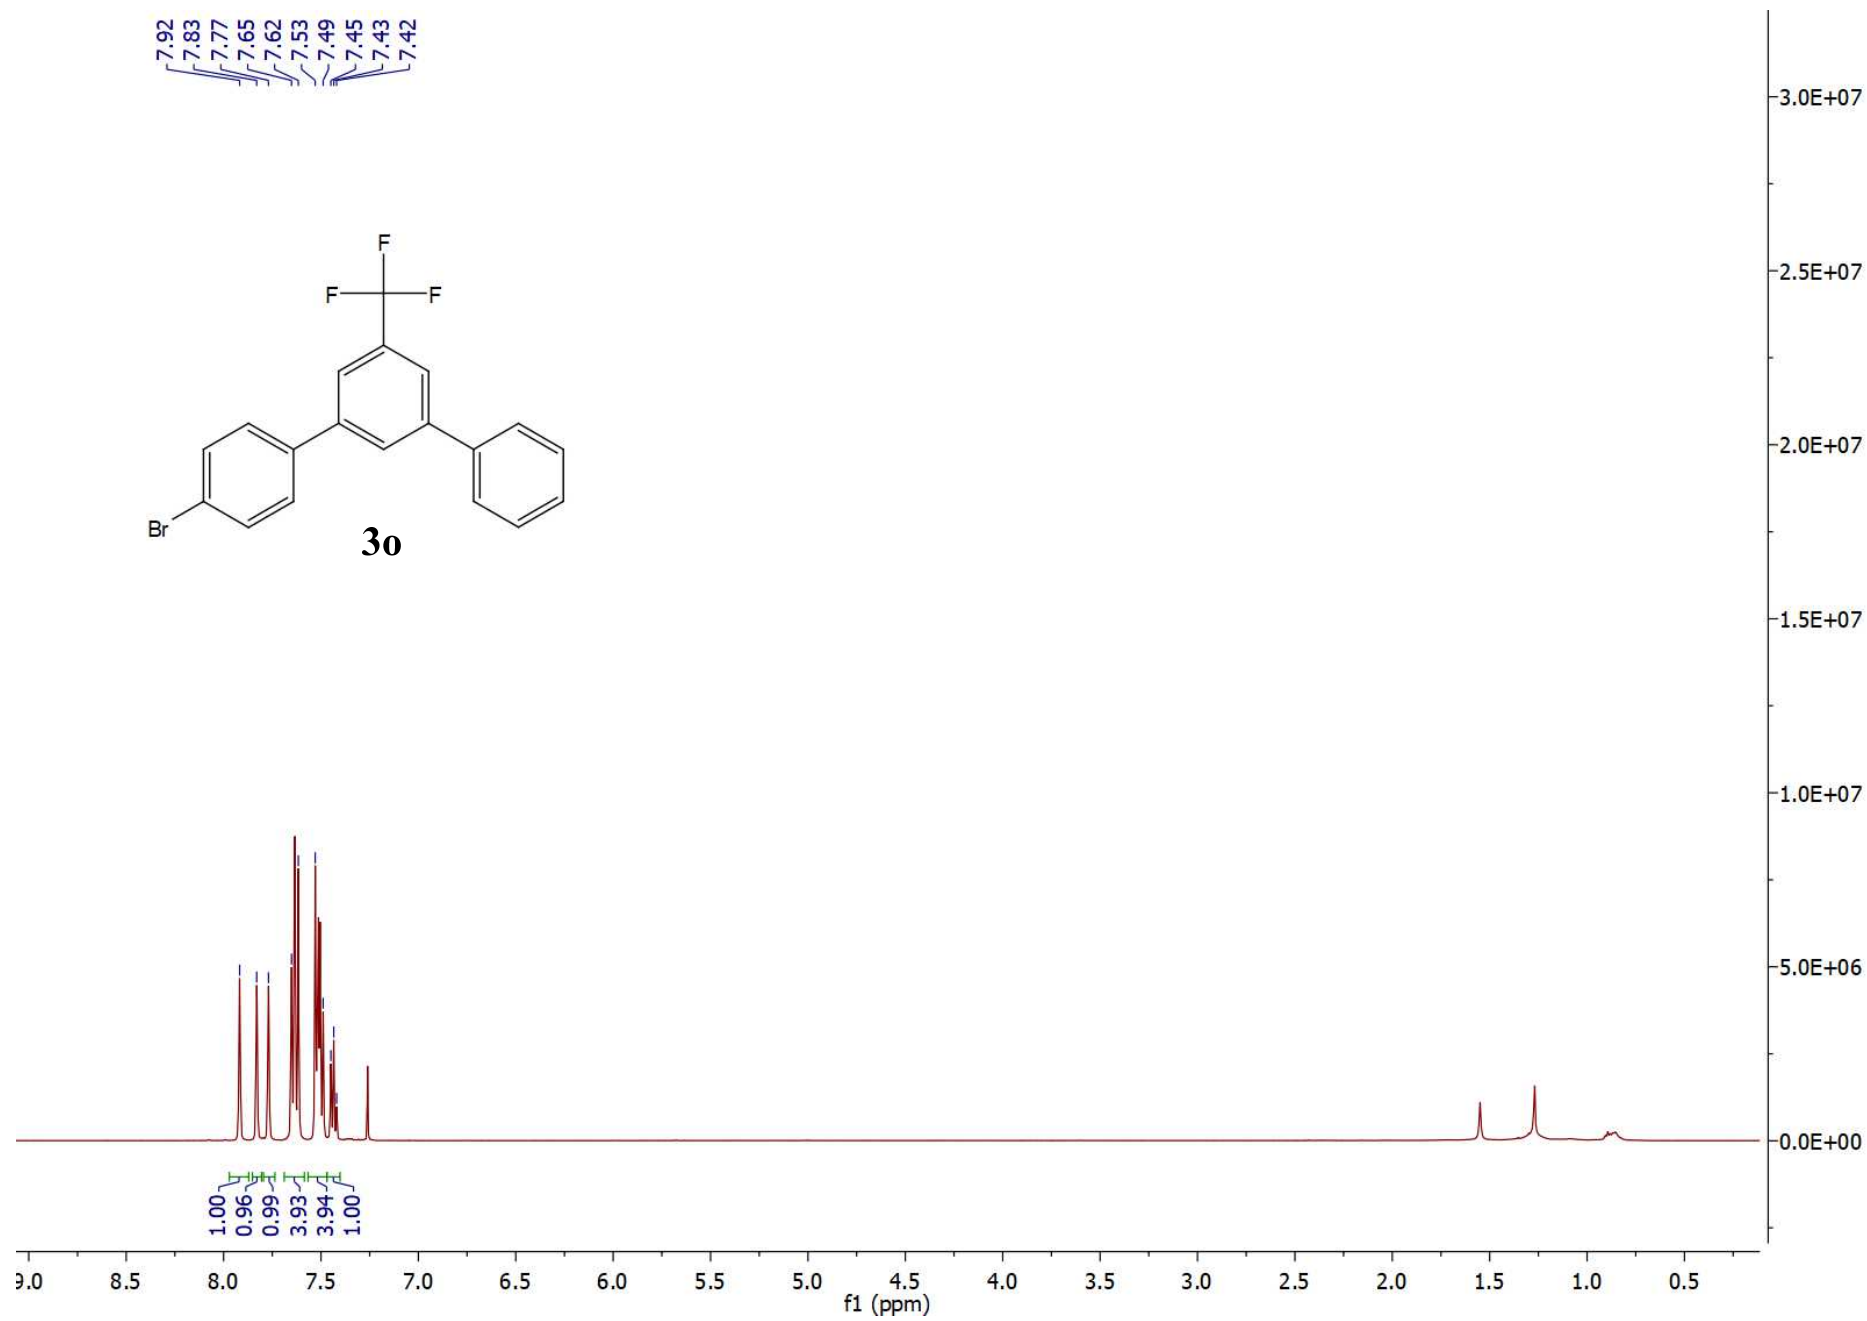

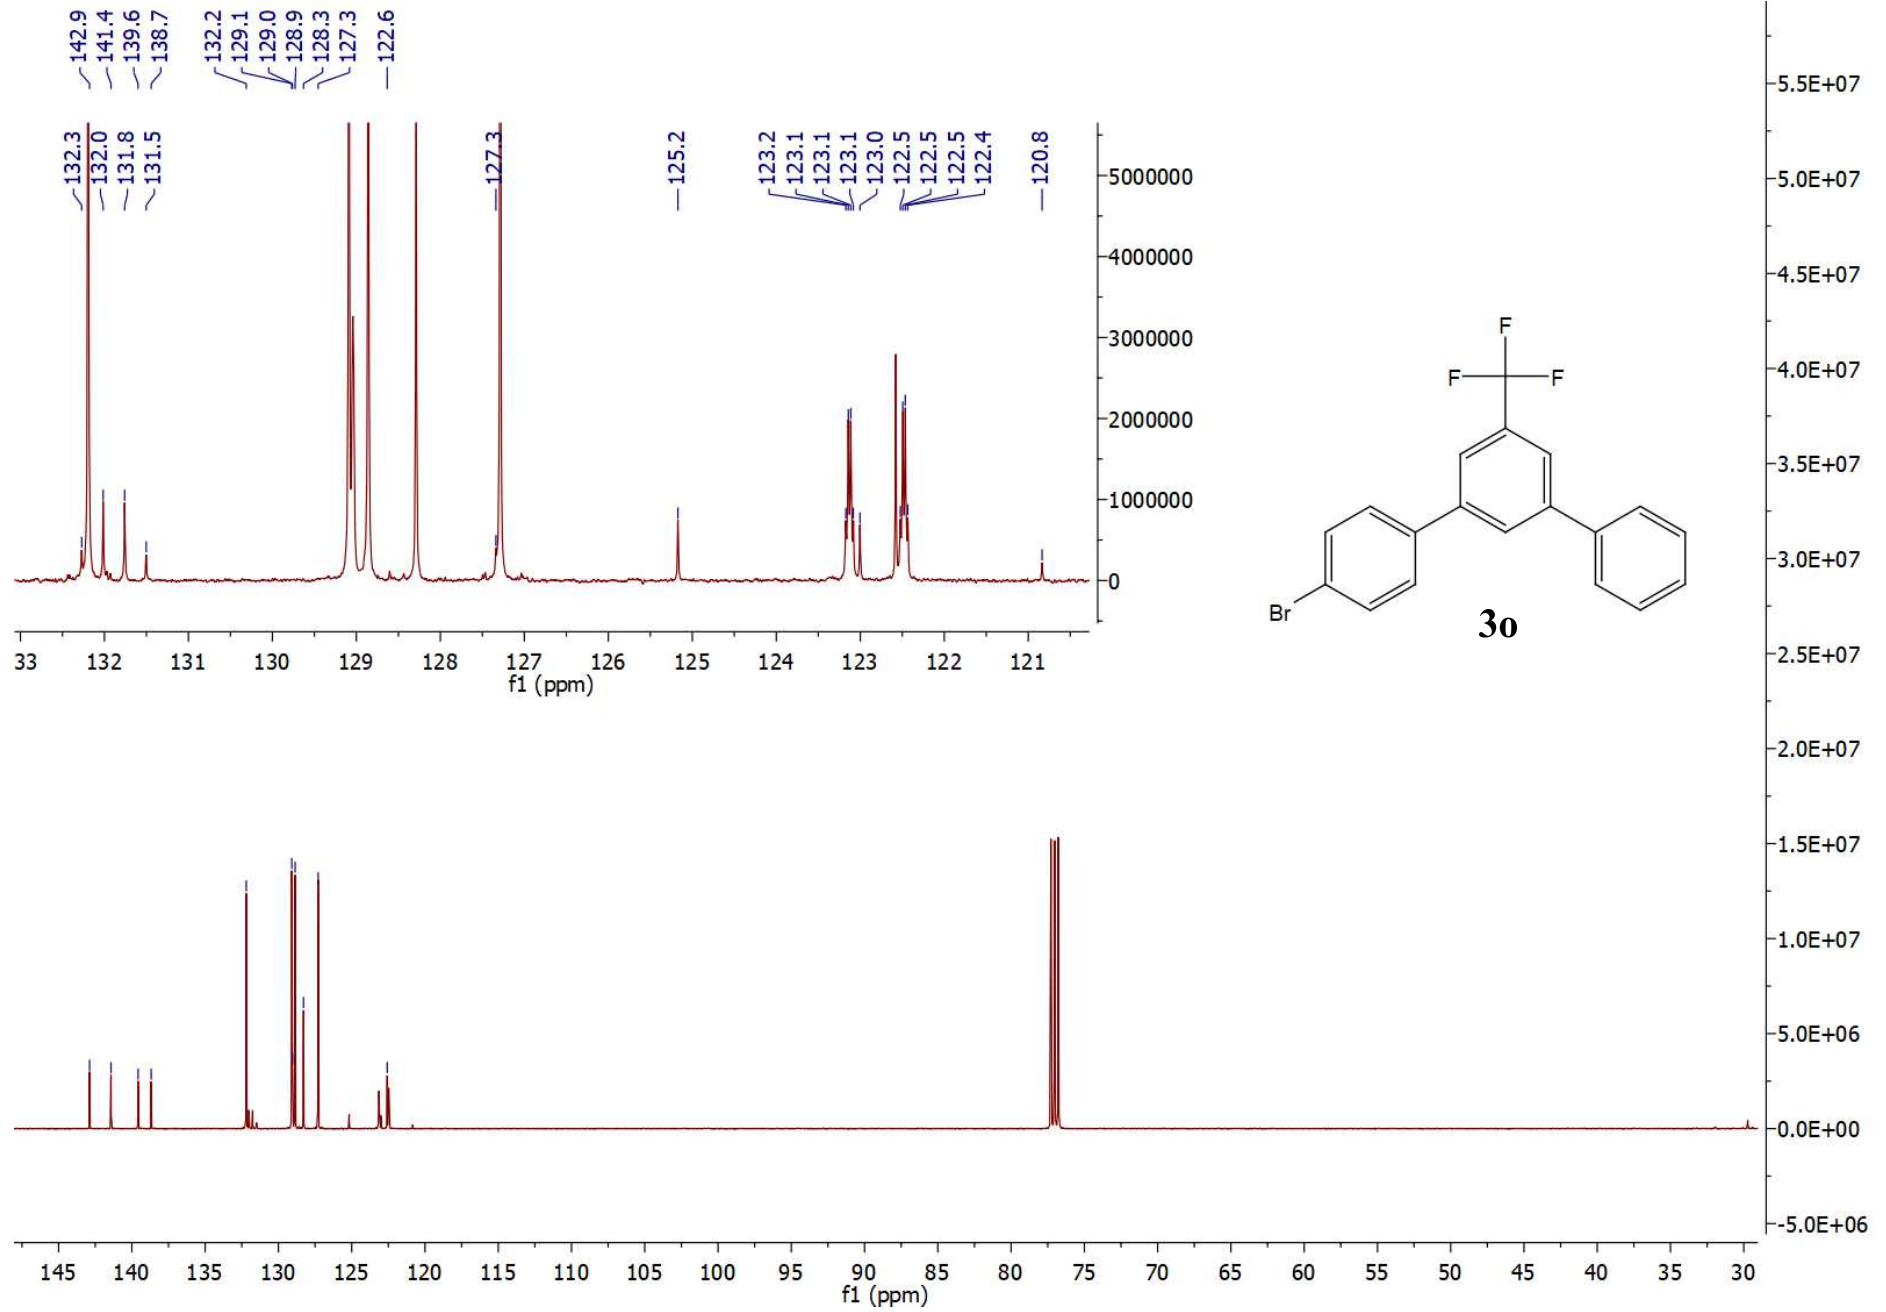

S103

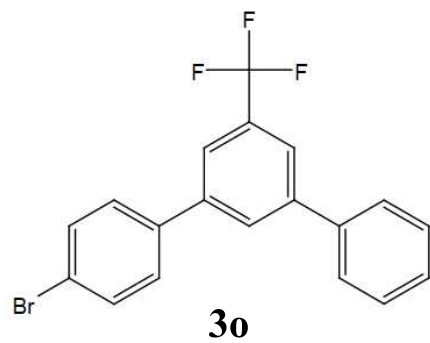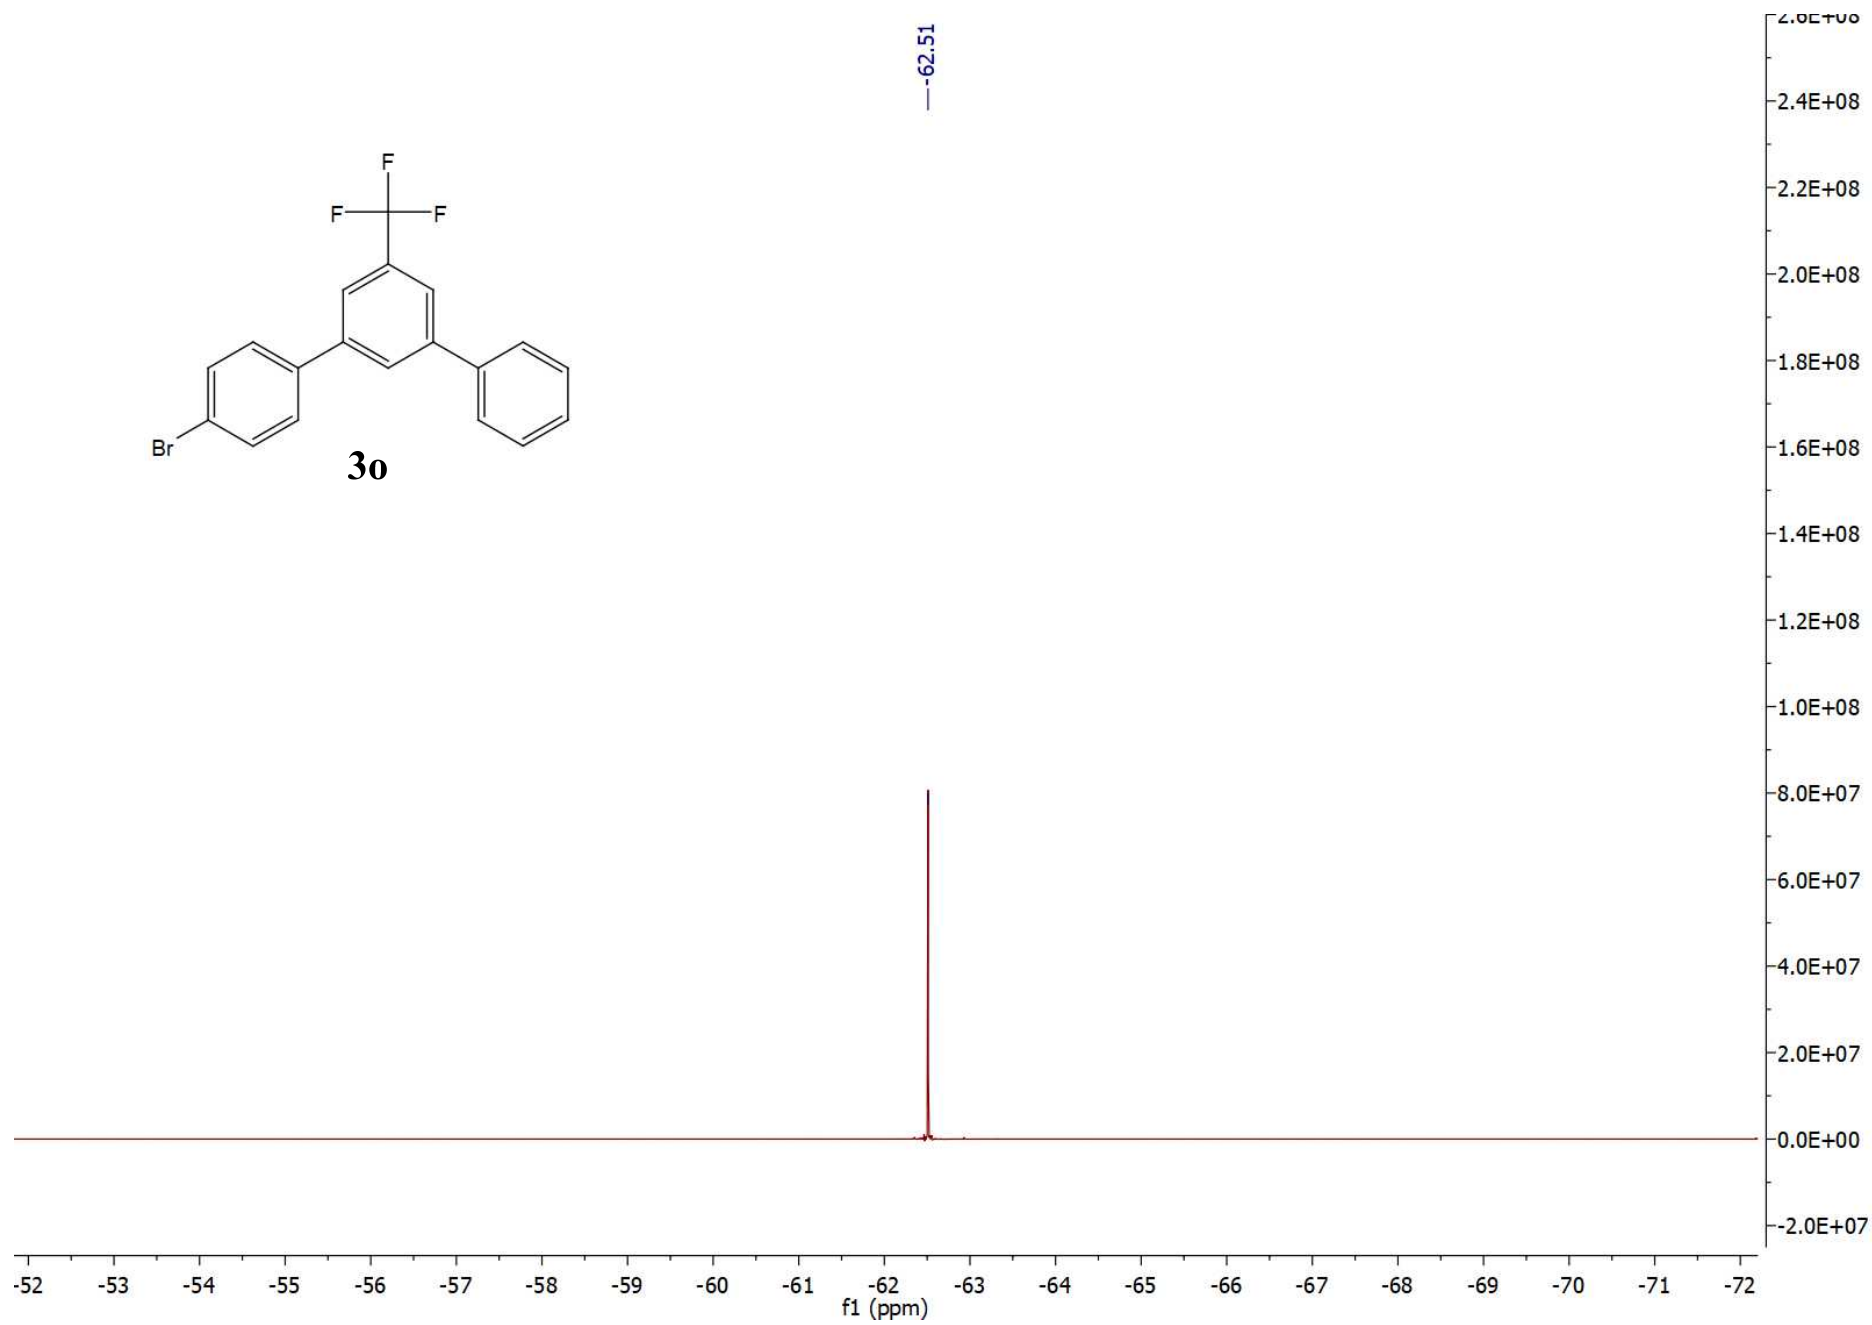

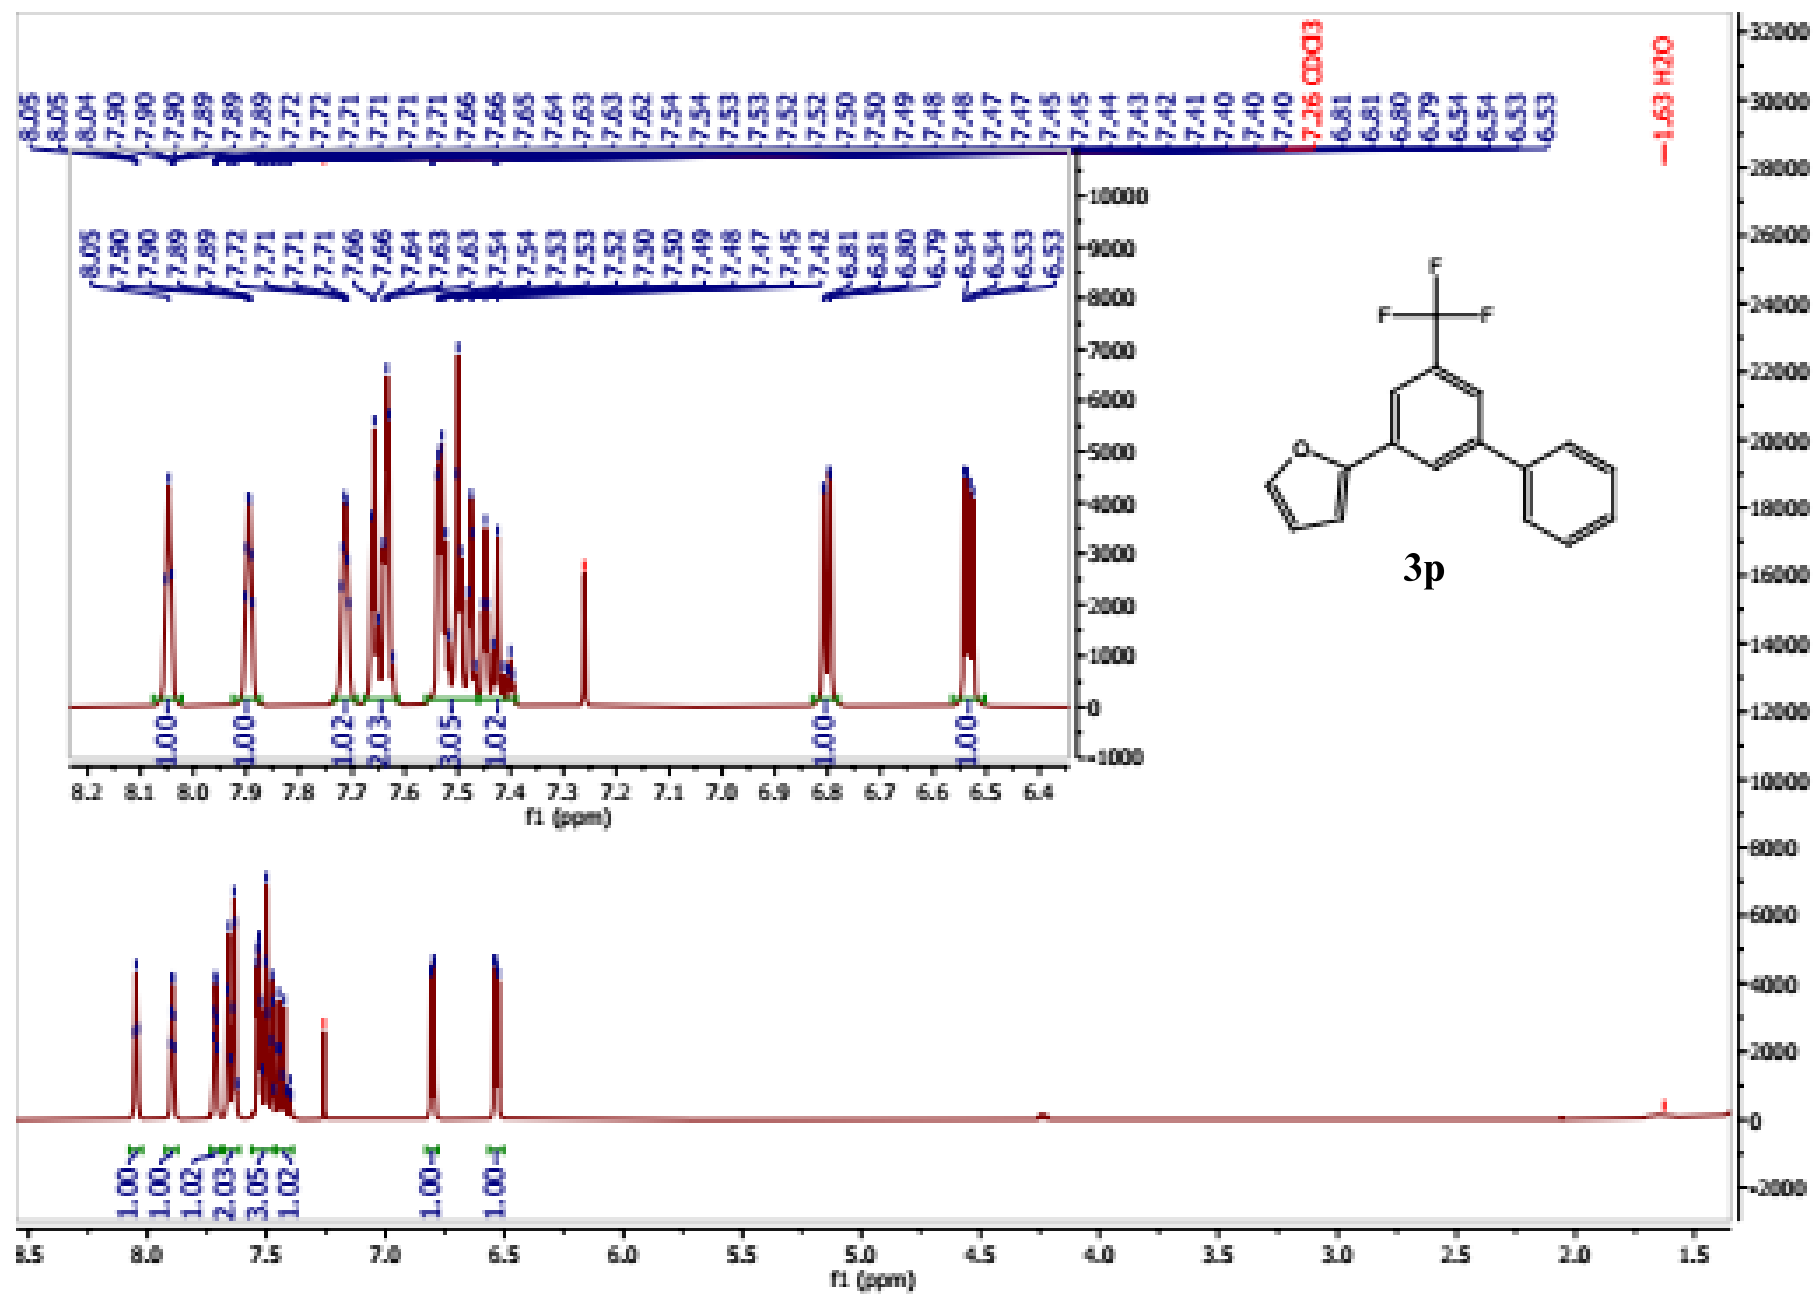

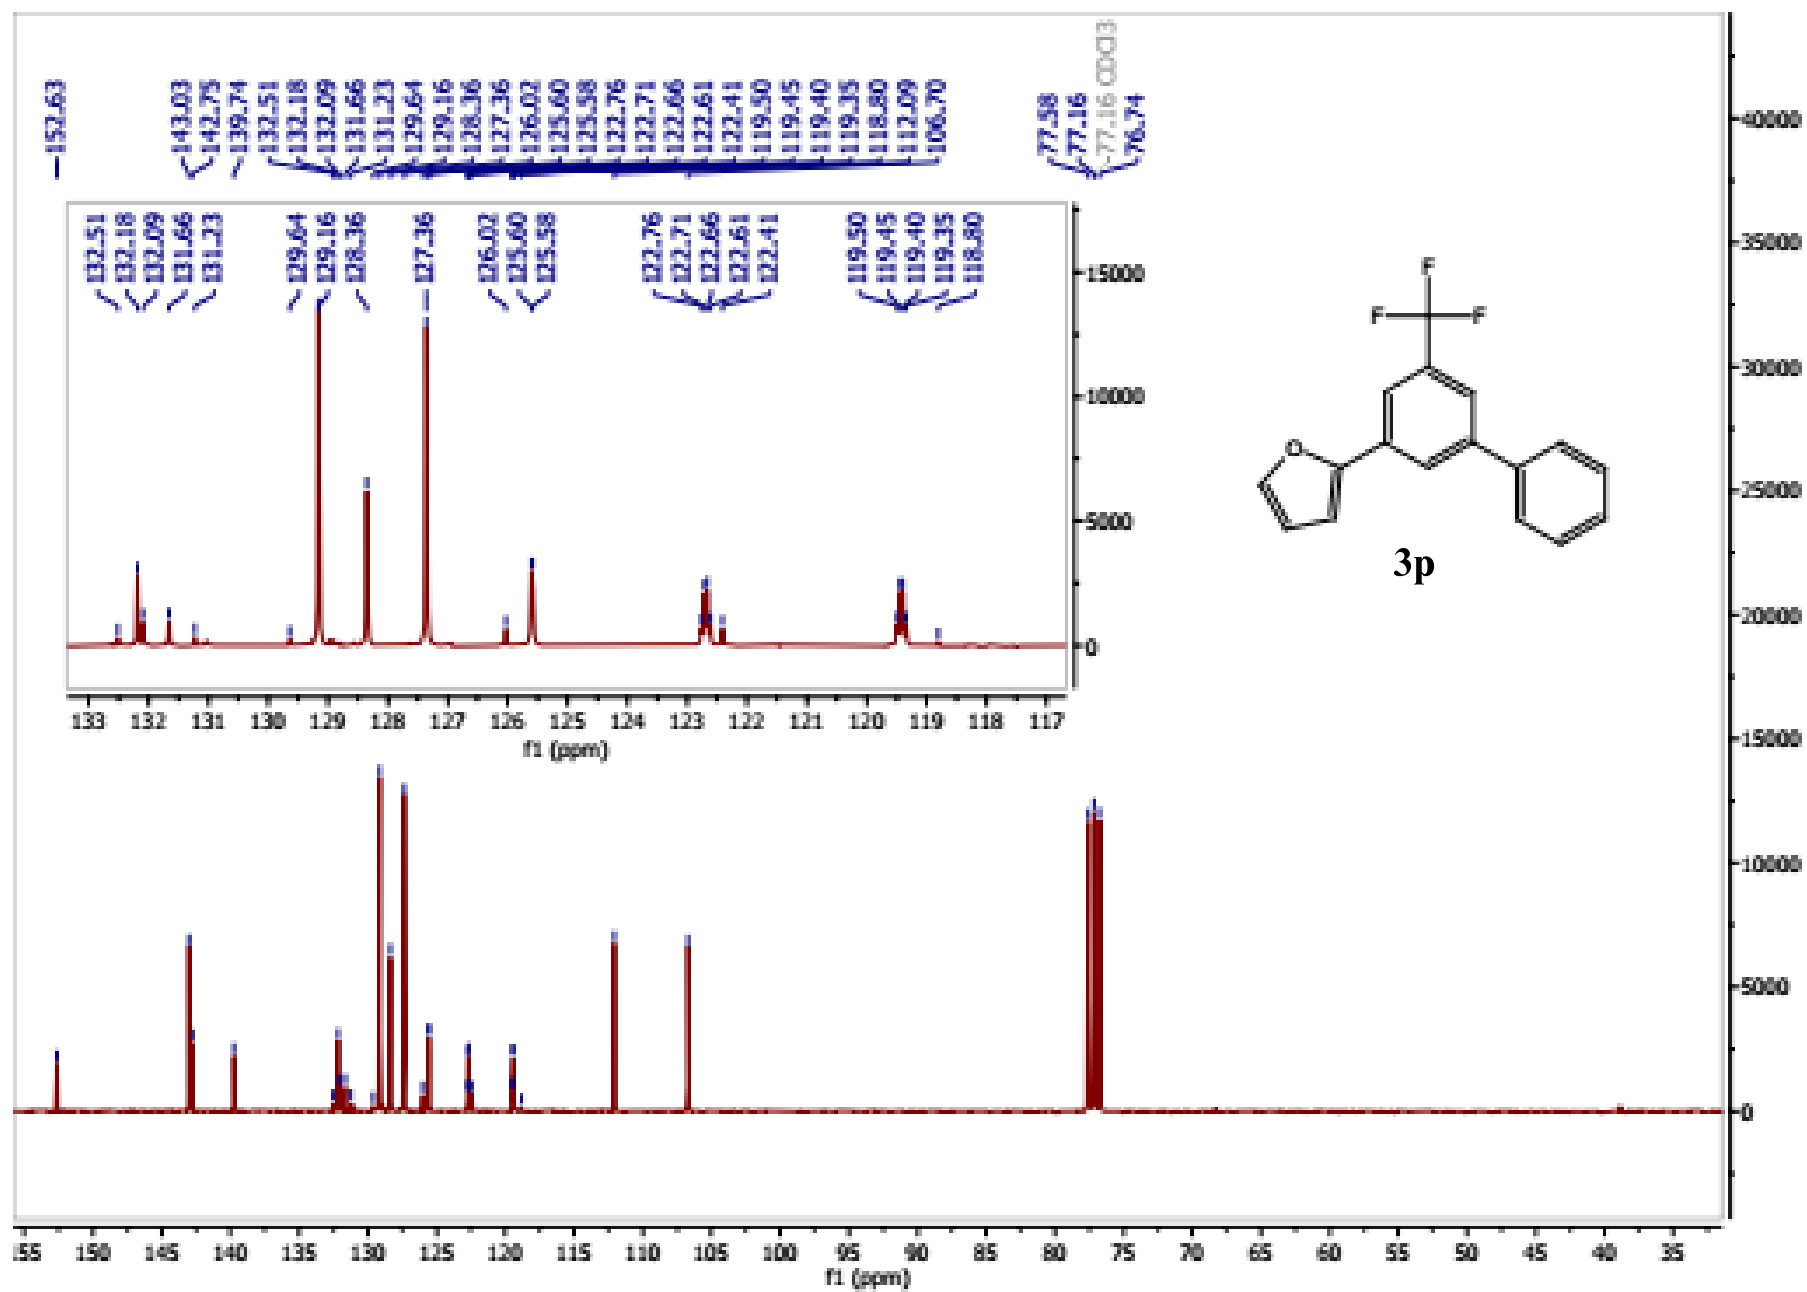

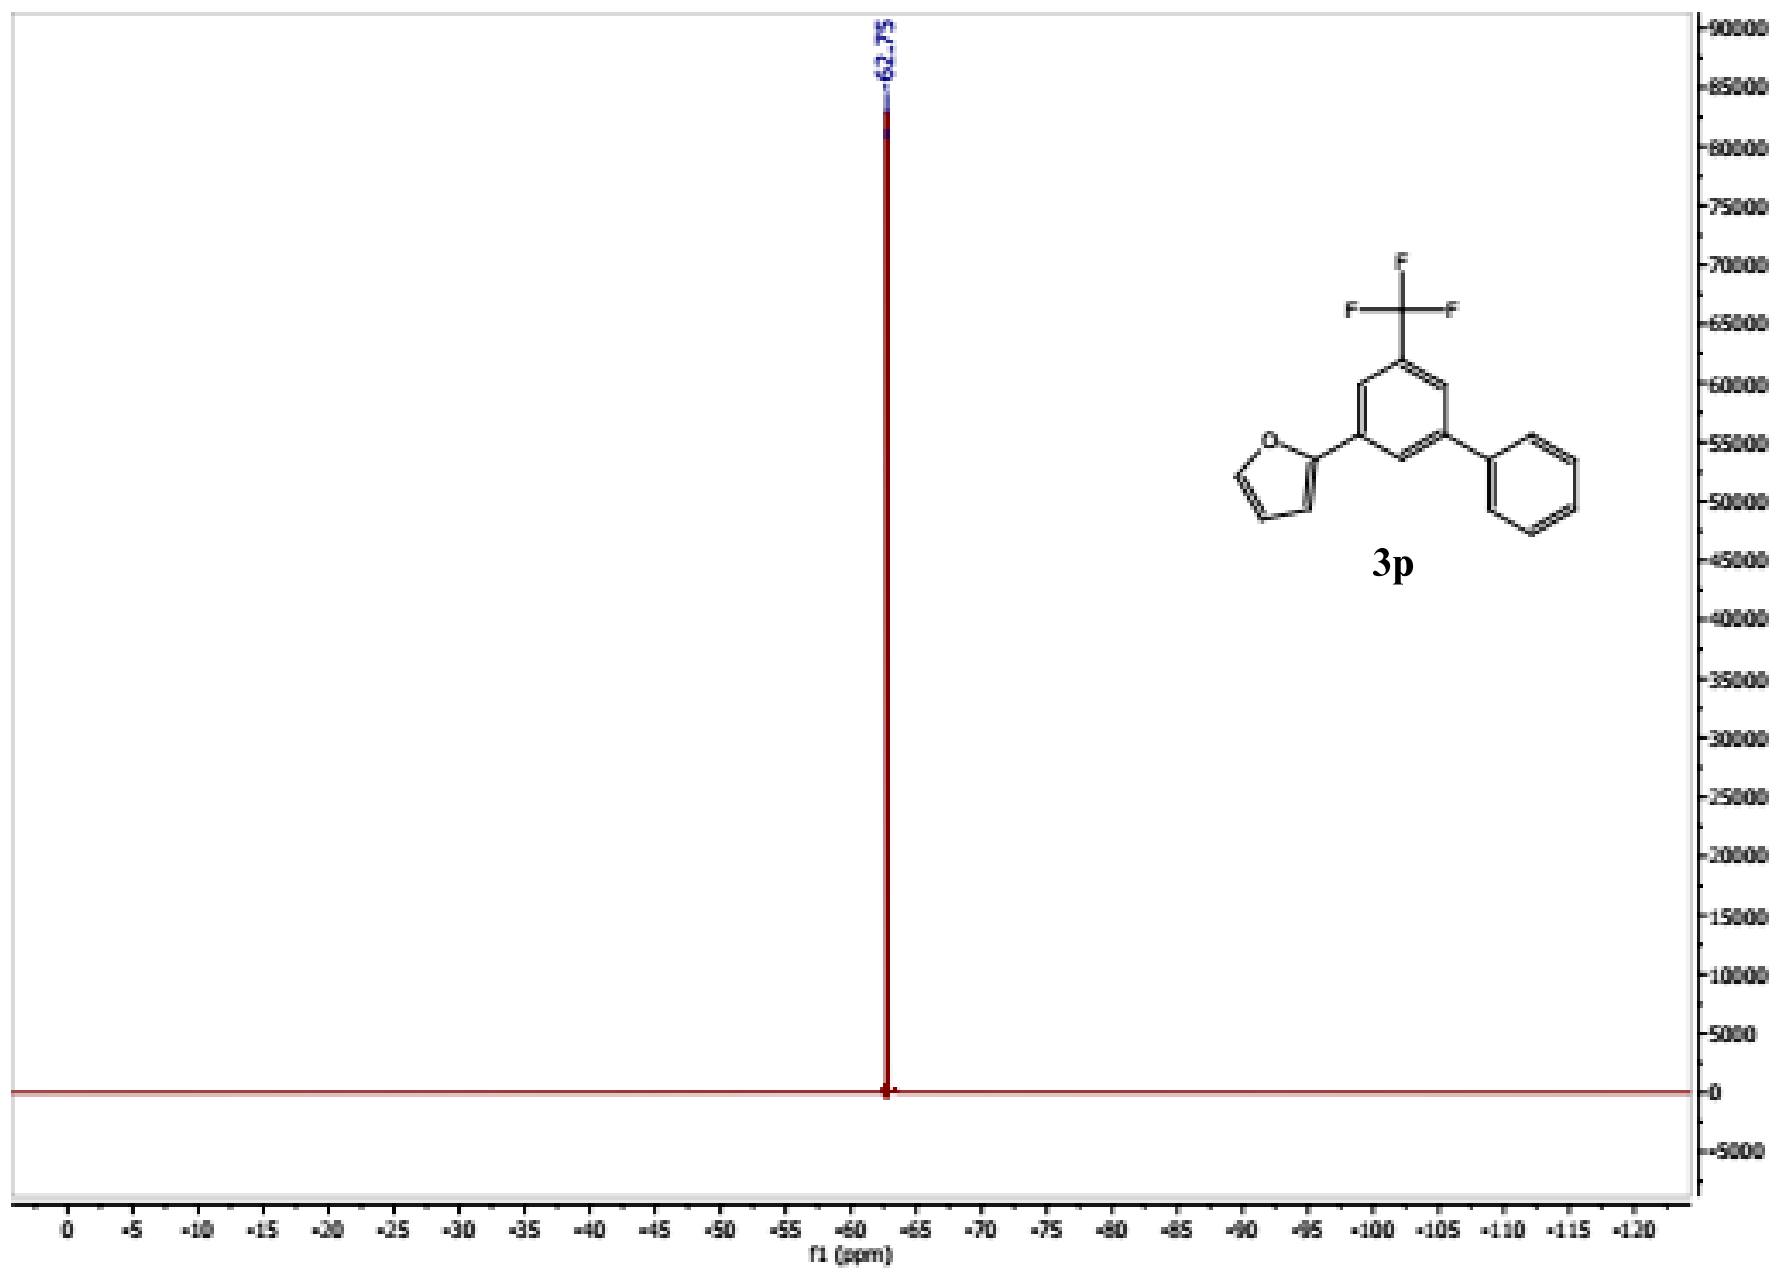

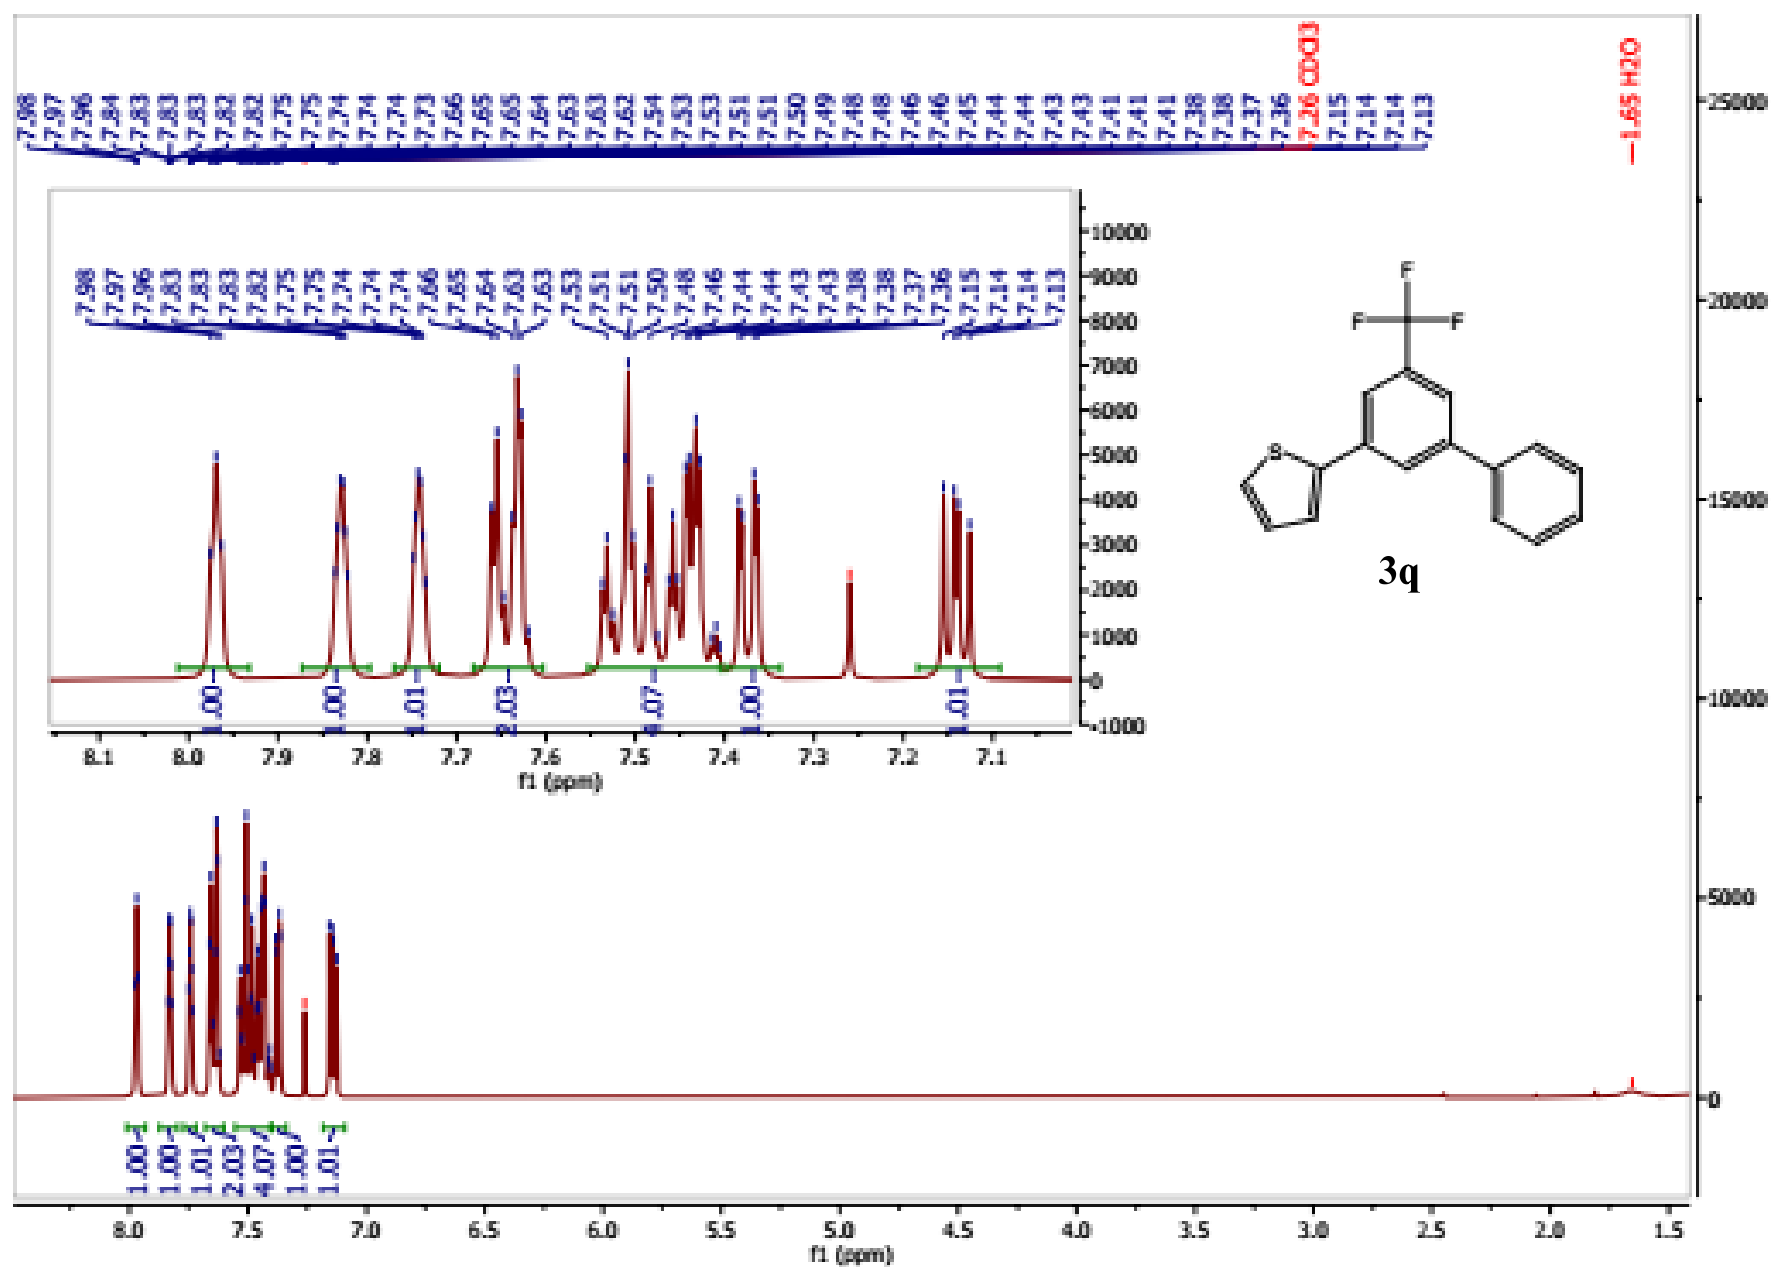

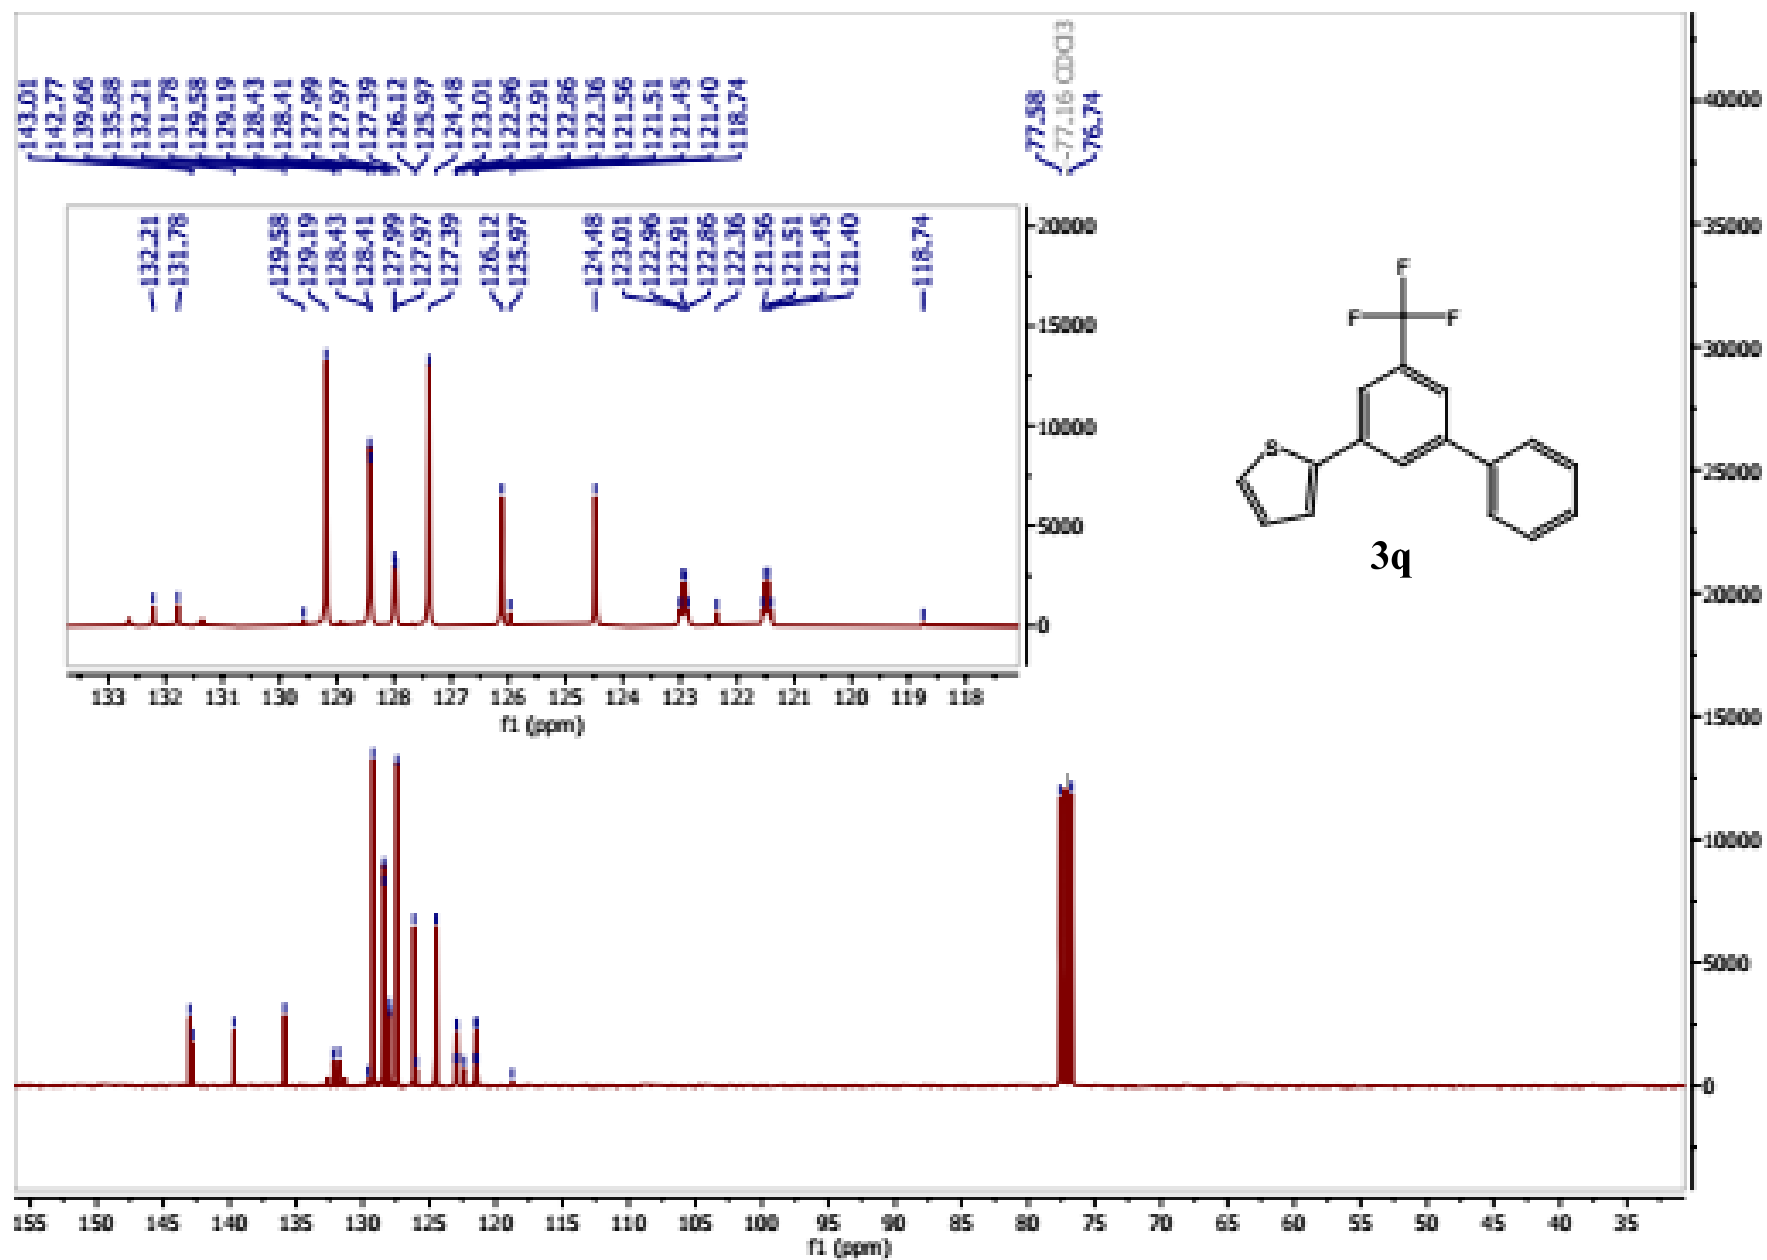



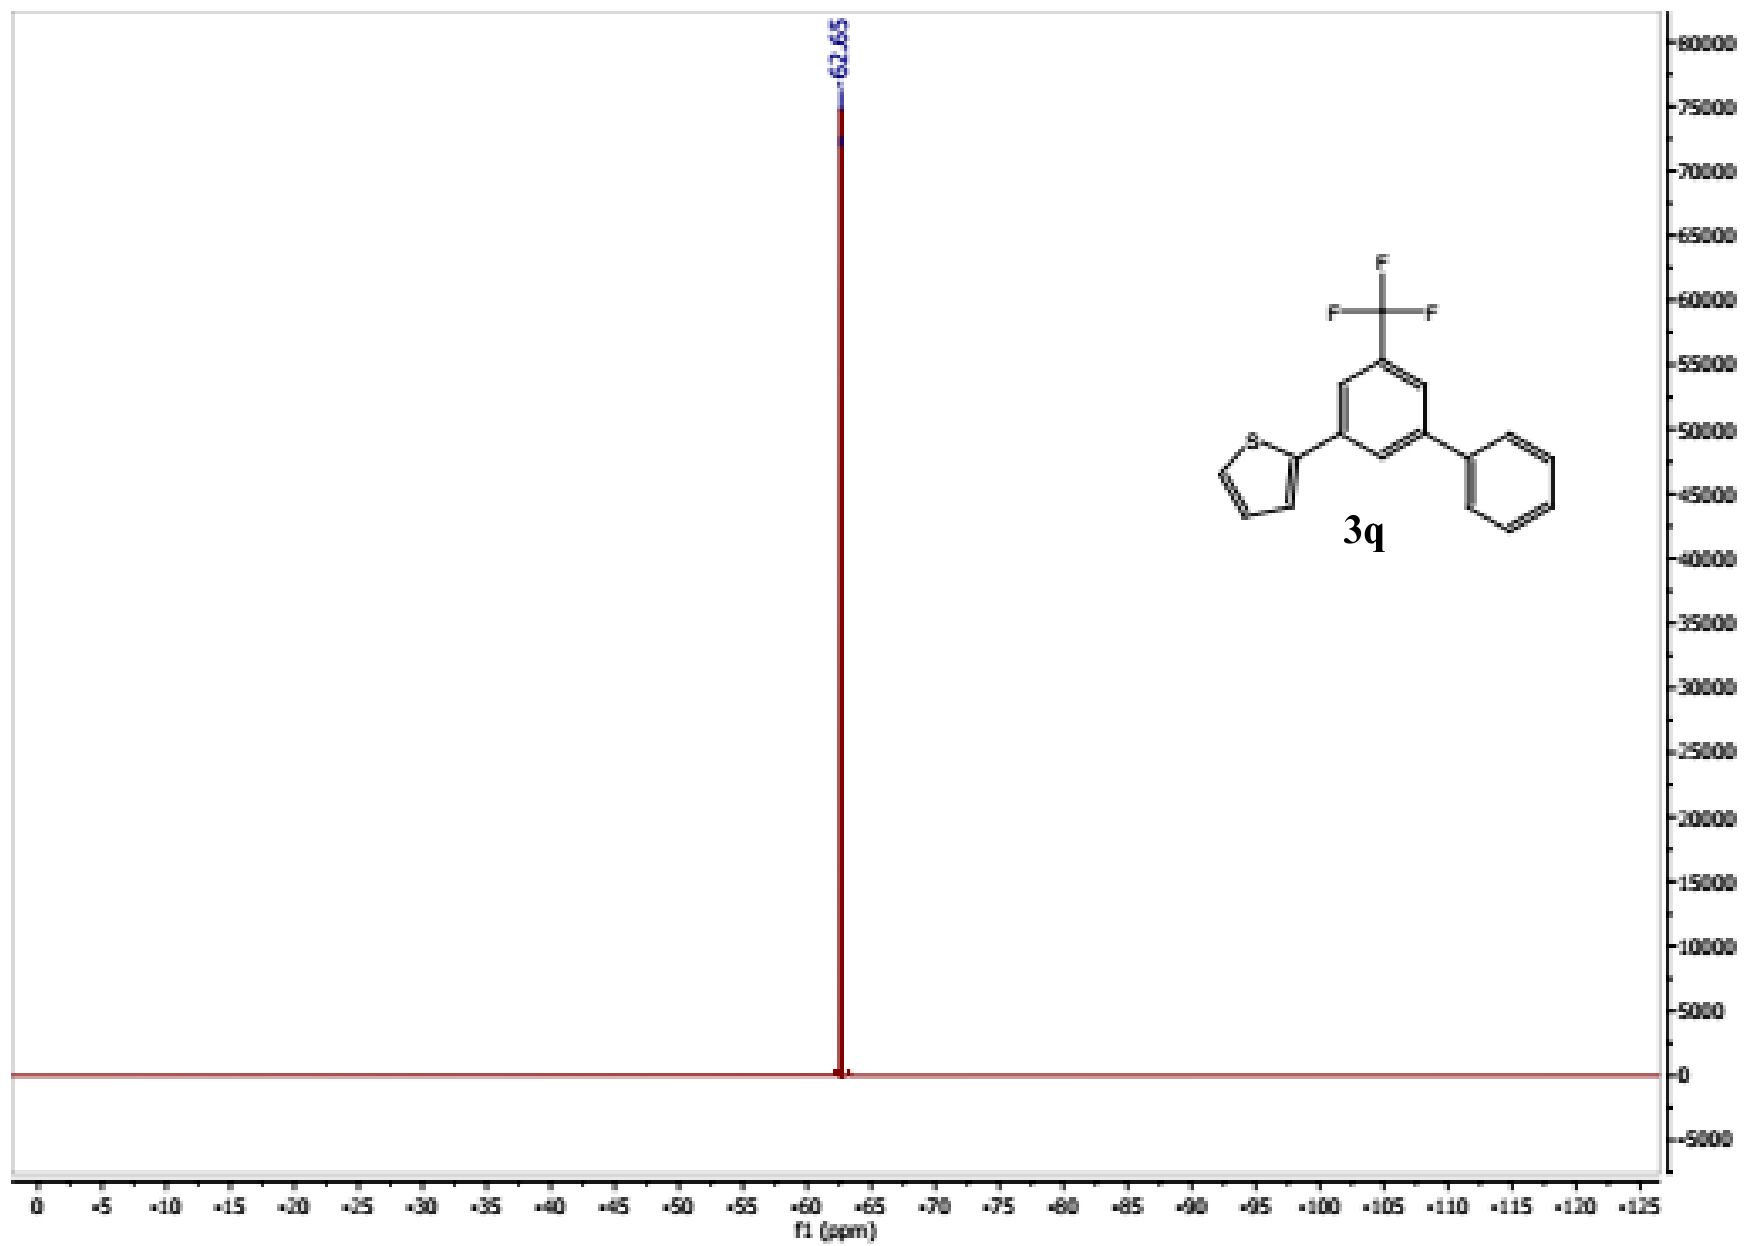

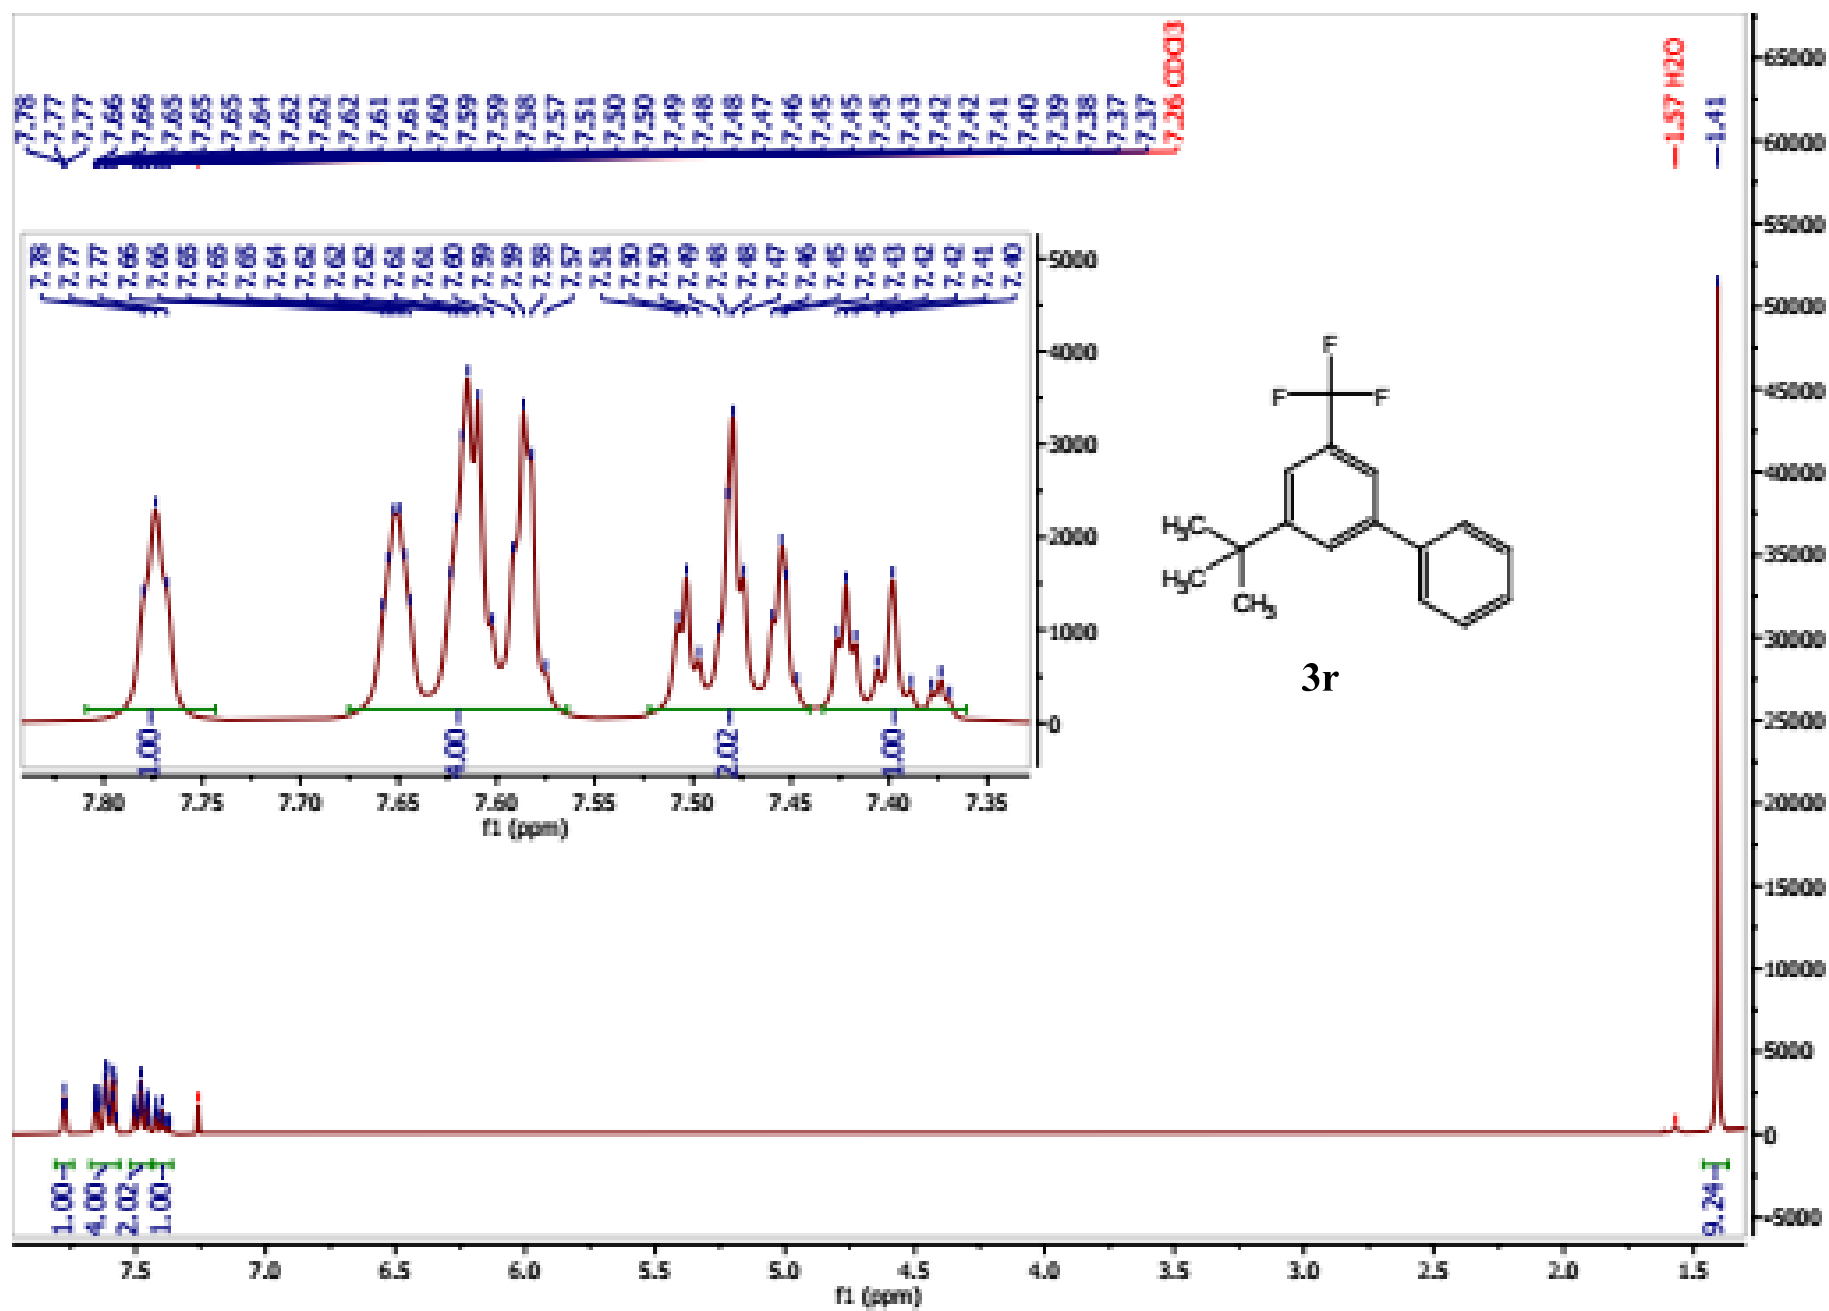

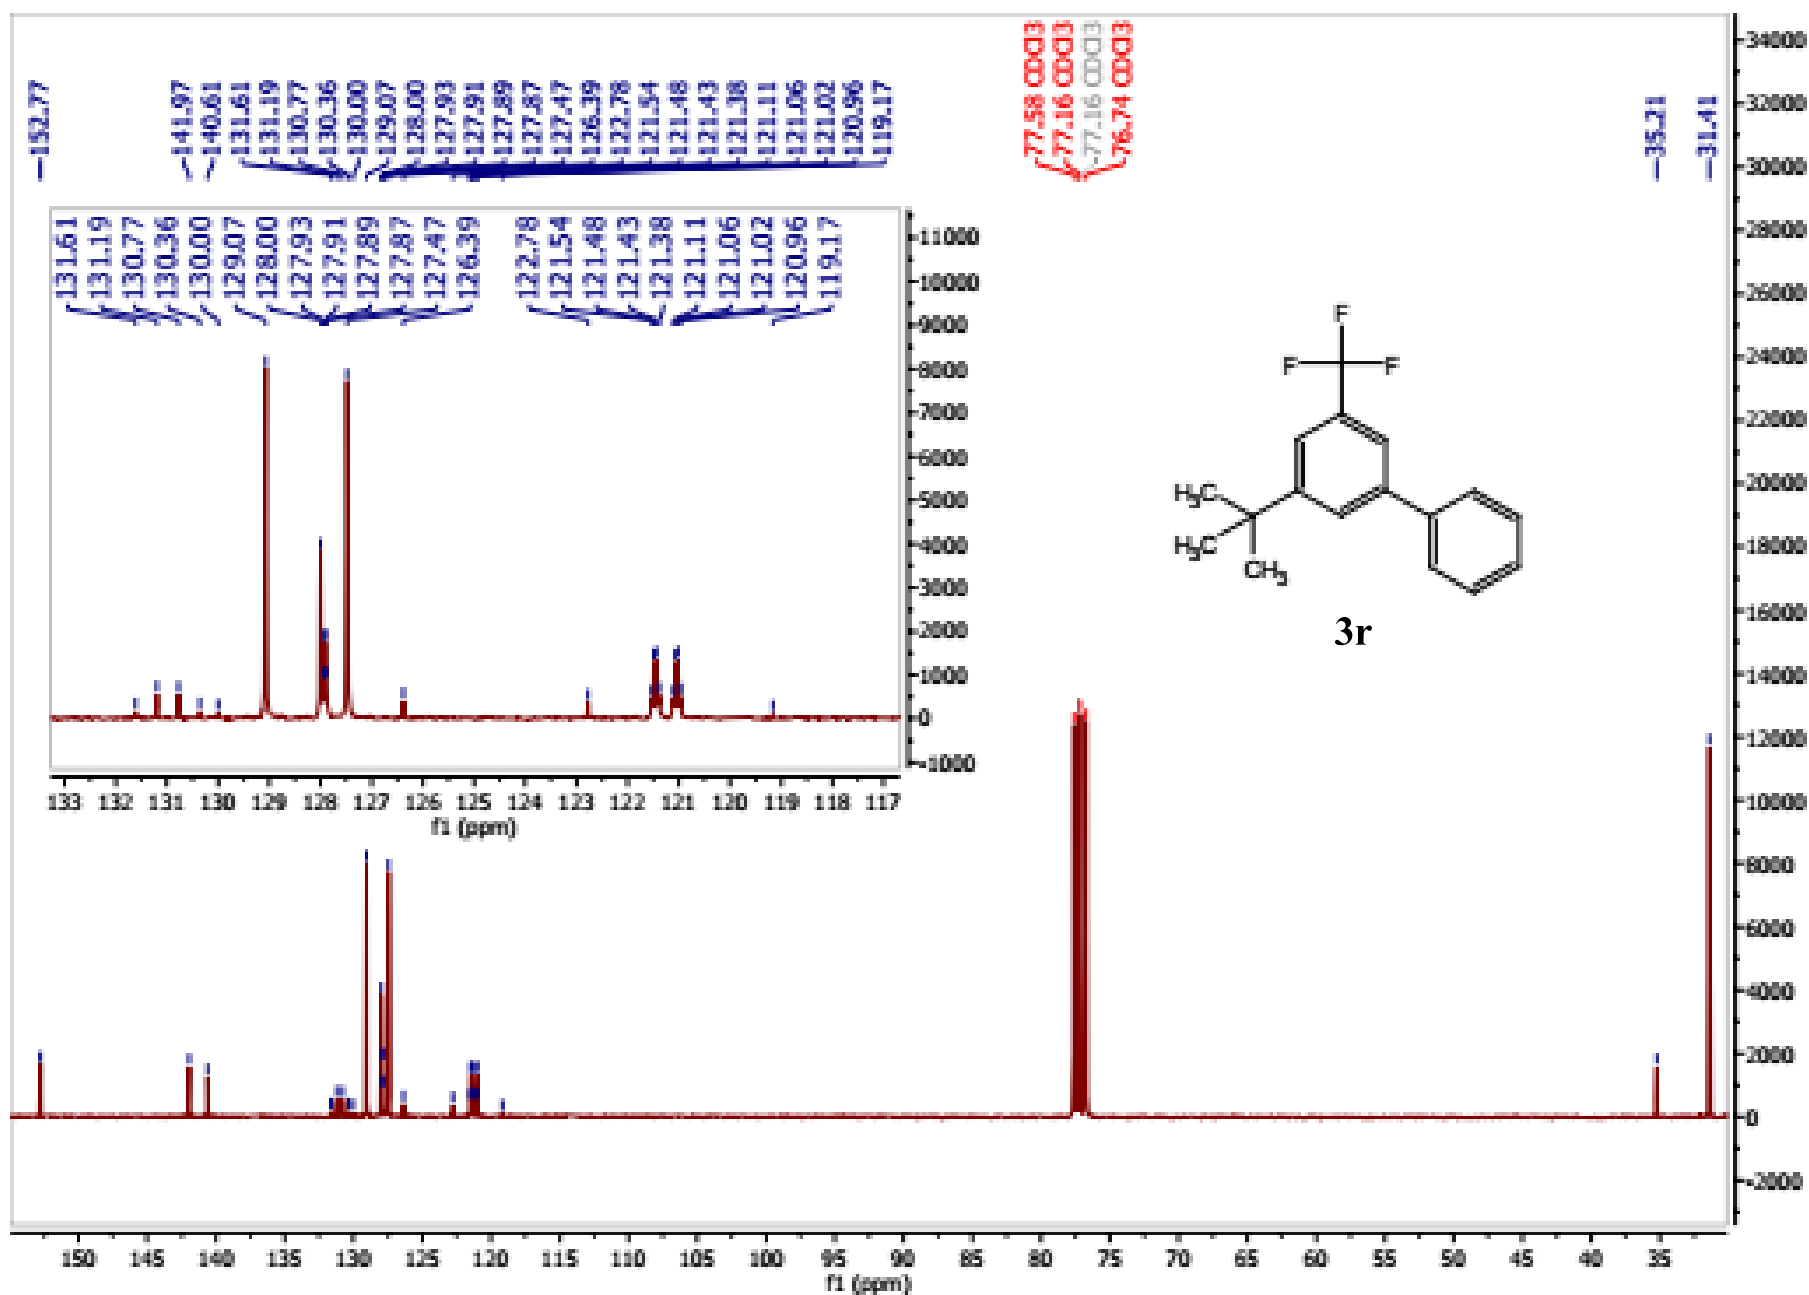

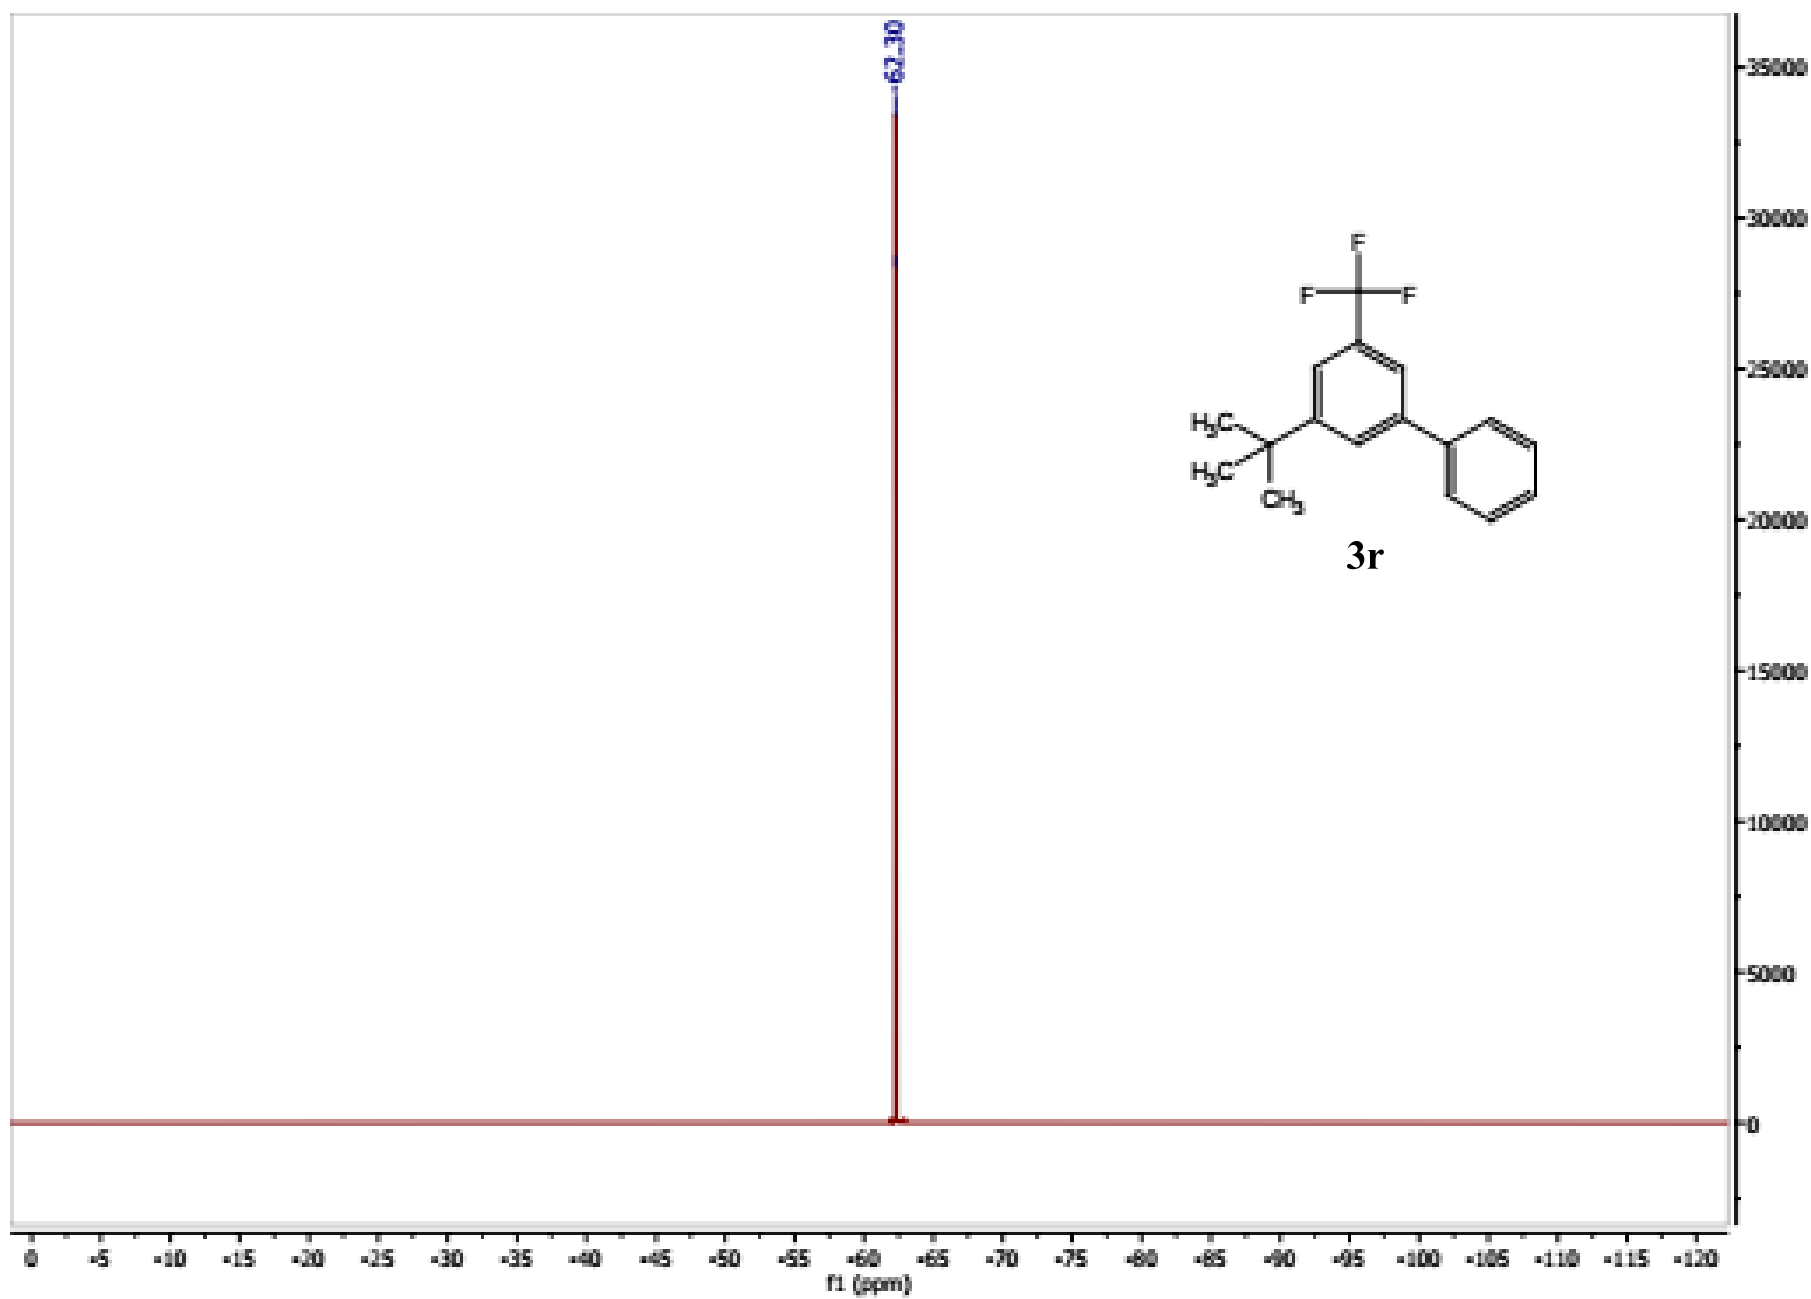

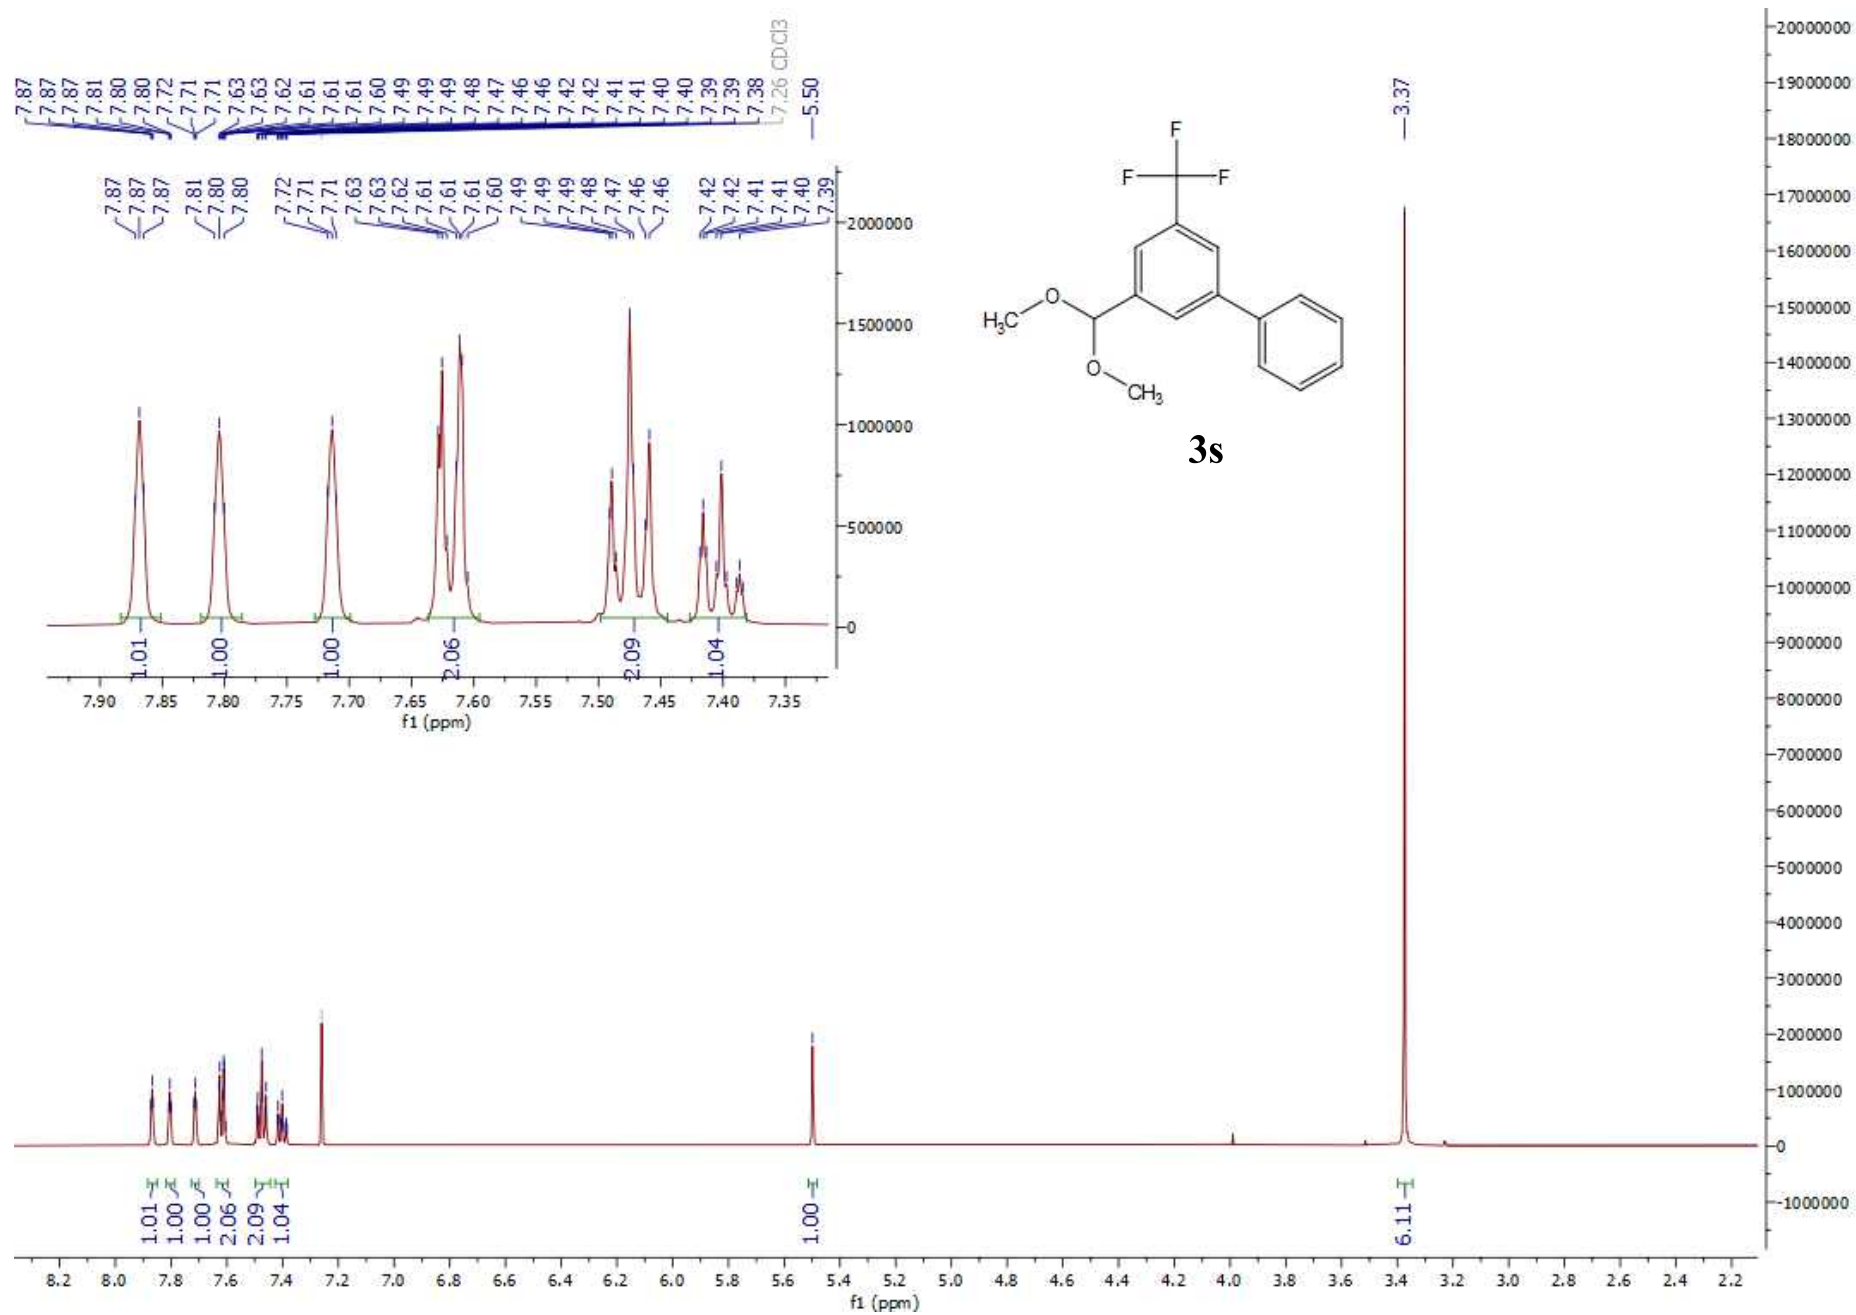

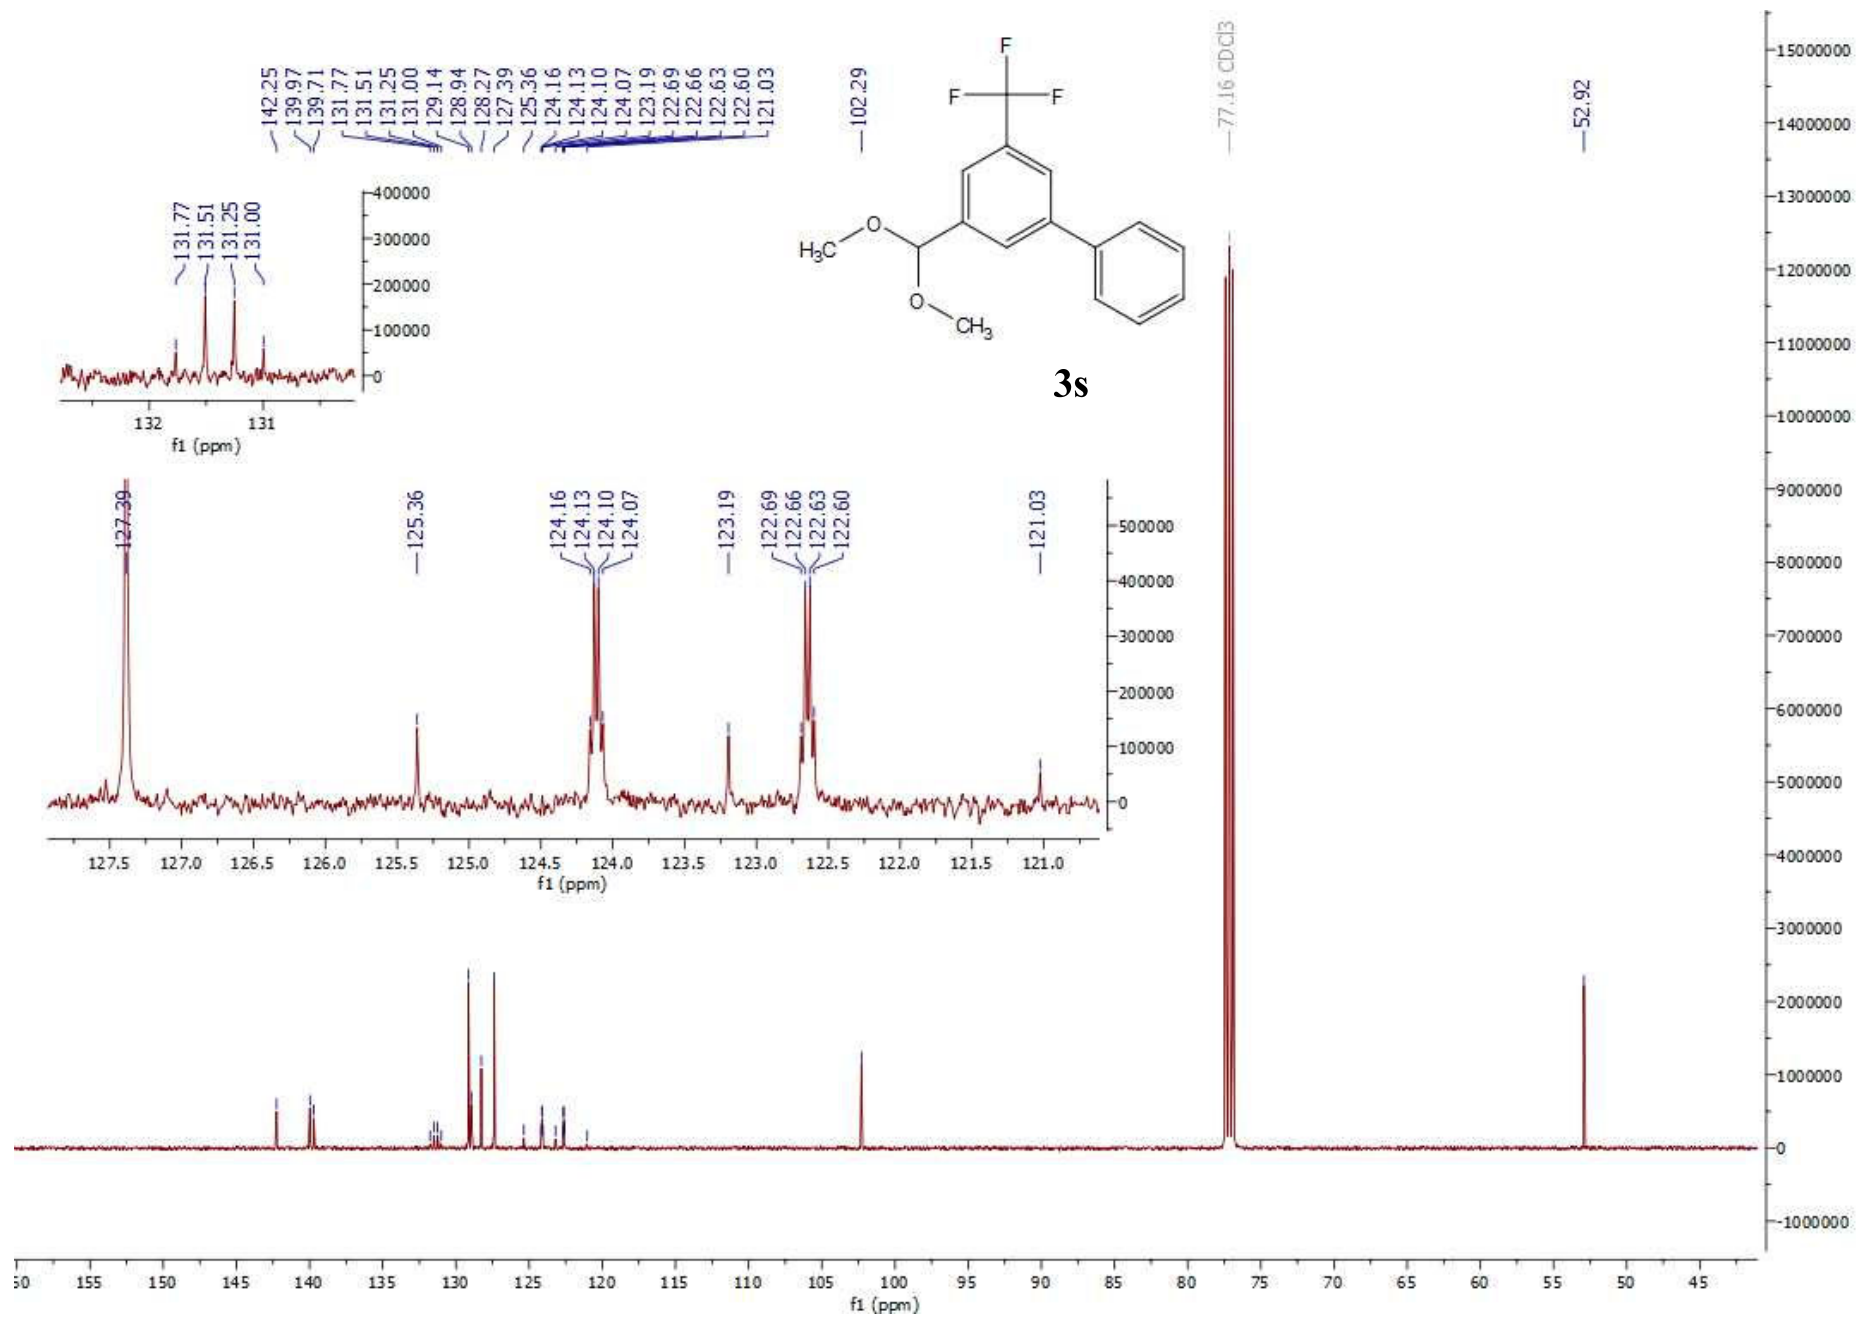

S115

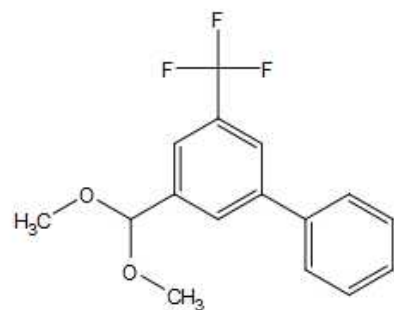

**3s**

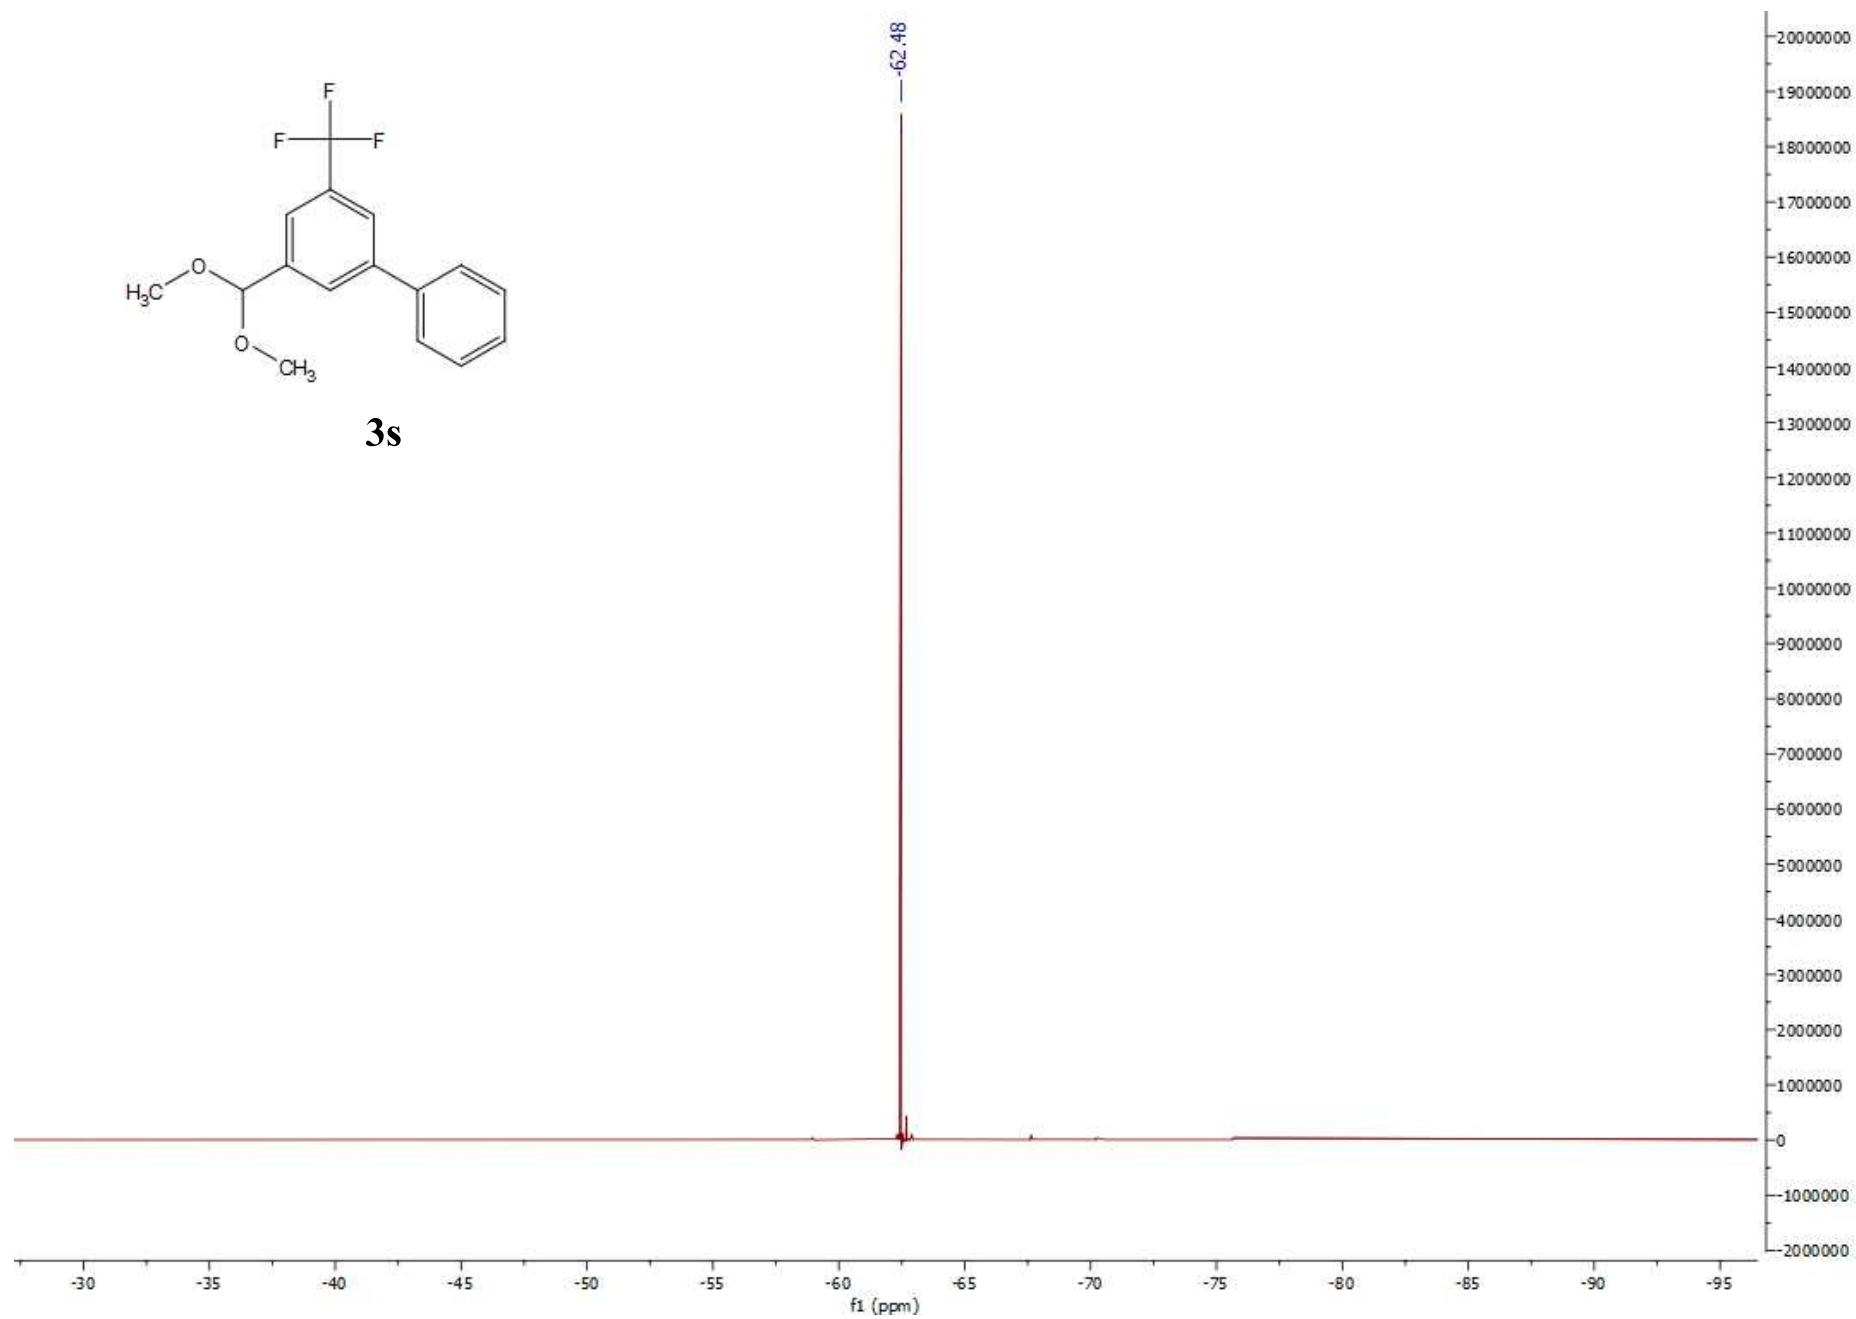

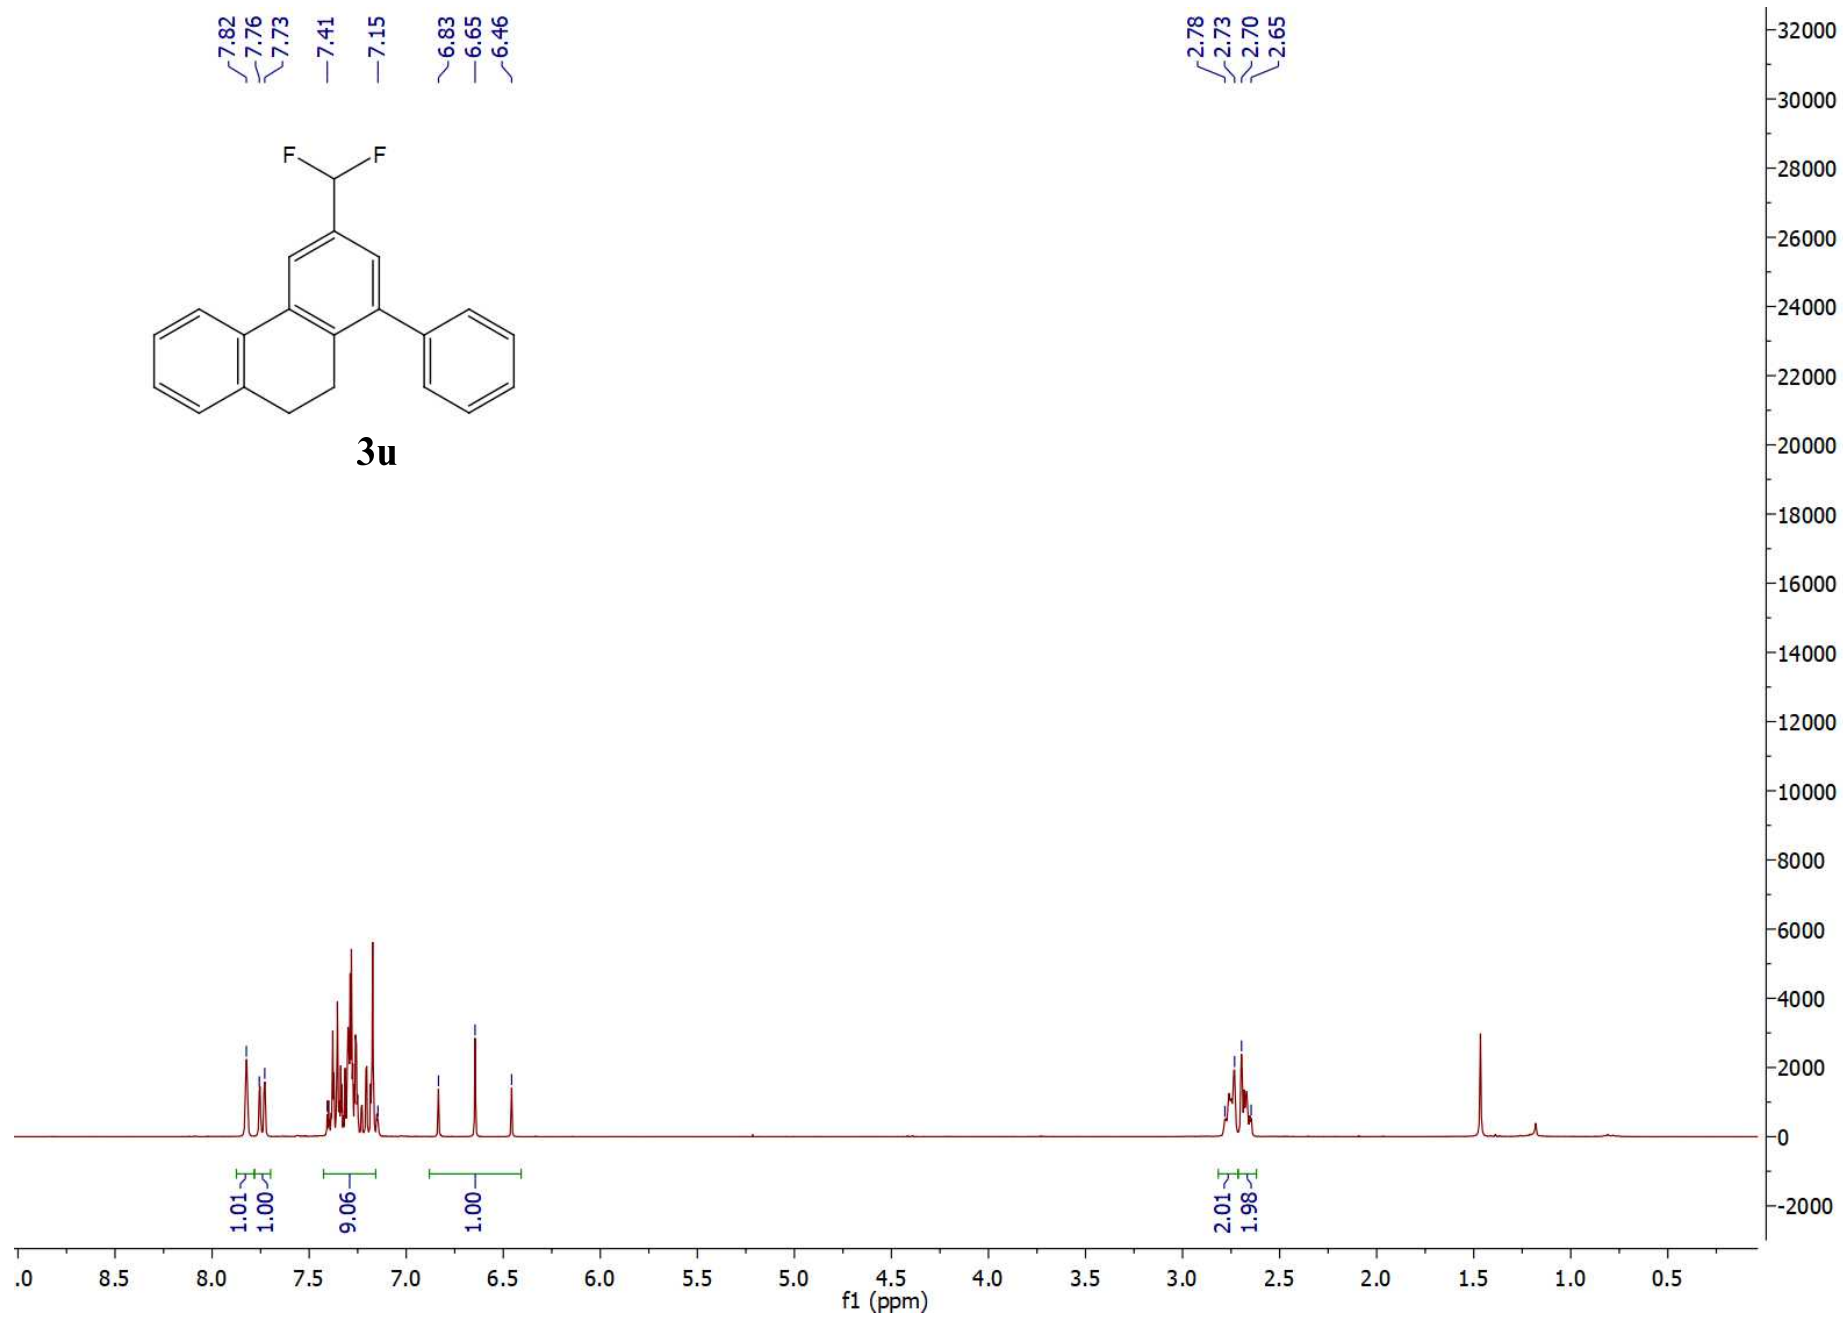



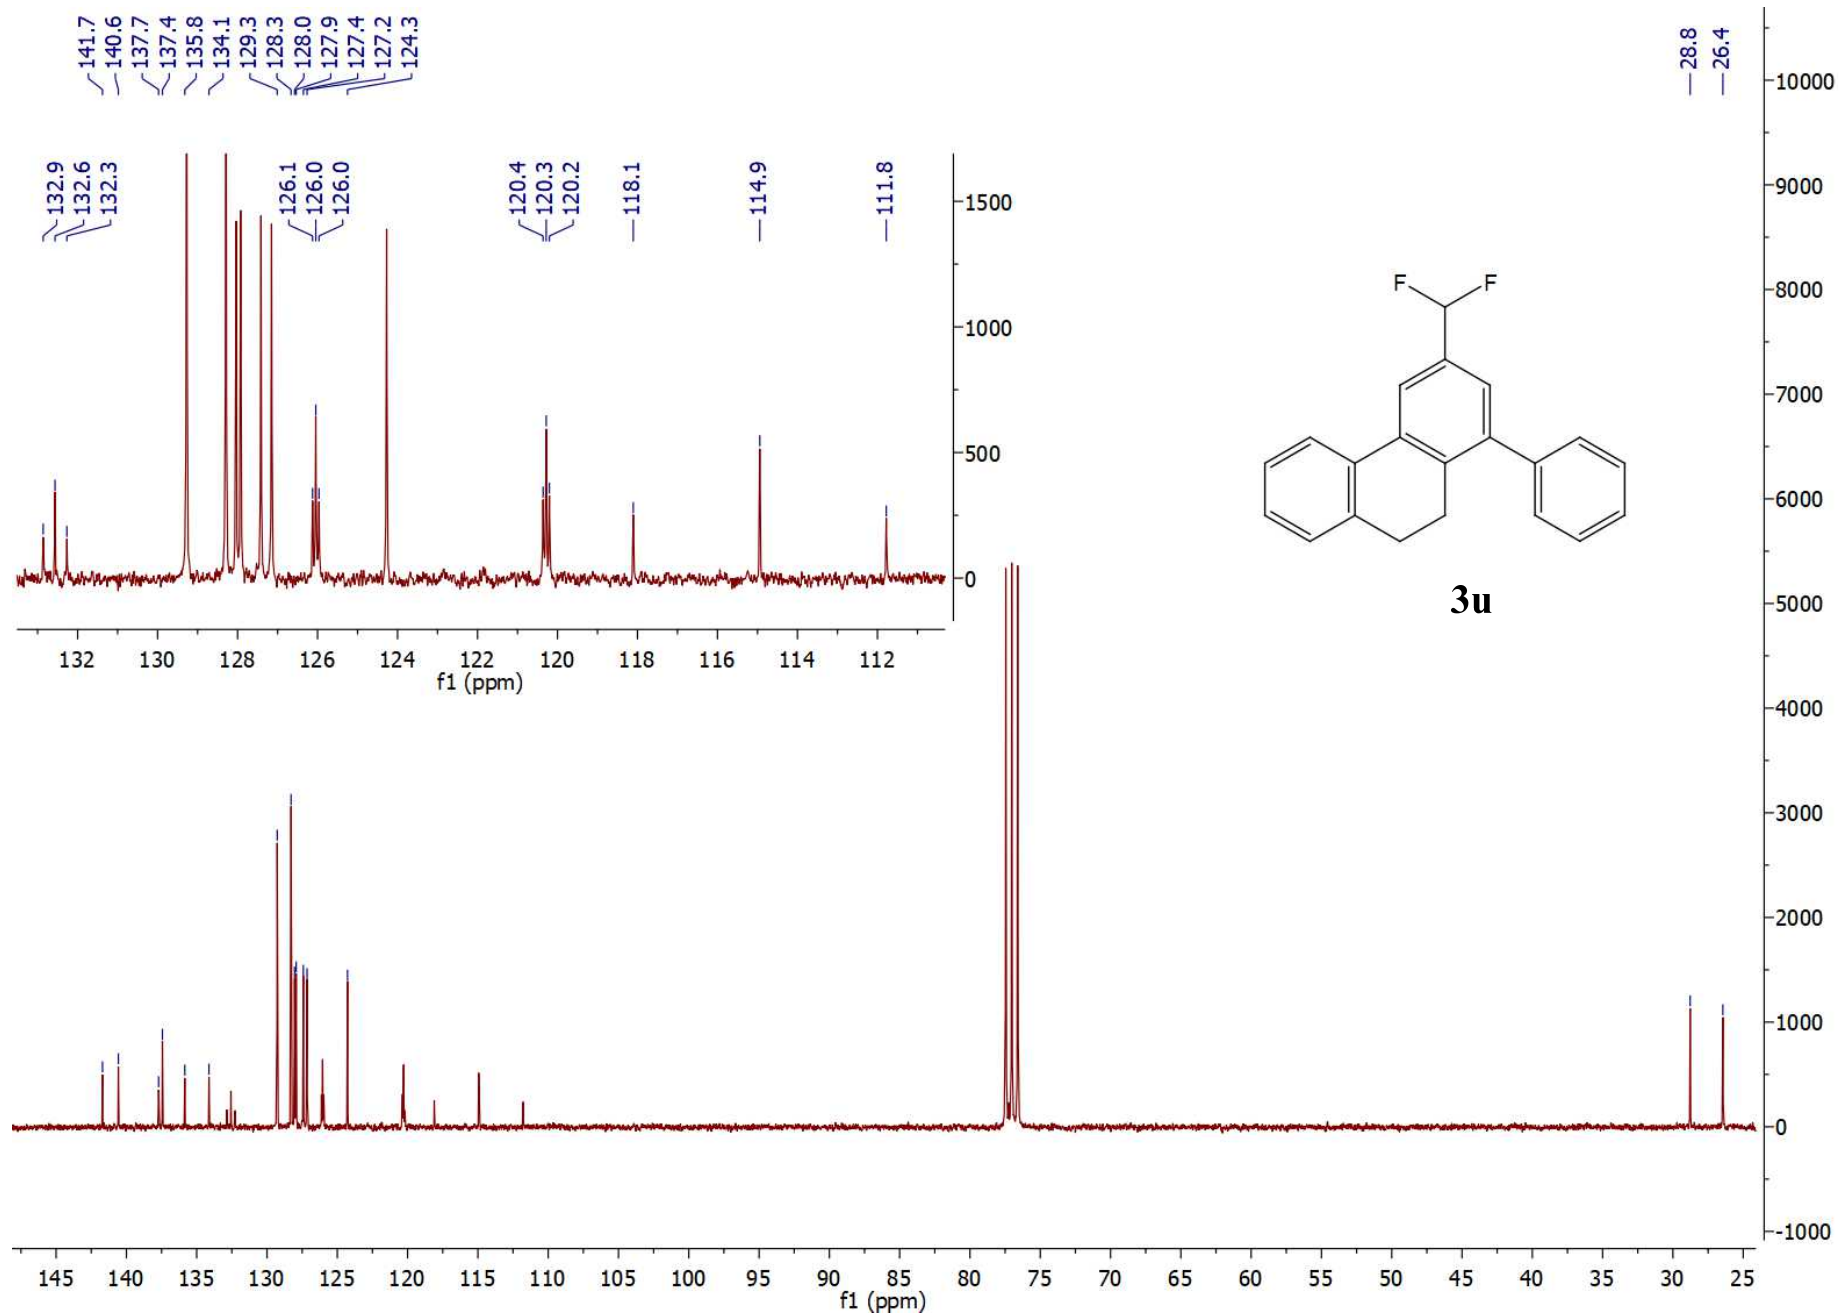

S118

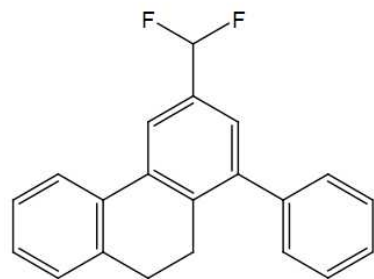

**3u**

110.04  
110.05  
110.05  
110.24  
110.25  
110.25

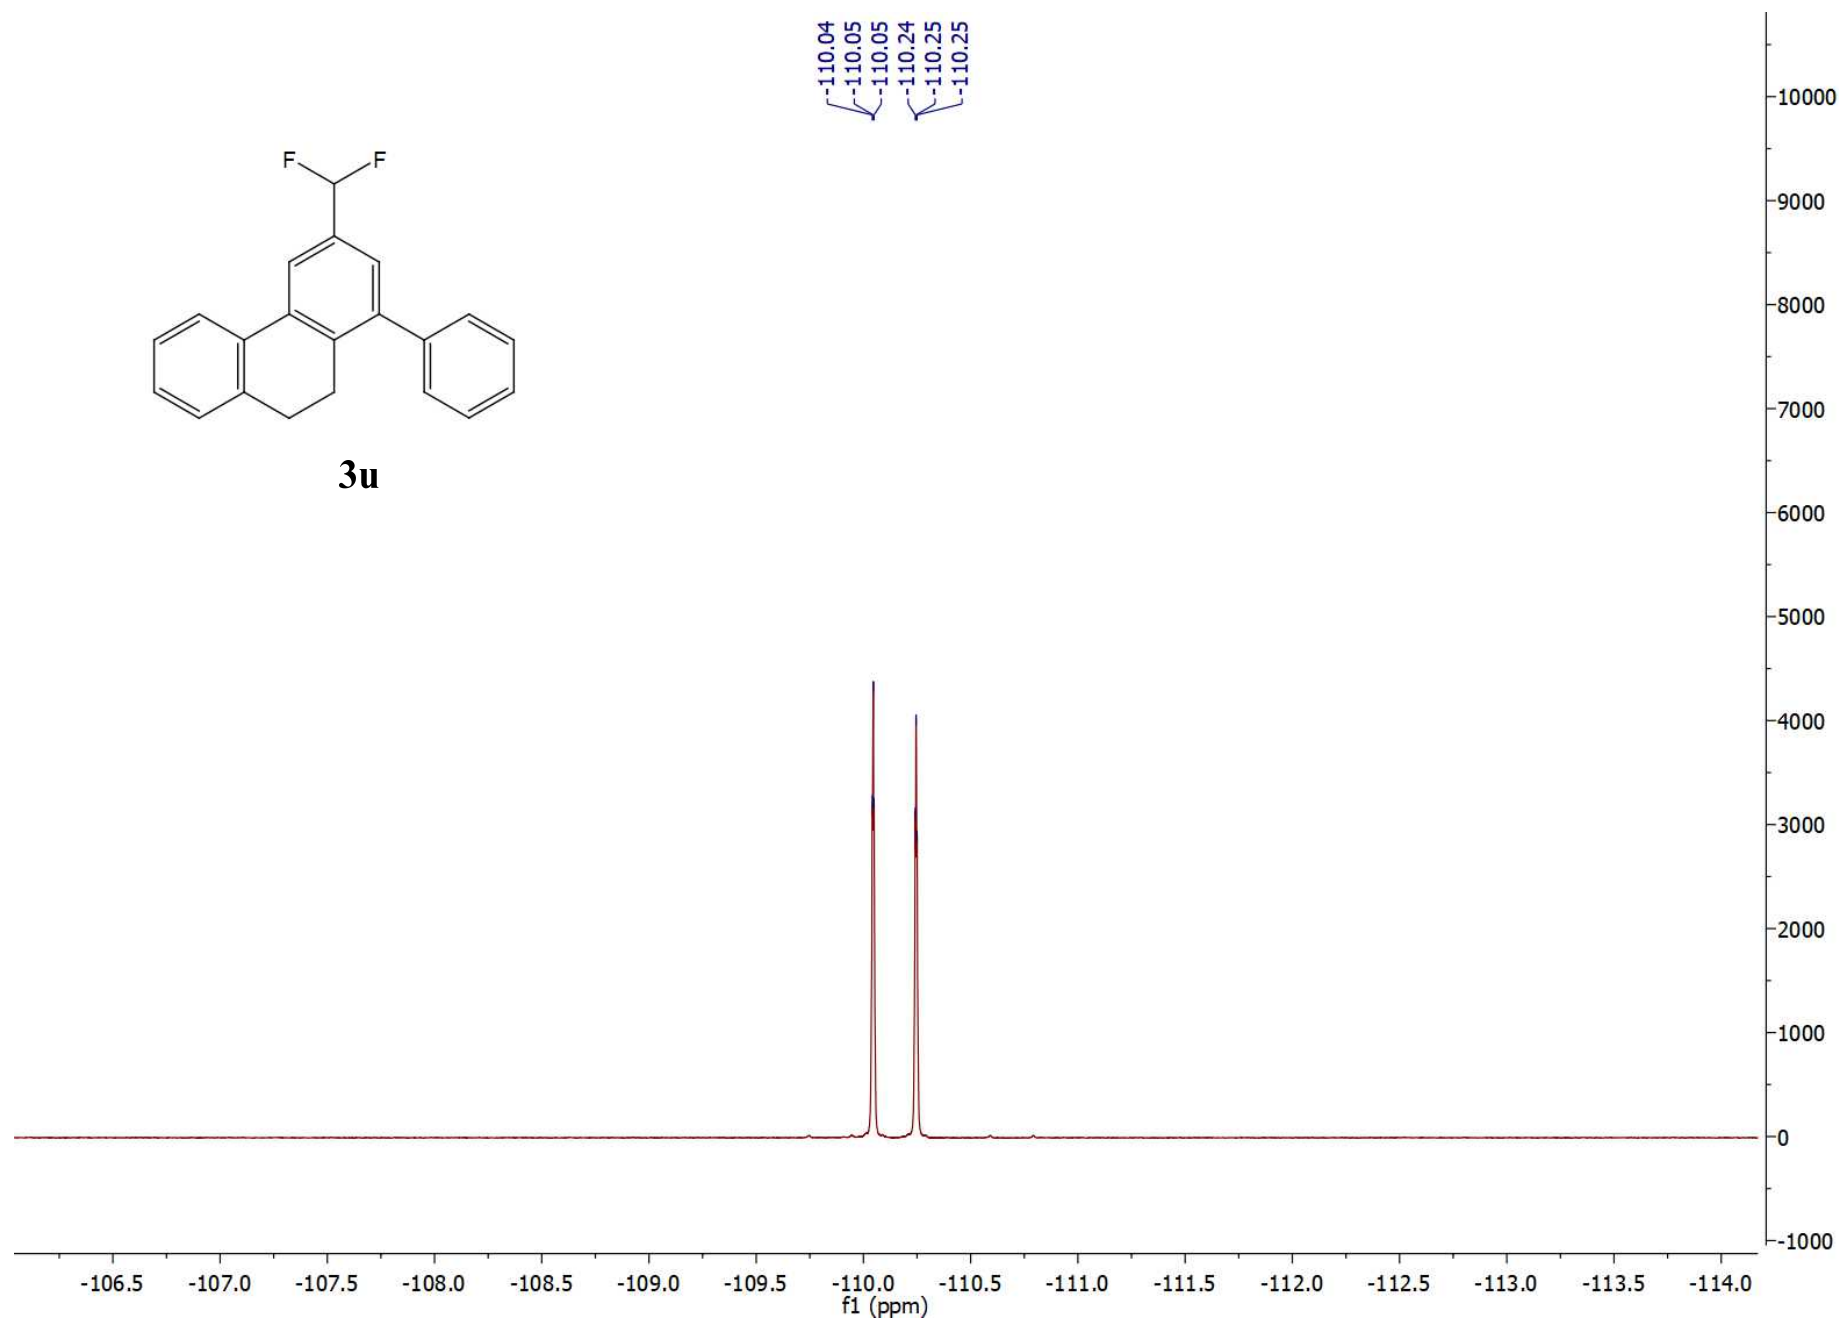

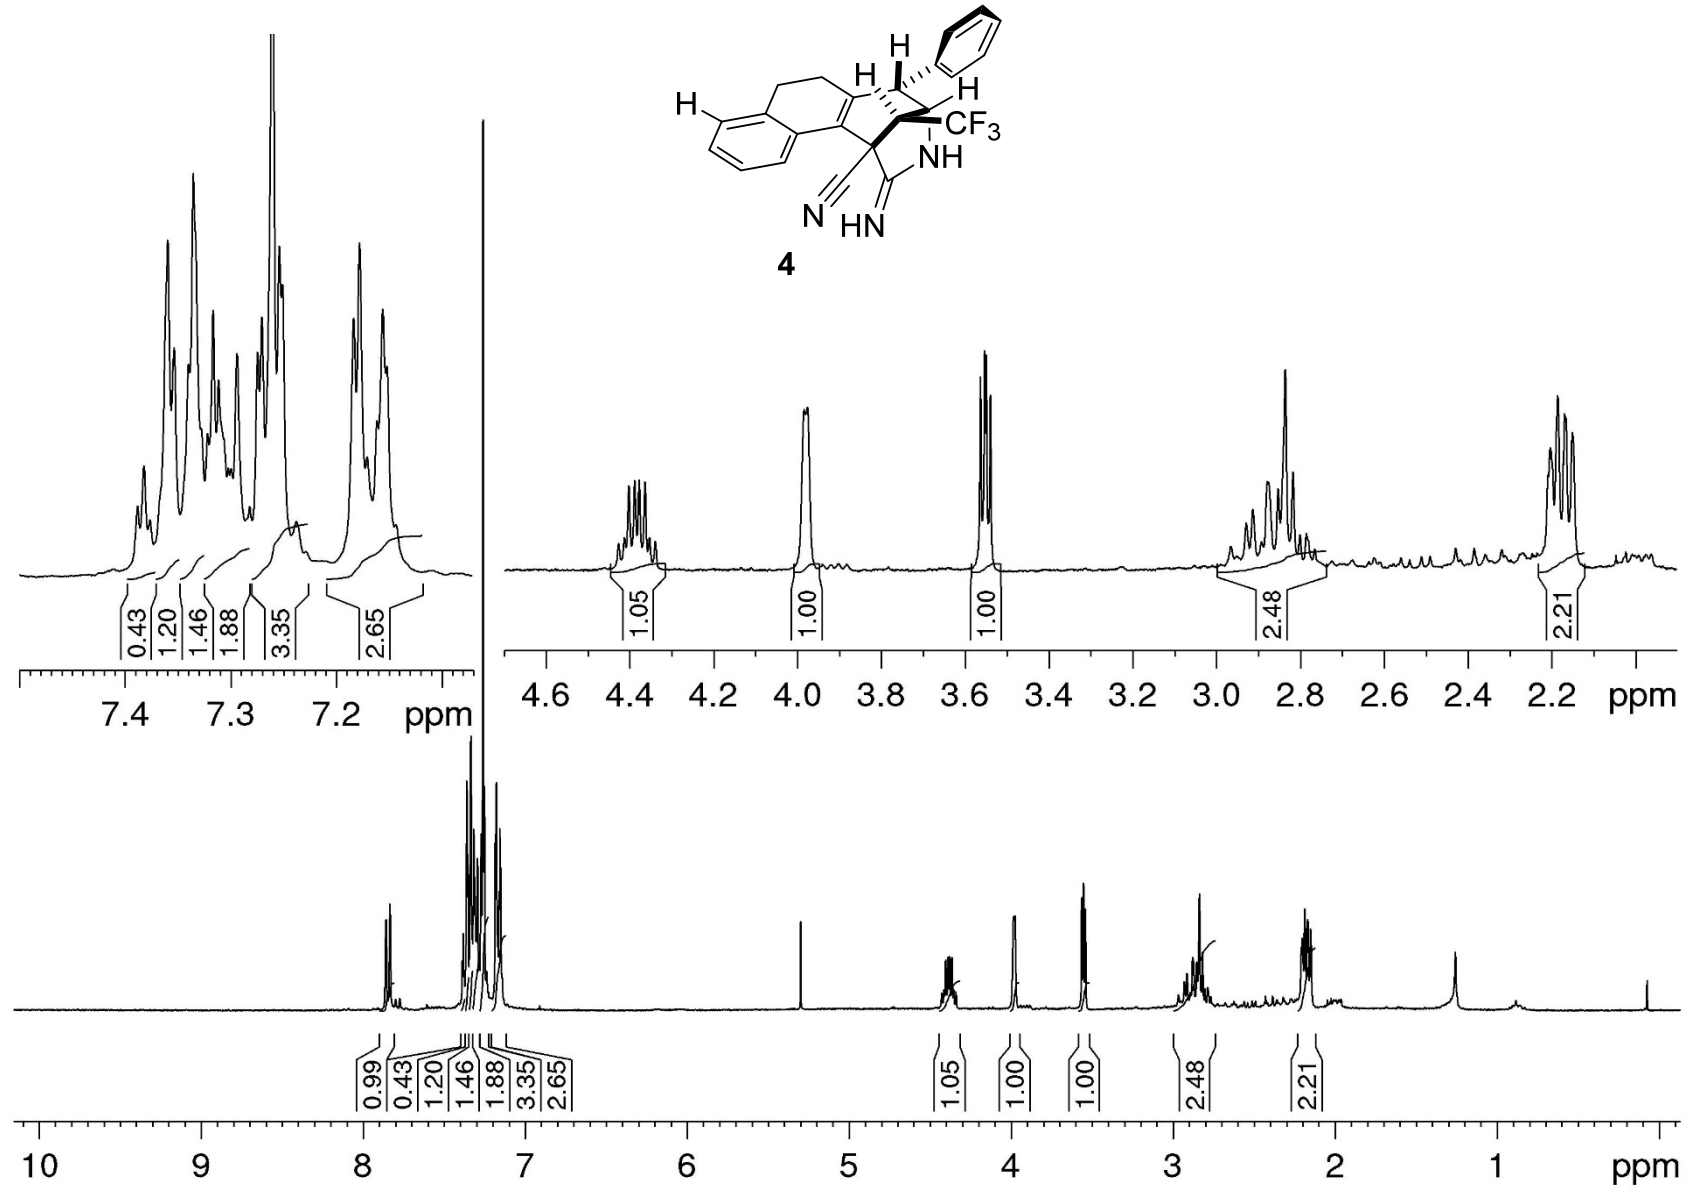

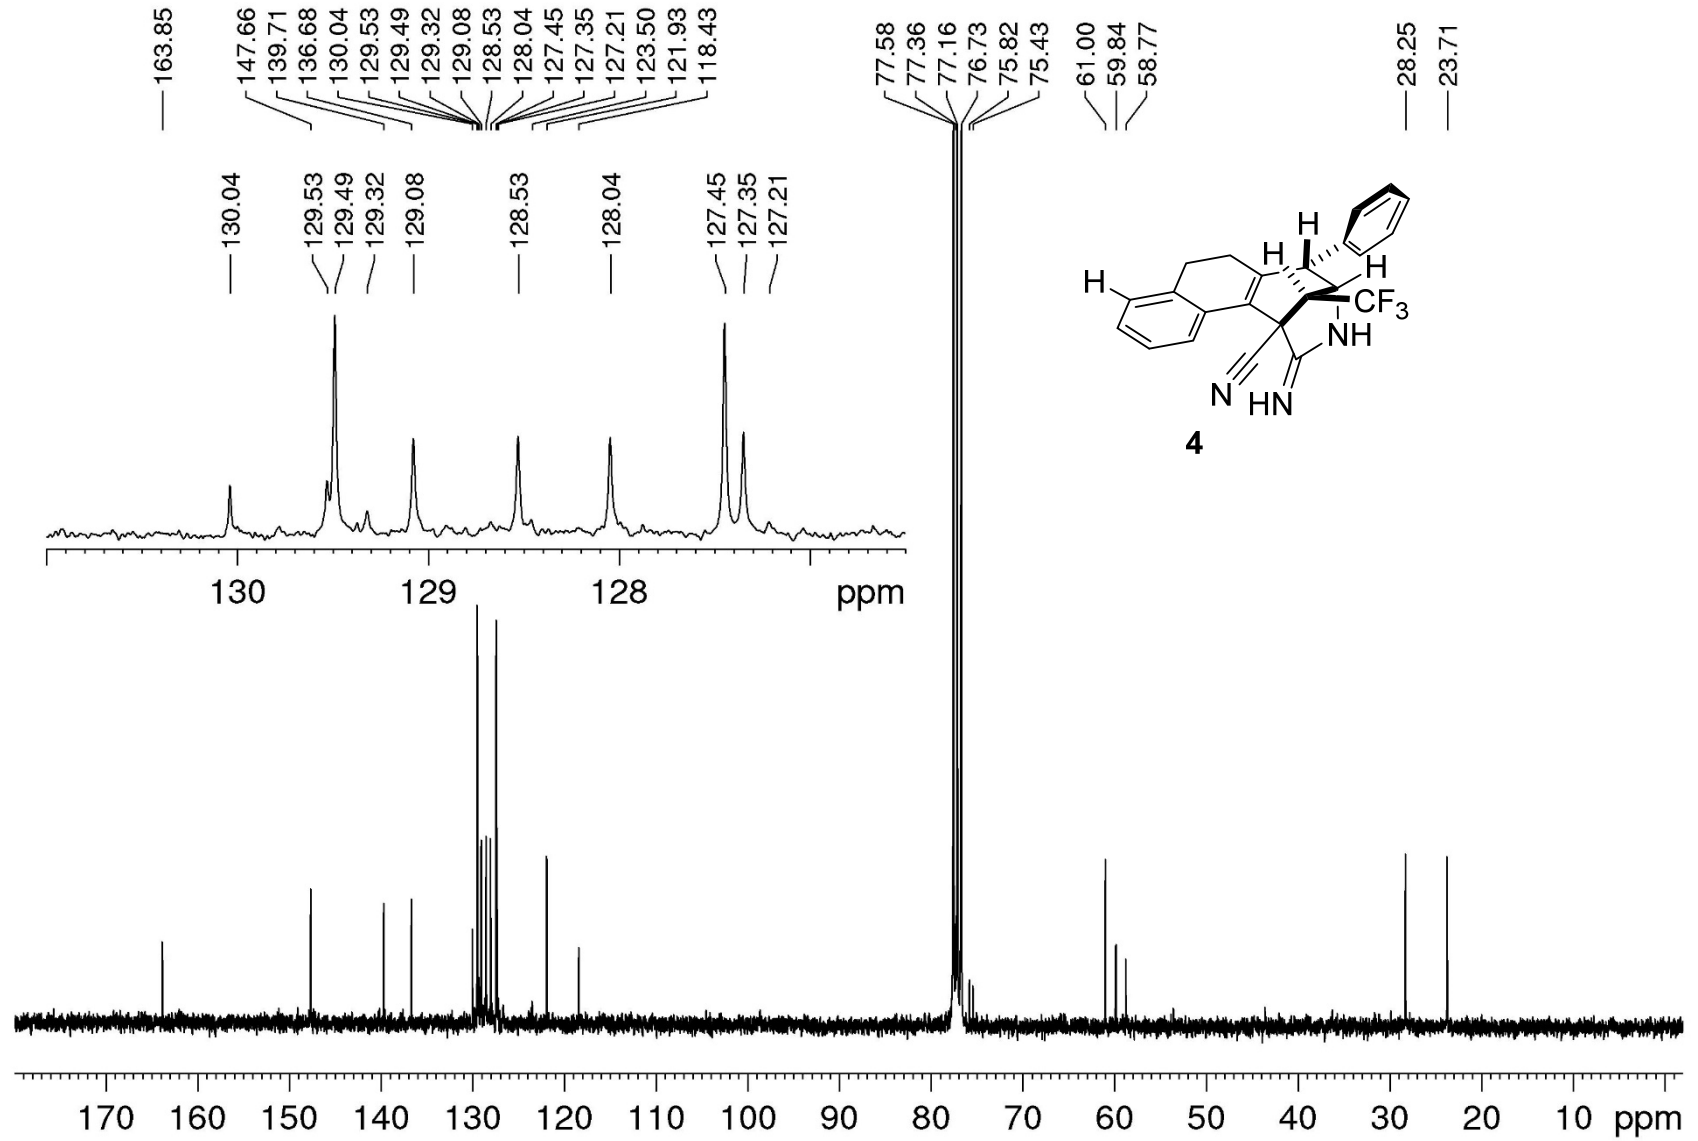

S121

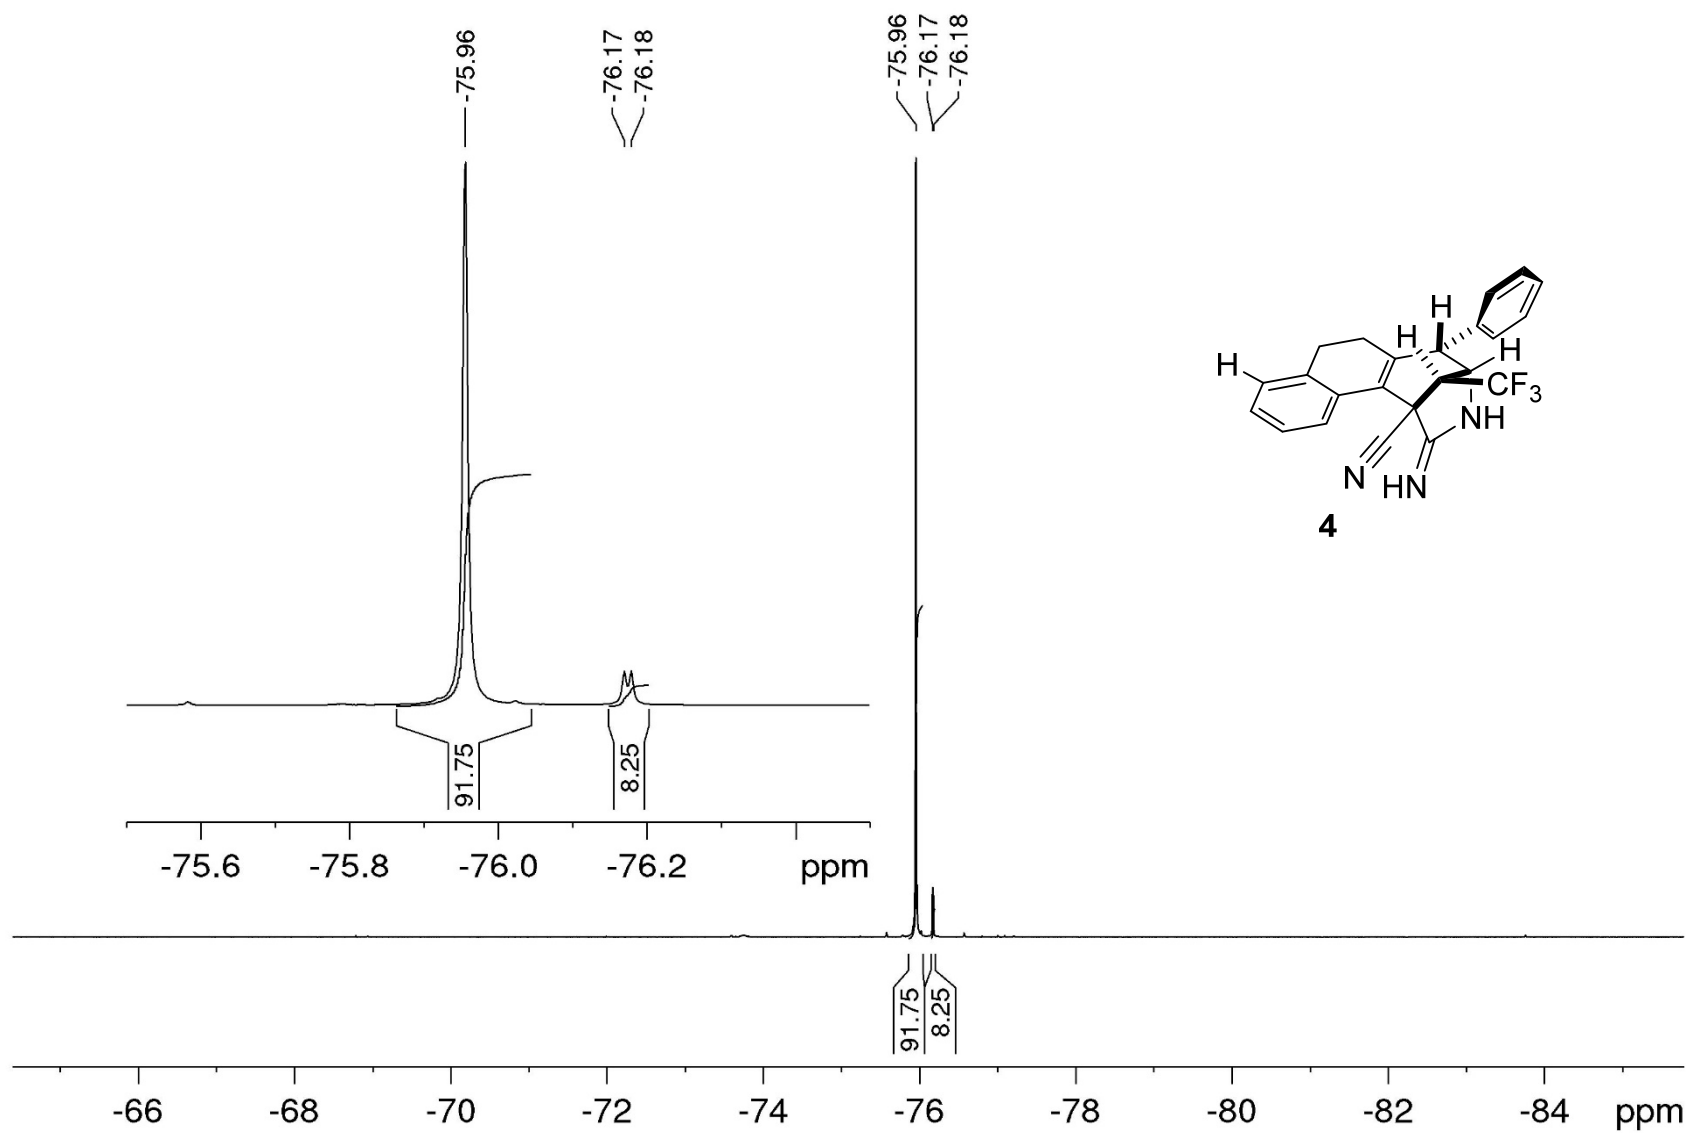

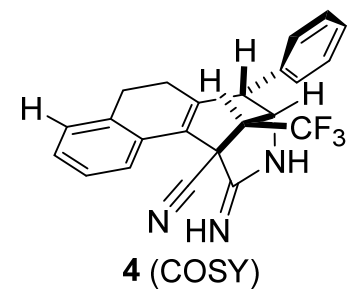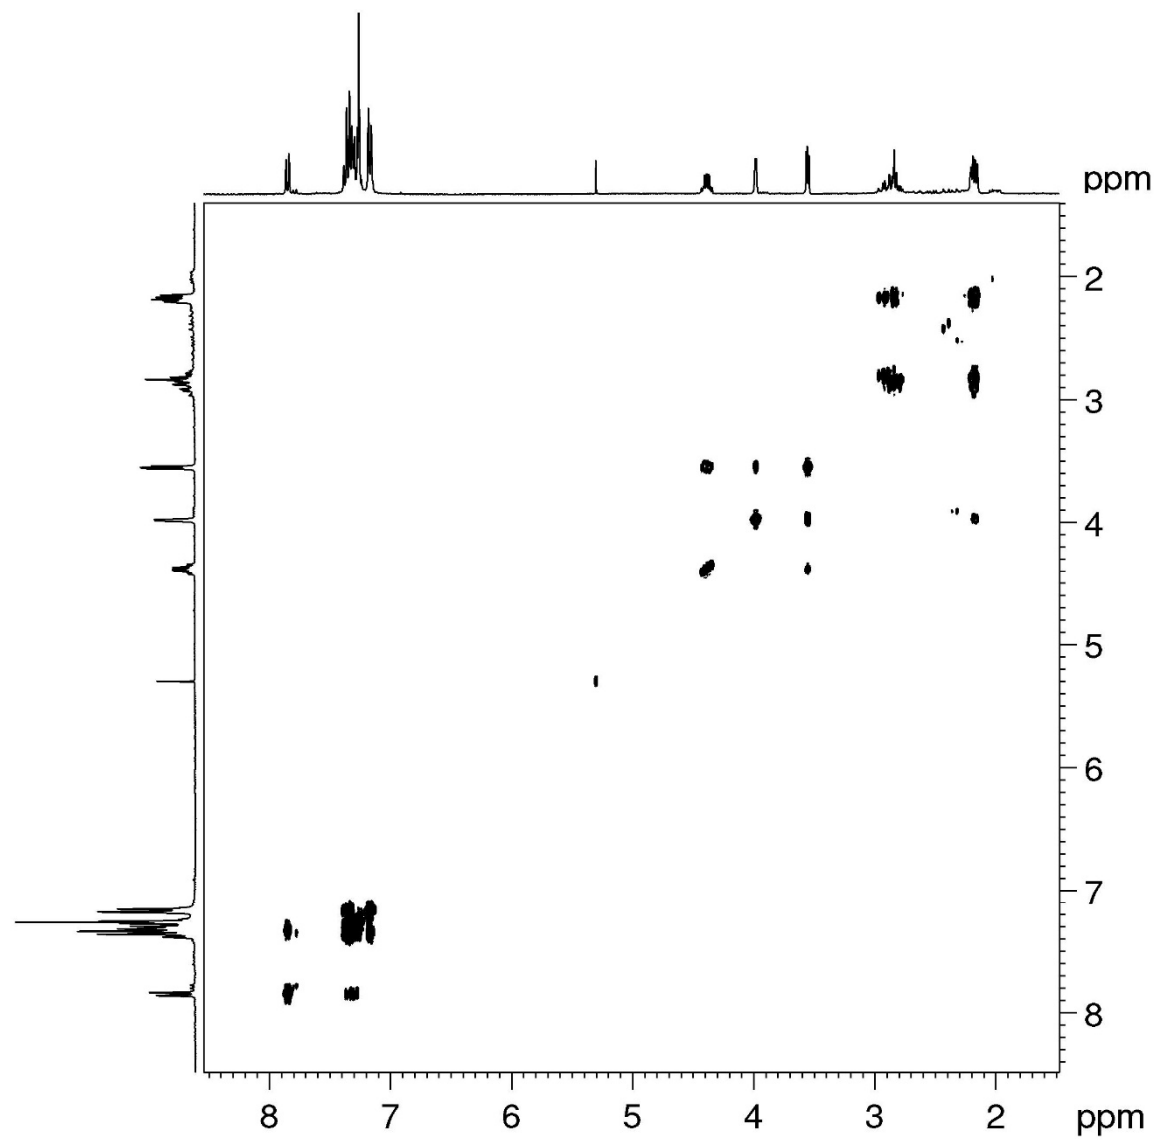

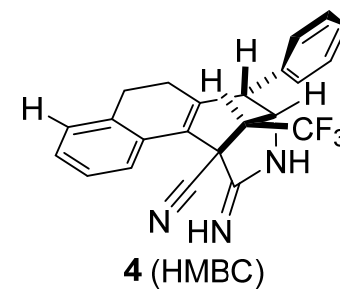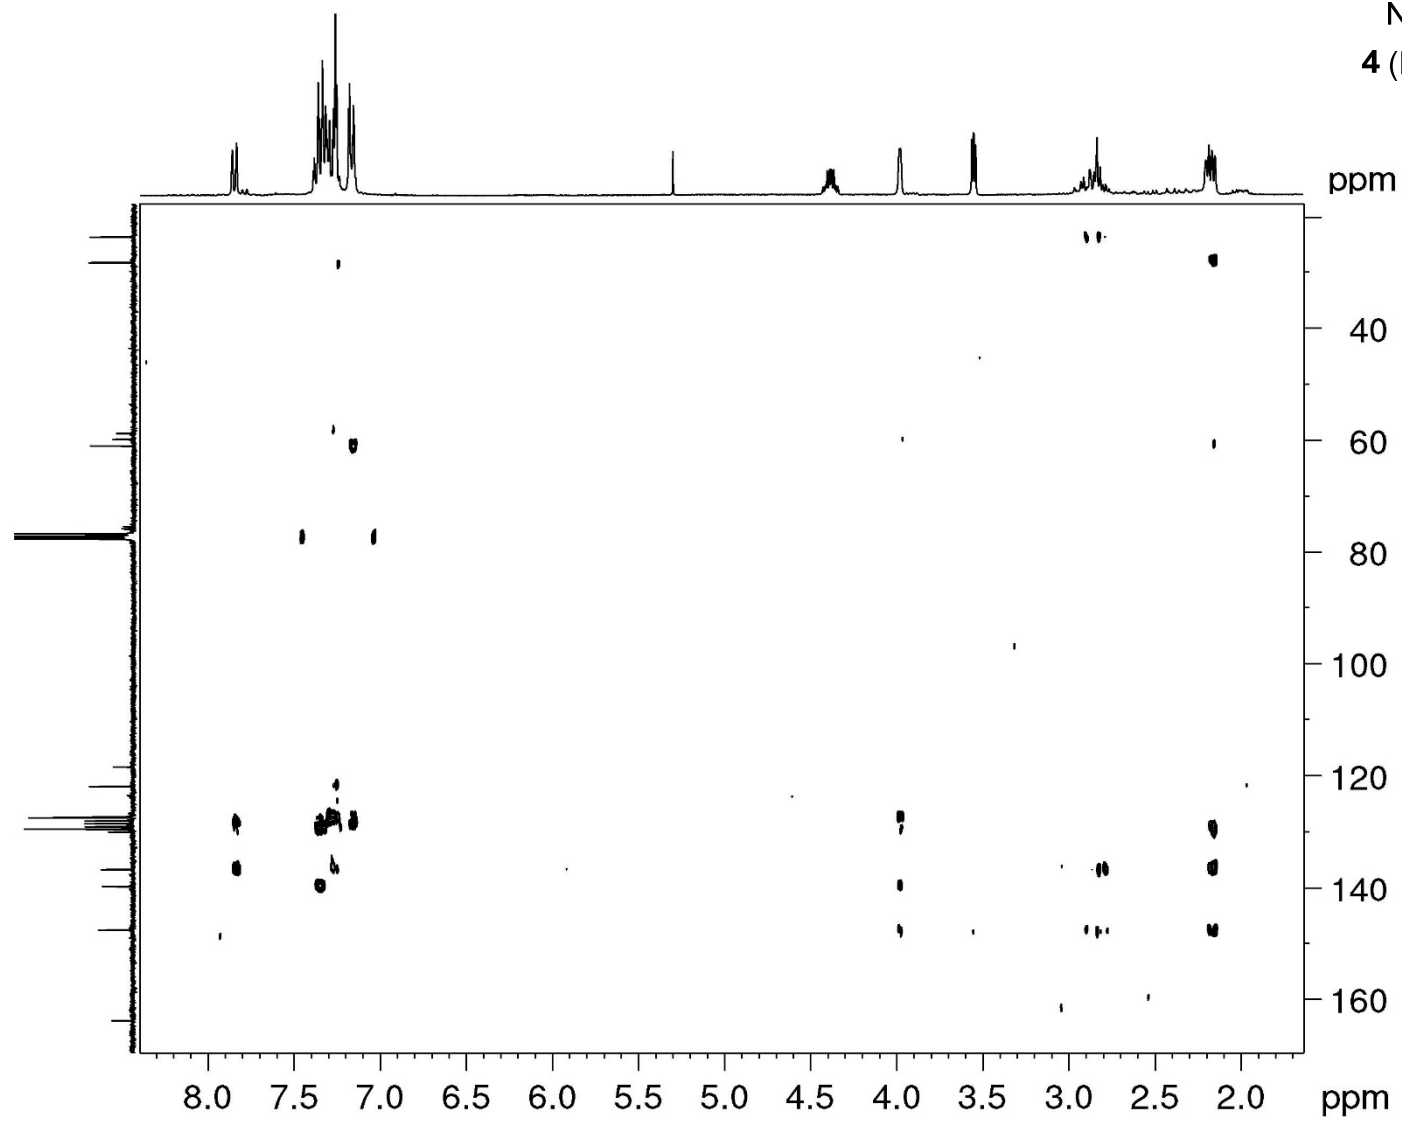

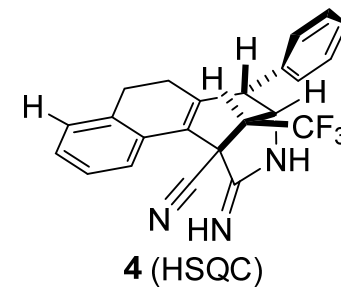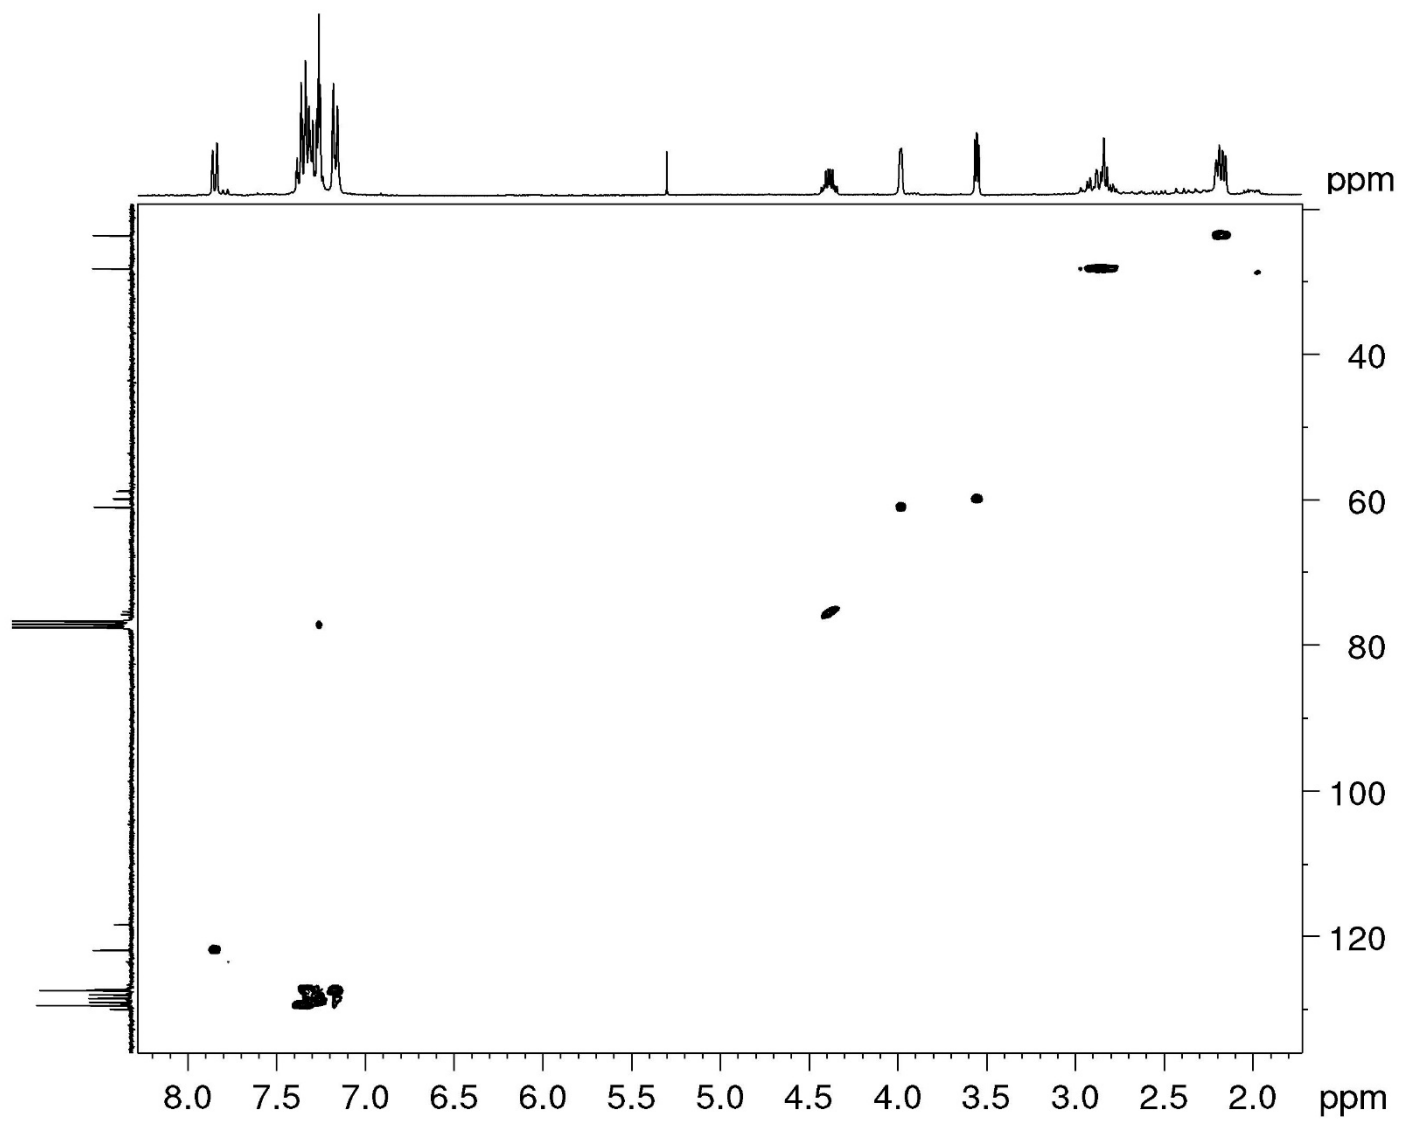



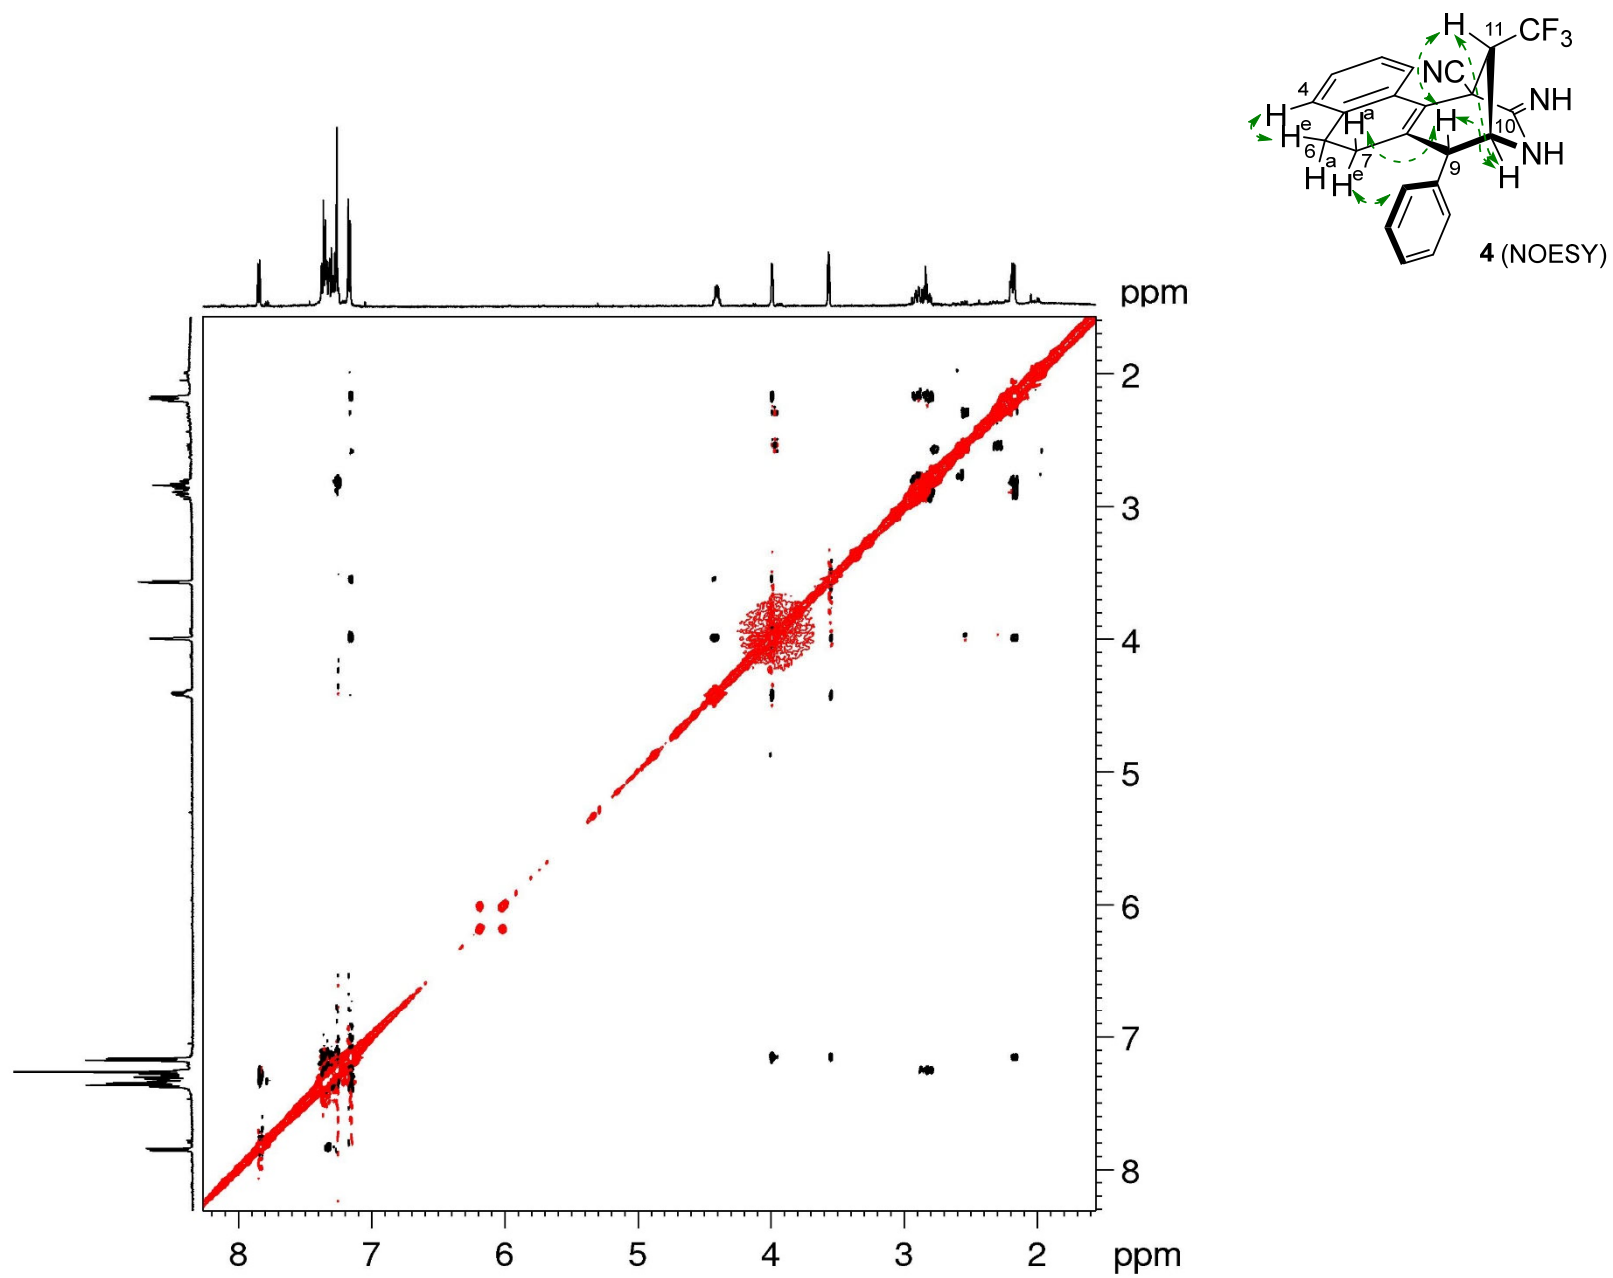

Supplement: d1cc03161a1.pdf [file d1cc03161a1.pdf]
